# Supplementary material for: Prevalence of Autism Spectrum Disorders in a Total Population Sample
Source: Atypon-hosted journal article supplement (doi:10.1176/appi.ajp.2011.10101532), 2011-05-10
Supplement: ajp_168_09_904_02.pdf [file ajp_168_09_904_02.pdf]

Association results and summary statistics for all 12 endophenotypes and 1,403 cleaned SNPs.

|    | A   | B      | C          | D             | E             | F                      | G                | H                | I                      | J                     | K                  | L                 | M              | N             | O                         | P                        |
|----|-----|--------|------------|---------------|---------------|------------------------|------------------|------------------|------------------------|-----------------------|--------------------|-------------------|----------------|---------------|---------------------------|--------------------------|
| 1  | Chr | Gene   | SNP ID     | Position (bp) | Position (cM) | Minor allele frequency | Hardy-Weinberg P | Reference allele | H2_Prepulse inhibition | P_Prepulse inhibition | H2_P50 suppression | P_P50 suppression | H2_Antisaccade | P_Antisaccade | H2_Continuous performance | P_Continuous performance |
| 2  | 1   | HTR6   | rs9064     | 19881467      | 48.16         | 0.25                   | 0.335            | A                | 0.35%                  | 0.31                  | 0.18%              | 0.5               | 0.09%          | 0.59          | 0.00%                     | 0.98                     |
| 3  | 1   | GRIK3  | rs517176   | 37067995      | 68.62         | 0.15                   | 0.784            | T                | 0.00%                  | 0.92                  | 0.16%              | 0.5               | 0.21%          | 0.4           | 0.03%                     | 0.74                     |
| 4  | 1   | GRIK3  | rs570743   | 37076603      | 68.62         | 0.15                   | 0.394            | G                | 0.00%                  | 0.97                  | 0.32%              | 0.3               | 0.11%          | 0.55          | 0.04%                     | 0.71                     |
| 5  | 1   | GRIK3  | rs3767045  | 37083256      | 68.63         | 0.11                   | 1.000            | G                | 0.07%                  | 0.65                  | 0.00%              | 1                 | 0.00%          | 0.94          | 0.23%                     | 0.37                     |
| 6  | 1   | GRIK3  | rs904896   | 37093554      | 68.63         | 0.23                   | 0.410            | C                | 0.00%                  | 0.94                  | 0.11%              | 0.6               | 0.05%          | 0.68          | 0.00%                     | 0.94                     |
| 7  | 1   | GRIK3  | rs12067006 | 37097522      | 68.63         | 0.31                   | 0.500            | T                | 0.18%                  | 0.45                  | 0.04%              | 0.7               | 0.09%          | 0.58          | 0.46%                     | 0.21                     |
| 8  | 1   | GRIK3  | rs1392745  | 37106082      | 68.64         | 0.09                   | 0.058            | A                | 1.77%                  | 0.031                 | 0.06%              | 0.7               | 0.97%          | 0.057         | 0.44%                     | 0.19                     |
| 9  | 1   | GRIK3  | rs533337   | 37113564      | 68.64         | 0.12                   | 0.734            | G                | 1.46%                  | 0.034                 | 0.00%              | 0.9               | 0.10%          | 0.56          | 0.03%                     | 0.74                     |
| 10 | 1   | GRIK3  | rs1587526  | 37135063      | 68.66         | 0.16                   | 0.011            | G                | 1.22%                  | 0.05                  | 0.04%              | 0.7               | 0.06%          | 0.63          | 0.00%                     | 1                        |
| 11 | 1   | GRIK3  | rs1027599  | 37164007      | 68.68         | 0.16                   | 0.097            | T                | 1.50%                  | 0.032                 | 0.02%              | 0.8               | 0.00%          | 0.91          | 0.13%                     | 0.49                     |
| 12 | 1   | GRIK3  | rs1334804  | 37167831      | 68.68         | 0.19                   | 0.649            | T                | 0.94%                  | 0.081                 | 0.00%              | 1                 | 0.20%          | 0.39          | 0.05%                     | 0.66                     |
| 13 | 1   | GRIK3  | rs7555221  | 37170848      | 68.68         | 0.17                   | 0.804            | T                | 0.87%                  | 0.085                 | 0.06%              | 0.7               | 0.09%          | 0.57          | 0.00%                     | 0.94                     |
| 14 | 1   | GRIK3  | rs7517274  | 37174588      | 68.68         | 0.29                   | 0.080            | A                | 0.08%                  | 0.62                  | 0.34%              | 0.4               | 0.81%          | 0.111         | 0.41%                     | 0.25                     |
| 15 | 1   | GRIK3  | rs1160752  | 37175999      | 68.68         | 0.40                   | 1.000            | C                | 0.02%                  | 0.79                  | 0.30%              | 0.4               | 1.24%          | 0.043         | 0.02%                     | 0.81                     |
| 16 | 1   | GRIK3  | rs3767078  | 37177505      | 68.68         | 0.01                   | 1.000            | T                | 0.23%                  | 0.36                  | 0.06%              | 0.7               | 0.17%          | 0.45          | 0.42%                     | 0.24                     |
| 17 | 1   | GRIK3  | rs3767087  | 37188856      | 68.69         | 0.07                   | 0.605            | A                | 1.06%                  | 0.072                 | 0.03%              | 0.8               | 0.30%          | 0.32          | 0.03%                     | 0.75                     |
| 18 | 1   | GRIK3  | rs3767088  | 37189748      | 68.69         | 0.25                   | 0.127            | C                | 0.01%                  | 0.84                  | 0.03%              | 0.8               | 0.54%          | 0.2           | 0.54%                     | 0.18                     |
| 19 | 1   | GRIK3  | rs535620   | 37192428      | 68.69         | 0.31                   | 0.616            | G                | 0.42%                  | 0.28                  | 0.13%              | 0.6               | 0.09%          | 0.6           | 0.75%                     | 0.12                     |
| 20 | 1   | GRIK3  | rs10489412 | 37206210      | 68.70         | 0.07                   | 0.184            | C                | 0.06%                  | 0.65                  | 0.03%              | 0.8               | 0.03%          | 0.74          | 0.59%                     | 0.136                    |
| 21 | 1   | GRIK3  | rs697923   | 37207734      | 68.71         | 0.27                   | 0.147            | T                | 0.02%                  | 0.82                  | 0.61%              | 0.2               | 0.07%          | 0.62          | 0.63%                     | 0.125                    |
| 22 | 1   | GRIK3  | rs575605   | 37210363      | 68.71         | 0.31                   | 0.402            | G                | 2.26%                  | 0.0097                | 0.09%              | 0.6               | 0.15%          | 0.5           | 0.04%                     | 0.73                     |
| 23 | 1   | GRIK3  | rs12066663 | 37228066      | 68.76         | 0.02                   | 0.055            | A                | 0.02%                  | 0.8                   | 0.00%              | 0.9               | 0.58%          | 0.122         | 0.11%                     | 0.54                     |
| 24 | 1   | GRIK3  | rs12746787 | 37229889      | 68.76         | 0.02                   | 1.000            | G                | 0.14%                  | 0.48                  | 0.83%              | 0.08              | 0.24%          | 0.4           | 0.08%                     | 0.61                     |
| 25 | 1   | SLC6A9 | rs1362153  | 44241618      | 78.40         | 0.14                   | 1.000            | T                | 1.47%                  | 0.042                 | 0.05%              | 0.7               | 0.01%          | 0.83          | 0.07%                     | 0.61                     |
| 26 | 1   | SLC6A9 | rs6660227  | 44243365      | 78.40         | 0.02                   | 1.000            | G                | 0.05%                  | 0.74                  | 0.01%              | 0.8               | 0.02%          | 0.77          | 0.01%                     | 0.89                     |
| 27 | 1   | SLC6A9 | rs6670336  | 44243903      | 78.40         | 0.01                   | 1.000            | C                | 0.09%                  | 0.62                  | 0.01%              | 0.9               | 0.00%          | 0.96          | 0.01%                     | 0.87                     |
| 28 | 1   | SLC6A9 | rs2486000  | 44250594      | 78.40         | 0.18                   | 1.000            | G                | 0.52%                  | 0.2                   | 0.22%              | 0.4               | 0.51%          | 0.19          | 0.51%                     | 0.18                     |
| 29 | 1   | SLC1A7 | rs899974   | 53322775      | 83.41         | 0.08                   | 1.000            | T                | 0.06%                  | 0.67                  | 0.16%              | 0.5               | 0.09%          | 0.57          | 0.00%                     | 0.91                     |
| 30 | 1   | SLC1A7 | rs1288373  | 53351990      | 83.45         | 0.11                   | 0.015            | T                | 0.46%                  | 0.22                  | 0.00%              | 1                 | 0.00%          | 0.94          | 0.01%                     | 0.84                     |
| 31 | 1   | SLC1A7 | rs1769299  | 53358311      | 83.46         | 0.46                   | 0.461            | T                | 0.01%                  | 0.89                  | 0.07%              | 0.7               | 0.00%          | 0.97          | 0.09%                     | 0.59                     |
| 32 | 1   | SLC1A7 | rs1769309  | 53363459      | 83.46         | 0.35                   | 1.000            | G                | 0.00%                  | 0.95                  | 0.51%              | 0.3               | 0.05%          | 0.7           | 0.27%                     | 0.34                     |
| 33 | 1   | SLC1A7 | rs3737989  | 53372666      | 83.48         | 0.16                   | 0.054            | A                | 0.04%                  | 0.72                  | 0.11%              | 0.6               | 0.05%          | 0.66          | 0.00%                     | 0.96                     |
| 34 | 1   | SLC1A7 | rs1288367  | 53378472      | 83.49         | 0.18                   | 0.805            | G                | 0.51%                  | 0.2                   | 0.20%              | 0.5               | 0.03%          | 0.74          | 0.08%                     | 0.6                      |

|    | Q                     | R                    | S                  | T                 | U              | V             | W              | X             | Y                 | Z                | AA                    | AB                   | AC                         | AD                        | AE                     | AF                    |
|----|-----------------------|----------------------|--------------------|-------------------|----------------|---------------|----------------|---------------|-------------------|------------------|-----------------------|----------------------|----------------------------|---------------------------|------------------------|-----------------------|
| 1  | H2_Letter-Number Span | P_Letter-Number Span | H2_Verbal learning | P_Verbal learning | H2_Abstraction | P_Abstraction | H2_Face memory | P_Face memory | H2_Spatial memory | P_Spatial memory | H2_Spatial processing | P_Spatial processing | H2_Sensori-motor dexterity | P_Sensori-motor dexterity | H2_Emotion recognition | P_Emotion recognition |
| 2  | 0.05%                 | 0.7                  | 0.11%              | 0.52              | 0.08%          | 0.6           | 0.45%          | 0.2           | 0.03%             | 0.77             | 1.41%                 | 0.037                | 0.01%                      | 0.9                       | 0.30%                  | 0.3                   |
| 3  | 0.18%                 | 0.4                  | 0.00%              | 0.93              | 0.21%          | 0.4           | 0.21%          | 0.4           | 0.01%             | 0.84             | 0.04%                 | 0.72                 | 0.01%                      | 0.8                       | 0.18%                  | 0.4                   |
| 4  | 0.07%                 | 0.6                  | 0.02%              | 0.82              | 0.21%          | 0.4           | 0.13%          | 0.5           | 0.03%             | 0.77             | 0.48%                 | 0.26                 | 0.26%                      | 0.4                       | 0.42%                  | 0.2                   |
| 5  | 0.10%                 | 0.6                  | 0.06%              | 0.65              | 0.09%          | 0.6           | 0.09%          | 0.6           | 0.07%             | 0.64             | 0.69%                 | 0.137                | 0.02%                      | 0.8                       | 0.10%                  | 0.6                   |
| 6  | 0.21%                 | 0.4                  | 0.01%              | 0.83              | 0.00%          | 1             | 0.30%          | 0.3           | 0.35%             | 0.29             | 0.06%                 | 0.69                 | 0.08%                      | 0.6                       | 0.36%                  | 0.3                   |
| 7  | 0.09%                 | 0.6                  | 0.12%              | 0.49              | 0.03%          | 0.8           | 0.05%          | 0.7           | 0.00%             | 0.94             | 0.57%                 | 0.18                 | 0.20%                      | 0.4                       | 0.06%                  | 0.6                   |
| 8  | 0.02%                 | 0.8                  | 0.00%              | 0.97              | 0.18%          | 0.4           | 0.19%          | 0.4           | 0.26%             | 0.33             | 0.05%                 | 0.67                 | 0.14%                      | 0.5                       | 0.26%                  | 0.3                   |
| 9  | 0.98%                 | 0.05                 | 0.09%              | 0.55              | 0.14%          | 0.5           | 0.26%          | 0.3           | 0.00%             | 0.91             | 0.60%                 | 0.16                 | 0.07%                      | 0.6                       | 0.00%                  | 0.9                   |
| 10 | 0.10%                 | 0.5                  | 0.11%              | 0.48              | 0.29%          | 0.2           | 0.56%          | 0.11          | 0.03%             | 0.75             | 0.18%                 | 0.43                 | 0.17%                      | 0.4                       | 0.05%                  | 0.6                   |
| 11 | 0.69%                 | 0.1                  | 0.00%              | 0.97              | 0.03%          | 0.7           | 0.25%          | 0.3           | 0.04%             | 0.7              | 0.20%                 | 0.42                 | 0.03%                      | 0.7                       | 0.05%                  | 0.6                   |
| 12 | 0.63%                 | 0.11                 | 0.06%              | 0.63              | 0.04%          | 0.7           | 0.01%          | 0.9           | 0.20%             | 0.39             | 0.19%                 | 0.42                 | 0.00%                      | 1                         | 0.00%                  | 0.9                   |
| 13 | 0.88%                 | 0.06                 | 0.07%              | 0.59              | 0.05%          | 0.7           | 0.01%          | 0.9           | 0.24%             | 0.35             | 0.37%                 | 0.26                 | 0.17%                      | 0.4                       | 0.00%                  | 0.9                   |
| 14 | 0.00%                 | 1                    | 0.65%              | 0.132             | 1.91%          | 0.013         | 0.44%          | 0.2           | 0.06%             | 0.67             | 0.00%                 | 0.99                 | 0.05%                      | 0.7                       | 0.74%                  | 0.13                  |
| 15 | 0.03%                 | 0.7                  | 0.05%              | 0.67              | 0.06%          | 0.6           | 0.05%          | 0.7           | 0.37%             | 0.27             | 0.89%                 | 0.097                | 0.09%                      | 0.6                       | 0.01%                  | 0.9                   |
| 16 | 0.09%                 | 0.6                  | 0.93%              | 0.071             | 0.06%          | 0.7           | 0.17%          | 0.4           | 0.27%             | 0.35             | 0.77%                 | 0.127                | 0.01%                      | 0.9                       | 0.19%                  | 0.4                   |
| 17 | 0.29%                 | 0.3                  | 0.02%              | 0.79              | 0.11%          | 0.5           | 1.24%          | 0.04          | 0.42%             | 0.27             | 0.06%                 | 0.68                 | 1.65%                      | 0.03                      | 0.13%                  | 0.5                   |
| 18 | 0.55%                 | 0.2                  | 0.20%              | 0.4               | 0.04%          | 0.7           | 0.01%          | 0.8           | 0.83%             | 0.097            | 0.61%                 | 0.17                 | 0.10%                      | 0.6                       | 0.00%                  | 1                     |
| 19 | 0.06%                 | 0.7                  | 0.15%              | 0.47              | 0.00%          | 1             | 0.03%          | 0.8           | 0.77%             | 0.116            | 0.00%                 | 0.95                 | 0.89%                      | 0.09                      | 0.23%                  | 0.4                   |
| 20 | 0.05%                 | 0.7                  | 0.15%              | 0.44              | 0.23%          | 0.3           | 0.18%          | 0.4           | 1.78%             | 0.0079           | 0.11%                 | 0.53                 | 0.03%                      | 0.7                       | 1.97%                  | 0.004                 |
| 21 | 0.04%                 | 0.7                  | 0.07%              | 0.59              | 0.00%          | 0.9           | 0.92%          | 0.05          | 0.08%             | 0.58             | 0.02%                 | 0.81                 | 0.05%                      | 0.7                       | 2.06%                  | 0.005                 |
| 22 | 0.45%                 | 0.2                  | 0.22%              | 0.38              | 0.32%          | 0.3           | 0.01%          | 0.8           | 0.49%             | 0.2              | 0.11%                 | 0.57                 | 0.00%                      | 1                         | 0.48%                  | 0.2                   |
| 23 | 0.00%                 | 0.9                  | 0.01%              | 0.86              | 0.07%          | 0.6           | 0.00%          | 1             | 0.01%             | 0.85             | 0.11%                 | 0.52                 | 0.02%                      | 0.8                       | 0.01%                  | 0.8                   |
| 24 | 0.04%                 | 0.7                  | 0.19%              | 0.41              | 0.01%          | 0.8           | 1.01%          | 0.06          | 0.24%             | 0.37             | 0.69%                 | 0.16                 | 0.82%                      | 0.11                      | 0.00%                  | 1                     |
| 25 | 0.01%                 | 0.9                  | 0.01%              | 0.88              | 0.48%          | 0.2           | 0.08%          | 0.6           | 0.00%             | 0.93             | 0.11%                 | 0.55                 | 0.19%                      | 0.4                       | 0.03%                  | 0.8                   |
| 26 | 0.06%                 | 0.6                  | 0.18%              | 0.4               | 0.00%          | 0.9           | 0.08%          | 0.6           | 0.01%             | 0.82             | 0.05%                 | 0.7                  | 0.00%                      | 1                         | 0.03%                  | 0.7                   |
| 27 | 0.26%                 | 0.3                  | 0.19%              | 0.37              | 0.23%          | 0.4           | 0.08%          | 0.6           | 0.00%             | 0.98             | 0.08%                 | 0.62                 | 0.00%                      | 0.9                       | 0.01%                  | 0.8                   |
| 28 | 0.02%                 | 0.8                  | 0.04%              | 0.7               | 0.33%          | 0.3           | 0.01%          | 0.8           | 0.01%             | 0.83             | 0.01%                 | 0.83                 | 0.59%                      | 0.2                       | 0.03%                  | 0.8                   |
| 29 | 0.87%                 | 0.07                 | 0.43%              | 0.2               | 0.01%          | 0.9           | 0.14%          | 0.5           | 0.36%             | 0.27             | 0.57%                 | 0.2                  | 0.04%                      | 0.7                       | 0.01%                  | 0.9                   |
| 30 | 0.37%                 | 0.2                  | 0.46%              | 0.17              | 0.03%          | 0.7           | 0.04%          | 0.7           | 1.08%             | 0.044            | 0.35%                 | 0.27                 | 0.00%                      | 1                         | 0.04%                  | 0.7                   |
| 31 | 0.00%                 | 1                    | 0.00%              | 0.96              | 0.22%          | 0.4           | 0.39%          | 0.2           | 0.46%             | 0.22             | 0.00%                 | 0.9                  | 0.57%                      | 0.2                       | 0.12%                  | 0.5                   |
| 32 | 0.22%                 | 0.4                  | 0.14%              | 0.48              | 0.14%          | 0.5           | 0.22%          | 0.4           | 1.01%             | 0.075            | 0.01%                 | 0.89                 | 0.13%                      | 0.5                       | 0.04%                  | 0.7                   |
| 33 | 0.00%                 | 0.9                  | 0.01%              | 0.82              | 0.13%          | 0.5           | 0.90%          | 0.07          | 0.02%             | 0.8              | 0.27%                 | 0.35                 | 0.01%                      | 0.9                       | 0.01%                  | 0.9                   |
| 34 | 0.27%                 | 0.3                  | 0.65%              | 0.119             | 0.00%          | 0.9           | 0.26%          | 0.3           | 0.09%             | 0.58             | 0.36%                 | 0.29                 | 0.01%                      | 0.9                       | 0.83%                  | 0.09                  |

|    | A   | B      | C          | D             | E             | F                      | G                | H                | I                      | J                     | K                  | L                 | M              | N             | O                         | P                        |
|----|-----|--------|------------|---------------|---------------|------------------------|------------------|------------------|------------------------|-----------------------|--------------------|-------------------|----------------|---------------|---------------------------|--------------------------|
| 1  | Chr | Gene   | SNP ID     | Position (bp) | Position (cM) | Minor allele frequency | Hardy-Weinberg P | Reference allele | H2_Prepulse inhibition | P_Prepulse inhibition | H2_P50 suppression | P_P50 suppression | H2_Antisaccade | P_Antisaccade | H2_Continuous performance | P_Continuous performance |
| 35 | 1   | SLC1A7 | rs2486634  | 53383440      | 83.49         | 0.37                   | 0.087            | C                | 0.00%                  | 0.98                  | 0.02%              | 0.8               | 0.50%          | 0.23          | 0.02%                     | 0.79                     |
| 36 | 1   | SLC1A7 | rs1679933  | 53384287      | 83.50         | 0.35                   | 0.748            | A                | 0.21%                  | 0.42                  | 0.04%              | 0.8               | 0.02%          | 0.79          | 0.00%                     | 0.9                      |
| 37 | 1   | GPR88  | rs2809823  | 100776350     | 133.35        | 0.49                   | 0.885            | G                | 0.85%                  | 0.118                 | 0.05%              | 0.7               | 0.76%          | 0.119         | 0.50%                     | 0.2                      |
| 38 | 1   | SNAPAP | rs3795396  | 151902049     | 158.44        | 0.45                   | 0.109            | A                | 0.00%                  | 0.97                  | 0.91%              | 0.13              | 0.22%          | 0.42          | 2.83%                     | 0.0025                   |
| 39 | 1   | CHRNA2 | rs4845652  | 152804829     | 159.06        | 0.10                   | 0.696            | C                | 0.90%                  | 0.12                  | 0.68%              | 0.2               | 0.52%          | 0.2           | 0.06%                     | 0.66                     |
| 40 | 1   | CHRNA2 | rs3811450  | 152817656     | 159.08        | 0.05                   | 0.083            | C                | 0.76%                  | 0.103                 | 0.03%              | 0.8               | 0.26%          | 0.33          | 0.19%                     | 0.4                      |
| 41 | 1   | NOS1AP | rs6660701  | 160307530     | 169.81        | 0.37                   | 1.000            | G                | 0.58%                  | 0.19                  | 0.94%              | 0.11              | 0.11%          | 0.54          | 0.05%                     | 0.67                     |
| 42 | 1   | NOS1AP | rs1337063  | 160325402     | 169.81        | 0.05                   | 0.346            | G                | 0.74%                  | 0.18                  | 0.02%              | 0.8               | 0.04%          | 0.76          | 0.98%                     | 0.074                    |
| 43 | 1   | NOS1AP | rs1415259  | 160351933     | 169.82        | 0.38                   | 0.226            | A                | 0.06%                  | 0.66                  | 0.26%              | 0.4               | 0.37%          | 0.26          | 0.06%                     | 0.64                     |
| 44 | 1   | NOS1AP | rs7538490  | 160357954     | 169.82        | 0.29                   | 1.000            | C                | 0.17%                  | 0.48                  | 0.12%              | 0.6               | 0.56%          | 0.18          | 0.08%                     | 0.59                     |
| 45 | 1   | NOS1AP | rs10458392 | 160358734     | 169.82        | 0.23                   | 0.539            | T                | 0.02%                  | 0.8                   | 0.49%              | 0.3               | 0.35%          | 0.29          | 0.13%                     | 0.5                      |
| 46 | 1   | NOS1AP | rs1572495  | 160365925     | 169.82        | 0.14                   | 1.000            | C                | 0.02%                  | 0.81                  | 0.07%              | 0.7               | 0.11%          | 0.56          | 1.48%                     | 0.025                    |
| 47 | 1   | NOS1AP | rs10494368 | 160369894     | 169.82        | 0.15                   | 1.000            | T                | 0.03%                  | 0.76                  | 0.02%              | 0.8               | 0.19%          | 0.44          | 1.75%                     | 0.015                    |
| 48 | 1   | NOS1AP | rs4656355  | 160390421     | 169.82        | 0.41                   | 0.136            | G                | 0.31%                  | 0.32                  | 0.00%              | 0.9               | 0.01%          | 0.85          | 1.36%                     | 0.031                    |
| 49 | 1   | NOS1AP | rs951121   | 160393068     | 169.82        | 0.19                   | 1.000            | G                | 0.54%                  | 0.2                   | 0.42%              | 0.3               | 0.42%          | 0.25          | 1.32%                     | 0.038                    |
| 50 | 1   | NOS1AP | rs1538018  | 160397105     | 169.83        | 0.27                   | 1.000            | G                | 2.26%                  | 0.0092                | 1.21%              | 0.09              | 0.78%          | 0.112         | 0.64%                     | 0.146                    |
| 51 | 1   | NOS1AP | rs6427659  | 160408973     | 169.83        | 0.04                   | 0.341            | G                | 0.03%                  | 0.73                  | 0.00%              | 1                 | 0.75%          | 0.115         | 0.00%                     | 0.97                     |
| 52 | 1   | NOS1AP | rs7412698  | 160421843     | 169.83        | 0.40                   | 0.053            | C                | 0.20%                  | 0.43                  | 0.01%              | 0.9               | 0.07%          | 0.64          | 0.22%                     | 0.38                     |
| 53 | 1   | NOS1AP | rs4657165  | 160427626     | 169.83        | 0.05                   | 1.000            | G                | 0.11%                  | 0.57                  | 0.01%              | 0.9               | 0.14%          | 0.52          | 0.01%                     | 0.86                     |
| 54 | 1   | NOS1AP | rs1415263  | 160432667     | 169.83        | 0.40                   | 0.548            | C                | 0.31%                  | 0.35                  | 0.04%              | 0.8               | 0.35%          | 0.3           | 0.14%                     | 0.5                      |
| 55 | 1   | NOS1AP | rs4531275  | 160453174     | 169.83        | 0.35                   | 0.875            | C                | 0.16%                  | 0.48                  | 0.00%              | 1                 | 0.40%          | 0.23          | 0.07%                     | 0.61                     |
| 56 | 1   | NOS1AP | rs6683968  | 160458036     | 169.84        | 0.37                   | 0.536            | G                | 0.16%                  | 0.48                  | 0.02%              | 0.8               | 0.35%          | 0.26          | 0.15%                     | 0.46                     |
| 57 | 1   | NOS1AP | rs7548168  | 160465166     | 169.84        | 0.02                   | 0.073            | C                | 0.01%                  | 0.9                   | 0.09%              | 0.6               | 0.06%          | 0.67          | 0.09%                     | 0.55                     |
| 58 | 1   | NOS1AP | rs8179404  | 160467744     | 169.84        | 0.20                   | 1.000            | T                | 0.81%                  | 0.143                 | 0.05%              | 0.7               | 0.17%          | 0.48          | 0.15%                     | 0.48                     |
| 59 | 1   | NOS1AP | rs4657178  | 160477234     | 169.84        | 0.25                   | 0.565            | C                | 0.00%                  | 0.94                  | 0.01%              | 0.9               | 0.01%          | 0.87          | 1.18%                     | 0.051                    |
| 60 | 1   | NOS1AP | rs4145621  | 160485312     | 169.87        | 0.49                   | 1.000            | C                | 0.02%                  | 0.81                  | 0.25%              | 0.4               | 0.08%          | 0.61          | 0.18%                     | 0.43                     |
| 61 | 1   | NOS1AP | rs4584372  | 160502061     | 169.93        | 0.27                   | 0.592            | T                | 0.46%                  | 0.27                  | 0.06%              | 0.7               | 0.00%          | 0.95          | 0.52%                     | 0.19                     |
| 62 | 1   | NOS1AP | rs7528328  | 160514403     | 169.98        | 0.18                   | 1.000            | T                | 0.20%                  | 0.47                  | 0.02%              | 0.9               | 0.06%          | 0.67          | 0.53%                     | 0.18                     |
| 63 | 1   | NOS1AP | rs6677154  | 160521288     | 170.00        | 0.24                   | 0.688            | A                | 0.17%                  | 0.48                  | 0.13%              | 0.6               | 0.15%          | 0.49          | 0.03%                     | 0.75                     |
| 64 | 1   | NOS1AP | rs2819328  | 160550681     | 170.11        | 0.06                   | 0.506            | G                | 0.66%                  | 0.2                   | 0.00%              | 0.9               | 0.53%          | 0.17          | 0.00%                     | 0.94                     |
| 65 | 1   | NOS1AP | rs365522   | 160559210     | 170.15        | 0.35                   | 1.000            | G                | 0.00%                  | 0.94                  | 0.09%              | 0.6               | 0.23%          | 0.4           | 0.19%                     | 0.43                     |
| 66 | 1   | NOS1AP | rs347300   | 160566447     | 170.17        | 0.38                   | 0.361            | A                | 0.19%                  | 0.47                  | 0.07%              | 0.7               | 0.10%          | 0.58          | 0.09%                     | 0.6                      |
| 67 | 1   | NOS1AP | rs347311   | 160570531     | 170.19        | 0.28                   | 0.281            | G                | 0.15%                  | 0.5                   | 0.97%              | 0.11              | 0.05%          | 0.67          | 0.02%                     | 0.81                     |

Association results and summary statistics for all 12 endophenotypes and 1,403 cleaned SNPs.

|    | Q                     | R                    | S                  | T                 | U              | V             | W              | X             | Y                 | Z                | AA                    | AB                   | AC                         | AD                        | AE                     | AF                    |
|----|-----------------------|----------------------|--------------------|-------------------|----------------|---------------|----------------|---------------|-------------------|------------------|-----------------------|----------------------|----------------------------|---------------------------|------------------------|-----------------------|
| 1  | H2_Letter-Number Span | P_Letter-Number Span | H2_Verbal learning | P_Verbal learning | H2_Abstraction | P_Abstraction | H2_Face memory | P_Face memory | H2_Spatial memory | P_Spatial memory | H2_Spatial processing | P_Spatial processing | H2_Sensori-motor dexterity | P_Sensori-motor dexterity | H2_Emotion recognition | P_Emotion recognition |
| 35 | 0.05%                 | 0.7                  | 0.17%              | 0.45              | 0.12%          | 0.5           | 0.33%          | 0.3           | 0.79%             | 0.12             | 0.57%                 | 0.2                  | 0.06%                      | 0.7                       | 0.35%                  | 0.3                   |
| 36 | 0.39%                 | 0.2                  | 0.01%              | 0.85              | 0.00%          | 1             | 0.25%          | 0.3           | 0.01%             | 0.89             | 0.23%                 | 0.41                 | 0.18%                      | 0.4                       | 0.06%                  | 0.7                   |
| 37 | 0.38%                 | 0.2                  | 0.51%              | 0.18              | 0.08%          | 0.6           | 1.02%          | 0.06          | 0.05%             | 0.68             | 0.06%                 | 0.67                 | 0.25%                      | 0.4                       | 0.01%                  | 0.8                   |
| 38 | 0.03%                 | 0.7                  | 0.00%              | 0.91              | 0.00%          | 1             | 0.00%          | 0.9           | 1.02%             | 0.074            | 0.14%                 | 0.52                 | 0.30%                      | 0.3                       | 0.11%                  | 0.5                   |
| 39 | 0.77%                 | 0.11                 | 0.02%              | 0.78              | 0.20%          | 0.4           | 0.00%          | 1             | 0.00%             | 0.97             | 0.00%                 | 0.9                  | 0.01%                      | 0.9                       | 0.11%                  | 0.5                   |
| 40 | 0.00%                 | 1                    | 0.14%              | 0.46              | 0.51%          | 0.2           | 0.05%          | 0.7           | 0.56%             | 0.15             | 0.00%                 | 0.96                 | 0.10%                      | 0.5                       | 0.13%                  | 0.5                   |
| 41 | 0.34%                 | 0.3                  | 0.00%              | 0.99              | 0.05%          | 0.7           | 0.40%          | 0.2           | 0.12%             | 0.51             | 0.07%                 | 0.64                 | 1.17%                      | 0.04                      | 0.32%                  | 0.3                   |
| 42 | 0.47%                 | 0.2                  | 0.00%              | 0.91              | 0.08%          | 0.6           | 0.05%          | 0.7           | 0.37%             | 0.27             | 0.04%                 | 0.72                 | 0.52%                      | 0.2                       | 0.06%                  | 0.7                   |
| 43 | 0.50%                 | 0.2                  | 0.02%              | 0.78              | 0.00%          | 0.9           | 0.19%          | 0.4           | 0.07%             | 0.62             | 0.12%                 | 0.53                 | 1.21%                      | 0.03                      | 0.34%                  | 0.3                   |
| 44 | 0.15%                 | 0.5                  | 0.02%              | 0.8               | 0.02%          | 0.8           | 0.02%          | 0.8           | 0.29%             | 0.32             | 0.01%                 | 0.86                 | 0.40%                      | 0.2                       | 0.41%                  | 0.2                   |
| 45 | 0.00%                 | 0.9                  | 0.03%              | 0.75              | 0.14%          | 0.5           | 0.09%          | 0.6           | 0.90%             | 0.08             | 0.06%                 | 0.67                 | 0.60%                      | 0.15                      | 0.50%                  | 0.2                   |
| 46 | 0.32%                 | 0.3                  | 0.01%              | 0.86              | 0.18%          | 0.4           | 0.11%          | 0.5           | 0.24%             | 0.37             | 0.09%                 | 0.58                 | 0.02%                      | 0.8                       | 0.11%                  | 0.5                   |
| 47 | 0.28%                 | 0.3                  | 0.03%              | 0.75              | 0.18%          | 0.4           | 0.08%          | 0.6           | 0.11%             | 0.54             | 0.05%                 | 0.68                 | 0.06%                      | 0.6                       | 0.13%                  | 0.5                   |
| 48 | 0.77%                 | 0.09                 | 0.08%              | 0.58              | 0.03%          | 0.7           | 0.03%          | 0.7           | 0.08%             | 0.6              | 0.01%                 | 0.87                 | 0.51%                      | 0.2                       | 0.04%                  | 0.7                   |
| 49 | 0.96%                 | 0.07                 | 0.02%              | 0.78              | 0.07%          | 0.6           | 0.00%          | 0.9           | 0.01%             | 0.87             | 0.07%                 | 0.66                 | 0.00%                      | 1                         | 0.13%                  | 0.5                   |
| 50 | 0.03%                 | 0.7                  | 0.34%              | 0.27              | 0.91%          | 0.08          | 0.10%          | 0.6           | 0.08%             | 0.61             | 0.10%                 | 0.58                 | 0.00%                      | 1                         | 0.08%                  | 0.6                   |
| 51 | 0.11%                 | 0.5                  | 0.27%              | 0.29              | 0.00%          | 0.9           | 0.08%          | 0.5           | 0.70%             | 0.116            | 0.44%                 | 0.25                 | 0.24%                      | 0.3                       | 0.00%                  | 0.9                   |
| 52 | 0.61%                 | 0.12                 | 0.54%              | 0.148             | 0.07%          | 0.6           | 0.22%          | 0.3           | 0.05%             | 0.67             | 0.14%                 | 0.49                 | 0.44%                      | 0.2                       | 0.10%                  | 0.5                   |
| 53 | 0.04%                 | 0.7                  | 3.41%              | 0.00103           | 0.29%          | 0.3           | 0.01%          | 0.9           | 1.71%             | 0.025            | 0.00%                 | 0.97                 | 0.16%                      | 0.5                       | 0.14%                  | 0.5                   |
| 54 | 0.20%                 | 0.4                  | 0.50%              | 0.18              | 0.18%          | 0.4           | 0.14%          | 0.5           | 1.01%             | 0.071            | 0.87%                 | 0.111                | 0.00%                      | 0.9                       | 0.11%                  | 0.6                   |
| 55 | 0.27%                 | 0.3                  | 0.00%              | 0.97              | 0.18%          | 0.4           | 0.16%          | 0.4           | 0.08%             | 0.6              | 0.46%                 | 0.21                 | 0.04%                      | 0.7                       | 0.26%                  | 0.3                   |
| 56 | 0.16%                 | 0.4                  | 0.01%              | 0.85              | 0.05%          | 0.7           | 0.06%          | 0.6           | 0.12%             | 0.51             | 0.55%                 | 0.18                 | 0.02%                      | 0.8                       | 0.13%                  | 0.5                   |
| 57 | 0.40%                 | 0.2                  | 0.09%              | 0.55              | 0.04%          | 0.7           | 0.03%          | 0.8           | 0.08%             | 0.56             | 0.06%                 | 0.64                 | 0.16%                      | 0.5                       | 0.77%                  | 0.11                  |
| 58 | 0.07%                 | 0.6                  | 0.24%              | 0.36              | 0.23%          | 0.3           | 0.25%          | 0.3           | 0.07%             | 0.64             | 0.06%                 | 0.69                 | 0.01%                      | 0.8                       | 0.12%                  | 0.5                   |
| 59 | 0.20%                 | 0.4                  | 0.64%              | 0.13              | 0.07%          | 0.6           | 0.03%          | 0.7           | 0.94%             | 0.081            | 1.62%                 | 0.029                | 0.65%                      | 0.14                      | 0.60%                  | 0.2                   |
| 60 | 0.16%                 | 0.4                  | 0.39%              | 0.22              | 0.01%          | 0.9           | 0.03%          | 0.7           | 0.21%             | 0.4              | 0.01%                 | 0.9                  | 0.00%                      | 1                         | 0.06%                  | 0.6                   |
| 61 | 0.20%                 | 0.4                  | 0.00%              | 0.91              | 0.14%          | 0.5           | 0.06%          | 0.7           | 0.22%             | 0.4              | 0.00%                 | 0.99                 | 0.04%                      | 0.7                       | 0.05%                  | 0.7                   |
| 62 | 0.24%                 | 0.4                  | 0.02%              | 0.77              | 0.05%          | 0.7           | 0.25%          | 0.4           | 0.13%             | 0.52             | 0.04%                 | 0.73                 | 0.01%                      | 0.8                       | 0.06%                  | 0.6                   |
| 63 | 0.15%                 | 0.5                  | 0.01%              | 0.89              | 0.05%          | 0.7           | 0.33%          | 0.3           | 0.48%             | 0.2              | 0.67%                 | 0.145                | 0.96%                      | 0.07                      | 0.23%                  | 0.4                   |
| 64 | 0.00%                 | 1                    | 0.42%              | 0.21              | 0.00%          | 0.9           | 0.14%          | 0.4           | 0.03%             | 0.73             | 0.13%                 | 0.52                 | 0.01%                      | 0.8                       | 0.16%                  | 0.4                   |
| 65 | 0.10%                 | 0.5                  | 0.84%              | 0.086             | 0.06%          | 0.6           | 0.13%          | 0.5           | 0.12%             | 0.54             | 0.01%                 | 0.9                  | 0.00%                      | 0.9                       | 1.51%                  | 0.02                  |
| 66 | 0.06%                 | 0.6                  | 0.27%              | 0.34              | 0.02%          | 0.8           | 0.37%          | 0.3           | 0.06%             | 0.66             | 0.06%                 | 0.69                 | 0.00%                      | 0.9                       | 1.69%                  | 0.02                  |
| 67 | 0.42%                 | 0.2                  | 0.00%              | 0.89              | 0.23%          | 0.4           | 0.00%          | 1             | 0.09%             | 0.59             | 0.02%                 | 0.8                  | 0.51%                      | 0.2                       | 0.00%                  | 0.9                   |

|     | A   | B      | C          | D             | E             | F                      | G                | H                | I                      | J                     | K                  | L                 | M              | N             | O                         | P                        |
|-----|-----|--------|------------|---------------|---------------|------------------------|------------------|------------------|------------------------|-----------------------|--------------------|-------------------|----------------|---------------|---------------------------|--------------------------|
| 1   | Chr | Gene   | SNP ID     | Position (bp) | Position (cM) | Minor allele frequency | Hardy-Weinberg P | Reference allele | H2_Prepulse inhibition | P_Prepulse inhibition | H2_P50 suppression | P_P50 suppression | H2_Antisaccade | P_Antisaccade | H2_Continuous performance | P_Continuous performance |
| 68  | 1   | NOS1AP | rs347313   | 160570900     | 170.19        | 0.45                   | 0.772            | G                | 0.11%                  | 0.55                  | 0.57%              | 0.2               | 0.16%          | 0.46          | 0.00%                     | 0.97                     |
| 69  | 1   | NOS1AP | rs10800465 | 160576937     | 170.21        | 0.26                   | 1.000            | T                | 0.24%                  | 0.38                  | 1.16%              | 0.08              | 0.00%          | 0.91          | 0.24%                     | 0.36                     |
| 70  | 1   | NOS1AP | rs3751286  | 160580009     | 170.22        | 0.08                   | 0.606            | A                | 0.01%                  | 0.87                  | 0.04%              | 0.7               | 0.10%          | 0.55          | 0.04%                     | 0.67                     |
| 71  | 1   | NOS1AP | rs347273   | 160584137     | 170.24        | 0.13                   | 0.745            | T                | 0.14%                  | 0.52                  | 0.18%              | 0.5               | 0.04%          | 0.71          | 0.08%                     | 0.58                     |
| 72  | 1   | NOS1AP | rs386231   | 160592447     | 170.27        | 0.29                   | 0.077            | A                | 0.61%                  | 0.17                  | 0.06%              | 0.7               | 0.07%          | 0.62          | 0.14%                     | 0.48                     |
| 73  | 1   | NOS1AP | rs6681981  | 160598245     | 170.29        | 0.36                   | 0.757            | A                | 0.01%                  | 0.86                  | 2.46%              | 0.011             | 0.50%          | 0.2           | 0.04%                     | 0.73                     |
| 74  | 1   | NOS1AP | rs1810354  | 160602346     | 170.31        | 0.17                   | 0.782            | A                | 0.55%                  | 0.2                   | 1.20%              | 0.07              | 0.23%          | 0.39          | 0.25%                     | 0.37                     |
| 75  | 1   | NOS1AP | rs164149   | 160605205     | 170.32        | 0.46                   | 0.885            | A                | 0.06%                  | 0.69                  | 0.31%              | 0.4               | 1.28%          | 0.046         | 0.35%                     | 0.29                     |
| 76  | 1   | RGS4   | rs2661319  | 161306401     | 172.04        | 0.46                   | 0.380            | G                | 0.46%                  | 0.23                  | 0.10%              | 0.6               | 0.02%          | 0.82          | 0.25%                     | 0.35                     |
| 77  | 1   | RGS4   | rs2842030  | 161307119     | 172.04        | 0.40                   | 0.227            | T                | 0.22%                  | 0.42                  | 0.26%              | 0.4               | 0.01%          | 0.88          | 0.55%                     | 0.18                     |
| 78  | 1   | RGS4   | rs2940251  | 161314142     | 172.05        | 0.35                   | 0.265            | C                | 0.50%                  | 0.25                  | 0.05%              | 0.7               | 0.11%          | 0.58          | 0.06%                     | 0.68                     |
| 79  | 1   | ASPM   | rs10801589 | 195342817     | 212.01        | 0.50                   | 0.029            | T                | 0.05%                  | 0.7                   | 0.16%              | 0.5               | 0.00%          | 0.98          | 0.11%                     | 0.53                     |
| 80  | 1   | ASPM   | rs7551108  | 195365691     |               | 0.00                   | 1.000            |                  |                        |                       |                    |                   |                |               |                           |                          |
| 81  | 1   | ASPM   | rs877897   | 195370598     | 212.03        | 0.13                   | 0.730            | A                | 1.03%                  | 0.081                 | 0.16%              | 0.5               | 0.81%          | 0.099         | 0.00%                     | 0.95                     |
| 82  | 1   | ASPM   | rs4326657  | 195385567     | 212.04        | 0.01                   | 1.000            | A                | 0.84%                  | 0.25                  | 0.35%              | 0.3               | 0.02%          | 0.79          | 0.17%                     | 0.47                     |
| 83  | 1   | DISC1  | rs2082552  | 229834513     | 251.58        | 0.14                   | 0.374            | A                | 0.00%                  | 0.93                  | 0.00%              | 0.9               | 0.23%          | 0.37          | 0.51%                     | 0.18                     |
| 84  | 1   | DISC1  | rs12084975 | 229846734     | 251.59        | 0.08                   | 1.000            | A                | 0.03%                  | 0.78                  | 0.26%              | 0.4               | 0.15%          | 0.55          | 0.04%                     | 0.75                     |
| 85  | 1   | DISC1  | rs1361519  | 229865965     |               | 0.00                   | 1.000            |                  |                        |                       |                    |                   |                |               |                           |                          |
| 86  | 1   | DISC1  | rs4366301  | 229872909     | 251.62        | 0.37                   | 0.119            | G                | 0.14%                  | 0.5                   | 0.07%              | 0.7               | 0.12%          | 0.52          | 0.23%                     | 0.37                     |
| 87  | 1   | DISC1  | rs6541281  | 229879757     | 251.63        | 0.49                   | 0.114            | C                | 0.25%                  | 0.36                  | 0.02%              | 0.8               | 0.00%          | 0.92          | 0.33%                     | 0.28                     |
| 88  | 1   | DISC1  | rs1417584  | 229885673     | 251.64        | 0.43                   | 0.035            | A                | 0.12%                  | 0.54                  | 0.11%              | 0.6               | 0.01%          | 0.83          | 0.30%                     | 0.3                      |
| 89  | 1   | DISC1  | rs3738401  | 229896918     | 251.65        | 0.30                   | 0.723            | G                | 0.06%                  | 0.67                  | 0.12%              | 0.6               | 0.21%          | 0.41          | 0.45%                     | 0.22                     |
| 90  | 1   | DISC1  | rs11122321 | 229902233     | 251.66        | 0.31                   | 0.308            | A                | 0.02%                  | 0.79                  | 0.12%              | 0.6               | 0.05%          | 0.68          | 0.33%                     | 0.28                     |
| 91  | 1   | DISC1  | rs1934909  | 229917902     | 251.68        | 0.15                   | 1.000            | G                | 0.06%                  | 0.69                  | 0.00%              | 0.9               | 0.27%          | 0.39          | 0.42%                     | 0.24                     |
| 92  | 1   | DISC1  | rs10495308 | 229946190     | 251.71        | 0.21                   | 0.833            | C                | 1.44%                  | 0.04                  | 0.81%              | 0.2               | 0.03%          | 0.76          | 0.01%                     | 0.85                     |
| 93  | 1   | DISC1  | rs2793092  | 229946963     | 251.72        | 0.28                   | 0.856            | T                | 0.31%                  | 0.34                  | 0.24%              | 0.4               | 0.12%          | 0.53          | 0.00%                     | 0.9                      |
| 94  | 1   | DISC1  | rs884158   | 229951395     | 251.72        | 0.01                   | 1.000            | A                | 0.01%                  | 0.88                  | 1.19%              | 0.08              | 0.08%          | 0.64          | 0.25%                     | 0.35                     |
| 95  | 1   | DISC1  | rs2793085  | 229966500     | 251.74        | 0.16                   | 1.000            | C                | 0.60%                  | 0.18                  | 0.12%              | 0.6               | 0.05%          | 0.69          | 0.21%                     | 0.41                     |
| 96  | 1   | DISC1  | rs3738402  | 229969633     | 251.74        | 0.04                   | 0.251            | C                | 0.30%                  | 0.32                  | 0.19%              | 0.5               | 1.85%          | 0.0072        | 0.22%                     | 0.4                      |
| 97  | 1   | DISC1  | rs2492367  | 229973212     | 251.75        | 0.13                   | 0.323            | C                | 0.08%                  | 0.64                  | 0.36%              | 0.3               | 0.05%          | 0.71          | 0.00%                     | 0.96                     |
| 98  | 1   | DISC1  | rs2812389  | 229977634     | 251.75        | 0.38                   | 0.044            | G                | 0.38%                  | 0.32                  | 0.16%              | 0.6               | 0.12%          | 0.56          | 0.21%                     | 0.43                     |
| 99  | 1   | DISC1  | rs10495310 | 229985399     | 251.76        | 0.13                   | 0.382            | A                | 0.29%                  | 0.35                  | 0.48%              | 0.2               | 0.97%          | 0.08          | 0.65%                     | 0.138                    |
| 100 | 1   | DISC1  | rs4658945  | 229985464     | 251.76        | 0.33                   | 0.041            | T                | 1.28%                  | 0.039                 | 0.00%              | 0.9               | 0.05%          | 0.67          | 0.12%                     | 0.5                      |

|     | Q                     | R                    | S                  | T                 | U              | V             | W              | X             | Y                 | Z                | AA                    | AB                   | AC                         | AD                        | AE                     | AF                    |
|-----|-----------------------|----------------------|--------------------|-------------------|----------------|---------------|----------------|---------------|-------------------|------------------|-----------------------|----------------------|----------------------------|---------------------------|------------------------|-----------------------|
| 1   | H2_Letter-Number Span | P_Letter-Number Span | H2_Verbal learning | P_Verbal learning | H2_Abstraction | P_Abstraction | H2_Face memory | P_Face memory | H2_Spatial memory | P_Spatial memory | H2_Spatial processing | P_Spatial processing | H2_Sensori-motor dexterity | P_Sensori-motor dexterity | H2_Emotion recognition | P_Emotion recognition |
| 68  | 0.14%                 | 0.5                  | 0.52%              | 0.16              | 0.03%          | 0.8           | 0.02%          | 0.8           | 0.19%             | 0.41             | 0.10%                 | 0.57                 | 1.88%                      | 0.01                      | 0.03%                  | 0.8                   |
| 69  | 0.02%                 | 0.8                  | 0.98%              | 0.055             | 0.07%          | 0.6           | 0.27%          | 0.3           | 0.21%             | 0.4              | 0.13%                 | 0.52                 | 0.07%                      | 0.6                       | 0.73%                  | 0.11                  |
| 70  | 0.45%                 | 0.2                  | 0.76%              | 0.08              | 0.08%          | 0.6           | 0.69%          | 0.11          | 1.19%             | 0.043            | 0.26%                 | 0.36                 | 2.87%                      | 0.0012                    | 3.08%                  | 0.0009                |
| 71  | 0.66%                 | 0.11                 | 0.59%              | 0.137             | 0.22%          | 0.4           | 0.21%          | 0.4           | 0.94%             | 0.073            | 0.29%                 | 0.33                 | 1.72%                      | 0.013                     | 1.54%                  | 0.02                  |
| 72  | 0.46%                 | 0.2                  | 0.24%              | 0.34              | 0.00%          | 1             | 0.01%          | 0.9           | 1.65%             | 0.0143           | 0.30%                 | 0.32                 | 0.00%                      | 0.9                       | 0.01%                  | 0.8                   |
| 73  | 0.03%                 | 0.7                  | 0.11%              | 0.53              | 0.00%          | 1             | 0.41%          | 0.2           | 0.08%             | 0.61             | 0.17%                 | 0.48                 | 0.26%                      | 0.4                       | 0.06%                  | 0.7                   |
| 74  | 0.24%                 | 0.4                  | 0.09%              | 0.57              | 0.10%          | 0.6           | 0.03%          | 0.7           | 2.10%             | 0.0093           | 0.35%                 | 0.31                 | 0.78%                      | 0.11                      | 0.17%                  | 0.5                   |
| 75  | 0.47%                 | 0.2                  | 0.01%              | 0.85              | 0.07%          | 0.6           | 0.45%          | 0.2           | 1.15%             | 0.053            | 0.05%                 | 0.72                 | 0.00%                      | 0.9                       | 0.35%                  | 0.3                   |
| 76  | 0.13%                 | 0.5                  | 0.28%              | 0.3               | 0.25%          | 0.3           | 0.11%          | 0.5           | 0.10%             | 0.55             | 0.19%                 | 0.43                 | 0.31%                      | 0.3                       | 0.40%                  | 0.2                   |
| 77  | 0.00%                 | 0.9                  | 0.28%              | 0.31              | 0.49%          | 0.2           | 0.19%          | 0.4           | 0.02%             | 0.79             | 0.25%                 | 0.38                 | 0.45%                      | 0.2                       | 0.66%                  | 0.13                  |
| 78  | 0.05%                 | 0.7                  | 0.75%              | 0.123             | 0.41%          | 0.3           | 0.18%          | 0.4           | 0.33%             | 0.32             | 0.00%                 | 0.97                 | 0.00%                      | 1                         | 0.01%                  | 0.9                   |
| 79  | 0.04%                 | 0.7                  | 0.06%              | 0.64              | 0.01%          | 0.9           | 0.05%          | 0.7           | 0.31%             | 0.29             | 0.16%                 | 0.47                 | 0.60%                      | 0.14                      | 0.20%                  | 0.4                   |
| 80  |                       |                      |                    |                   |                |               |                |               |                   |                  |                       |                      |                            |                           |                        |                       |
| 81  | 0.81%                 | 0.07                 | 0.04%              | 0.72              | 0.05%          | 0.6           | 0.26%          | 0.3           | 0.14%             | 0.49             | 0.02%                 | 0.78                 | 2.05%                      | 0.005                     | 0.16%                  | 0.4                   |
| 82  | 0.29%                 | 0.3                  | 0.00%              | 1                 | 0.41%          | 0.2           | 1.65%          | 0.01          | 0.11%             | 0.51             | 0.27%                 | 0.34                 | 0.28%                      | 0.3                       | 0.03%                  | 0.7                   |
| 83  | 0.00%                 | 0.9                  | 0.00%              | 0.98              | 0.87%          | 0.09          | 0.03%          | 0.7           | 0.82%             | 0.103            | 1.23%                 | 0.054                | 0.24%                      | 0.4                       | 0.00%                  | 0.9                   |
| 84  | 0.14%                 | 0.5                  | 0.77%              | 0.115             | 0.00%          | 1             | 0.00%          | 0.9           | 0.01%             | 0.89             | 0.16%                 | 0.53                 | 0.01%                      | 0.9                       | 0.00%                  | 1                     |
| 85  |                       |                      |                    |                   |                |               |                |               |                   |                  |                       |                      |                            |                           |                        |                       |
| 86  | 0.03%                 | 0.7                  | 0.52%              | 0.16              | 0.14%          | 0.5           | 0.23%          | 0.4           | 0.48%             | 0.2              | 0.00%                 | 0.92                 | 0.39%                      | 0.2                       | 0.07%                  | 0.6                   |
| 87  | 0.00%                 | 0.9                  | 0.36%              | 0.24              | 0.28%          | 0.3           | 0.05%          | 0.7           | 0.94%             | 0.072            | 0.01%                 | 0.87                 | 0.05%                      | 0.7                       | 0.00%                  | 1                     |
| 88  | 0.37%                 | 0.2                  | 0.57%              | 0.137             | 0.02%          | 0.8           | 0.50%          | 0.2           | 0.65%             | 0.138            | 0.02%                 | 0.79                 | 0.02%                      | 0.8                       | 0.00%                  | 1                     |
| 89  | 0.16%                 | 0.4                  | 0.49%              | 0.18              | 0.00%          | 1             | 0.00%          | 0.9           | 0.25%             | 0.37             | 0.45%                 | 0.25                 | 0.06%                      | 0.7                       | 0.07%                  | 0.6                   |
| 90  | 0.22%                 | 0.4                  | 0.59%              | 0.134             | 0.25%          | 0.3           | 0.05%          | 0.7           | 0.63%             | 0.146            | 0.08%                 | 0.62                 | 0.57%                      | 0.2                       | 0.02%                  | 0.8                   |
| 91  | 0.04%                 | 0.7                  | 0.02%              | 0.81              | 0.00%          | 1             | 0.18%          | 0.4           | 0.09%             | 0.6              | 0.01%                 | 0.9                  | 0.17%                      | 0.5                       | 0.00%                  | 1                     |
| 92  | 0.26%                 | 0.3                  | 0.39%              | 0.25              | 0.18%          | 0.4           | 0.49%          | 0.2           | 0.03%             | 0.77             | 0.10%                 | 0.59                 | 0.36%                      | 0.3                       | 0.95%                  | 0.08                  |
| 93  | 0.54%                 | 0.2                  | 0.11%              | 0.52              | 0.60%          | 0.2           | 0.19%          | 0.4           | 0.09%             | 0.59             | 0.10%                 | 0.58                 | 0.34%                      | 0.3                       | 0.40%                  | 0.3                   |
| 94  | 0.22%                 | 0.3                  | 0.10%              | 0.52              | 0.32%          | 0.3           | 0.83%          | 0.13          | 0.09%             | 0.62             | 0.48%                 | 0.25                 | 0.11%                      | 0.6                       | 0.00%                  | 0.9                   |
| 95  | 0.60%                 | 0.14                 | 0.47%              | 0.19              | 0.24%          | 0.4           | 0.01%          | 0.9           | 0.18%             | 0.45             | 0.05%                 | 0.69                 | 0.33%                      | 0.3                       | 0.28%                  | 0.3                   |
| 96  | 0.07%                 | 0.6                  | 0.09%              | 0.55              | 1.10%          | 0.03          | 0.20%          | 0.4           | 0.05%             | 0.67             | 0.48%                 | 0.19                 | 0.19%                      | 0.4                       | 0.04%                  | 0.7                   |
| 97  | 0.01%                 | 0.8                  | 0.05%              | 0.68              | 0.01%          | 0.9           | 0.22%          | 0.4           | 0.00%             | 0.93             | 0.28%                 | 0.37                 | 0.33%                      | 0.3                       | 0.02%                  | 0.8                   |
| 98  | 0.07%                 | 0.6                  | 0.82%              | 0.105             | 0.02%          | 0.8           | 0.12%          | 0.5           | 0.17%             | 0.48             | 0.00%                 | 0.93                 | 0.10%                      | 0.6                       | 0.03%                  | 0.8                   |
| 99  | 0.38%                 | 0.2                  | 1.17%              | 0.041             | 0.01%          | 0.8           | 0.01%          | 0.9           | 0.02%             | 0.83             | 0.04%                 | 0.73                 | 0.01%                      | 0.8                       | 0.00%                  | 0.9                   |
| 100 | 0.29%                 | 0.3                  | 1.15%              | 0.027             | 0.18%          | 0.4           | 0.02%          | 0.8           | 0.06%             | 0.63             | 0.00%                 | 0.91                 | 0.08%                      | 0.6                       | 0.17%                  | 0.5                   |

|     | A   | B     | C          | D             | E             | F                      | G                | H                | I                      | J                     | K                  | L                 | M              | N             | O                         | P                        |
|-----|-----|-------|------------|---------------|---------------|------------------------|------------------|------------------|------------------------|-----------------------|--------------------|-------------------|----------------|---------------|---------------------------|--------------------------|
| 1   | Chr | Gene  | SNP ID     | Position (bp) | Position (cM) | Minor allele frequency | Hardy-Weinberg P | Reference allele | H2_Prepulse inhibition | P_Prepulse inhibition | H2_P50 suppression | P_P50 suppression | H2_Antisaccade | P_Antisaccade | H2_Continuous performance | P_Continuous performance |
| 101 | 1   | DISC1 | rs11590192 | 229989468     | 251.77        | 0.45                   | 0.188            | T                | 0.52%                  | 0.23                  | 0.00%              | 0.9               | 0.20%          | 0.44          | 0.10%                     | 0.56                     |
| 102 | 1   | DISC1 | rs1322783  | 229995698     | 251.78        | 0.16                   | 1.000            | C                | 0.12%                  | 0.55                  | 0.49%              | 0.3               | 0.18%          | 0.44          | 0.17%                     | 0.45                     |
| 103 | 1   | DISC1 | rs2255340  | 230002773     | 251.78        | 0.26                   | 0.056            | G                | 0.01%                  | 0.88                  | 0.02%              | 0.8               | 0.11%          | 0.56          | 0.10%                     | 0.56                     |
| 104 | 1   | DISC1 | rs967244   | 230015269     | 251.80        | 0.23                   | 0.224            | A                | 0.36%                  | 0.29                  | 1.18%              | 0.06              | 0.06%          | 0.65          | 0.00%                     | 0.92                     |
| 105 | 1   | DISC1 | rs1000731  | 230030114     | 251.81        | 0.20                   | 1.000            | G                | 0.36%                  | 0.28                  | 1.39%              | 0.06              | 0.12%          | 0.53          | 0.13%                     | 0.5                      |
| 106 | 1   | DISC1 | rs6667141  | 230031254     | 251.81        | 0.25                   | 1.000            | G                | 0.66%                  | 0.15                  | 0.21%              | 0.4               | 0.49%          | 0.2           | 0.12%                     | 0.52                     |
| 107 | 1   | DISC1 | rs7551537  | 230038840     | 251.81        | 0.37                   | 1.000            | C                | 0.04%                  | 0.71                  | 2.62%              | 0.008             | 0.01%          | 0.89          | 0.01%                     | 0.88                     |
| 108 | 1   | DISC1 | rs12731570 | 230048561     | 251.81        | 0.22                   | 0.022            | G                | 1.07%                  | 0.078                 | 0.10%              | 0.6               | 0.02%          | 0.79          | 0.00%                     | 1                        |
| 109 | 1   | DISC1 | rs12090070 | 230051472     | 251.81        | 0.11                   | 0.142            | G                | 0.01%                  | 0.9                   | 0.04%              | 0.7               | 0.07%          | 0.62          | 0.08%                     | 0.61                     |
| 110 | 1   | DISC1 | rs748583   | 230059461     | 251.81        | 0.36                   | 0.040            | T                | 0.11%                  | 0.56                  | 0.14%              | 0.5               | 0.63%          | 0.148         | 1.40%                     | 0.027                    |
| 111 | 1   | DISC1 | rs3081     | 230068955     | 251.82        | 0.04                   | 0.312            | G                | 1.06%                  | 0.096                 | 0.00%              | 1                 | 2.16%          | 0.0076        | 1.74%                     | 0.0129                   |
| 112 | 1   | DISC1 | rs1015101  | 230074317     | 260.04        | 0.41                   | 0.452            | A                | 0.05%                  | 0.7                   | 0.50%              | 0.3               | 0.10%          | 0.57          | 0.92%                     | 0.078                    |
| 113 | 1   | DISC1 | rs7534369  | 230082857     | 260.04        | 0.41                   | 0.232            | T                | 0.00%                  | 0.92                  | 0.35%              | 0.3               | 0.76%          | 0.116         | 1.37%                     | 0.032                    |
| 114 | 1   | DISC1 | rs11122362 | 230086482     | 260.04        | 0.08                   | 0.609            | C                | 0.15%                  | 0.51                  | 0.09%              | 0.7               | 0.06%          | 0.68          | 0.09%                     | 0.6                      |
| 115 | 1   | DISC1 | rs1407599  | 230094534     | 260.04        | 0.35                   | 1.000            | C                | 0.23%                  | 0.39                  | 0.86%              | 0.13              | 0.07%          | 0.63          | 0.97%                     | 0.065                    |
| 116 | 1   | DISC1 | rs967433   | 230098438     | 260.64        | 0.41                   | 0.183            | T                | 0.01%                  | 0.88                  | 0.37%              | 0.3               | 0.24%          | 0.39          | 2.23%                     | 0.0076                   |
| 117 | 1   | DISC1 | rs11577215 | 230103529     | 260.64        | 0.08                   | 0.625            | C                | 0.00%                  | 0.95                  | 0.15%              | 0.5               | 0.11%          | 0.57          | 0.41%                     | 0.24                     |
| 118 | 1   | DISC1 | rs10864702 | 230117276     | 260.64        | 0.16                   | 0.580            | T                | 0.01%                  | 0.87                  | 0.01%              | 0.9               | 0.17%          | 0.47          | 0.14%                     | 0.48                     |
| 119 | 1   | DISC1 | rs2038636  | 230121872     | 260.64        | 0.44                   | 0.660            | T                | 0.45%                  | 0.23                  | 0.32%              | 0.3               | 0.01%          | 0.88          | 0.01%                     | 0.88                     |
| 120 | 1   | DISC1 | rs2356710  | 230133586     | 260.64        | 0.16                   | 0.792            | G                | 0.52%                  | 0.21                  | 0.06%              | 0.7               | 0.00%          | 0.98          | 0.04%                     | 0.71                     |
| 121 | 1   | DISC1 | rs821581   | 230143695     | 260.64        | 0.26                   | 0.345            | T                | 0.93%                  | 0.095                 | 0.15%              | 0.5               | 0.06%          | 0.67          | 0.11%                     | 0.54                     |
| 122 | 1   | DISC1 | rs821585   | 230154072     | 260.64        | 0.01                   | 1.000            | G                | 0.11%                  | 0.55                  | 0.22%              | 0.5               | 0.00%          | 0.97          | 0.44%                     | 0.23                     |
| 123 | 1   | DISC1 | rs2772122  | 230157116     | 260.64        | 0.27                   | 0.856            | A                | 0.62%                  | 0.19                  | 0.04%              | 0.8               | 0.19%          | 0.44          | 0.18%                     | 0.45                     |
| 124 | 1   | DISC1 | rs821597   | 230168887     | 260.64        | 0.37                   | 0.874            | C                | 0.11%                  | 0.59                  | 5.41%              | 0.0004            | 0.03%          | 0.75          | 0.05%                     | 0.71                     |
| 125 | 1   | DISC1 | rs12060283 | 230173702     | 260.64        | 0.06                   | 0.439            | G                | 0.20%                  | 0.48                  | 0.84%              | 0.2               | 0.32%          | 0.34          | 0.03%                     | 0.78                     |
| 126 | 1   | DISC1 | rs4658971  | 230174437     | 260.64        | 0.06                   | 1.000            | C                | 0.20%                  | 0.47                  | 0.84%              | 0.2               | 0.30%          | 0.35          | 0.02%                     | 0.79                     |
| 127 | 1   | DISC1 | rs821662   | 230187758     | 260.64        | 0.35                   | 0.871            | A                | 0.05%                  | 0.72                  | 3.57%              | 0.003             | 0.25%          | 0.38          | 0.16%                     | 0.48                     |
| 128 | 1   | DISC1 | rs843979   | 230197231     | 260.64        | 0.34                   | 1.000            | G                | 0.01%                  | 0.85                  | 3.38%              | 0.005             | 0.21%          | 0.43          | 0.03%                     | 0.76                     |
| 129 | 1   | DISC1 | rs821631   | 230214758     | 260.64        | 0.39                   | 0.643            | A                | 0.01%                  | 0.84                  | 0.30%              | 0.4               | 0.08%          | 0.62          | 0.06%                     | 0.66                     |
| 130 | 1   | DISC1 | rs821639   | 230216466     | 260.64        | 0.29                   | 0.481            | T                | 0.67%                  | 0.17                  | 0.06%              | 0.7               | 0.32%          | 0.34          | 0.01%                     | 0.89                     |
| 131 | 1   | DISC1 | rs3524     | 230225302     | 260.64        | 0.43                   | 0.376            | T                | 0.03%                  | 0.75                  | 0.61%              | 0.2               | 0.00%          | 0.97          | 0.09%                     | 0.57                     |
| 132 | 1   | DISC1 | rs1160491  | 230228516     | 260.64        | 0.36                   | 0.433            | A                | 0.01%                  | 0.86                  | 0.86%              | 0.13              | 0.01%          | 0.82          | 0.01%                     | 0.84                     |
| 133 | 1   | DISC1 | rs9726024  | 230235123     | 260.64        | 0.34                   | 0.873            | G                | 0.02%                  | 0.82                  | 0.00%              | 0.9               | 0.06%          | 0.66          | 0.04%                     | 0.7                      |

Association results and summary statistics for all 12 endophenotypes and 1,403 cleaned SNPs.

|     | Q                     | R                    | S                  | T                 | U              | V             | W              | X             | Y                 | Z                | AA                    | AB                   | AC                         | AD                        | AE                     | AF                    |
|-----|-----------------------|----------------------|--------------------|-------------------|----------------|---------------|----------------|---------------|-------------------|------------------|-----------------------|----------------------|----------------------------|---------------------------|------------------------|-----------------------|
| 1   | H2_Letter-Number Span | P_Letter-Number Span | H2_Verbal learning | P_Verbal learning | H2_Abstraction | P_Abstraction | H2_Face memory | P_Face memory | H2_Spatial memory | P_Spatial memory | H2_Spatial processing | P_Spatial processing | H2_Sensori-motor dexterity | P_Sensori-motor dexterity | H2_Emotion recognition | P_Emotion recognition |
| 101 | 0.00%                 | 1                    | 0.01%              | 0.87              | 0.26%          | 0.4           | 0.05%          | 0.7           | 0.09%             | 0.6              | 0.03%                 | 0.78                 | 0.04%                      | 0.7                       | 0.01%                  | 0.8                   |
| 102 | 0.63%                 | 0.13                 | 0.06%              | 0.65              | 0.59%          | 0.14          | 0.00%          | 0.9           | 0.11%             | 0.53             | 0.01%                 | 0.88                 | 0.73%                      | 0.11                      | 0.00%                  | 0.9                   |
| 103 | 0.08%                 | 0.6                  | 0.25%              | 0.34              | 0.29%          | 0.3           | 0.03%          | 0.7           | 0.04%             | 0.7              | 0.08%                 | 0.62                 | 0.08%                      | 0.6                       | 0.04%                  | 0.7                   |
| 104 | 1.04%                 | 0.05                 | 0.44%              | 0.2               | 0.14%          | 0.5           | 0.34%          | 0.3           | 0.01%             | 0.83             | 0.12%                 | 0.53                 | 0.93%                      | 0.07                      | 0.08%                  | 0.6                   |
| 105 | 0.56%                 | 0.2                  | 0.25%              | 0.35              | 0.17%          | 0.4           | 0.08%          | 0.6           | 0.04%             | 0.72             | 0.04%                 | 0.71                 | 0.00%                      | 1                         | 0.00%                  | 1                     |
| 106 | 0.14%                 | 0.5                  | 0.00%              | 0.96              | 0.01%          | 0.9           | 0.25%          | 0.3           | 0.28%             | 0.32             | 0.01%                 | 0.85                 | 0.02%                      | 0.8                       | 0.01%                  | 0.8                   |
| 107 | 0.01%                 | 0.8                  | 0.52%              | 0.17              | 0.38%          | 0.2           | 0.00%          | 1             | 0.01%             | 0.83             | 0.42%                 | 0.25                 | 0.54%                      | 0.2                       | 0.10%                  | 0.6                   |
| 108 | 2.86%                 | 0.002                | 0.01%              | 0.87              | 0.03%          | 0.8           | 0.73%          | 0.13          | 0.30%             | 0.34             | 0.01%                 | 0.87                 | 0.31%                      | 0.3                       | 0.57%                  | 0.2                   |
| 109 | 0.72%                 | 0.1                  | 0.02%              | 0.76              | 0.12%          | 0.5           | 0.77%          | 0.09          | 0.90%             | 0.074            | 0.00%                 | 0.99                 | 0.00%                      | 1                         | 0.05%                  | 0.7                   |
| 110 | 1.01%                 | 0.05                 | 0.01%              | 0.85              | 0.00%          | 1             | 0.05%          | 0.7           | 0.03%             | 0.76             | 0.38%                 | 0.26                 | 0.01%                      | 0.8                       | 0.25%                  | 0.3                   |
| 111 | 0.21%                 | 0.4                  | 0.06%              | 0.64              | 0.08%          | 0.6           | 0.04%          | 0.7           | 0.28%             | 0.33             | 1.18%                 | 0.065                | 0.00%                      | 0.9                       | 0.18%                  | 0.5                   |
| 112 | 0.21%                 | 0.4                  | 0.09%              | 0.57              | 0.34%          | 0.3           | 1.39%          | 0.03          | 0.27%             | 0.34             | 0.83%                 | 0.108                | 0.37%                      | 0.3                       | 0.65%                  | 0.13                  |
| 113 | 0.01%                 | 0.8                  | 0.72%              | 0.106             | 0.71%          | 0.11          | 0.52%          | 0.2           | 0.12%             | 0.53             | 0.40%                 | 0.27                 | 0.01%                      | 0.8                       | 0.09%                  | 0.6                   |
| 114 | 0.41%                 | 0.2                  | 0.32%              | 0.31              | 0.70%          | 0.1           | 0.12%          | 0.5           | 0.00%             | 0.94             | 0.05%                 | 0.72                 | 0.09%                      | 0.6                       | 0.40%                  | 0.3                   |
| 115 | 1.26%                 | 0.03                 | 0.01%              | 0.83              | 0.06%          | 0.7           | 0.06%          | 0.7           | 0.04%             | 0.69             | 1.53%                 | 0.024                | 0.61%                      | 0.14                      | 0.32%                  | 0.3                   |
| 116 | 0.00%                 | 0.9                  | 0.08%              | 0.59              | 0.10%          | 0.6           | 1.02%          | 0.06          | 0.62%             | 0.16             | 1.14%                 | 0.062                | 0.36%                      | 0.3                       | 1.58%                  | 0.02                  |
| 117 | 0.27%                 | 0.3                  | 0.09%              | 0.56              | 0.21%          | 0.4           | 0.04%          | 0.7           | 0.25%             | 0.38             | 0.39%                 | 0.28                 | 0.00%                      | 1                         | 0.17%                  | 0.4                   |
| 118 | 0.07%                 | 0.6                  | 0.10%              | 0.55              | 0.01%          | 0.8           | 0.39%          | 0.2           | 0.21%             | 0.4              | 0.00%                 | 0.98                 | 0.12%                      | 0.5                       | 0.01%                  | 0.9                   |
| 119 | 0.02%                 | 0.8                  | 0.17%              | 0.42              | 0.17%          | 0.4           | 0.53%          | 0.2           | 0.01%             | 0.89             | 0.98%                 | 0.092                | 0.07%                      | 0.6                       | 0.33%                  | 0.3                   |
| 120 | 1.05%                 | 0.05                 | 0.02%              | 0.81              | 0.13%          | 0.5           | 0.19%          | 0.4           | 0.00%             | 0.97             | 0.10%                 | 0.58                 | 0.03%                      | 0.8                       | 0.01%                  | 0.9                   |
| 121 | 0.91%                 | 0.08                 | 0.26%              | 0.34              | 0.32%          | 0.3           | 0.28%          | 0.3           | 0.06%             | 0.67             | 0.42%                 | 0.27                 | 0.14%                      | 0.5                       | 0.07%                  | 0.6                   |
| 122 | 0.01%                 | 0.9                  | 0.54%              | 0.17              | 0.00%          | 1             | 0.27%          | 0.3           | 1.40%             | 0.038            | 1.83%                 | 0.02                 | 1.01%                      | 0.08                      | 0.00%                  | 0.9                   |
| 123 | 0.01%                 | 0.8                  | 0.06%              | 0.64              | 0.00%          | 0.9           | 0.30%          | 0.3           | 0.09%             | 0.59             | 0.49%                 | 0.22                 | 0.06%                      | 0.7                       | 1.00%                  | 0.08                  |
| 124 | 0.91%                 | 0.08                 | 0.44%              | 0.23              | 0.87%          | 0.09          | 1.28%          | 0.04          | 0.16%             | 0.48             | 1.22%                 | 0.062                | 1.21%                      | 0.05                      | 1.00%                  | 0.07                  |
| 125 | 0.00%                 | 1                    | 0.02%              | 0.81              | 0.58%          | 0.2           | 1.02%          | 0.07          | 0.17%             | 0.47             | 0.00%                 | 0.99                 | 0.00%                      | 0.9                       | 0.06%                  | 0.7                   |
| 126 | 0.01%                 | 0.8                  | 0.02%              | 0.81              | 0.02%          | 0.8           | 0.30%          | 0.3           | 0.19%             | 0.46             | 0.01%                 | 0.9                  | 0.05%                      | 0.7                       | 0.36%                  | 0.3                   |
| 127 | 0.36%                 | 0.3                  | 0.13%              | 0.51              | 0.02%          | 0.8           | 0.13%          | 0.5           | 0.11%             | 0.56             | 0.53%                 | 0.21                 | 0.12%                      | 0.5                       | 0.51%                  | 0.2                   |
| 128 | 0.05%                 | 0.7                  | 0.29%              | 0.33              | 0.16%          | 0.5           | 0.38%          | 0.3           | 0.08%             | 0.62             | 0.47%                 | 0.25                 | 0.89%                      | 0.11                      | 0.00%                  | 1                     |
| 129 | 1.40%                 | 0.02                 | 0.00%              | 0.93              | 0.00%          | 0.9           | 0.00%          | 1             | 0.02%             | 0.81             | 0.05%                 | 0.7                  | 0.31%                      | 0.3                       | 0.06%                  | 0.7                   |
| 130 | 0.55%                 | 0.2                  | 0.12%              | 0.54              | 0.60%          | 0.14          | 0.71%          | 0.11          | 0.10%             | 0.59             | 0.32%                 | 0.36                 | 0.31%                      | 0.3                       | 0.03%                  | 0.8                   |
| 131 | 0.00%                 | 1                    | 0.03%              | 0.73              | 0.00%          | 1             | 0.76%          | 0.12          | 0.01%             | 0.88             | 0.47%                 | 0.23                 | 0.11%                      | 0.6                       | 0.17%                  | 0.5                   |
| 132 | 0.01%                 | 0.9                  | 0.33%              | 0.28              | 0.07%          | 0.6           | 0.02%          | 0.8           | 0.24%             | 0.38             | 0.02%                 | 0.83                 | 0.20%                      | 0.4                       | 0.10%                  | 0.5                   |
| 133 | 0.08%                 | 0.6                  | 0.02%              | 0.77              | 0.01%          | 0.8           | 0.06%          | 0.6           | 1.71%             | 0.016            | 0.01%                 | 0.85                 | 0.17%                      | 0.4                       | 0.00%                  | 1                     |



|     | A   | B      | C          | D             | E             | F                      | G                | H                | I                      | J                     | K                  | L                 | M              | N             | O                         | P                        |
|-----|-----|--------|------------|---------------|---------------|------------------------|------------------|------------------|------------------------|-----------------------|--------------------|-------------------|----------------|---------------|---------------------------|--------------------------|
| 1   | Chr | Gene   | SNP ID     | Position (bp) | Position (cM) | Minor allele frequency | Hardy-Weinberg P | Reference allele | H2_Prepulse inhibition | P_Prepulse inhibition | H2_P50 suppression | P_P50 suppression | H2_Antisaccade | P_Antisaccade | H2_Continuous performance | P_Continuous performance |
| 134 | 1   | DISC1  | rs11122396 | 230241891     | 260.64        | 0.03                   | 1.000            | A                | 0.23%                  | 0.34                  | 0.40%              | 0.3               | 0.02%          | 0.79          | 0.05%                     | 0.69                     |
| 135 | 1   | DISC1  | rs14111775 | 230243925     | 260.64        | 0.12                   | 0.206            | G                | 0.36%                  | 0.27                  | 0.30%              | 0.4               | 1.23%          | 0.038         | 0.00%                     | 0.96                     |
| 136 | 1   | DISC1  | rs9727641  | 230246966     | 260.64        | 0.31                   | 0.499            | C                | 0.72%                  | 0.125                 | 0.00%              | 0.9               | 0.56%          | 0.17          | 0.13%                     | 0.51                     |
| 137 | 2   | CTNNA2 | rs4852150  | 79591630      | 104.82        | 0.38                   | 0.441            | C                | 0.12%                  | 0.54                  | 0.11%              | 0.6               | 0.07%          | 0.64          | 0.19%                     | 0.42                     |
| 138 | 2   | CTNNA2 | rs10206130 | 79604099      | 104.84        | 0.34                   | 0.630            | T                | 0.07%                  | 0.64                  | 0.86%              | 0.12              | 0.16%          | 0.47          | 1.77%                     | 0.0125                   |
| 139 | 2   | CTNNA2 | rs6719738  | 79613746      | 104.85        | 0.28                   | 1.000            | C                | 0.19%                  | 0.43                  | 0.93%              | 0.1               | 0.01%          | 0.86          | 0.94%                     | 0.068                    |
| 140 | 2   | CTNNA2 | rs10520244 | 79614280      | 104.85        | 0.10                   | 0.699            | C                | 0.83%                  | 0.126                 | 0.52%              | 0.2               | 0.15%          | 0.49          | 0.25%                     | 0.36                     |
| 141 | 2   | CTNNA2 | rs1864551  | 79620045      | 104.87        | 0.18                   | 0.145            | G                | 0.03%                  | 0.78                  | 0.26%              | 0.4               | 0.55%          | 0.18          | 2.57%                     | 0.0033                   |
| 142 | 2   | CTNNA2 | rs6716273  | 79622239      | 104.87        | 0.49                   | 0.662            | G                | 0.37%                  | 0.29                  | 0.00%              | 1                 | 0.14%          | 0.5           | 0.02%                     | 0.79                     |
| 143 | 2   | CTNNA2 | rs1367399  | 79627566      | 104.88        | 0.34                   | 1.000            | T                | 0.00%                  | 0.91                  | 0.03%              | 0.8               | 0.00%          | 0.98          | 1.99%                     | 0.0115                   |
| 144 | 2   | CTNNA2 | rs880813   | 79629799      | 104.89        | 0.38                   | 1.000            | A                | 0.10%                  | 0.57                  | 0.17%              | 0.5               | 0.20%          | 0.41          | 2.67%                     | 0.0023                   |
| 145 | 2   | CTNNA2 | rs2566540  | 79639901      | 104.91        | 0.29                   | 0.486            | T                | 0.12%                  | 0.56                  | 0.61%              | 0.2               | 0.14%          | 0.51          | 1.18%                     | 0.05                     |
| 146 | 2   | CTNNA2 | rs1971766  | 79644485      | 104.92        | 0.44                   | 0.662            | G                | 0.01%                  | 0.87                  | 0.27%              | 0.4               | 0.01%          | 0.85          | 2.26%                     | 0.0068                   |
| 147 | 2   | CTNNA2 | rs2566543  | 79651698      | 104.93        | 0.20                   | 1.000            | G                | 0.66%                  | 0.17                  | 0.02%              | 0.8               | 0.07%          | 0.63          | 0.56%                     | 0.17                     |
| 148 | 2   | CTNNA2 | rs1549761  | 79664592      | 104.96        | 0.26                   | 1.000            | T                | 0.69%                  | 0.149                 | 0.16%              | 0.5               | 0.34%          | 0.29          | 0.45%                     | 0.21                     |
| 149 | 2   | CTNNA2 | rs1430645  | 79666704      | 104.96        | 0.28                   | 0.283            | T                | 0.73%                  | 0.131                 | 0.01%              | 0.9               | 0.10%          | 0.57          | 0.67%                     | 0.124                    |
| 150 | 2   | CTNNA2 | rs1549765  | 79670651      | 104.97        | 0.20                   | 1.000            | C                | 0.62%                  | 0.18                  | 0.00%              | 1                 | 0.11%          | 0.55          | 0.61%                     | 0.15                     |
| 151 | 2   | CTNNA2 | rs6750164  | 79676126      | 104.98        | 0.36                   | 0.434            | A                | 0.27%                  | 0.38                  | 0.01%              | 0.9               | 0.30%          | 0.33          | 1.08%                     | 0.057                    |
| 152 | 2   | CTNNA2 | rs2566552  | 79684589      | 105.00        | 0.23                   | 0.154            | A                | 0.58%                  | 0.19                  | 0.07%              | 0.7               | 0.00%          | 0.95          | 0.81%                     | 0.1                      |
| 153 | 2   | CTNNA2 | rs4852153  | 79713047      | 105.06        | 0.38                   | 0.761            | G                | 0.52%                  | 0.23                  | 0.37%              | 0.3               | 0.08%          | 0.62          | 0.40%                     | 0.26                     |
| 154 | 2   | CTNNA2 | rs13400937 | 79718431      | 105.08        | 0.36                   | 0.274            | T                | 0.42%                  | 0.29                  | 0.37%              | 0.3               | 0.15%          | 0.5           | 0.31%                     | 0.32                     |
| 155 | 2   | CTNNA2 | rs1430642  | 79721176      | 105.08        | 0.50                   | 0.773            | T                | 0.03%                  | 0.76                  | 1.58%              | 0.05              | 0.16%          | 0.48          | 0.39%                     | 0.27                     |
| 156 | 2   | CTNNA2 | rs3795994  | 79726512      | 105.09        | 0.36                   | 0.877            | C                | 0.01%                  | 0.88                  | 0.35%              | 0.4               | 0.00%          | 0.91          | 0.06%                     | 0.65                     |
| 157 | 2   | CTNNA2 | rs1511198  | 79737953      | 105.12        | 0.26                   | 0.698            | C                | 1.43%                  | 0.052                 | 0.38%              | 0.3               | 0.40%          | 0.29          | 0.16%                     | 0.49                     |
| 158 | 2   | CTNNA2 | rs2861854  | 79743608      | 105.13        | 0.45                   | 0.245            | T                | 1.04%                  | 0.07                  | 0.20%              | 0.5               | 0.11%          | 0.55          | 0.28%                     | 0.32                     |
| 159 | 2   | CTNNA2 | rs1567529  | 79745765      |               | 0.00                   | 1.000            |                  |                        |                       |                    |                   |                |               |                           |                          |
| 160 | 2   | CTNNA2 | rs2861857  | 79759614      | 105.16        | 0.46                   | 0.309            | C                | 0.07%                  | 0.64                  | 2.05%              | 0.02              | 0.18%          | 0.46          | 0.12%                     | 0.53                     |
| 161 | 2   | CTNNA2 | rs4258819  | 79760823      | 105.17        | 0.32                   | 0.132            | G                | 0.02%                  | 0.8                   | 0.99%              | 0.11              | 0.05%          | 0.69          | 0.11%                     | 0.54                     |
| 162 | 2   | CTNNA2 | rs6729255  | 79771489      | 105.19        | 0.34                   | 0.508            | C                | 0.25%                  | 0.37                  | 0.66%              | 0.2               | 0.41%          | 0.24          | 0.03%                     | 0.75                     |
| 163 | 2   | CTNNA2 | rs6547259  | 79779235      | 105.20        | 0.22                   | 1.000            | G                | 0.28%                  | 0.35                  | 0.02%              | 0.8               | 0.74%          | 0.124         | 1.15%                     | 0.058                    |
| 164 | 2   | CTNNA2 | rs1397693  | 79788862      | 105.23        | 0.23                   | 0.681            | C                | 0.05%                  | 0.69                  | 0.01%              | 0.9               | 1.23%          | 0.048         | 0.00%                     | 0.92                     |
| 165 | 2   | CTNNA2 | rs11689331 | 79802429      | 105.25        | 0.20                   | 1.000            | G                | 0.05%                  | 0.7                   | 0.14%              | 0.5               | 0.32%          | 0.31          | 0.00%                     | 0.9                      |
| 166 | 2   | CTNNA2 | rs1397690  | 79805149      | 105.26        | 0.18                   | 0.806            | C                | 0.05%                  | 0.71                  | 0.09%              | 0.6               | 0.28%          | 0.35          | 0.04%                     | 0.72                     |

|     | Q                     | R                    | S                  | T                 | U              | V             | W              | X             | Y                 | Z                | AA                    | AB                   | AC                         | AD                        | AE                     | AF                    |
|-----|-----------------------|----------------------|--------------------|-------------------|----------------|---------------|----------------|---------------|-------------------|------------------|-----------------------|----------------------|----------------------------|---------------------------|------------------------|-----------------------|
| 1   | H2_Letter-Number Span | P_Letter-Number Span | H2_Verbal learning | P_Verbal learning | H2_Abstraction | P_Abstraction | H2_Face memory | P_Face memory | H2_Spatial memory | P_Spatial memory | H2_Spatial processing | P_Spatial processing | H2_Sensori-motor dexterity | P_Sensori-motor dexterity | H2_Emotion recognition | P_Emotion recognition |
| 134 | 0.11%                 | 0.5                  | 0.00%              | 0.96              | 0.33%          | 0.3           | 0.15%          | 0.5           | 0.09%             | 0.6              | 0.04%                 | 0.75                 | 0.53%                      | 0.2                       | 0.08%                  | 0.6                   |
| 135 | 0.00%                 | 0.9                  | 0.12%              | 0.49              | 0.02%          | 0.8           | 0.01%          | 0.8           | 0.43%             | 0.21             | 0.00%                 | 0.95                 | 0.00%                      | 1                         | 0.01%                  | 0.8                   |
| 136 | 0.41%                 | 0.2                  | 0.10%              | 0.54              | 0.84%          | 0.08          | 0.04%          | 0.7           | 0.12%             | 0.53             | 0.07%                 | 0.65                 | 0.00%                      | 0.9                       | 0.02%                  | 0.8                   |
| 137 | 0.31%                 | 0.3                  | 0.87%              | 0.069             | 0.01%          | 0.9           | 0.06%          | 0.6           | 0.59%             | 0.15             | 0.03%                 | 0.78                 | 0.03%                      | 0.7                       | 0.00%                  | 1                     |
| 138 | 0.76%                 | 0.09                 | 0.14%              | 0.47              | 0.00%          | 1             | 0.00%          | 0.9           | 1.15%             | 0.052            | 1.02%                 | 0.079                | 0.08%                      | 0.6                       | 0.02%                  | 0.8                   |
| 139 | 0.59%                 | 0.13                 | 0.30%              | 0.28              | 0.02%          | 0.8           | 0.01%          | 0.9           | 0.94%             | 0.071            | 0.65%                 | 0.15                 | 0.23%                      | 0.4                       | 0.27%                  | 0.4                   |
| 140 | 0.00%                 | 1                    | 0.01%              | 0.88              | 0.05%          | 0.7           | 0.21%          | 0.4           | 0.04%             | 0.74             | 0.54%                 | 0.24                 | 0.22%                      | 0.4                       | 0.02%                  | 0.8                   |
| 141 | 0.11%                 | 0.5                  | 0.09%              | 0.56              | 0.01%          | 0.8           | 0.22%          | 0.4           | 0.22%             | 0.39             | 0.91%                 | 0.085                | 0.09%                      | 0.6                       | 0.02%                  | 0.8                   |
| 142 | 0.27%                 | 0.3                  | 0.20%              | 0.39              | 0.00%          | 1             | 0.01%          | 0.9           | 0.15%             | 0.48             | 0.03%                 | 0.75                 | 0.00%                      | 0.9                       | 0.02%                  | 0.8                   |
| 143 | 1.00%                 | 0.06                 | 0.15%              | 0.48              | 0.01%          | 0.8           | 0.00%          | 1             | 0.83%             | 0.109            | 0.18%                 | 0.48                 | 0.06%                      | 0.7                       | 0.06%                  | 0.7                   |
| 144 | 0.57%                 | 0.14                 | 0.06%              | 0.63              | 0.39%          | 0.2           | 0.00%          | 1             | 1.71%             | 0.015            | 0.23%                 | 0.39                 | 0.14%                      | 0.5                       | 0.05%                  | 0.7                   |
| 145 | 0.09%                 | 0.6                  | 0.28%              | 0.32              | 0.14%          | 0.5           | 0.03%          | 0.7           | 1.01%             | 0.078            | 0.20%                 | 0.45                 | 0.44%                      | 0.2                       | 0.17%                  | 0.5                   |
| 146 | 0.81%                 | 0.09                 | 0.28%              | 0.32              | 0.06%          | 0.7           | 0.06%          | 0.7           | 1.52%             | 0.031            | 0.50%                 | 0.24                 | 0.00%                      | 1                         | 0.18%                  | 0.5                   |
| 147 | 0.14%                 | 0.5                  | 0.12%              | 0.52              | 0.08%          | 0.6           | 0.18%          | 0.4           | 0.29%             | 0.35             | 0.02%                 | 0.79                 | 0.06%                      | 0.7                       | 0.41%                  | 0.3                   |
| 148 | 0.49%                 | 0.2                  | 0.03%              | 0.75              | 0.10%          | 0.5           | 0.11%          | 0.5           | 0.27%             | 0.34             | 0.10%                 | 0.57                 | 0.02%                      | 0.8                       | 0.88%                  | 0.08                  |
| 149 | 0.13%                 | 0.5                  | 0.10%              | 0.53              | 0.27%          | 0.3           | 0.04%          | 0.7           | 0.13%             | 0.51             | 0.00%                 | 0.96                 | 0.21%                      | 0.4                       | 0.57%                  | 0.2                   |
| 150 | 0.29%                 | 0.3                  | 0.17%              | 0.44              | 0.13%          | 0.5           | 0.24%          | 0.4           | 0.44%             | 0.24             | 0.07%                 | 0.65                 | 0.10%                      | 0.6                       | 0.52%                  | 0.2                   |
| 151 | 0.63%                 | 0.13                 | 0.14%              | 0.47              | 0.04%          | 0.7           | 0.13%          | 0.5           | 0.19%             | 0.44             | 0.04%                 | 0.72                 | 0.02%                      | 0.8                       | 0.49%                  | 0.2                   |
| 152 | 0.06%                 | 0.7                  | 0.10%              | 0.55              | 0.05%          | 0.7           | 0.19%          | 0.4           | 0.18%             | 0.46             | 0.01%                 | 0.87                 | 0.06%                      | 0.7                       | 0.51%                  | 0.2                   |
| 153 | 0.07%                 | 0.6                  | 0.01%              | 0.83              | 0.36%          | 0.3           | 0.01%          | 0.8           | 0.12%             | 0.54             | 0.30%                 | 0.35                 | 0.10%                      | 0.6                       | 0.05%                  | 0.7                   |
| 154 | 0.22%                 | 0.4                  | 0.30%              | 0.31              | 0.04%          | 0.7           | 0.05%          | 0.7           | 0.05%             | 0.69             | 0.21%                 | 0.43                 | 0.08%                      | 0.6                       | 0.35%                  | 0.3                   |
| 155 | 0.01%                 | 0.9                  | 0.18%              | 0.44              | 0.16%          | 0.5           | 0.21%          | 0.4           | 0.18%             | 0.45             | 0.05%                 | 0.71                 | 0.83%                      | 0.1                       | 0.91%                  | 0.09                  |
| 156 | 0.00%                 | 1                    | 0.24%              | 0.35              | 0.08%          | 0.6           | 0.10%          | 0.6           | 0.03%             | 0.75             | 0.23%                 | 0.4                  | 1.56%                      | 0.02                      | 0.37%                  | 0.3                   |
| 157 | 0.20%                 | 0.4                  | 0.04%              | 0.71              | 0.12%          | 0.5           | 0.03%          | 0.8           | 0.00%             | 0.93             | 0.03%                 | 0.76                 | 0.11%                      | 0.6                       | 0.18%                  | 0.5                   |
| 158 | 0.13%                 | 0.5                  | 0.48%              | 0.18              | 0.02%          | 0.8           | 0.49%          | 0.2           | 0.03%             | 0.73             | 0.66%                 | 0.15                 | 1.31%                      | 0.03                      | 0.00%                  | 1                     |
| 159 |                       |                      |                    |                   |                |               |                |               |                   |                  |                       |                      |                            |                           |                        |                       |
| 160 | 0.00%                 | 0.9                  | 0.00%              | 0.92              | 0.12%          | 0.5           | 0.41%          | 0.2           | 0.04%             | 0.72             | 1.14%                 | 0.066                | 0.12%                      | 0.5                       | 0.15%                  | 0.5                   |
| 161 | 0.01%                 | 0.9                  | 0.06%              | 0.64              | 0.41%          | 0.2           | 0.22%          | 0.4           | 0.33%             | 0.29             | 0.41%                 | 0.26                 | 0.03%                      | 0.8                       | 0.35%                  | 0.3                   |
| 162 | 0.26%                 | 0.3                  | 0.75%              | 0.094             | 2.01%          | 0.008         | 0.08%          | 0.6           | 0.57%             | 0.17             | 0.28%                 | 0.36                 | 1.36%                      | 0.03                      | 1.23%                  | 0.04                  |
| 163 | 0.74%                 | 0.11                 | 0.94%              | 0.069             | 0.72%          | 0.12          | 0.14%          | 0.5           | 0.00%             | 0.95             | 0.45%                 | 0.25                 | 0.17%                      | 0.5                       | 0.76%                  | 0.11                  |
| 164 | 0.16%                 | 0.5                  | 0.06%              | 0.65              | 0.07%          | 0.6           | 0.01%          | 0.8           | 0.01%             | 0.88             | 0.19%                 | 0.45                 | 0.08%                      | 0.6                       | 0.58%                  | 0.2                   |
| 165 | 0.61%                 | 0.14                 | 0.23%              | 0.36              | 0.00%          | 1             | 0.06%          | 0.6           | 0.06%             | 0.65             | 1.06%                 | 0.069                | 0.59%                      | 0.2                       | 0.09%                  | 0.6                   |
| 166 | 0.37%                 | 0.3                  | 0.40%              | 0.25              | 0.05%          | 0.7           | 0.11%          | 0.5           | 0.11%             | 0.56             | 1.01%                 | 0.084                | 0.43%                      | 0.2                       | 0.03%                  | 0.7                   |

|     | A   | B      | C          | D             | E             | F                      | G                | H                | I                      | J                     | K                  | L                 | M              | N             | O                         | P                        |
|-----|-----|--------|------------|---------------|---------------|------------------------|------------------|------------------|------------------------|-----------------------|--------------------|-------------------|----------------|---------------|---------------------------|--------------------------|
| 1   | Chr | Gene   | SNP ID     | Position (bp) | Position (cM) | Minor allele frequency | Hardy-Weinberg P | Reference allele | H2_Prepulse inhibition | P_Prepulse inhibition | H2_P50 suppression | P_P50 suppression | H2_Antisaccade | P_Antisaccade | H2_Continuous performance | P_Continuous performance |
| 167 | 2   | CTNNA2 | rs4852514  | 79807254      | 105.26        | 0.04                   | 0.189            | T                | 0.91%                  | 0.082                 | 0.03%              | 0.8               | 0.57%          | 0.2           | 0.78%                     | 0.089                    |
| 168 | 2   | CTNNA2 | rs7565439  | 79816822      | 105.28        | 0.25                   | 0.849            | G                | 0.06%                  | 0.67                  | 0.09%              | 0.6               | 0.07%          | 0.62          | 0.08%                     | 0.62                     |
| 169 | 2   | CTNNA2 | rs11681484 | 79821666      | 105.30        | 0.42                   | 0.234            | G                | 0.21%                  | 0.45                  | 0.54%              | 0.2               | 0.43%          | 0.26          | 0.02%                     | 0.8                      |
| 170 | 2   | CTNNA2 | rs925404   | 79836197      | 105.33        | 0.38                   | 0.218            | T                | 0.31%                  | 0.34                  | 0.00%              | 1                 | 0.00%          | 0.95          | 0.09%                     | 0.58                     |
| 171 | 2   | CTNNA2 | rs971476   | 79842175      | 105.34        | 0.15                   | 0.772            | T                | 0.67%                  | 0.16                  | 0.15%              | 0.5               | 0.60%          | 0.18          | 0.19%                     | 0.43                     |
| 172 | 2   | CTNNA2 | rs12713991 | 79844837      | 105.34        | 0.42                   | 0.184            | G                | 0.03%                  | 0.76                  | 0.17%              | 0.5               | 0.27%          | 0.35          | 0.72%                     | 0.123                    |
| 173 | 2   | CTNNA2 | rs1397696  | 79850281      | 105.36        | 0.35                   | 0.157            | G                | 0.23%                  | 0.39                  | 0.01%              | 0.9               | 0.91%          | 0.075         | 0.26%                     | 0.32                     |
| 174 | 2   | CTNNA2 | rs1159457  | 79855782      | 105.37        | 0.06                   | 1.000            | A                | 0.13%                  | 0.53                  | 0.00%              | 0.9               | 0.76%          | 0.126         | 0.19%                     | 0.42                     |
| 175 | 2   | CTNNA2 | rs10496232 | 79857271      | 105.37        | 0.08                   | 0.317            | G                | 0.09%                  | 0.59                  | 0.03%              | 0.8               | 0.15%          | 0.47          | 0.06%                     | 0.63                     |
| 176 | 2   | CTNNA2 | rs2102547  | 79893363      | 105.45        | 0.45                   | 0.468            | G                | 0.23%                  | 0.39                  | 0.29%              | 0.4               | 0.43%          | 0.23          | 0.61%                     | 0.143                    |
| 177 | 2   | CTNNA2 | rs1001112  | 79894431      | 105.45        | 0.48                   | 0.147            | C                | 0.39%                  | 0.28                  | 0.00%              | 1                 | 0.07%          | 0.64          | 0.48%                     | 0.21                     |
| 178 | 2   | CTNNA2 | rs6734305  | 79908334      | 105.48        | 0.45                   | 0.380            | C                | 0.04%                  | 0.72                  | 0.03%              | 0.8               | 0.00%          | 0.99          | 0.02%                     | 0.8                      |
| 179 | 2   | CTNNA2 | rs2203051  | 79913587      | 105.49        | 0.38                   | 0.163            | G                | 0.05%                  | 0.7                   | 0.00%              | 1                 | 0.06%          | 0.66          | 0.00%                     | 0.96                     |
| 180 | 2   | CTNNA2 | rs2974154  | 79935364      | 105.54        | 0.18                   | 0.217            | A                | 0.25%                  | 0.39                  | 0.10%              | 0.6               | 0.28%          | 0.34          | 1.08%                     | 0.054                    |
| 181 | 2   | CTNNA2 | rs10496233 | 79935726      | 105.54        | 0.26                   | 0.718            | T                | 0.33%                  | 0.31                  | 0.00%              | 0.9               | 0.31%          | 0.32          | 0.22%                     | 0.39                     |
| 182 | 2   | CTNNA2 | rs13430537 | 79963829      | 105.60        | 0.29                   | 0.286            | A                | 0.23%                  | 0.41                  | 0.00%              | 1                 | 0.20%          | 0.43          | 0.23%                     | 0.38                     |
| 183 | 2   | CTNNA2 | rs13414270 | 79968069      | 105.61        | 0.34                   | 0.072            | T                | 0.53%                  | 0.2                   | 0.00%              | 0.9               | 0.01%          | 0.84          | 0.01%                     | 0.83                     |
| 184 | 2   | CTNNA2 | rs989743   | 79970788      | 105.61        | 0.20                   | 0.260            | C                | 0.02%                  | 0.79                  | 0.31%              | 0.4               | 0.07%          | 0.64          | 0.11%                     | 0.54                     |
| 185 | 2   | CTNNA2 | rs13034462 | 79973002      | 105.62        | 0.04                   | 0.247            | T                | 0.00%                  | 1                     | 0.00%              | 0.9               | 0.01%          | 0.88          | 1.12%                     | 0.068                    |
| 186 | 2   | CTNNA2 | rs10496234 | 79973743      | 105.62        | 0.50                   | 0.663            | T                | 0.20%                  | 0.45                  | 0.05%              | 0.7               | 0.02%          | 0.81          | 0.05%                     | 0.69                     |
| 187 | 2   | CTNNA2 | rs2974173  | 79975239      | 105.62        | 0.27                   | 0.206            | C                | 0.00%                  | 0.93                  | 0.01%              | 0.9               | 0.01%          | 0.86          | 0.00%                     | 1                        |
| 188 | 2   | CTNNA2 | rs974736   | 80019524      | 105.72        | 0.09                   | 0.672            | G                | 0.08%                  | 0.65                  | 0.74%              | 0.2               | 0.33%          | 0.34          | 0.10%                     | 0.58                     |
| 189 | 2   | CTNNA2 | rs540905   | 80066801      | 105.82        | 0.29                   | 0.113            | C                | 1.87%                  | 0.015                 | 0.04%              | 0.7               | 0.41%          | 0.25          | 0.71%                     | 0.125                    |
| 190 | 2   | CTNNA2 | rs482602   | 80081198      | 105.85        | 0.15                   | 0.775            | C                | 0.14%                  | 0.53                  | 0.10%              | 0.6               | 0.19%          | 0.45          | 0.01%                     | 0.84                     |
| 191 | 2   | CTNNA2 | rs1368909  | 80082251      | 105.85        | 0.42                   | 0.375            | T                | 0.01%                  | 0.89                  | 0.25%              | 0.4               | 0.33%          | 0.31          | 0.13%                     | 0.52                     |
| 192 | 2   | CTNNA2 | rs1434099  | 80082649      | 105.85        | 0.50                   | 0.147            | T                | 0.19%                  | 0.45                  | 0.00%              | 1                 | 0.04%          | 0.71          | 0.12%                     | 0.52                     |
| 193 | 2   | CTNNA2 | rs417570   | 80086053      | 105.86        | 0.30                   | 0.734            | G                | 1.31%                  | 0.057                 | 0.22%              | 0.5               | 0.50%          | 0.21          | 0.38%                     | 0.27                     |
| 194 | 2   | CTNNA2 | rs450658   | 80089547      | 105.87        | 0.35                   | 0.634            | G                | 0.93%                  | 0.105                 | 0.02%              | 0.8               | 0.68%          | 0.148         | 0.41%                     | 0.25                     |
| 195 | 2   | CTNNA2 | rs427295   | 80092085      | 105.87        | 0.15                   | 1.000            | A                | 0.23%                  | 0.41                  | 0.17%              | 0.5               | 0.47%          | 0.22          | 0.01%                     | 0.83                     |
| 196 | 2   | CTNNA2 | rs921637   | 80112935      | 105.92        | 0.48                   | 1.000            | G                | 0.04%                  | 0.72                  | 0.40%              | 0.3               | 0.00%          | 0.94          | 0.00%                     | 0.97                     |
| 197 | 2   | CTNNA2 | rs6729700  | 80114681      | 105.92        | 0.50                   | 0.563            | C                | 0.01%                  | 0.9                   | 0.80%              | 0.2               | 0.09%          | 0.6           | 0.00%                     | 0.93                     |
| 198 | 2   | CTNNA2 | rs1812391  | 80132155      | 105.96        | 0.25                   | 0.705            | A                | 0.21%                  | 0.44                  | 0.49%              | 0.3               | 0.61%          | 0.17          | 0.19%                     | 0.43                     |
| 199 | 2   | CTNNA2 | rs9973600  | 80136766      | 105.97        | 0.41                   | 0.548            | G                | 0.09%                  | 0.6                   | 0.38%              | 0.3               | 0.05%          | 0.69          | 0.12%                     | 0.52                     |

|     | Q                     | R                    | S                  | T                 | U              | V             | W              | X             | Y                 | Z                | AA                    | AB                   | AC                         | AD                        | AE                     | AF                    |
|-----|-----------------------|----------------------|--------------------|-------------------|----------------|---------------|----------------|---------------|-------------------|------------------|-----------------------|----------------------|----------------------------|---------------------------|------------------------|-----------------------|
| 1   | H2_Letter-Number Span | P_Letter-Number Span | H2_Verbal learning | P_Verbal learning | H2_Abstraction | P_Abstraction | H2_Face memory | P_Face memory | H2_Spatial memory | P_Spatial memory | H2_Spatial processing | P_Spatial processing | H2_Sensori-motor dexterity | P_Sensori-motor dexterity | H2_Emotion recognition | P_Emotion recognition |
| 167 | 0.16%                 | 0.4                  | 0.21%              | 0.36              | 0.88%          | 0.09          | 0.47%          | 0.2           | 1.27%             | 0.038            | 0.45%                 | 0.25                 | 0.19%                      | 0.4                       | 1.14%                  | 0.05                  |
| 168 | 0.08%                 | 0.6                  | 0.40%              | 0.24              | 0.37%          | 0.3           | 0.41%          | 0.2           | 0.01%             | 0.83             | 1.27%                 | 0.045                | 0.65%                      | 0.14                      | 0.26%                  | 0.3                   |
| 169 | 0.10%                 | 0.6                  | 0.28%              | 0.35              | 0.21%          | 0.4           | 0.40%          | 0.3           | 0.00%             | 0.91             | 2.28%                 | 0.0136               | 0.25%                      | 0.4                       | 0.07%                  | 0.6                   |
| 170 | 0.01%                 | 0.9                  | 0.13%              | 0.5               | 0.00%          | 1             | 0.18%          | 0.4           | 0.59%             | 0.17             | 0.05%                 | 0.7                  | 0.00%                      | 0.9                       | 0.12%                  | 0.5                   |
| 171 | 0.28%                 | 0.3                  | 0.88%              | 0.078             | 0.54%          | 0.2           | 0.78%          | 0.1           | 1.01%             | 0.074            | 1.29%                 | 0.052                | 0.08%                      | 0.6                       | 0.05%                  | 0.7                   |
| 172 | 0.02%                 | 0.8                  | 0.01%              | 0.83              | 0.13%          | 0.5           | 0.12%          | 0.5           | 0.02%             | 0.8              | 0.67%                 | 0.17                 | 0.44%                      | 0.2                       | 0.23%                  | 0.4                   |
| 173 | 0.39%                 | 0.2                  | 0.05%              | 0.66              | 0.14%          | 0.5           | 0.89%          | 0.06          | 0.07%             | 0.61             | 1.15%                 | 0.052                | 0.76%                      | 0.09                      | 0.08%                  | 0.6                   |
| 174 | 0.09%                 | 0.6                  | 0.02%              | 0.8               | 0.23%          | 0.4           | 0.15%          | 0.5           | 0.69%             | 0.121            | 0.14%                 | 0.49                 | 0.37%                      | 0.3                       | 0.01%                  | 0.8                   |
| 175 | 0.47%                 | 0.2                  | 0.11%              | 0.51              | 0.03%          | 0.7           | 0.32%          | 0.2           | 0.02%             | 0.8              | 1.06%                 | 0.051                | 0.57%                      | 0.13                      | 0.12%                  | 0.5                   |
| 176 | 0.73%                 | 0.1                  | 0.13%              | 0.48              | 0.00%          | 0.9           | 0.57%          | 0.14          | 0.04%             | 0.69             | 1.03%                 | 0.069                | 0.00%                      | 0.9                       | 0.03%                  | 0.7                   |
| 177 | 0.79%                 | 0.09                 | 0.06%              | 0.64              | 0.27%          | 0.3           | 0.50%          | 0.2           | 0.22%             | 0.4              | 0.27%                 | 0.36                 | 0.08%                      | 0.6                       | 0.01%                  | 0.8                   |
| 178 | 0.47%                 | 0.2                  | 0.30%              | 0.29              | 0.05%          | 0.7           | 0.02%          | 0.8           | 0.06%             | 0.67             | 0.09%                 | 0.59                 | 0.43%                      | 0.2                       | 0.20%                  | 0.4                   |
| 179 | 0.42%                 | 0.2                  | 0.01%              | 0.88              | 0.08%          | 0.6           | 0.01%          | 0.9           | 0.20%             | 0.42             | 0.01%                 | 0.85                 | 0.59%                      | 0.2                       | 0.48%                  | 0.2                   |
| 180 | 0.10%                 | 0.5                  | 0.34%              | 0.26              | 0.27%          | 0.3           | 1.14%          | 0.04          | 0.02%             | 0.79             | 1.75%                 | 0.019                | 0.39%                      | 0.2                       | 0.15%                  | 0.5                   |
| 181 | 0.14%                 | 0.5                  | 0.18%              | 0.43              | 0.00%          | 1             | 0.00%          | 0.9           | 0.07%             | 0.64             | 0.33%                 | 0.31                 | 0.76%                      | 0.11                      | 0.96%                  | 0.07                  |
| 182 | 1.21%                 | 0.04                 | 0.13%              | 0.49              | 0.10%          | 0.6           | 0.15%          | 0.5           | 0.03%             | 0.76             | 0.44%                 | 0.25                 | 0.56%                      | 0.2                       | 0.12%                  | 0.5                   |
| 183 | 0.82%                 | 0.09                 | 0.09%              | 0.58              | 0.00%          | 1             | 0.13%          | 0.5           | 0.06%             | 0.67             | 0.16%                 | 0.49                 | 0.65%                      | 0.14                      | 0.10%                  | 0.6                   |
| 184 | 0.03%                 | 0.8                  | 0.18%              | 0.43              | 0.01%          | 0.9           | 0.17%          | 0.5           | 0.15%             | 0.5              | 0.02%                 | 0.8                  | 0.82%                      | 0.1                       | 0.00%                  | 0.9                   |
| 185 | 0.43%                 | 0.2                  | 0.00%              | 0.99              | 0.01%          | 0.9           | 0.24%          | 0.4           | 1.02%             | 0.082            | 0.25%                 | 0.41                 | 0.96%                      | 0.08                      | 0.85%                  | 0.1                   |
| 186 | 0.73%                 | 0.11                 | 0.14%              | 0.49              | 0.45%          | 0.2           | 0.09%          | 0.6           | 0.25%             | 0.36             | 0.10%                 | 0.58                 | 0.01%                      | 0.9                       | 0.18%                  | 0.4                   |
| 187 | 0.11%                 | 0.5                  | 0.36%              | 0.26              | 0.14%          | 0.5           | 0.19%          | 0.4           | 0.37%             | 0.26             | 0.00%                 | 0.98                 | 0.04%                      | 0.7                       | 0.00%                  | 1                     |
| 188 | 0.49%                 | 0.2                  | 0.23%              | 0.39              | 0.13%          | 0.5           | 0.07%          | 0.6           | 0.00%             | 0.91             | 0.48%                 | 0.25                 | 0.12%                      | 0.5                       | 1.13%                  | 0.06                  |
| 189 | 0.92%                 | 0.07                 | 0.06%              | 0.64              | 0.96%          | 0.06          | 0.27%          | 0.3           | 0.31%             | 0.31             | 0.20%                 | 0.44                 | 0.59%                      | 0.2                       | 0.47%                  | 0.2                   |
| 190 | 0.02%                 | 0.8                  | 0.04%              | 0.69              | 0.29%          | 0.3           | 0.26%          | 0.3           | 0.03%             | 0.76             | 0.04%                 | 0.73                 | 0.36%                      | 0.3                       | 0.15%                  | 0.5                   |
| 191 | 0.43%                 | 0.2                  | 0.15%              | 0.47              | 0.88%          | 0.09          | 0.10%          | 0.6           | 0.12%             | 0.54             | 0.23%                 | 0.42                 | 0.00%                      | 0.9                       | 0.19%                  | 0.4                   |
| 192 | 0.11%                 | 0.5                  | 0.06%              | 0.64              | 0.93%          | 0.07          | 0.01%          | 0.8           | 0.05%             | 0.69             | 0.44%                 | 0.25                 | 0.02%                      | 0.8                       | 0.04%                  | 0.7                   |
| 193 | 0.01%                 | 0.9                  | 0.01%              | 0.85              | 0.07%          | 0.6           | 0.03%          | 0.7           | 0.79%             | 0.107            | 0.03%                 | 0.76                 | 0.41%                      | 0.2                       | 0.02%                  | 0.8                   |
| 194 | 0.01%                 | 0.8                  | 0.15%              | 0.47              | 0.34%          | 0.3           | 0.00%          | 0.9           | 0.31%             | 0.32             | 0.01%                 | 0.89                 | 0.39%                      | 0.3                       | 0.01%                  | 0.9                   |
| 195 | 0.18%                 | 0.4                  | 0.33%              | 0.27              | 0.00%          | 0.9           | 0.16%          | 0.4           | 0.08%             | 0.61             | 0.00%                 | 0.96                 | 0.00%                      | 1                         | 0.03%                  | 0.8                   |
| 196 | 0.11%                 | 0.5                  | 0.01%              | 0.86              | 0.05%          | 0.7           | 0.27%          | 0.3           | 0.38%             | 0.26             | 0.26%                 | 0.37                 | 0.00%                      | 1                         | 0.00%                  | 1                     |
| 197 | 0.18%                 | 0.4                  | 0.00%              | 0.97              | 0.06%          | 0.6           | 0.08%          | 0.6           | 0.82%             | 0.104            | 0.19%                 | 0.45                 | 0.00%                      | 0.9                       | 0.02%                  | 0.8                   |
| 198 | 0.00%                 | 1                    | 0.15%              | 0.48              | 1.23%          | 0.04          | 0.07%          | 0.6           | 0.06%             | 0.66             | 0.19%                 | 0.45                 | 0.50%                      | 0.2                       | 0.03%                  | 0.7                   |
| 199 | 0.11%                 | 0.5                  | 0.00%              | 0.94              | 0.35%          | 0.3           | 0.01%          | 0.9           | 0.59%             | 0.16             | 0.03%                 | 0.75                 | 0.25%                      | 0.4                       | 0.18%                  | 0.4                   |

|     | A   | B      | C          | D             | E             | F                      | G                | H                | I                      | J                     | K                  | L                 | M              | N             | O                         | P                        |
|-----|-----|--------|------------|---------------|---------------|------------------------|------------------|------------------|------------------------|-----------------------|--------------------|-------------------|----------------|---------------|---------------------------|--------------------------|
| 1   | Chr | Gene   | SNP ID     | Position (bp) | Position (cM) | Minor allele frequency | Hardy-Weinberg P | Reference allele | H2_Prepulse inhibition | P_Prepulse inhibition | H2_P50 suppression | P_P50 suppression | H2_Antisaccade | P_Antisaccade | H2_Continuous performance | P_Continuous performance |
| 200 | 2   | CTNNA2 | rs2121309  | 80139124      | 105.97        | 0.42                   | 0.654            | T                | 0.03%                  | 0.75                  | 0.26%              | 0.4               | 0.07%          | 0.62          | 0.19%                     | 0.42                     |
| 201 | 2   | CTNNA2 | rs7605424  | 80155080      | 106.01        | 0.37                   | 0.033            | A                | 1.92%                  | 0.0148                | 0.02%              | 0.8               | 0.86%          | 0.087         | 2.35%                     | 0.0043                   |
| 202 | 2   | CTNNA2 | rs4852550  | 80159781      | 106.02        | 0.32                   | 0.045            | C                | 1.08%                  | 0.061                 | 0.17%              | 0.5               | 0.18%          | 0.43          | 0.38%                     | 0.24                     |
| 203 | 2   | CTNNA2 | rs716487   | 80164159      | 106.03        | 0.25                   | 0.257            | A                | 1.29%                  | 0.045                 | 0.08%              | 0.6               | 0.29%          | 0.32          | 1.72%                     | 0.015                    |
| 204 | 2   | CTNNA2 | rs2902109  | 80171196      | 106.04        | 0.20                   | 0.389            | G                | 0.81%                  | 0.114                 | 0.01%              | 0.9               | 0.02%          | 0.82          | 1.10%                     | 0.059                    |
| 205 | 2   | CTNNA2 | rs3849389  | 80212764      | 106.10        | 0.44                   | 1.000            | G                | 0.14%                  | 0.52                  | 0.11%              | 0.6               | 0.12%          | 0.54          | 0.73%                     | 0.132                    |
| 206 | 2   | CTNNA2 | rs2862019  | 80222952      | 106.10        | 0.44                   | 0.884            | G                | 0.02%                  | 0.8                   | 0.61%              | 0.2               | 0.12%          | 0.55          | 0.43%                     | 0.25                     |
| 207 | 2   | CTNNA2 | rs1867805  | 80224823      | 106.10        | 0.45                   | 0.884            | C                | 0.17%                  | 0.5                   | 0.00%              | 1                 | 0.13%          | 0.54          | 0.58%                     | 0.19                     |
| 208 | 2   | CTNNA2 | rs7605086  | 80228591      | 106.10        | 0.36                   | 0.638            | G                | 0.67%                  | 0.16                  | 0.00%              | 0.9               | 0.02%          | 0.8           | 0.16%                     | 0.49                     |
| 209 | 2   | CTNNA2 | rs2078520  | 80246156      |               | 0.00                   | 1.000            |                  |                        |                       |                    |                   |                |               |                           |                          |
| 210 | 2   | CTNNA2 | rs1443897  | 80266636      | 106.10        | 0.13                   | 0.011            | T                | 0.97%                  | 0.094                 | 0.29%              | 0.4               | 0.01%          | 0.84          | 0.38%                     | 0.26                     |
| 211 | 2   | CTNNA2 | rs894829   | 80266847      | 106.10        | 0.10                   | 0.687            | A                | 0.42%                  | 0.26                  | 0.00%              | 1                 | 1.68%          | 0.022         | 0.00%                     | 0.96                     |
| 212 | 2   | CTNNA2 | rs980741   | 80277819      | 106.10        | 0.32                   | 0.184            | A                | 1.11%                  | 0.065                 | 0.29%              | 0.4               | 0.04%          | 0.71          | 0.07%                     | 0.65                     |
| 213 | 2   | CTNNA2 | rs1374118  | 80286561      | 106.10        | 0.37                   | 0.030            | C                | 0.86%                  | 0.098                 | 0.87%              | 0.2               | 0.00%          | 0.93          | 0.10%                     | 0.56                     |
| 214 | 2   | CTNNA2 | rs2597321  | 80321430      | 106.10        | 0.36                   | 0.117            | G                | 1.33%                  | 0.045                 | 0.11%              | 0.6               | 0.04%          | 0.71          | 0.05%                     | 0.69                     |
| 215 | 2   | CTNNA2 | rs310781   | 80323440      | 106.10        | 0.38                   | 0.089            | G                | 1.23%                  | 0.054                 | 0.36%              | 0.3               | 0.03%          | 0.75          | 0.01%                     | 0.87                     |
| 216 | 2   | CTNNA2 | rs160864   | 80331785      | 106.10        | 0.45                   | 0.245            | G                | 0.16%                  | 0.5                   | 0.06%              | 0.7               | 0.03%          | 0.76          | 0.41%                     | 0.24                     |
| 217 | 2   | CTNNA2 | rs318369   | 80342285      | 106.10        | 0.50                   | 0.771            | G                | 0.01%                  | 0.86                  | 0.06%              | 0.7               | 0.05%          | 0.7           | 0.43%                     | 0.23                     |
| 218 | 2   | GAD1   | rs3791878  | 171380437     | 182.78        | 0.30                   | 0.863            | C                | 0.20%                  | 0.42                  | 0.37%              | 0.3               | 0.27%          | 0.34          | 0.49%                     | 0.2                      |
| 219 | 2   | GAD1   | rs2241165  | 171386625     | 182.78        | 0.26                   | 1.000            | A                | 0.12%                  | 0.58                  | 0.10%              | 0.6               | 0.08%          | 0.64          | 0.00%                     | 0.94                     |
| 220 | 2   | GAD1   | rs3828275  | 171390986     | 182.78        | 0.41                   | 0.882            | G                | 0.11%                  | 0.57                  | 0.03%              | 0.8               | 0.10%          | 0.57          | 0.23%                     | 0.37                     |
| 221 | 2   | GAD1   | rs3791850  | 171416346     | 182.78        | 0.22                   | 0.281            | C                | 1.11%                  | 0.072                 | 0.00%              | 1                 | 0.00%          | 1             | 0.64%                     | 0.146                    |
| 222 | 2   | GAD1   | rs769393   | 171417767     | 182.78        | 0.06                   | 0.067            | G                | 1.22%                  | 0.044                 | 0.26%              | 0.4               | 0.00%          | 0.99          | 1.20%                     | 0.056                    |
| 223 | 2   | GAD1   | rs7578661  | 171423379     | 182.78        | 0.28                   | 1.000            | C                | 0.09%                  | 0.59                  | 0.16%              | 0.5               | 0.01%          | 0.86          | 0.01%                     | 0.85                     |
| 224 | 2   | GAD1   | rs4297845  | 171427785     | 182.78        | 0.50                   | 0.566            | G                | 0.47%                  | 0.24                  | 0.61%              | 0.2               | 0.02%          | 0.8           | 0.42%                     | 0.24                     |
| 225 | 2   | ERBB4  | rs1836724  | 211953197     | 210.46        | 0.38                   | 1.000            | T                | 1.15%                  | 0.068                 | 0.02%              | 0.8               | 0.01%          | 0.84          | 0.14%                     | 0.51                     |
| 226 | 2   | ERBB4  | rs3791682  | 211957951     | 210.46        | 0.31                   | 0.066            | T                | 0.02%                  | 0.81                  | 0.00%              | 1                 | 0.57%          | 0.17          | 0.00%                     | 0.98                     |
| 227 | 2   | ERBB4  | rs1816532  | 211976485     | 210.47        | 0.29                   | 1.000            | T                | 0.81%                  | 0.117                 | 0.63%              | 0.2               | 0.00%          | 0.93          | 0.79%                     | 0.1                      |
| 228 | 2   | ERBB4  | rs3791700  | 211983265     | 210.48        | 0.27                   | 0.147            | A                | 0.46%                  | 0.24                  | 0.13%              | 0.6               | 0.38%          | 0.26          | 0.01%                     | 0.86                     |
| 229 | 2   | ERBB4  | rs3791703  | 211992598     | 210.49        | 0.37                   | 1.000            | C                | 0.01%                  | 0.84                  | 0.16%              | 0.5               | 0.08%          | 0.61          | 0.26%                     | 0.35                     |
| 230 | 2   | ERBB4  | rs3791709  | 211995179     | 210.49        | 0.28                   | 0.599            | A                | 0.24%                  | 0.39                  | 1.20%              | 0.08              | 0.06%          | 0.65          | 0.26%                     | 0.35                     |
| 231 | 2   | ERBB4  | rs10497944 | 212002670     | 210.50        | 0.38                   | 0.219            | C                | 1.25%                  | 0.047                 | 0.03%              | 0.8               | 0.01%          | 0.89          | 0.13%                     | 0.5                      |
| 232 | 2   | ERBB4  | rs2033647  | 212010372     | 210.50        | 0.28                   | 1.000            | T                | 0.16%                  | 0.47                  | 0.11%              | 0.6               | 0.09%          | 0.58          | 0.07%                     | 0.61                     |

|     | Q                     | R                    | S                  | T                 | U              | V             | W              | X             | Y                 | Z                | AA                    | AB                   | AC                         | AD                        | AE                     | AF                    |
|-----|-----------------------|----------------------|--------------------|-------------------|----------------|---------------|----------------|---------------|-------------------|------------------|-----------------------|----------------------|----------------------------|---------------------------|------------------------|-----------------------|
| 1   | H2_Letter-Number Span | P_Letter-Number Span | H2_Verbal learning | P_Verbal learning | H2_Abstraction | P_Abstraction | H2_Face memory | P_Face memory | H2_Spatial memory | P_Spatial memory | H2_Spatial processing | P_Spatial processing | H2_Sensori-motor dexterity | P_Sensori-motor dexterity | H2_Emotion recognition | P_Emotion recognition |
| 200 | 0.30%                 | 0.3                  | 0.02%              | 0.8               | 0.30%          | 0.3           | 0.05%          | 0.7           | 0.83%             | 0.096            | 0.13%                 | 0.53                 | 0.29%                      | 0.3                       | 0.14%                  | 0.5                   |
| 201 | 2.25%                 | 0.004                | 0.36%              | 0.24              | 0.92%          | 0.07          | 0.42%          | 0.2           | 0.00%             | 0.93             | 2.67%                 | 0.0043               | 0.65%                      | 0.13                      | 0.00%                  | 1                     |
| 202 | 0.53%                 | 0.2                  | 0.04%              | 0.68              | 0.04%          | 0.7           | 0.05%          | 0.7           | 0.53%             | 0.18             | 0.01%                 | 0.87                 | 0.05%                      | 0.7                       | 0.08%                  | 0.6                   |
| 203 | 1.62%                 | 0.015                | 0.16%              | 0.43              | 0.93%          | 0.06          | 0.35%          | 0.3           | 0.00%             | 0.99             | 1.04%                 | 0.072                | 0.02%                      | 0.8                       | 0.00%                  | 0.9                   |
| 204 | 1.87%                 | 0.011                | 0.01%              | 0.86              | 0.35%          | 0.3           | 0.11%          | 0.5           | 0.13%             | 0.51             | 0.98%                 | 0.09                 | 0.00%                      | 1                         | 0.00%                  | 1                     |
| 205 | 0.70%                 | 0.13                 | 0.23%              | 0.38              | 1.28%          | 0.04          | 0.17%          | 0.4           | 0.00%             | 0.99             | 3.14%                 | 0.0027               | 0.21%                      | 0.4                       | 0.01%                  | 0.9                   |
| 206 | 0.08%                 | 0.6                  | 0.18%              | 0.44              | 0.49%          | 0.2           | 0.28%          | 0.3           | 0.00%             | 0.9              | 2.42%                 | 0.0084               | 0.74%                      | 0.12                      | 0.06%                  | 0.7                   |
| 207 | 0.86%                 | 0.1                  | 0.13%              | 0.52              | 1.22%          | 0.04          | 0.17%          | 0.4           | 0.00%             | 0.92             | 3.06%                 | 0.0038               | 0.89%                      | 0.09                      | 0.07%                  | 0.6                   |
| 208 | 0.32%                 | 0.3                  | 0.19%              | 0.42              | 1.26%          | 0.05          | 0.22%          | 0.4           | 0.05%             | 0.71             | 1.12%                 | 0.076                | 0.21%                      | 0.4                       | 0.21%                  | 0.4                   |
| 209 |                       |                      |                    |                   |                |               |                |               |                   |                  |                       |                      |                            |                           |                        |                       |
| 210 | 0.07%                 | 0.6                  | 0.03%              | 0.75              | 0.65%          | 0.13          | 0.02%          | 0.8           | 0.00%             | 0.93             | 0.25%                 | 0.4                  | 0.32%                      | 0.3                       | 0.01%                  | 0.9                   |
| 211 | 0.12%                 | 0.5                  | 0.01%              | 0.84              | 0.24%          | 0.4           | 0.12%          | 0.5           | 0.03%             | 0.77             | 0.57%                 | 0.19                 | 0.04%                      | 0.7                       | 0.47%                  | 0.2                   |
| 212 | 0.05%                 | 0.7                  | 0.13%              | 0.49              | 1.45%          | 0.02          | 0.02%          | 0.8           | 0.01%             | 0.83             | 0.49%                 | 0.23                 | 0.47%                      | 0.2                       | 0.07%                  | 0.6                   |
| 213 | 0.17%                 | 0.4                  | 0.46%              | 0.2               | 1.59%          | 0.02          | 0.06%          | 0.7           | 0.04%             | 0.72             | 0.76%                 | 0.126                | 0.58%                      | 0.2                       | 0.12%                  | 0.5                   |
| 214 | 0.03%                 | 0.8                  | 0.13%              | 0.51              | 1.10%          | 0.05          | 0.04%          | 0.7           | 0.06%             | 0.67             | 0.55%                 | 0.21                 | 0.12%                      | 0.5                       | 0.07%                  | 0.6                   |
| 215 | 0.80%                 | 0.09                 | 0.50%              | 0.18              | 1.11%          | 0.05          | 0.01%          | 0.8           | 0.02%             | 0.81             | 0.60%                 | 0.18                 | 0.71%                      | 0.12                      | 0.01%                  | 0.9                   |
| 216 | 0.76%                 | 0.1                  | 0.54%              | 0.16              | 0.32%          | 0.3           | 0.00%          | 0.9           | 0.05%             | 0.67             | 0.30%                 | 0.34                 | 0.75%                      | 0.11                      | 0.03%                  | 0.8                   |
| 217 | 0.10%                 | 0.5                  | 0.11%              | 0.52              | 0.60%          | 0.2           | 0.03%          | 0.7           | 0.01%             | 0.87             | 0.33%                 | 0.32                 | 0.21%                      | 0.4                       | 0.06%                  | 0.6                   |
| 218 | 0.51%                 | 0.2                  | 0.06%              | 0.65              | 0.39%          | 0.3           | 0.65%          | 0.14          | 0.44%             | 0.23             | 0.15%                 | 0.5                  | 0.56%                      | 0.2                       | 0.25%                  | 0.4                   |
| 219 | 0.18%                 | 0.4                  | 0.00%              | 0.92              | 0.05%          | 0.7           | 0.00%          | 1             | 0.27%             | 0.37             | 0.02%                 | 0.81                 | 0.05%                      | 0.7                       | 0.58%                  | 0.2                   |
| 220 | 0.53%                 | 0.2                  | 0.00%              | 0.98              | 0.20%          | 0.4           | 0.49%          | 0.2           | 0.11%             | 0.54             | 0.01%                 | 0.88                 | 0.08%                      | 0.6                       | 0.06%                  | 0.7                   |
| 221 | 0.05%                 | 0.7                  | 0.27%              | 0.33              | 1.05%          | 0.05          | 0.07%          | 0.6           | 0.91%             | 0.093            | 0.30%                 | 0.36                 | 0.01%                      | 0.9                       | 0.95%                  | 0.08                  |
| 222 | 0.07%                 | 0.6                  | 0.29%              | 0.3               | 0.42%          | 0.2           | 0.01%          | 0.8           | 0.21%             | 0.4              | 0.15%                 | 0.49                 | 0.10%                      | 0.6                       | 0.20%                  | 0.4                   |
| 223 | 0.07%                 | 0.6                  | 0.32%              | 0.27              | 0.03%          | 0.8           | 0.00%          | 0.9           | 0.17%             | 0.44             | 0.06%                 | 0.65                 | 0.00%                      | 0.9                       | 0.00%                  | 1                     |
| 224 | 0.14%                 | 0.5                  | 0.16%              | 0.46              | 0.17%          | 0.4           | 0.14%          | 0.5           | 0.60%             | 0.17             | 0.00%                 | 0.95                 | 0.05%                      | 0.7                       | 0.60%                  | 0.2                   |
| 225 | 0.01%                 | 0.9                  | 0.33%              | 0.29              | 0.28%          | 0.3           | 1.00%          | 0.07          | 0.12%             | 0.54             | 0.28%                 | 0.38                 | 0.05%                      | 0.7                       | 0.57%                  | 0.2                   |
| 226 | 0.20%                 | 0.4                  | 0.03%              | 0.75              | 0.02%          | 0.8           | 0.01%          | 0.8           | 0.25%             | 0.36             | 0.05%                 | 0.69                 | 0.16%                      | 0.5                       | 0.19%                  | 0.4                   |
| 227 | 0.14%                 | 0.5                  | 1.57%              | 0.017             | 0.12%          | 0.5           | 0.64%          | 0.14          | 0.51%             | 0.2              | 0.20%                 | 0.44                 | 0.01%                      | 0.8                       | 0.01%                  | 0.9                   |
| 228 | 0.04%                 | 0.7                  | 0.02%              | 0.77              | 0.23%          | 0.4           | 0.02%          | 0.8           | 0.14%             | 0.49             | 0.17%                 | 0.47                 | 0.14%                      | 0.5                       | 0.72%                  | 0.12                  |
| 229 | 0.01%                 | 0.8                  | 0.00%              | 0.96              | 0.84%          | 0.08          | 0.18%          | 0.4           | 0.94%             | 0.069            | 0.04%                 | 0.71                 | 0.41%                      | 0.2                       | 1.25%                  | 0.03                  |
| 230 | 0.00%                 | 0.9                  | 0.00%              | 0.94              | 0.71%          | 0.11          | 0.01%          | 0.8           | 0.33%             | 0.29             | 0.26%                 | 0.36                 | 0.02%                      | 0.8                       | 1.64%                  | 0.02                  |
| 231 | 0.90%                 | 0.07                 | 0.94%              | 0.062             | 1.18%          | 0.04          | 0.27%          | 0.3           | 0.01%             | 0.87             | 0.00%                 | 0.92                 | 0.00%                      | 1                         | 0.33%                  | 0.3                   |
| 232 | 0.02%                 | 0.8                  | 0.01%              | 0.81              | 0.34%          | 0.3           | 0.02%          | 0.8           | 0.36%             | 0.25             | 0.01%                 | 0.88                 | 0.01%                      | 0.9                       | 1.43%                  | 0.02                  |

|     | A   | B     | C          | D             | E             | F                      | G                | H                | I                      | J                     | K                  | L                 | M              | N             | O                         | P                        |
|-----|-----|-------|------------|---------------|---------------|------------------------|------------------|------------------|------------------------|-----------------------|--------------------|-------------------|----------------|---------------|---------------------------|--------------------------|
| 1   | Chr | Gene  | SNP ID     | Position (bp) | Position (cM) | Minor allele frequency | Hardy-Weinberg P | Reference allele | H2_Prepulse inhibition | P_Prepulse inhibition | H2_P50 suppression | P_P50 suppression | H2_Antisaccade | P_Antisaccade | H2_Continuous performance | P_Continuous performance |
| 233 | 2   | ERBB4 | rs1816531  | 212019978     | 210.51        | 0.36                   | 1.000            | T                | 0.91%                  | 0.1                   | 0.02%              | 0.8               | 0.14%          | 0.51          | 0.18%                     | 0.43                     |
| 234 | 2   | ERBB4 | rs2371271  | 212024933     | 210.52        | 0.50                   | 0.469            | T                | 0.65%                  | 0.146                 | 0.40%              | 0.3               | 0.12%          | 0.52          | 0.01%                     | 0.83                     |
| 235 | 2   | ERBB4 | rs1836749  | 212036235     | 210.56        | 0.31                   | 1.000            | C                | 0.11%                  | 0.57                  | 0.08%              | 0.6               | 0.10%          | 0.56          | 0.07%                     | 0.63                     |
| 236 | 2   | ERBB4 | rs4302167  | 212041668     | 210.58        | 0.21                   | 0.523            | T                | 1.18%                  | 0.054                 | 0.03%              | 0.8               | 0.00%          | 0.98          | 0.08%                     | 0.59                     |
| 237 | 2   | ERBB4 | rs4439896  | 212053703     | 210.62        | 0.23                   | 0.677            | A                | 0.81%                  | 0.115                 | 0.01%              | 0.8               | 0.08%          | 0.6           | 0.01%                     | 0.83                     |
| 238 | 2   | ERBB4 | rs4672614  | 212058333     | 210.63        | 0.22                   | 0.665            | A                | 1.05%                  | 0.071                 | 0.02%              | 0.8               | 0.13%          | 0.51          | 0.03%                     | 0.75                     |
| 239 | 2   | ERBB4 | rs4672615  | 212065237     | 210.66        | 0.29                   | 0.860            | C                | 0.64%                  | 0.15                  | 0.29%              | 0.4               | 0.01%          | 0.85          | 0.06%                     | 0.66                     |
| 240 | 2   | ERBB4 | rs4278873  | 212069319     | 210.67        | 0.19                   | 0.237            | A                | 0.04%                  | 0.72                  | 1.22%              | 0.06              | 0.85%          | 0.078         | 1.23%                     | 0.033                    |
| 241 | 2   | ERBB4 | rs4358067  | 212072729     | 210.68        | 0.34                   | 0.422            | G                | 0.44%                  | 0.25                  | 0.22%              | 0.5               | 0.02%          | 0.81          | 0.16%                     | 0.47                     |
| 242 | 2   | ERBB4 | rs10932379 | 212083593     | 210.72        | 0.43                   | 0.557            | A                | 0.23%                  | 0.41                  | 0.02%              | 0.8               | 0.00%          | 0.92          | 0.15%                     | 0.49                     |
| 243 | 2   | ERBB4 | rs6435632  | 212086769     | 210.73        | 0.30                   | 0.729            | G                | 0.00%                  | 0.92                  | 0.03%              | 0.8               | 0.00%          | 0.95          | 0.48%                     | 0.23                     |
| 244 | 2   | ERBB4 | rs10932380 | 212098595     | 210.77        | 0.34                   | 0.072            | A                | 0.21%                  | 0.43                  | 0.70%              | 0.2               | 0.08%          | 0.61          | 0.07%                     | 0.63                     |
| 245 | 2   | ERBB4 | rs1851183  | 212112767     | 210.81        | 0.30                   | 0.286            | T                | 0.46%                  | 0.24                  | 1.24%              | 0.07              | 0.24%          | 0.37          | 0.33%                     | 0.29                     |
| 246 | 2   | ERBB4 | rs953956   | 212121920     | 210.84        | 0.16                   | 1.000            | C                | 0.06%                  | 0.67                  | 0.00%              | 1                 | 0.04%          | 0.73          | 0.05%                     | 0.67                     |
| 247 | 2   | ERBB4 | rs10497945 | 212126355     | 210.86        | 0.22                   | 0.143            | A                | 0.00%                  | 0.95                  | 0.35%              | 0.4               | 0.36%          | 0.26          | 0.18%                     | 0.42                     |
| 248 | 2   | ERBB4 | rs10497946 | 212126407     | 210.86        | 0.02                   | 0.057            | G                | 0.22%                  | 0.59                  | 0.18%              | 0.5               | 0.17%          | 0.54          | 0.34%                     | 0.38                     |
| 249 | 2   | ERBB4 | rs1879531  | 212147301     | 210.93        | 0.20                   | 0.359            | A                | 0.00%                  | 0.97                  | 0.27%              | 0.4               | 0.42%          | 0.23          | 0.80%                     | 0.097                    |
| 250 | 2   | ERBB4 | rs1818751  | 212162650     | 210.98        | 0.15                   | 0.074            | G                | 0.00%                  | 0.92                  | 0.01%              | 0.9               | 0.17%          | 0.44          | 0.04%                     | 0.69                     |
| 251 | 2   | ERBB4 | rs1972143  | 212170367     | 211.00        | 0.08                   | 0.321            | G                | 0.85%                  | 0.098                 | 0.30%              | 0.4               | 0.00%          | 0.92          | 0.06%                     | 0.63                     |
| 252 | 2   | ERBB4 | rs1851196  | 212178865     | 211.03        | 0.09                   | 0.636            | A                | 1.53%                  | 0.031                 | 0.84%              | 0.13              | 0.02%          | 0.79          | 0.00%                     | 0.9                      |
| 253 | 2   | ERBB4 | rs7601664  | 212201009     | 211.11        | 0.12                   | 0.247            | A                | 0.47%                  | 0.24                  | 0.85%              | 0.12              | 0.00%          | 0.93          | 0.00%                     | 0.95                     |
| 254 | 2   | ERBB4 | rs6435644  | 212213909     | 211.15        | 0.01                   | 1.000            | T                | 2.54%                  | 0.034                 | 0.00%              | 1                 | 0.86%          | 0.119         | 0.81%                     | 0.18                     |
| 255 | 2   | ERBB4 | rs6435647  | 212215478     | 211.15        | 0.02                   | 0.072            | A                | 1.39%                  | 0.121                 | 0.07%              | 0.7               | 0.36%          | 0.27          | 0.00%                     | 0.94                     |
| 256 | 2   | ERBB4 | rs10932390 | 212220691     | 211.17        | 0.15                   | 0.772            | G                | 0.63%                  | 0.19                  | 0.21%              | 0.5               | 0.01%          | 0.88          | 0.69%                     | 0.144                    |
| 257 | 2   | ERBB4 | rs6708035  | 212224987     |               | 0.26                   | 0.000            |                  |                        |                       |                    |                   |                |               |                           |                          |
| 258 | 2   | ERBB4 | rs6730119  | 212227273     | 211.19        | 0.44                   | 0.381            | G                | 0.11%                  | 0.56                  | 0.02%              | 0.8               | 0.13%          | 0.52          | 0.00%                     | 0.93                     |
| 259 | 2   | ERBB4 | rs6719645  | 212233218     | 211.21        | 0.18                   | 1.000            | C                | 0.83%                  | 0.103                 | 0.73%              | 0.2               | 0.00%          | 0.91          | 0.05%                     | 0.68                     |
| 260 | 2   | ERBB4 | rs6719664  | 212233284     | 211.21        | 0.11                   | 0.436            | T                | 0.00%                  | 0.96                  | 0.48%              | 0.2               | 0.93%          | 0.08          | 0.42%                     | 0.24                     |
| 261 | 2   | ERBB4 | rs6725181  | 212238711     | 211.23        | 0.14                   | 0.497            | C                | 0.27%                  | 0.35                  | 0.44%              | 0.3               | 0.41%          | 0.25          | 0.09%                     | 0.58                     |
| 262 | 2   | ERBB4 | rs1818750  | 212243604     | 211.25        | 0.02                   | 1.000            | T                | 0.15%                  | 0.39                  | 0.07%              | 0.7               | 0.19%          | 0.36          | 0.25%                     | 0.27                     |
| 263 | 2   | ERBB4 | rs10173674 | 212253778     | 211.28        | 0.42                   | 0.655            | T                | 0.09%                  | 0.6                   | 0.05%              | 0.7               | 0.08%          | 0.61          | 0.17%                     | 0.44                     |
| 264 | 2   | ERBB4 | rs1829615  | 212256022     | 211.29        | 0.46                   | 1.000            | A                | 0.05%                  | 0.69                  | 0.12%              | 0.6               | 0.20%          | 0.43          | 0.07%                     | 0.64                     |
| 265 | 2   | ERBB4 | rs2371276  | 212263330     | 211.31        | 0.46                   | 0.885            | A                | 0.06%                  | 0.69                  | 0.04%              | 0.8               | 0.01%          | 0.87          | 0.04%                     | 0.72                     |

|     | Q                     | R                    | S                  | T                 | U              | V             | W              | X             | Y                 | Z                | AA                    | AB                   | AC                         | AD                        | AE                     | AF                    |
|-----|-----------------------|----------------------|--------------------|-------------------|----------------|---------------|----------------|---------------|-------------------|------------------|-----------------------|----------------------|----------------------------|---------------------------|------------------------|-----------------------|
| 1   | H2_Letter-Number Span | P_Letter-Number Span | H2_Verbal learning | P_Verbal learning | H2_Abstraction | P_Abstraction | H2_Face memory | P_Face memory | H2_Spatial memory | P_Spatial memory | H2_Spatial processing | P_Spatial processing | H2_Sensori-motor dexterity | P_Sensori-motor dexterity | H2_Emotion recognition | P_Emotion recognition |
| 233 | 1.99%                 | 0.007                | 0.45%              | 0.2               | 0.04%          | 0.7           | 0.60%          | 0.15          | 0.24%             | 0.38             | 0.41%                 | 0.28                 | 0.05%                      | 0.7                       | 0.01%                  | 0.9                   |
| 234 | 0.82%                 | 0.07                 | 0.01%              | 0.83              | 0.03%          | 0.8           | 0.73%          | 0.1           | 0.01%             | 0.83             | 0.16%                 | 0.48                 | 0.12%                      | 0.5                       | 0.01%                  | 0.8                   |
| 235 | 0.76%                 | 0.09                 | 0.00%              | 0.91              | 0.43%          | 0.2           | 0.93%          | 0.06          | 0.70%             | 0.12             | 0.17%                 | 0.47                 | 0.16%                      | 0.5                       | 0.00%                  | 1                     |
| 236 | 0.26%                 | 0.3                  | 0.29%              | 0.28              | 0.60%          | 0.13          | 1.82%          | 0.008         | 1.15%             | 0.042            | 0.00%                 | 0.94                 | 0.16%                      | 0.4                       | 0.12%                  | 0.5                   |
| 237 | 0.93%                 | 0.06                 | 0.10%              | 0.54              | 0.06%          | 0.6           | 0.12%          | 0.5           | 0.24%             | 0.35             | 0.38%                 | 0.27                 | 0.31%                      | 0.3                       | 0.86%                  | 0.08                  |
| 238 | 0.80%                 | 0.08                 | 0.00%              | 0.96              | 0.01%          | 0.9           | 1.24%          | 0.03          | 0.76%             | 0.108            | 0.00%                 | 0.96                 | 0.24%                      | 0.4                       | 0.11%                  | 0.5                   |
| 239 | 0.79%                 | 0.09                 | 0.16%              | 0.45              | 0.05%          | 0.7           | 1.02%          | 0.05          | 0.86%             | 0.087            | 0.08%                 | 0.61                 | 0.62%                      | 0.14                      | 0.01%                  | 0.8                   |
| 240 | 0.66%                 | 0.12                 | 0.59%              | 0.132             | 0.03%          | 0.7           | 0.21%          | 0.4           | 0.57%             | 0.142            | 1.90%                 | 0.0102               | 0.34%                      | 0.3                       | 0.37%                  | 0.2                   |
| 241 | 0.79%                 | 0.1                  | 0.15%              | 0.46              | 0.01%          | 0.9           | 1.24%          | 0.04          | 0.68%             | 0.135            | 1.20%                 | 0.059                | 0.03%                      | 0.8                       | 0.13%                  | 0.5                   |
| 242 | 0.25%                 | 0.4                  | 0.39%              | 0.24              | 0.33%          | 0.3           | 0.81%          | 0.1           | 0.42%             | 0.25             | 0.22%                 | 0.43                 | 0.26%                      | 0.4                       | 0.06%                  | 0.7                   |
| 243 | 0.01%                 | 0.9                  | 0.20%              | 0.41              | 0.03%          | 0.7           | 0.17%          | 0.5           | 0.14%             | 0.51             | 0.67%                 | 0.17                 | 0.34%                      | 0.3                       | 0.58%                  | 0.2                   |
| 244 | 0.00%                 | 1                    | 0.05%              | 0.69              | 1.25%          | 0.04          | 0.02%          | 0.8           | 1.64%             | 0.022            | 0.01%                 | 0.88                 | 0.37%                      | 0.3                       | 0.28%                  | 0.3                   |
| 245 | 0.00%                 | 0.9                  | 0.00%              | 0.91              | 0.43%          | 0.2           | 0.00%          | 0.9           | 0.70%             | 0.129            | 0.12%                 | 0.54                 | 0.03%                      | 0.7                       | 0.08%                  | 0.6                   |
| 246 | 0.57%                 | 0.2                  | 0.00%              | 0.9               | 0.00%          | 1             | 0.29%          | 0.3           | 0.22%             | 0.39             | 0.31%                 | 0.32                 | 0.06%                      | 0.7                       | 0.07%                  | 0.6                   |
| 247 | 0.73%                 | 0.1                  | 0.03%              | 0.73              | 0.10%          | 0.5           | 0.07%          | 0.6           | 0.17%             | 0.43             | 0.03%                 | 0.76                 | 0.42%                      | 0.3                       | 0.25%                  | 0.4                   |
| 248 | 0.12%                 | 0.6                  | 0.02%              | 0.82              | 1.33%          | 0.04          | 0.22%          | 0.4           | 0.03%             | 0.79             | 0.13%                 | 0.57                 | 0.16%                      | 0.4                       | 0.50%                  | 0.2                   |
| 249 | 1.55%                 | 0.02                 | 0.48%              | 0.19              | 0.46%          | 0.2           | 0.48%          | 0.2           | 1.08%             | 0.05             | 0.77%                 | 0.105                | 0.01%                      | 0.8                       | 0.50%                  | 0.2                   |
| 250 | 0.39%                 | 0.2                  | 0.00%              | 0.93              | 0.02%          | 0.8           | 0.02%          | 0.8           | 0.09%             | 0.58             | 0.13%                 | 0.53                 | 0.30%                      | 0.3                       | 0.02%                  | 0.8                   |
| 251 | 0.21%                 | 0.4                  | 0.00%              | 0.99              | 0.01%          | 0.8           | 0.06%          | 0.6           | 0.02%             | 0.77             | 0.01%                 | 0.82                 | 0.01%                      | 0.9                       | 0.01%                  | 0.8                   |
| 252 | 0.09%                 | 0.5                  | 0.01%              | 0.86              | 0.00%          | 0.9           | 0.14%          | 0.5           | 0.02%             | 0.77             | 0.07%                 | 0.64                 | 0.01%                      | 0.9                       | 0.01%                  | 0.9                   |
| 253 | 0.03%                 | 0.7                  | 0.00%              | 0.98              | 0.01%          | 0.9           | 0.23%          | 0.3           | 0.09%             | 0.57             | 0.00%                 | 0.95                 | 0.23%                      | 0.4                       | 0.22%                  | 0.4                   |
| 254 | 0.00%                 | 0.9                  | 0.37%              | 0.31              | 0.34%          | 0.3           | 0.15%          | 0.5           | 0.24%             | 0.41             | 0.04%                 | 0.74                 | 0.30%                      | 0.4                       | 0.16%                  | 0.5                   |
| 255 | 0.04%                 | 0.7                  | 0.31%              | 0.36              | 0.21%          | 0.4           | 0.69%          | 0.11          | 0.76%             | 0.116            | 0.11%                 | 0.56                 | 0.29%                      | 0.3                       | 0.25%                  | 0.3                   |
| 256 | 0.01%                 | 0.8                  | 1.29%              | 0.04              | 0.06%          | 0.6           | 0.26%          | 0.4           | 0.11%             | 0.57             | 0.00%                 | 0.97                 | 0.13%                      | 0.5                       | 0.33%                  | 0.3                   |
| 257 |                       |                      |                    |                   |                |               |                |               |                   |                  |                       |                      |                            |                           |                        |                       |
| 258 | 0.71%                 | 0.11                 | 0.00%              | 0.91              | 0.47%          | 0.2           | 0.19%          | 0.4           | 0.01%             | 0.88             | 0.30%                 | 0.35                 | 0.00%                      | 0.9                       | 0.11%                  | 0.5                   |
| 259 | 0.13%                 | 0.5                  | 0.15%              | 0.46              | 0.54%          | 0.2           | 0.04%          | 0.7           | 0.03%             | 0.74             | 0.70%                 | 0.15                 | 0.17%                      | 0.5                       | 1.05%                  | 0.06                  |
| 260 | 0.01%                 | 0.9                  | 0.38%              | 0.25              | 0.31%          | 0.3           | 0.60%          | 0.2           | 0.32%             | 0.31             | 0.03%                 | 0.76                 | 0.07%                      | 0.6                       | 0.30%                  | 0.3                   |
| 261 | 2.26%                 | 0.004                | 0.01%              | 0.88              | 0.32%          | 0.3           | 0.05%          | 0.7           | 0.05%             | 0.68             | 0.01%                 | 0.86                 | 0.13%                      | 0.5                       | 0.05%                  | 0.7                   |
| 262 | 0.44%                 | 0.13                 | 0.34%              | 0.18              | 0.23%          | 0.3           | 0.13%          | 0.4           | 0.04%             | 0.66             | 0.59%                 | 0.084                | 0.05%                      | 0.6                       | 0.50%                  | 0.12                  |
| 263 | 0.31%                 | 0.3                  | 0.42%              | 0.22              | 0.11%          | 0.5           | 0.12%          | 0.5           | 0.04%             | 0.72             | 0.10%                 | 0.59                 | 0.17%                      | 0.5                       | 0.10%                  | 0.6                   |
| 264 | 0.60%                 | 0.2                  | 0.22%              | 0.38              | 0.72%          | 0.12          | 0.03%          | 0.8           | 0.04%             | 0.71             | 0.00%                 | 0.99                 | 0.03%                      | 0.7                       | 0.09%                  | 0.6                   |
| 265 | 0.00%                 | 0.9                  | 0.06%              | 0.65              | 0.08%          | 0.6           | 0.04%          | 0.7           | 0.03%             | 0.76             | 0.35%                 | 0.34                 | 0.13%                      | 0.5                       | 0.08%                  | 0.6                   |



|     | A   | B     | C          | D             | E             | F                      | G                | H                | I                      | J                     | K                  | L                 | M              | N             | O                         | P                        |
|-----|-----|-------|------------|---------------|---------------|------------------------|------------------|------------------|------------------------|-----------------------|--------------------|-------------------|----------------|---------------|---------------------------|--------------------------|
| 1   | Chr | Gene  | SNP ID     | Position (bp) | Position (cM) | Minor allele frequency | Hardy-Weinberg P | Reference allele | H2_Prepulse inhibition | P_Prepulse inhibition | H2_P50 suppression | P_P50 suppression | H2_Antisaccade | P_Antisaccade | H2_Continuous performance | P_Continuous performance |
| 266 | 2   | ERBB4 | rs7425448  | 212266785     | 211.32        | 0.17                   | 0.204            | C                | 0.11%                  | 0.57                  | 0.19%              | 0.5               | 0.19%          | 0.43          | 0.37%                     | 0.26                     |
| 267 | 2   | ERBB4 | rs10205553 | 212268193     | 211.33        | 0.47                   | 1.000            | A                | 0.02%                  | 0.83                  | 0.38%              | 0.3               | 0.06%          | 0.66          | 0.13%                     | 0.51                     |
| 268 | 2   | ERBB4 | rs6435659  | 212273140     | 211.34        | 0.49                   | 0.664            | T                | 0.26%                  | 0.37                  | 0.07%              | 0.7               | 0.21%          | 0.42          | 0.81%                     | 0.099                    |
| 269 | 2   | ERBB4 | rs3923755  | 212274316     | 211.35        | 0.44                   | 1.000            | C                | 0.07%                  | 0.67                  | 1.01%              | 0.12              | 0.01%          | 0.85          | 0.12%                     | 0.53                     |
| 270 | 2   | ERBB4 | rs6435660  | 212280184     | 211.37        | 0.44                   | 0.884            | C                | 0.62%                  | 0.18                  | 0.02%              | 0.8               | 0.28%          | 0.34          | 0.00%                     | 0.99                     |
| 271 | 2   | ERBB4 | rs6745717  | 212285476     | 211.38        | 0.16                   | 0.579            | T                | 0.49%                  | 0.25                  | 0.04%              | 0.8               | 0.33%          | 0.31          | 0.04%                     | 0.73                     |
| 272 | 2   | ERBB4 | rs12162287 | 212288142     | 211.39        | 0.26                   | 0.459            | C                | 0.16%                  | 0.48                  | 0.64%              | 0.2               | 0.15%          | 0.49          | 0.25%                     | 0.36                     |
| 273 | 2   | ERBB4 | rs6435665  | 212299886     | 211.43        | 0.12                   | 0.745            | G                | 0.31%                  | 0.37                  | 0.01%              | 0.9               | 0.07%          | 0.64          | 0.63%                     | 0.16                     |
| 274 | 2   | ERBB4 | rs7570613  | 212337824     | 211.56        | 0.24                   | 0.163            | T                | 0.08%                  | 0.64                  | 0.16%              | 0.5               | 0.41%          | 0.26          | 0.19%                     | 0.43                     |
| 275 | 2   | ERBB4 | rs7423708  | 212354130     | 211.61        | 0.29                   | 0.074            | T                | 0.00%                  | 0.99                  | 0.05%              | 0.7               | 0.81%          | 0.123         | 0.20%                     | 0.42                     |
| 276 | 2   | ERBB4 | rs7588431  | 212359230     | 211.63        | 0.42                   | 0.555            | C                | 0.29%                  | 0.36                  | 0.32%              | 0.4               | 0.61%          | 0.17          | 0.04%                     | 0.71                     |
| 277 | 2   | ERBB4 | rs6435670  | 212364130     | 211.64        | 0.28                   | 0.274            | G                | 0.52%                  | 0.21                  | 0.02%              | 0.8               | 0.00%          | 0.91          | 0.04%                     | 0.71                     |
| 278 | 2   | ERBB4 | rs4673633  | 212366542     | 211.65        | 0.18                   | 0.151            | G                | 0.08%                  | 0.63                  | 0.03%              | 0.8               | 0.15%          | 0.47          | 0.18%                     | 0.43                     |
| 279 | 2   | ERBB4 | rs4672626  | 212378670     | 211.69        | 0.10                   | 1.000            | G                | 0.14%                  | 0.52                  | 0.08%              | 0.7               | 0.03%          | 0.73          | 0.05%                     | 0.68                     |
| 280 | 2   | ERBB4 | rs7583346  | 212386651     | 211.72        | 0.31                   | 0.395            | C                | 0.31%                  | 0.35                  | 1.43%              | 0.06              | 0.01%          | 0.87          | 0.17%                     | 0.45                     |
| 281 | 2   | ERBB4 | rs10497952 | 212431603     | 211.87        | 0.23                   | 0.242            | G                | 0.38%                  | 0.29                  | 0.26%              | 0.4               | 0.07%          | 0.64          | 0.07%                     | 0.64                     |
| 282 | 2   | ERBB4 | rs1025752  | 212431704     | 211.87        | 0.43                   | 0.298            | A                | 0.02%                  | 0.82                  | 0.36%              | 0.3               | 0.11%          | 0.55          | 0.32%                     | 0.29                     |
| 283 | 2   | ERBB4 | rs1439252  | 212445389     | 211.91        | 0.37                   | 0.535            | G                | 0.12%                  | 0.56                  | 0.12%              | 0.6               | 0.34%          | 0.31          | 0.31%                     | 0.32                     |
| 284 | 2   | ERBB4 | rs13390226 | 212448106     | 211.92        | 0.08                   | 0.616            | G                | 0.07%                  | 0.63                  | 0.05%              | 0.7               | 0.03%          | 0.74          | 0.17%                     | 0.44                     |
| 285 | 2   | ERBB4 | rs2068401  | 212452431     | 211.94        | 0.42                   | 0.447            | T                | 0.03%                  | 0.77                  | 0.71%              | 0.2               | 0.04%          | 0.73          | 0.00%                     | 0.92                     |
| 286 | 2   | ERBB4 | rs7600260  | 212457852     | 211.95        | 0.13                   | 0.753            | T                | 0.80%                  | 0.126                 | 0.05%              | 0.7               | 1.44%          | 0.03          | 0.80%                     | 0.092                    |
| 287 | 2   | ERBB4 | rs4292044  | 212469397     | 211.99        | 0.09                   | 1.000            | A                | 0.02%                  | 0.81                  | 0.01%              | 0.9               | 0.01%          | 0.87          | 0.20%                     | 0.41                     |
| 288 | 2   | ERBB4 | rs2043888  | 212477024     | 212.02        | 0.13                   | 0.748            | T                | 0.03%                  | 0.78                  | 0.01%              | 0.9               | 0.00%          | 0.93          | 0.00%                     | 0.97                     |
| 289 | 2   | ERBB4 | rs11887994 | 212484167     | 212.04        | 0.33                   | 1.000            | G                | 0.01%                  | 0.85                  | 0.00%              | 0.9               | 1.51%          | 0.02          | 0.50%                     | 0.17                     |
| 290 | 2   | ERBB4 | rs11896200 | 212491048     | 212.06        | 0.03                   | 1.000            | T                | 0.11%                  | 0.57                  | 0.00%              | 1                 | 0.18%          | 0.46          | 0.00%                     | 0.98                     |
| 291 | 2   | ERBB4 | rs7603039  | 212497140     | 212.08        | 0.23                   | 0.404            | A                | 0.05%                  | 0.69                  | 0.03%              | 0.8               | 0.00%          | 0.95          | 0.00%                     | 0.95                     |
| 292 | 2   | ERBB4 | rs10497953 | 212500610     | 212.10        | 0.03                   | 0.190            | T                | 1.30%                  | 0.039                 | 0.01%              | 0.8               | 0.74%          | 0.099         | 0.26%                     | 0.34                     |
| 293 | 2   | ERBB4 | rs7598440  | 212501443     | 212.10        | 0.50                   | 0.386            | T                | 0.14%                  | 0.51                  | 0.05%              | 0.7               | 0.26%          | 0.35          | 0.19%                     | 0.41                     |
| 294 | 2   | ERBB4 | rs1098066  | 212508207     | 212.12        | 0.21                   | 0.384            | T                | 0.02%                  | 0.79                  | 0.05%              | 0.7               | 0.02%          | 0.8           | 0.00%                     | 0.93                     |
| 295 | 2   | ERBB4 | rs839525   | 212523542     | 212.16        | 0.16                   | 1.000            | G                | 0.01%                  | 0.89                  | 0.14%              | 0.5               | 0.09%          | 0.58          | 0.18%                     | 0.41                     |
| 296 | 2   | ERBB4 | rs839517   | 212526022     | 212.16        | 0.23                   | 0.681            | C                | 0.07%                  | 0.65                  | 0.10%              | 0.6               | 0.48%          | 0.2           | 0.50%                     | 0.18                     |
| 297 | 2   | ERBB4 | rs10497955 | 212526746     | 212.16        | 0.02                   | 0.113            | T                | 1.36%                  | 0.027                 | 0.01%              | 0.9               | 0.38%          | 0.24          | 0.02%                     | 0.77                     |
| 298 | 2   | ERBB4 | rs10497956 | 212528430     | 212.16        | 0.04                   | 0.247            | G                | 0.45%                  | 0.39                  | 0.22%              | 0.4               | 0.10%          | 0.61          | 0.01%                     | 0.87                     |

|     | Q                     | R                    | S                  | T                 | U              | V             | W              | X             | Y                 | Z                | AA                    | AB                   | AC                         | AD                        | AE                     | AF                    |
|-----|-----------------------|----------------------|--------------------|-------------------|----------------|---------------|----------------|---------------|-------------------|------------------|-----------------------|----------------------|----------------------------|---------------------------|------------------------|-----------------------|
| 1   | H2_Letter-Number Span | P_Letter-Number Span | H2_Verbal learning | P_Verbal learning | H2_Abstraction | P_Abstraction | H2_Face memory | P_Face memory | H2_Spatial memory | P_Spatial memory | H2_Spatial processing | P_Spatial processing | H2_Sensori-motor dexterity | P_Sensori-motor dexterity | H2_Emotion recognition | P_Emotion recognition |
| 266 | 0.08%                 | 0.6                  | 0.15%              | 0.47              | 0.15%          | 0.5           | 0.09%          | 0.6           | 0.40%             | 0.27             | 0.04%                 | 0.72                 | 0.09%                      | 0.6                       | 0.49%                  | 0.2                   |
| 267 | 0.19%                 | 0.4                  | 0.13%              | 0.5               | 0.05%          | 0.7           | 0.35%          | 0.3           | 0.08%             | 0.61             | 0.06%                 | 0.67                 | 0.00%                      | 1                         | 0.02%                  | 0.8                   |
| 268 | 0.07%                 | 0.6                  | 0.04%              | 0.73              | 0.15%          | 0.5           | 0.05%          | 0.7           | 0.08%             | 0.61             | 0.00%                 | 0.99                 | 0.73%                      | 0.12                      | 0.87%                  | 0.09                  |
| 269 | 0.02%                 | 0.8                  | 1.33%              | 0.031             | 0.12%          | 0.5           | 0.71%          | 0.12          | 0.03%             | 0.74             | 0.04%                 | 0.71                 | 0.18%                      | 0.4                       | 0.12%                  | 0.5                   |
| 270 | 0.11%                 | 0.5                  | 0.88%              | 0.076             | 0.01%          | 0.9           | 0.19%          | 0.4           | 0.18%             | 0.44             | 0.03%                 | 0.74                 | 0.61%                      | 0.15                      | 0.15%                  | 0.5                   |
| 271 | 0.03%                 | 0.8                  | 0.01%              | 0.87              | 0.01%          | 0.9           | 0.06%          | 0.7           | 0.03%             | 0.77             | 0.06%                 | 0.69                 | 0.03%                      | 0.8                       | 0.06%                  | 0.7                   |
| 272 | 0.37%                 | 0.2                  | 0.01%              | 0.82              | 0.59%          | 0.15          | 0.15%          | 0.5           | 0.42%             | 0.23             | 0.12%                 | 0.54                 | 0.31%                      | 0.3                       | 0.00%                  | 1                     |
| 273 | 0.07%                 | 0.6                  | 0.49%              | 0.21              | 0.79%          | 0.12          | 0.00%          | 0.9           | 0.21%             | 0.42             | 0.20%                 | 0.45                 | 3.12%                      | 0.002                     | 0.01%                  | 0.9                   |
| 274 | 0.03%                 | 0.7                  | 0.03%              | 0.76              | 0.06%          | 0.6           | 0.01%          | 0.8           | 0.04%             | 0.7              | 0.23%                 | 0.4                  | 0.23%                      | 0.4                       | 0.00%                  | 0.9                   |
| 275 | 0.52%                 | 0.2                  | 0.21%              | 0.39              | 0.30%          | 0.3           | 0.06%          | 0.7           | 0.07%             | 0.65             | 0.19%                 | 0.45                 | 0.33%                      | 0.3                       | 0.10%                  | 0.6                   |
| 276 | 0.16%                 | 0.5                  | 0.02%              | 0.81              | 0.80%          | 0.1           | 0.01%          | 0.9           | 0.18%             | 0.44             | 0.41%                 | 0.26                 | 0.51%                      | 0.2                       | 0.01%                  | 0.9                   |
| 277 | 0.03%                 | 0.8                  | 0.04%              | 0.7               | 0.19%          | 0.4           | 0.01%          | 0.8           | 0.01%             | 0.84             | 0.00%                 | 0.98                 | 0.03%                      | 0.8                       | 0.00%                  | 0.9                   |
| 278 | 0.04%                 | 0.7                  | 0.14%              | 0.47              | 1.66%          | 0.014         | 0.05%          | 0.7           | 0.36%             | 0.27             | 0.00%                 | 0.99                 | 0.95%                      | 0.07                      | 0.03%                  | 0.8                   |
| 279 | 0.13%                 | 0.5                  | 0.03%              | 0.74              | 1.74%          | 0.012         | 0.45%          | 0.2           | 0.33%             | 0.29             | 0.00%                 | 0.99                 | 1.74%                      | 0.013                     | 0.18%                  | 0.4                   |
| 280 | 0.34%                 | 0.3                  | 0.94%              | 0.069             | 0.02%          | 0.8           | 0.51%          | 0.2           | 0.92%             | 0.087            | 0.30%                 | 0.35                 | 1.08%                      | 0.06                      | 0.10%                  | 0.6                   |
| 281 | 0.10%                 | 0.5                  | 0.35%              | 0.26              | 0.02%          | 0.8           | 0.33%          | 0.3           | 0.02%             | 0.8              | 0.38%                 | 0.28                 | 0.51%                      | 0.2                       | 0.08%                  | 0.6                   |
| 282 | 0.01%                 | 0.9                  | 0.58%              | 0.145             | 0.16%          | 0.5           | 0.05%          | 0.7           | 0.15%             | 0.48             | 0.20%                 | 0.43                 | 0.01%                      | 0.8                       | 0.02%                  | 0.8                   |
| 283 | 0.13%                 | 0.5                  | 0.00%              | 0.95              | 0.01%          | 0.9           | 0.38%          | 0.3           | 0.03%             | 0.74             | 0.11%                 | 0.58                 | 0.00%                      | 1                         | 0.66%                  | 0.14                  |
| 284 | 0.26%                 | 0.3                  | 0.10%              | 0.53              | 0.32%          | 0.3           | 0.03%          | 0.7           | 0.00%             | 0.91             | 0.00%                 | 0.92                 | 0.03%                      | 0.7                       | 0.03%                  | 0.8                   |
| 285 | 0.00%                 | 0.9                  | 0.12%              | 0.55              | 0.06%          | 0.7           | 0.00%          | 0.9           | 0.13%             | 0.54             | 0.77%                 | 0.146                | 0.21%                      | 0.4                       | 0.02%                  | 0.8                   |
| 286 | 0.64%                 | 0.12                 | 0.38%              | 0.23              | 0.36%          | 0.3           | 2.93%          | 0.0014        | 3.56%             | 0.00064          | 0.22%                 | 0.41                 | 1.09%                      | 0.06                      | 1.25%                  | 0.04                  |
| 287 | 0.09%                 | 0.6                  | 0.12%              | 0.51              | 0.03%          | 0.7           | 0.31%          | 0.3           | 0.02%             | 0.77             | 1.13%                 | 0.048                | 0.10%                      | 0.6                       | 0.06%                  | 0.6                   |
| 288 | 0.62%                 | 0.14                 | 0.76%              | 0.108             | 0.09%          | 0.6           | 0.53%          | 0.2           | 0.02%             | 0.8              | 0.46%                 | 0.24                 | 0.37%                      | 0.3                       | 0.54%                  | 0.2                   |
| 289 | 0.45%                 | 0.2                  | 1.80%              | 0.0076            | 0.56%          | 0.2           | 2.94%          | 0.001         | 1.56%             | 0.021            | 1.11%                 | 0.063                | 1.29%                      | 0.03                      | 1.63%                  | 0.02                  |
| 290 | 0.09%                 | 0.6                  | 0.00%              | 0.92              | 0.02%          | 0.8           | 0.03%          | 0.7           | 0.18%             | 0.43             | 0.00%                 | 0.98                 | 0.24%                      | 0.3                       | 0.07%                  | 0.6                   |
| 291 | 0.02%                 | 0.8                  | 0.04%              | 0.71              | 0.02%          | 0.8           | 0.11%          | 0.5           | 0.41%             | 0.23             | 0.00%                 | 0.95                 | 0.01%                      | 0.9                       | 0.02%                  | 0.8                   |
| 292 | 0.39%                 | 0.2                  | 0.80%              | 0.077             | 0.10%          | 0.5           | 0.04%          | 0.7           | 0.36%             | 0.24             | 1.84%                 | 0.0124               | 0.57%                      | 0.13                      | 0.61%                  | 0.12                  |
| 293 | 0.11%                 | 0.5                  | 0.01%              | 0.88              | 0.24%          | 0.3           | 0.01%          | 0.8           | 0.03%             | 0.75             | 0.02%                 | 0.78                 | 0.00%                      | 0.9                       | 0.04%                  | 0.7                   |
| 294 | 0.05%                 | 0.7                  | 0.06%              | 0.64              | 0.01%          | 0.8           | 0.00%          | 0.9           | 0.09%             | 0.57             | 0.04%                 | 0.72                 | 0.02%                      | 0.8                       | 0.04%                  | 0.7                   |
| 295 | 0.68%                 | 0.1                  | 0.13%              | 0.48              | 0.09%          | 0.5           | 0.00%          | 0.9           | 0.38%             | 0.25             | 0.38%                 | 0.26                 | 0.56%                      | 0.14                      | 0.22%                  | 0.3                   |
| 296 | 0.24%                 | 0.3                  | 0.02%              | 0.8               | 0.40%          | 0.2           | 0.01%          | 0.8           | 0.13%             | 0.5              | 0.02%                 | 0.78                 | 0.00%                      | 1                         | 0.14%                  | 0.5                   |
| 297 | 0.29%                 | 0.3                  | 0.56%              | 0.138             | 0.03%          | 0.7           | 0.12%          | 0.5           | 0.18%             | 0.41             | 0.88%                 | 0.088                | 0.06%                      | 0.6                       | 0.12%                  | 0.5                   |
| 298 | 0.48%                 | 0.2                  | 1.66%              | 0.024             | 0.14%          | 0.5           | 0.08%          | 0.6           | 1.17%             | 0.062            | 0.95%                 | 0.111                | 1.13%                      | 0.06                      | 0.15%                  | 0.5                   |

|     | A   | B     | C          | D             | E             | F                      | G                | H                | I                      | J                     | K                  | L                 | M              | N             | O                         | P                        |
|-----|-----|-------|------------|---------------|---------------|------------------------|------------------|------------------|------------------------|-----------------------|--------------------|-------------------|----------------|---------------|---------------------------|--------------------------|
| 1   | Chr | Gene  | SNP ID     | Position (bp) | Position (cM) | Minor allele frequency | Hardy-Weinberg P | Reference allele | H2_Prepulse inhibition | P_Prepulse inhibition | H2_P50 suppression | P_P50 suppression | H2_Antisaccade | P_Antisaccade | H2_Continuous performance | P_Continuous performance |
| 299 | 2   | ERBB4 | rs990741   | 212533818     | 212.16        | 0.19                   | 0.640            | T                | 0.01%                  | 0.87                  | 0.44%              | 0.3               | 0.45%          | 0.22          | 0.66%                     | 0.125                    |
| 300 | 2   | ERBB4 | rs987320   | 212538445     | 212.16        | 0.07                   | 0.539            | A                | 0.01%                  | 0.9                   | 0.72%              | 0.2               | 0.08%          | 0.61          | 1.24%                     | 0.033                    |
| 301 | 2   | ERBB4 | rs2118890  | 212552847     | 212.16        | 0.19                   | 0.631            | T                | 0.07%                  | 0.65                  | 0.02%              | 0.8               | 0.03%          | 0.72          | 0.78%                     | 0.087                    |
| 302 | 2   | ERBB4 | rs1521546  | 212558365     | 212.16        | 0.12                   | 1.000            | C                | 1.12%                  | 0.057                 | 0.01%              | 0.9               | 1.13%          | 0.054         | 0.22%                     | 0.38                     |
| 303 | 2   | ERBB4 | rs12473886 | 212559616     | 212.16        | 0.21                   | 0.191            | G                | 0.11%                  | 0.58                  | 0.05%              | 0.7               | 0.11%          | 0.56          | 0.74%                     | 0.117                    |
| 304 | 2   | ERBB4 | rs1155683  | 212560914     | 212.16        | 0.25                   | 0.237            | C                | 0.16%                  | 0.49                  | 0.14%              | 0.5               | 0.05%          | 0.68          | 0.54%                     | 0.17                     |
| 305 | 2   | ERBB4 | rs1357124  | 212568293     | 212.16        | 0.43                   | 0.007            | G                | 0.08%                  | 0.64                  | 0.05%              | 0.7               | 0.64%          | 0.17          | 0.01%                     | 0.88                     |
| 306 | 2   | ERBB4 | rs1402714  | 212576359     | 212.16        | 0.09                   | 0.350            | C                | 0.00%                  | 0.93                  | 0.03%              | 0.8               | 0.20%          | 0.43          | 0.51%                     | 0.19                     |
| 307 | 2   | ERBB4 | rs1521539  | 212597880     | 212.16        | 0.02                   | 0.001            | C                | 0.14%                  | 0.42                  | 0.03%              | 0.8               | 0.00%          | 0.9           | 0.01%                     | 0.85                     |
| 308 | 2   | ERBB4 | rs7607942  | 212604816     | 212.16        | 0.30                   | 0.604            | A                | 0.27%                  | 0.38                  | 0.65%              | 0.2               | 0.08%          | 0.62          | 0.00%                     | 0.99                     |
| 309 | 2   | ERBB4 | rs1546717  | 212610584     |               | 0.14                   | 0.000            |                  |                        |                       |                    |                   |                |               |                           |                          |
| 310 | 2   | ERBB4 | rs7582903  | 212617082     | 212.16        | 0.32                   | 1.000            | G                | 0.08%                  | 0.62                  | 0.00%              | 1                 | 0.26%          | 0.35          | 0.00%                     | 0.92                     |
| 311 | 2   | ERBB4 | rs9678219  | 212645894     | 212.16        | 0.17                   | 0.791            | C                | 0.44%                  | 0.28                  | 1.83%              | 0.04              | 0.00%          | 0.95          | 0.09%                     | 0.59                     |
| 312 | 2   | ERBB4 | rs1521545  | 212646410     | 212.16        | 0.11                   | 0.046            | A                | 0.09%                  | 0.58                  | 0.35%              | 0.3               | 0.19%          | 0.41          | 0.10%                     | 0.54                     |
| 313 | 2   | ERBB4 | rs1521553  | 212656660     | 212.16        | 0.40                   | 0.647            | A                | 0.16%                  | 0.48                  | 0.03%              | 0.8               | 0.27%          | 0.34          | 0.03%                     | 0.75                     |
| 314 | 2   | ERBB4 | rs7564926  | 212670237     | 212.16        | 0.20                   | 1.000            | A                | 0.00%                  | 0.94                  | 0.02%              | 0.8               | 0.01%          | 0.86          | 0.78%                     | 0.097                    |
| 315 | 2   | ERBB4 | rs2371438  | 212673776     | 212.16        | 0.07                   | 0.604            | A                | 0.22%                  | 0.41                  | 0.11%              | 0.6               | 0.13%          | 0.5           | 0.16%                     | 0.46                     |
| 316 | 2   | ERBB4 | rs11903314 | 212688244     | 212.16        | 0.05                   | 0.283            | G                | 0.53%                  | 0.18                  | 0.18%              | 0.5               | 0.04%          | 0.72          | 0.08%                     | 0.59                     |
| 317 | 2   | ERBB4 | rs7426206  | 212692700     | 212.16        | 0.35                   | 0.525            | A                | 0.08%                  | 0.64                  | 1.06%              | 0.07              | 0.34%          | 0.3           | 0.38%                     | 0.26                     |
| 318 | 2   | ERBB4 | rs1568519  | 212714637     | 212.16        | 0.07                   | 1.000            | T                | 0.08%                  | 0.65                  | 0.00%              | 1                 | 0.09%          | 0.6           | 0.07%                     | 0.63                     |
| 319 | 2   | ERBB4 | rs7579746  | 212725217     | 212.16        | 0.06                   | 0.135            | T                | 0.42%                  | 0.26                  | 0.75%              | 0.2               | 0.00%          | 0.96          | 0.10%                     | 0.55                     |
| 320 | 2   | ERBB4 | rs1357142  | 212725707     | 212.16        | 0.29                   | 0.056            | C                | 0.00%                  | 0.97                  | 0.00%              | 0.9               | 0.00%          | 0.98          | 0.22%                     | 0.39                     |
| 321 | 2   | ERBB4 | rs6737841  | 212729291     | 212.16        | 0.01                   | 1.000            | A                | 0.09%                  | 0.65                  | 0.09%              | 0.6               | 0.20%          | 0.55          | 0.16%                     | 0.48                     |
| 322 | 2   | ERBB4 | rs1521657  | 212731683     | 212.16        | 0.24                   | 0.843            | G                | 0.28%                  | 0.36                  | 0.00%              | 1                 | 0.10%          | 0.56          | 0.00%                     | 0.98                     |
| 323 | 2   | ERBB4 | rs939664   | 212746332     | 212.16        | 0.40                   | 0.546            | C                | 0.18%                  | 0.49                  | 0.02%              | 0.8               | 0.35%          | 0.3           | 0.05%                     | 0.69                     |
| 324 | 2   | ERBB4 | rs10497961 | 212751316     | 212.16        | 0.07                   | 0.287            | G                | 0.05%                  | 0.67                  | 0.19%              | 0.4               | 0.00%          | 0.98          | 0.00%                     | 0.96                     |
| 325 | 2   | ERBB4 | rs1521646  | 212752500     | 212.16        | 0.49                   | 0.558            | G                | 0.63%                  | 0.2                   | 0.59%              | 0.2               | 0.20%          | 0.45          | 0.06%                     | 0.65                     |
| 326 | 2   | ERBB4 | rs1915745  | 212753019     | 212.16        | 0.16                   | 0.580            | A                | 0.46%                  | 0.26                  | 0.85%              | 0.14              | 0.05%          | 0.71          | 0.85%                     | 0.104                    |
| 327 | 2   | ERBB4 | rs7608095  | 212778696     | 212.16        | 0.34                   | 1.000            | C                | 0.33%                  | 0.34                  | 0.18%              | 0.5               | 0.06%          | 0.68          | 0.19%                     | 0.44                     |
| 328 | 2   | ERBB4 | rs2049180  | 212789985     | 212.16        | 0.49                   | 0.663            | G                | 1.44%                  | 0.043                 | 1.19%              | 0.07              | 0.00%          | 0.94          | 0.51%                     | 0.2                      |
| 329 | 2   | ERBB4 | rs9288446  | 212790272     | 212.16        | 0.24                   | 0.838            | C                | 0.59%                  | 0.18                  | 0.03%              | 0.8               | 0.00%          | 0.98          | 0.59%                     | 0.16                     |
| 330 | 2   | ERBB4 | rs1521641  | 212802134     | 212.16        | 0.41                   | 0.881            | G                | 1.24%                  | 0.058                 | 0.00%              | 1                 | 0.00%          | 0.96          | 0.35%                     | 0.29                     |
| 331 | 2   | ERBB4 | rs1948875  | 212830963     | 212.16        | 0.42                   | 0.556            | A                | 0.78%                  | 0.126                 | 0.84%              | 0.2               | 0.00%          | 0.93          | 0.64%                     | 0.145                    |

|     | Q                     | R                    | S                  | T                 | U              | V             | W              | X             | Y                 | Z                | AA                    | AB                   | AC                         | AD                        | AE                     | AF                    |
|-----|-----------------------|----------------------|--------------------|-------------------|----------------|---------------|----------------|---------------|-------------------|------------------|-----------------------|----------------------|----------------------------|---------------------------|------------------------|-----------------------|
| 1   | H2_Letter-Number Span | P_Letter-Number Span | H2_Verbal learning | P_Verbal learning | H2_Abstraction | P_Abstraction | H2_Face memory | P_Face memory | H2_Spatial memory | P_Spatial memory | H2_Spatial processing | P_Spatial processing | H2_Sensori-motor dexterity | P_Sensori-motor dexterity | H2_Emotion recognition | P_Emotion recognition |
| 299 | 0.01%                 | 0.9                  | 0.10%              | 0.54              | 0.22%          | 0.4           | 0.02%          | 0.8           | 0.62%             | 0.137            | 0.33%                 | 0.3                  | 1.51%                      | 0.02                      | 0.00%                  | 0.9                   |
| 300 | 0.47%                 | 0.2                  | 0.00%              | 0.98              | 0.02%          | 0.8           | 0.08%          | 0.6           | 0.01%             | 0.89             | 0.00%                 | 0.97                 | 1.07%                      | 0.05                      | 0.18%                  | 0.4                   |
| 301 | 0.00%                 | 1                    | 0.02%              | 0.8               | 0.29%          | 0.3           | 0.00%          | 0.9           | 0.00%             | 0.93             | 0.00%                 | 0.92                 | 0.09%                      | 0.6                       | 0.17%                  | 0.4                   |
| 302 | 0.00%                 | 1                    | 0.06%              | 0.63              | 0.34%          | 0.3           | 0.02%          | 0.8           | 0.07%             | 0.61             | 0.01%                 | 0.84                 | 0.66%                      | 0.09                      | 0.11%                  | 0.5                   |
| 303 | 0.07%                 | 0.5                  | 0.07%              | 0.63              | 0.01%          | 0.8           | 0.01%          | 0.8           | 0.07%             | 0.64             | 0.49%                 | 0.22                 | 1.25%                      | 0.04                      | 0.00%                  | 1                     |
| 304 | 1.08%                 | 0.05                 | 0.00%              | 0.94              | 0.14%          | 0.5           | 0.14%          | 0.5           | 0.07%             | 0.61             | 0.44%                 | 0.24                 | 0.09%                      | 0.6                       | 0.00%                  | 1                     |
| 305 | 0.00%                 | 0.9                  | 0.06%              | 0.66              | 0.35%          | 0.2           | 0.00%          | 0.9           | 0.04%             | 0.74             | 0.09%                 | 0.6                  | 0.00%                      | 1                         | 0.28%                  | 0.3                   |
| 306 | 0.12%                 | 0.5                  | 0.10%              | 0.54              | 0.02%          | 0.8           | 0.30%          | 0.3           | 0.08%             | 0.61             | 0.16%                 | 0.47                 | 0.09%                      | 0.6                       | 0.36%                  | 0.3                   |
| 307 | 0.30%                 | 0.3                  | 0.14%              | 0.37              | 0.01%          | 0.8           | 0.07%          | 0.5           | 0.10%             | 0.45             | 0.40%                 | 0.16                 | 0.01%                      | 0.8                       | 0.03%                  | 0.7                   |
| 308 | 0.07%                 | 0.6                  | 0.27%              | 0.34              | 0.48%          | 0.2           | 0.00%          | 0.9           | 0.04%             | 0.72             | 0.83%                 | 0.114                | 0.94%                      | 0.07                      | 0.01%                  | 0.8                   |
| 309 |                       |                      |                    |                   |                |               |                |               |                   |                  |                       |                      |                            |                           |                        |                       |
| 310 | 0.15%                 | 0.5                  | 0.05%              | 0.65              | 0.52%          | 0.2           | 0.07%          | 0.6           | 0.02%             | 0.81             | 0.07%                 | 0.62                 | 0.04%                      | 0.7                       | 0.46%                  | 0.2                   |
| 311 | 0.02%                 | 0.8                  | 0.21%              | 0.39              | 0.20%          | 0.4           | 0.01%          | 0.9           | 0.03%             | 0.76             | 0.77%                 | 0.131                | 0.01%                      | 0.8                       | 0.20%                  | 0.4                   |
| 312 | 0.81%                 | 0.08                 | 0.01%              | 0.83              | 0.14%          | 0.5           | 0.04%          | 0.7           | 0.32%             | 0.28             | 0.38%                 | 0.26                 | 0.31%                      | 0.3                       | 0.11%                  | 0.5                   |
| 313 | 0.52%                 | 0.2                  | 0.37%              | 0.23              | 0.06%          | 0.6           | 0.03%          | 0.7           | 0.32%             | 0.29             | 0.08%                 | 0.61                 | 0.33%                      | 0.3                       | 0.01%                  | 0.8                   |
| 314 | 0.37%                 | 0.2                  | 0.02%              | 0.77              | 3.12%          | 0.0015        | 0.81%          | 0.11          | 0.12%             | 0.51             | 0.01%                 | 0.86                 | 0.31%                      | 0.3                       | 0.24%                  | 0.4                   |
| 315 | 0.29%                 | 0.3                  | 0.15%              | 0.45              | 0.00%          | 0.9           | 0.07%          | 0.6           | 0.07%             | 0.63             | 0.08%                 | 0.62                 | 0.85%                      | 0.11                      | 0.02%                  | 0.8                   |
| 316 | 0.13%                 | 0.5                  | 0.14%              | 0.45              | 0.14%          | 0.4           | 0.01%          | 0.9           | 0.17%             | 0.44             | 0.12%                 | 0.53                 | 0.02%                      | 0.8                       | 0.00%                  | 1                     |
| 317 | 0.04%                 | 0.7                  | 0.02%              | 0.81              | 0.02%          | 0.8           | 0.51%          | 0.2           | 0.00%             | 0.96             | 0.16%                 | 0.48                 | 0.17%                      | 0.4                       | 0.29%                  | 0.3                   |
| 318 | 0.21%                 | 0.4                  | 0.21%              | 0.4               | 0.29%          | 0.3           | 0.01%          | 0.8           | 0.49%             | 0.21             | 0.33%                 | 0.33                 | 0.06%                      | 0.7                       | 0.78%                  | 0.11                  |
| 319 | 0.02%                 | 0.8                  | 0.62%              | 0.115             | 0.06%          | 0.6           | 0.49%          | 0.2           | 0.26%             | 0.34             | 0.05%                 | 0.68                 | 0.50%                      | 0.2                       | 0.03%                  | 0.8                   |
| 320 | 0.35%                 | 0.3                  | 0.12%              | 0.51              | 0.00%          | 0.9           | 0.00%          | 1             | 0.48%             | 0.21             | 0.56%                 | 0.2                  | 0.35%                      | 0.3                       | 0.33%                  | 0.3                   |
| 321 | 0.02%                 | 0.8                  | 0.12%              | 0.5               | 0.38%          | 0.2           | 0.28%          | 0.3           | 0.00%             | 0.91             | 0.80%                 | 0.14                 | 0.03%                      | 0.8                       | 0.00%                  | 1                     |
| 322 | 0.10%                 | 0.5                  | 0.47%              | 0.2               | 0.15%          | 0.5           | 0.48%          | 0.2           | 0.23%             | 0.38             | 0.64%                 | 0.16                 | 1.25%                      | 0.04                      | 0.15%                  | 0.5                   |
| 323 | 1.08%                 | 0.06                 | 0.18%              | 0.43              | 0.01%          | 0.9           | 0.24%          | 0.4           | 0.02%             | 0.8              | 0.05%                 | 0.72                 | 0.07%                      | 0.6                       | 0.16%                  | 0.5                   |
| 324 | 0.13%                 | 0.5                  | 0.13%              | 0.47              | 0.26%          | 0.4           | 0.15%          | 0.5           | 0.12%             | 0.51             | 0.07%                 | 0.63                 | 0.01%                      | 0.9                       | 0.09%                  | 0.6                   |
| 325 | 0.00%                 | 0.9                  | 0.30%              | 0.32              | 0.06%          | 0.7           | 0.23%          | 0.4           | 0.01%             | 0.85             | 0.02%                 | 0.82                 | 0.03%                      | 0.8                       | 0.02%                  | 0.8                   |
| 326 | 0.02%                 | 0.8                  | 0.02%              | 0.82              | 0.19%          | 0.4           | 0.51%          | 0.2           | 0.25%             | 0.39             | 0.24%                 | 0.41                 | 0.08%                      | 0.6                       | 0.34%                  | 0.3                   |
| 327 | 0.12%                 | 0.5                  | 0.21%              | 0.4               | 0.65%          | 0.13          | 0.01%          | 0.9           | 0.01%             | 0.84             | 0.00%                 | 0.96                 | 0.06%                      | 0.6                       | 0.04%                  | 0.7                   |
| 328 | 0.00%                 | 0.9                  | 0.00%              | 0.94              | 0.16%          | 0.4           | 0.03%          | 0.7           | 0.26%             | 0.36             | 0.05%                 | 0.71                 | 0.20%                      | 0.4                       | 1.44%                  | 0.03                  |
| 329 | 0.05%                 | 0.7                  | 0.02%              | 0.76              | 0.08%          | 0.6           | 0.23%          | 0.4           | 0.49%             | 0.19             | 0.02%                 | 0.8                  | 0.57%                      | 0.2                       | 0.00%                  | 1                     |
| 330 | 0.00%                 | 1                    | 0.01%              | 0.83              | 0.00%          | 0.9           | 0.35%          | 0.3           | 0.71%             | 0.135            | 0.07%                 | 0.64                 | 0.30%                      | 0.5                       | 0.11%                  | 0.6                   |
| 331 | 0.16%                 | 0.5                  | 0.01%              | 0.88              | 0.03%          | 0.7           | 0.17%          | 0.4           | 0.10%             | 0.56             | 0.03%                 | 0.75                 | 0.07%                      | 0.6                       | 0.04%                  | 0.7                   |

|     | A   | B      | C          | D             | E             | F                      | G                | H                | I                      | J                     | K                  | L                 | M              | N             | O                         | P                        |
|-----|-----|--------|------------|---------------|---------------|------------------------|------------------|------------------|------------------------|-----------------------|--------------------|-------------------|----------------|---------------|---------------------------|--------------------------|
| 1   | Chr | Gene   | SNP ID     | Position (bp) | Position (cM) | Minor allele frequency | Hardy-Weinberg P | Reference allele | H2_Prepulse inhibition | P_Prepulse inhibition | H2_P50 suppression | P_P50 suppression | H2_Antisaccade | P_Antisaccade | H2_Continuous performance | P_Continuous performance |
| 332 | 2   | ERBB4  | rs1021916  | 212841067     | 212.16        | 0.01                   | 1.000            | C                | 0.06%                  | 0.68                  | 0.00%              | 0.9               | 0.06%          | 0.67          | 0.14%                     | 0.52                     |
| 333 | 2   | ERBB4  | rs2135161  | 212844992     | 212.16        | 0.15                   | 0.765            | A                | 0.22%                  | 0.44                  | 0.88%              | 0.15              | 0.10%          | 0.58          | 0.05%                     | 0.7                      |
| 334 | 2   | ERBB4  | rs1568516  | 212850372     | 212.16        | 0.03                   | 1.000            | A                | 0.24%                  | 0.41                  | 0.30%              | 0.4               | 0.04%          | 0.71          | 0.05%                     | 0.69                     |
| 335 | 2   | ERBB4  | rs953831   | 212859060     | 212.16        | 0.20                   | 0.639            | A                | 0.01%                  | 0.88                  | 2.23%              | 0.03              | 0.10%          | 0.59          | 0.29%                     | 0.34                     |
| 336 | 2   | ERBB4  | rs1857795  | 212873152     | 212.16        | 0.11                   | 0.722            | G                | 0.31%                  | 0.35                  | 1.15%              | 0.1               | 0.00%          | 0.96          | 0.08%                     | 0.6                      |
| 337 | 2   | ERBB4  | rs1505344  | 212875519     | 212.16        | 0.38                   | 0.275            | A                | 0.03%                  | 0.75                  | 0.69%              | 0.2               | 0.16%          | 0.47          | 0.52%                     | 0.18                     |
| 338 | 2   | ERBB4  | rs1910866  | 212891941     | 212.16        | 0.18                   | 0.047            | T                | 0.01%                  | 0.84                  | 0.00%              | 1                 | 0.04%          | 0.72          | 0.00%                     | 0.92                     |
| 339 | 2   | ERBB4  | rs1505366  | 212899634     | 212.16        | 0.06                   | 0.013            | G                | 1.02%                  | 0.056                 | 0.00%              | 0.9               | 0.07%          | 0.6           | 0.08%                     | 0.58                     |
| 340 | 2   | ERBB4  | rs1505374  | 212900905     | 212.16        | 0.07                   | 1.000            | A                | 0.39%                  | 0.27                  | 0.51%              | 0.2               | 0.18%          | 0.44          | 0.39%                     | 0.24                     |
| 341 | 2   | ERBB4  | rs1394785  | 212919219     | 212.16        | 0.29                   | 0.385            | C                | 1.97%                  | 0.023                 | 2.91%              | 0.006             | 0.24%          | 0.43          | 1.52%                     | 0.028                    |
| 342 | 2   | ERBB4  | rs1505360  | 212920375     | 212.16        | 0.42                   | 1.000            | G                | 1.31%                  | 0.063                 | 0.19%              | 0.5               | 0.56%          | 0.2           | 0.02%                     | 0.82                     |
| 343 | 2   | ERBB4  | rs10497971 | 212933104     | 212.16        | 0.18                   | 0.141            | C                | 0.25%                  | 0.39                  | 0.01%              | 0.9               | 0.05%          | 0.7           | 0.13%                     | 0.51                     |
| 344 | 2   | ERBB4  | rs10497972 | 212933541     | 212.16        | 0.11                   | 0.251            | G                | 0.00%                  | 0.96                  | 1.13%              | 0.08              | 0.00%          | 0.92          | 0.71%                     | 0.107                    |
| 345 | 2   | ERBB4  | rs11892564 | 212934789     | 212.16        | 0.25                   | 0.233            | A                | 0.03%                  | 0.74                  | 0.01%              | 0.9               | 0.62%          | 0.137         | 0.28%                     | 0.31                     |
| 346 | 2   | ERBB4  | rs4511675  | 212941984     | 212.16        | 0.35                   | 0.748            | G                | 0.06%                  | 0.67                  | 0.17%              | 0.5               | 0.28%          | 0.34          | 0.42%                     | 0.23                     |
| 347 | 2   | ERBB4  | rs1394795  | 212947747     | 212.16        | 0.05                   | 0.099            | T                | 0.01%                  | 0.86                  | 0.72%              | 0.2               | 0.01%          | 0.86          | 1.30%                     | 0.033                    |
| 348 | 2   | ERBB4  | rs7575393  | 212970360     | 212.16        | 0.21                   | 0.395            | T                | 0.51%                  | 0.21                  | 0.14%              | 0.5               | 0.01%          | 0.85          | 0.89%                     | 0.075                    |
| 349 | 2   | ERBB4  | rs1394796  | 212978672     | 212.16        | 0.23                   | 0.062            | C                | 0.14%                  | 0.52                  | 0.33%              | 0.3               | 0.77%          | 0.119         | 0.00%                     | 0.94                     |
| 350 | 2   | ERBB4  | rs1283310  | 212982136     | 212.16        | 0.43                   | 0.771            | G                | 0.07%                  | 0.66                  | 0.12%              | 0.6               | 0.09%          | 0.59          | 0.13%                     | 0.51                     |
| 351 | 2   | ERBB4  | rs13383863 | 212992266     | 212.16        | 0.09                   | 0.673            | T                | 0.16%                  | 0.48                  | 0.03%              | 0.8               | 0.03%          | 0.75          | 0.03%                     | 0.73                     |
| 352 | 2   | ERBB4  | rs7570330  | 212997889     | 212.16        | 0.18                   | 0.130            | C                | 0.04%                  | 0.73                  | 0.12%              | 0.6               | 0.73%          | 0.12          | 0.04%                     | 0.69                     |
| 353 | 2   | ERBB4  | rs1505349  | 212999751     | 212.16        | 0.15                   | 0.036            | A                | 0.08%                  | 0.62                  | 0.22%              | 0.4               | 1.11%          | 0.06          | 0.57%                     | 0.18                     |
| 354 | 2   | ERBB4  | rs2062930  | 213021330     | 212.16        | 0.39                   | 0.218            | G                | 0.16%                  | 0.5                   | 0.19%              | 0.5               | 0.31%          | 0.33          | 0.96%                     | 0.078                    |
| 355 | 2   | ERBB4  | rs1505372  | 213024715     | 212.16        | 0.24                   | 0.553            | A                | 0.15%                  | 0.5                   | 0.27%              | 0.4               | 0.05%          | 0.71          | 0.30%                     | 0.32                     |
| 356 | 2   | ERBB4  | rs972489   | 213025126     | 212.16        | 0.17                   | 0.789            | T                | 0.04%                  | 0.71                  | 0.01%              | 0.8               | 1.59%          | 0.021         | 0.22%                     | 0.39                     |
| 357 | 2   | ERBB4  | rs7564771  | 213031181     | 212.16        | 0.18                   | 0.187            | G                | 0.04%                  | 0.72                  | 0.35%              | 0.3               | 2.14%          | 0.0054        | 0.24%                     | 0.35                     |
| 358 | 2   | ERBB4  | rs6435706  | 213046909     | 212.16        | 0.04                   | 1.000            | G                | 0.50%                  | 0.23                  | 0.75%              | 0.14              | 0.05%          | 0.66          | 0.09%                     | 0.59                     |
| 359 | 2   | ERBB4  | rs10497974 | 213048055     | 212.16        | 0.03                   | 1.000            | A                | 0.12%                  | 0.58                  | 0.08%              | 0.7               | 0.01%          | 0.86          | 0.10%                     | 0.54                     |
| 360 | 2   | ERBB4  | rs6752299  | 213056612     | 212.16        | 0.04                   | 1.000            | C                | 0.17%                  | 0.47                  | 0.00%              | 0.9               | 0.18%          | 0.42          | 0.01%                     | 0.89                     |
| 361 | 2   | ERBB4  | rs1384295  | 213093389     | 212.16        | 0.47                   | 0.382            | A                | 0.10%                  | 0.57                  | 0.06%              | 0.7               | 0.31%          | 0.31          | 0.18%                     | 0.43                     |
| 362 | 3   | SLC6A1 | rs1728818  | 11007992      | 28.77         | 0.44                   | 0.883            | G                | 0.00%                  | 0.92                  | 0.45%              | 0.3               | 0.11%          | 0.54          | 0.13%                     | 0.49                     |
| 363 | 3   | SLC6A1 | rs1710887  | 11014960      | 28.79         | 0.34                   | 0.267            | G                | 0.28%                  | 0.35                  | 0.07%              | 0.7               | 0.10%          | 0.57          | 0.49%                     | 0.21                     |
| 364 | 3   | SLC6A1 | rs1568074  | 11016308      | 28.79         | 0.46                   | 0.661            | A                | 0.01%                  | 0.87                  | 0.34%              | 0.4               | 0.01%          | 0.88          | 0.25%                     | 0.37                     |

|     | Q                     | R                    | S                  | T                 | U              | V             | W              | X             | Y                 | Z                | AA                    | AB                   | AC                         | AD                        | AE                     | AF                    |
|-----|-----------------------|----------------------|--------------------|-------------------|----------------|---------------|----------------|---------------|-------------------|------------------|-----------------------|----------------------|----------------------------|---------------------------|------------------------|-----------------------|
| 1   | H2_Letter-Number Span | P_Letter-Number Span | H2_Verbal learning | P_Verbal learning | H2_Abstraction | P_Abstraction | H2_Face memory | P_Face memory | H2_Spatial memory | P_Spatial memory | H2_Spatial processing | P_Spatial processing | H2_Sensori-motor dexterity | P_Sensori-motor dexterity | H2_Emotion recognition | P_Emotion recognition |
| 332 | 0.16%                 | 0.4                  | 0.06%              | 0.64              | 0.02%          | 0.8           | 0.02%          | 0.8           | 0.33%             | 0.32             | 0.08%                 | 0.65                 | 0.00%                      | 1                         | 0.34%                  | 0.3                   |
| 333 | 0.06%                 | 0.6                  | 0.09%              | 0.58              | 0.14%          | 0.5           | 0.20%          | 0.4           | 0.43%             | 0.23             | 0.46%                 | 0.24                 | 1.40%                      | 0.03                      | 0.60%                  | 0.14                  |
| 334 | 0.01%                 | 0.9                  | 1.33%              | 0.033             | 0.89%          | 0.08          | 0.29%          | 0.3           | 0.16%             | 0.45             | 0.00%                 | 0.99                 | 0.03%                      | 0.7                       | 0.23%                  | 0.4                   |
| 335 | 0.15%                 | 0.5                  | 0.24%              | 0.37              | 0.17%          | 0.4           | 0.38%          | 0.2           | 0.21%             | 0.4              | 0.44%                 | 0.24                 | 0.01%                      | 0.9                       | 0.01%                  | 0.9                   |
| 336 | 0.04%                 | 0.7                  | 0.03%              | 0.74              | 0.11%          | 0.5           | 0.10%          | 0.6           | 0.26%             | 0.35             | 0.12%                 | 0.54                 | 0.90%                      | 0.1                       | 0.07%                  | 0.7                   |
| 337 | 0.12%                 | 0.5                  | 0.04%              | 0.69              | 0.02%          | 0.8           | 0.28%          | 0.3           | 0.00%             | 0.97             | 0.20%                 | 0.43                 | 0.00%                      | 0.9                       | 0.21%                  | 0.4                   |
| 338 | 0.25%                 | 0.4                  | 0.00%              | 0.98              | 0.18%          | 0.4           | 0.60%          | 0.15          | 0.05%             | 0.68             | 0.07%                 | 0.63                 | 0.03%                      | 0.8                       | 0.08%                  | 0.6                   |
| 339 | 0.00%                 | 0.9                  | 0.04%              | 0.69              | 0.07%          | 0.6           | 0.00%          | 1             | 0.02%             | 0.81             | 0.05%                 | 0.69                 | 0.45%                      | 0.2                       | 0.63%                  | 0.14                  |
| 340 | 0.38%                 | 0.3                  | 0.25%              | 0.34              | 0.05%          | 0.7           | 0.02%          | 0.8           | 0.03%             | 0.74             | 0.01%                 | 0.85                 | 0.20%                      | 0.4                       | 0.01%                  | 0.9                   |
| 341 | 0.23%                 | 0.4                  | 0.15%              | 0.48              | 0.03%          | 0.8           | 0.04%          | 0.7           | 0.15%             | 0.5              | 0.45%                 | 0.26                 | 0.00%                      | 0.9                       | 0.01%                  | 0.9                   |
| 342 | 0.06%                 | 0.6                  | 0.18%              | 0.44              | 0.02%          | 0.8           | 0.01%          | 0.8           | 0.00%             | 0.91             | 0.02%                 | 0.81                 | 0.30%                      | 0.3                       | 0.53%                  | 0.2                   |
| 343 | 0.00%                 | 1                    | 0.28%              | 0.32              | 0.11%          | 0.5           | 0.39%          | 0.2           | 0.33%             | 0.3              | 0.11%                 | 0.57                 | 0.55%                      | 0.2                       | 0.17%                  | 0.4                   |
| 344 | 0.00%                 | 0.9                  | 0.27%              | 0.3               | 0.06%          | 0.7           | 0.15%          | 0.5           | 0.04%             | 0.69             | 0.85%                 | 0.095                | 0.84%                      | 0.08                      | 0.08%                  | 0.6                   |
| 345 | 0.25%                 | 0.4                  | 0.24%              | 0.32              | 0.00%          | 1             | 0.05%          | 0.7           | 0.02%             | 0.81             | 0.33%                 | 0.3                  | 0.33%                      | 0.3                       | 0.09%                  | 0.6                   |
| 346 | 0.04%                 | 0.7                  | 0.34%              | 0.27              | 0.19%          | 0.4           | 0.49%          | 0.2           | 0.00%             | 0.93             | 0.04%                 | 0.73                 | 0.41%                      | 0.2                       | 0.78%                  | 0.1                   |
| 347 | 0.01%                 | 0.8                  | 0.22%              | 0.36              | 0.25%          | 0.3           | 0.56%          | 0.2           | 0.02%             | 0.81             | 0.14%                 | 0.53                 | 0.08%                      | 0.6                       | 1.53%                  | 0.02                  |
| 348 | 0.12%                 | 0.5                  | 0.03%              | 0.73              | 0.06%          | 0.6           | 0.01%          | 0.8           | 0.01%             | 0.88             | 0.01%                 | 0.85                 | 0.17%                      | 0.4                       | 0.06%                  | 0.6                   |
| 349 | 0.05%                 | 0.7                  | 0.22%              | 0.36              | 0.00%          | 1             | 0.01%          | 0.9           | 0.65%             | 0.135            | 0.00%                 | 0.94                 | 0.01%                      | 0.8                       | 0.01%                  | 0.9                   |
| 350 | 0.05%                 | 0.7                  | 0.02%              | 0.79              | 0.29%          | 0.3           | 0.00%          | 0.9           | 0.01%             | 0.86             | 0.04%                 | 0.74                 | 0.01%                      | 0.8                       | 0.72%                  | 0.12                  |
| 351 | 0.17%                 | 0.5                  | 0.25%              | 0.34              | 0.00%          | 1             | 0.00%          | 0.9           | 0.11%             | 0.54             | 0.03%                 | 0.77                 | 0.01%                      | 0.9                       | 0.56%                  | 0.2                   |
| 352 | 0.07%                 | 0.6                  | 0.33%              | 0.26              | 0.05%          | 0.7           | 0.01%          | 0.9           | 0.82%             | 0.09             | 0.02%                 | 0.82                 | 0.00%                      | 1                         | 0.02%                  | 0.8                   |
| 353 | 0.28%                 | 0.3                  | 0.03%              | 0.75              | 0.00%          | 0.9           | 0.03%          | 0.7           | 0.40%             | 0.25             | 0.27%                 | 0.37                 | 0.60%                      | 0.2                       | 0.05%                  | 0.7                   |
| 354 | 0.40%                 | 0.2                  | 0.14%              | 0.49              | 0.07%          | 0.6           | 0.18%          | 0.4           | 0.00%             | 0.96             | 0.52%                 | 0.21                 | 0.00%                      | 0.9                       | 0.06%                  | 0.7                   |
| 355 | 0.12%                 | 0.5                  | 0.04%              | 0.7               | 0.35%          | 0.3           | 0.00%          | 0.9           | 0.52%             | 0.2              | 0.03%                 | 0.76                 | 0.36%                      | 0.2                       | 0.10%                  | 0.5                   |
| 356 | 0.03%                 | 0.7                  | 0.32%              | 0.28              | 0.13%          | 0.5           | 0.19%          | 0.4           | 0.50%             | 0.19             | 0.00%                 | 0.96                 | 0.07%                      | 0.6                       | 0.43%                  | 0.2                   |
| 357 | 1.53%                 | 0.01                 | 0.03%              | 0.74              | 0.00%          | 0.9           | 0.42%          | 0.2           | 0.15%             | 0.46             | 0.05%                 | 0.69                 | 0.11%                      | 0.5                       | 0.43%                  | 0.2                   |
| 358 | 0.07%                 | 0.6                  | 0.44%              | 0.2               | 0.03%          | 0.7           | 0.14%          | 0.4           | 0.51%             | 0.2              | 0.83%                 | 0.123                | 0.02%                      | 0.8                       | 0.00%                  | 0.9                   |
| 359 | 0.20%                 | 0.4                  | 0.03%              | 0.73              | 0.52%          | 0.2           | 0.31%          | 0.3           | 0.20%             | 0.41             | 0.36%                 | 0.27                 | 0.05%                      | 0.7                       | 0.29%                  | 0.3                   |
| 360 | 0.02%                 | 0.8                  | 0.21%              | 0.38              | 0.00%          | 1             | 0.03%          | 0.7           | 0.27%             | 0.33             | 0.01%                 | 0.85                 | 0.03%                      | 0.7                       | 0.01%                  | 0.8                   |
| 361 | 0.00%                 | 0.9                  | 0.01%              | 0.88              | 0.06%          | 0.7           | 0.24%          | 0.4           | 0.00%             | 0.94             | 0.17%                 | 0.46                 | 0.06%                      | 0.7                       | 0.06%                  | 0.6                   |
| 362 | 0.00%                 | 0.9                  | 0.03%              | 0.73              | 0.38%          | 0.2           | 0.66%          | 0.12          | 0.22%             | 0.38             | 0.31%                 | 0.32                 | 1.03%                      | 0.05                      | 0.00%                  | 0.9                   |
| 363 | 0.09%                 | 0.6                  | 0.46%              | 0.2               | 0.18%          | 0.4           | 0.00%          | 0.9           | 0.24%             | 0.37             | 0.09%                 | 0.6                  | 0.00%                      | 1                         | 0.00%                  | 1                     |
| 364 | 0.20%                 | 0.4                  | 0.03%              | 0.76              | 0.01%          | 0.8           | 1.50%          | 0.02          | 0.77%             | 0.119            | 0.91%                 | 0.102                | 0.00%                      | 0.9                       | 0.01%                  | 0.9                   |

|     | A   | B      | C          | D             | E             | F                      | G                | H                | I                      | J                     | K                  | L                 | M              | N             | O                         | P                        |
|-----|-----|--------|------------|---------------|---------------|------------------------|------------------|------------------|------------------------|-----------------------|--------------------|-------------------|----------------|---------------|---------------------------|--------------------------|
| 1   | Chr | Gene   | SNP ID     | Position (bp) | Position (cM) | Minor allele frequency | Hardy-Weinberg P | Reference allele | H2_Prepulse inhibition | P_Prepulse inhibition | H2_P50 suppression | P_P50 suppression | H2_Antisaccade | P_Antisaccade | H2_Continuous performance | P_Continuous performance |
| 365 | 3   | SLC6A1 | rs1710891  | 11024133      | 28.81         | 0.41                   | 1.000            | C                | 0.42%                  | 0.27                  | 0.91%              | 0.13              | 0.05%          | 0.7           | 0.06%                     | 0.67                     |
| 366 | 3   | SLC6A1 | rs2697144  | 11026099      | 28.81         | 0.20                   | 0.190            | A                | 0.20%                  | 0.42                  | 0.14%              | 0.5               | 0.08%          | 0.6           | 0.03%                     | 0.73                     |
| 367 | 3   | SLC6A1 | rs2930154  | 11028389      | 28.82         | 0.21                   | 1.000            | C                | 0.18%                  | 0.5                   | 1.39%              | 0.07              | 0.07%          | 0.66          | 0.15%                     | 0.5                      |
| 368 | 3   | SLC6A1 | rs6778281  | 11028517      | 28.82         | 0.09                   | 0.168            | C                | 0.06%                  | 0.68                  | 0.00%              | 0.9               | 0.07%          | 0.63          | 0.17%                     | 0.44                     |
| 369 | 3   | SLC6A1 | rs1170695  | 11030338      | 28.82         | 0.31                   | 0.302            | T                | 0.18%                  | 0.47                  | 1.19%              | 0.08              | 0.15%          | 0.5           | 0.01%                     | 0.82                     |
| 370 | 3   | SLC6A1 | rs9876005  | 11037763      | 28.84         | 0.05                   | 0.002            | A                | 0.00%                  | 0.93                  | 0.03%              | 0.7               | 2.08%          | 0.0101        | 0.09%                     | 0.55                     |
| 371 | 3   | SLC6A1 | rs1728802  | 11041520      | 28.85         | 0.09                   | 0.635            | G                | 0.05%                  | 0.69                  | 0.04%              | 0.7               | 0.09%          | 0.61          | 0.35%                     | 0.3                      |
| 372 | 3   | SLC6A1 | rs10510403 | 11041670      | 28.85         | 0.16                   | 0.303            | A                | 0.50%                  | 0.23                  | 1.10%              | 0.11              | 0.03%          | 0.76          | 0.64%                     | 0.16                     |
| 373 | 3   | SLC6A1 | rs11925331 | 11047167      | 28.86         | 0.11                   | 0.038            | C                | 1.73%                  | 0.045                 | 0.00%              | 0.9               | 0.19%          | 0.43          | 0.09%                     | 0.58                     |
| 374 | 3   | SLC6A1 | rs2675163  | 11050014      | 28.87         | 0.23                   | 1.000            | T                | 0.00%                  | 0.94                  | 1.23%              | 0.07              | 0.33%          | 0.3           | 0.00%                     | 0.98                     |
| 375 | 3   | SLC6A1 | rs1062246  | 11055169      | 28.88         | 0.43                   | 0.657            | A                | 0.46%                  | 0.22                  | 0.31%              | 0.4               | 0.01%          | 0.9           | 0.16%                     | 0.45                     |
| 376 | 3   | GRM2   | rs4687770  | 51730105      | 72.81         | 0.22                   | 0.833            | T                | 0.52%                  | 0.23                  | 0.15%              | 0.6               | 0.43%          | 0.26          | 0.06%                     | 0.65                     |
| 377 | 3   | DRD3   | rs2399496  | 115328703     | 135.85        | 0.47                   | 0.042            | T                | 0.12%                  | 0.53                  | 0.05%              | 0.7               | 0.04%          | 0.7           | 0.02%                     | 0.81                     |
| 378 | 3   | DRD3   | rs2134655  | 115340891     | 135.85        | 0.22                   | 0.667            | G                | 0.22%                  | 0.4                   | 0.02%              | 0.8               | 0.01%          | 0.85          | 0.54%                     | 0.16                     |
| 379 | 3   | DRD3   | rs963468   | 115345577     | 135.85        | 0.42                   | 0.235            | G                | 0.02%                  | 0.8                   | 0.00%              | 1                 | 0.00%          | 0.99          | 0.03%                     | 0.73                     |
| 380 | 3   | DRD3   | rs3773678  | 115352768     | 135.85        | 0.18                   | 0.237            | C                | 0.16%                  | 0.48                  | 0.00%              | 1                 | 0.14%          | 0.48          | 0.11%                     | 0.54                     |
| 381 | 3   | DRD3   | rs2630349  | 115356062     | 135.85        | 0.08                   | 0.133            | G                | 0.31%                  | 0.33                  | 0.55%              | 0.2               | 0.01%          | 0.83          | 0.01%                     | 0.88                     |
| 382 | 3   | DRD3   | rs167771   | 115358965     | 135.85        | 0.22                   | 0.092            | T                | 0.16%                  | 0.47                  | 0.14%              | 0.5               | 0.00%          | 0.97          | 0.03%                     | 0.76                     |
| 383 | 3   | DRD3   | rs167770   | 115362252     | 135.85        | 0.31                   | 0.606            | A                | 0.13%                  | 0.52                  | 0.11%              | 0.6               | 0.03%          | 0.76          | 0.32%                     | 0.28                     |
| 384 | 3   | DRD3   | rs1486009  | 115371222     | 135.85        | 0.05                   | 0.406            | A                | 0.19%                  | 0.43                  | 0.25%              | 0.4               | 0.40%          | 0.22          | 0.00%                     | 0.97                     |
| 385 | 3   | DRD3   | rs6280     | 115373505     | 135.85        | 0.36                   | 0.753            | T                | 0.34%                  | 0.31                  | 0.16%              | 0.5               | 0.08%          | 0.6           | 0.29%                     | 0.31                     |
| 386 | 3   | DRD3   | rs9825563  | 115382910     | 135.85        | 0.32                   | 0.869            | A                | 0.02%                  | 0.78                  | 0.26%              | 0.4               | 0.00%          | 0.94          | 0.62%                     | 0.124                    |
| 387 | 3   | GSK3B  | rs4688043  | 121073938     | 141.62        | 0.10                   | 1.000            | T                | 0.01%                  | 0.9                   | 0.08%              | 0.7               | 0.39%          | 0.31          | 0.02%                     | 0.8                      |
| 388 | 3   | GSK3B  | rs1381841  | 121161492     | 141.62        | 0.14                   | 0.758            | A                | 0.08%                  | 0.61                  | 0.64%              | 0.2               | 0.32%          | 0.32          | 1.87%                     | 0.0139                   |
| 389 | 3   | GSK3B  | rs11923854 | 121229259     | 141.63        | 0.15                   | 0.766            | T                | 0.07%                  | 0.64                  | 0.62%              | 0.2               | 0.29%          | 0.35          | 1.84%                     | 0.0145                   |
| 390 | 3   | GSK3B  | rs10934505 | 121250012     | 141.63        | 0.18                   | 0.458            | A                | 0.27%                  | 0.36                  | 0.48%              | 0.3               | 0.54%          | 0.18          | 0.00%                     | 0.99                     |
| 391 | 3   | GSK3B  | rs968824   | 121255730     | 141.63        | 0.25                   | 0.554            | T                | 0.16%                  | 0.49                  | 0.87%              | 0.11              | 0.09%          | 0.59          | 1.20%                     | 0.047                    |
| 392 | 3   | GSK3B  | rs334555   | 121286826     | 141.63        | 0.15                   | 1.000            | C                | 1.01%                  | 0.065                 | 0.27%              | 0.4               | 0.76%          | 0.112         | 0.15%                     | 0.46                     |
| 393 | 3   | GSK3B  | rs3755557  | 121297647     | 141.63        | 0.18                   | 0.797            | T                | 0.01%                  | 0.84                  | 0.01%              | 0.8               | 0.95%          | 0.074         | 0.41%                     | 0.24                     |
| 394 | 4   | GABRB1 | rs4315750  | 46745942      | 70.67         | 0.09                   | 0.700            | C                | 0.03%                  | 0.75                  | 0.21%              | 0.5               | 0.57%          | 0.17          | 0.00%                     | 0.92                     |
| 395 | 4   | GABRB1 | rs4694834  | 46774165      | 70.68         | 0.17                   | 0.609            | G                | 0.00%                  | 0.99                  | 0.03%              | 0.8               | 0.38%          | 0.28          | 1.18%                     | 0.047                    |
| 396 | 4   | GABRB1 | rs6818828  | 46787693      | 70.69         | 0.27                   | 0.476            | T                | 1.10%                  | 0.062                 | 0.03%              | 0.8               | 0.00%          | 0.91          | 0.01%                     | 0.87                     |
| 397 | 4   | GABRB1 | rs6854637  | 46793476      | 70.69         | 0.08                   | 0.609            | G                | 1.17%                  | 0.083                 | 1.01%              | 0.1               | 0.06%          | 0.66          | 0.23%                     | 0.4                      |

|     | Q                     | R                    | S                  | T                 | U              | V             | W              | X             | Y                 | Z                | AA                    | AB                   | AC                         | AD                        | AE                     | AF                    |
|-----|-----------------------|----------------------|--------------------|-------------------|----------------|---------------|----------------|---------------|-------------------|------------------|-----------------------|----------------------|----------------------------|---------------------------|------------------------|-----------------------|
| 1   | H2_Letter-Number Span | P_Letter-Number Span | H2_Verbal learning | P_Verbal learning | H2_Abstraction | P_Abstraction | H2_Face memory | P_Face memory | H2_Spatial memory | P_Spatial memory | H2_Spatial processing | P_Spatial processing | H2_Sensori-motor dexterity | P_Sensori-motor dexterity | H2_Emotion recognition | P_Emotion recognition |
| 365 | 0.33%                 | 0.3                  | 0.01%              | 0.84              | 0.00%          | 0.9           | 0.92%          | 0.08          | 0.31%             | 0.32             | 0.54%                 | 0.21                 | 0.11%                      | 0.5                       | 0.08%                  | 0.6                   |
| 366 | 0.00%                 | 0.9                  | 0.14%              | 0.47              | 0.14%          | 0.5           | 0.01%          | 0.8           | 0.25%             | 0.35             | 0.45%                 | 0.22                 | 0.19%                      | 0.4                       | 0.04%                  | 0.7                   |
| 367 | 0.32%                 | 0.3                  | 0.28%              | 0.35              | 0.00%          | 0.9           | 0.59%          | 0.14          | 0.46%             | 0.25             | 0.02%                 | 0.83                 | 0.46%                      | 0.2                       | 0.07%                  | 0.6                   |
| 368 | 0.06%                 | 0.7                  | 0.59%              | 0.14              | 0.00%          | 0.9           | 0.35%          | 0.3           | 0.21%             | 0.39             | 0.00%                 | 0.96                 | 0.99%                      | 0.06                      | 0.03%                  | 0.8                   |
| 369 | 0.24%                 | 0.4                  | 0.35%              | 0.26              | 0.00%          | 1             | 0.60%          | 0.14          | 1.69%             | 0.017            | 0.43%                 | 0.25                 | 0.39%                      | 0.3                       | 0.06%                  | 0.6                   |
| 370 | 0.06%                 | 0.6                  | 0.00%              | 0.89              | 0.22%          | 0.3           | 0.01%          | 0.8           | 0.61%             | 0.135            | 0.01%                 | 0.86                 | 0.51%                      | 0.2                       | 0.07%                  | 0.6                   |
| 371 | 0.04%                 | 0.7                  | 0.00%              | 0.91              | 0.02%          | 0.8           | 0.24%          | 0.4           | 0.88%             | 0.105            | 0.00%                 | 0.93                 | 0.11%                      | 0.5                       | 0.05%                  | 0.7                   |
| 372 | 0.01%                 | 0.9                  | 0.10%              | 0.56              | 0.01%          | 0.8           | 2.21%          | 0.006         | 0.08%             | 0.61             | 0.37%                 | 0.3                  | 0.25%                      | 0.4                       | 0.14%                  | 0.5                   |
| 373 | 0.05%                 | 0.7                  | 2.13%              | 0.0046            | 0.21%          | 0.4           | 0.24%          | 0.3           | 0.11%             | 0.54             | 0.01%                 | 0.85                 | 0.18%                      | 0.4                       | 0.02%                  | 0.8                   |
| 374 | 0.13%                 | 0.5                  | 0.01%              | 0.85              | 0.02%          | 0.8           | 0.25%          | 0.3           | 0.02%             | 0.82             | 0.87%                 | 0.094                | 0.02%                      | 0.8                       | 0.01%                  | 0.8                   |
| 375 | 0.03%                 | 0.7                  | 0.44%              | 0.19              | 0.59%          | 0.13          | 0.53%          | 0.2           | 0.00%             | 0.97             | 0.00%                 | 1                    | 0.00%                      | 1                         | 0.15%                  | 0.5                   |
| 376 | 0.00%                 | 0.9                  | 0.00%              | 0.94              | 0.10%          | 0.6           | 0.42%          | 0.2           | 0.12%             | 0.55             | 0.04%                 | 0.74                 | 0.71%                      | 0.14                      | 0.14%                  | 0.5                   |
| 377 | 0.74%                 | 0.09                 | 0.47%              | 0.18              | 0.65%          | 0.11          | 1.21%          | 0.03          | 0.97%             | 0.062            | 0.08%                 | 0.62                 | 0.12%                      | 0.5                       | 0.20%                  | 0.4                   |
| 378 | 0.08%                 | 0.6                  | 0.04%              | 0.68              | 0.00%          | 0.9           | 0.30%          | 0.3           | 0.19%             | 0.41             | 0.32%                 | 0.31                 | 0.48%                      | 0.2                       | 0.29%                  | 0.3                   |
| 379 | 0.42%                 | 0.2                  | 0.11%              | 0.53              | 0.46%          | 0.2           | 0.05%          | 0.7           | 0.13%             | 0.51             | 0.00%                 | 0.95                 | 0.72%                      | 0.11                      | 0.00%                  | 0.9                   |
| 380 | 0.17%                 | 0.4                  | 0.12%              | 0.49              | 0.67%          | 0.11          | 0.00%          | 1             | 0.21%             | 0.37             | 0.18%                 | 0.42                 | 0.19%                      | 0.4                       | 0.20%                  | 0.4                   |
| 381 | 0.00%                 | 0.9                  | 0.11%              | 0.49              | 0.01%          | 0.8           | 0.60%          | 0.13          | 0.06%             | 0.62             | 0.07%                 | 0.59                 | 0.10%                      | 0.5                       | 1.90%                  | 0.006                 |
| 382 | 0.14%                 | 0.5                  | 0.00%              | 0.91              | 0.03%          | 0.8           | 0.01%          | 0.8           | 0.00%             | 1                | 0.04%                 | 0.68                 | 0.02%                      | 0.8                       | 0.55%                  | 0.2                   |
| 383 | 0.08%                 | 0.6                  | 0.08%              | 0.57              | 0.06%          | 0.6           | 0.11%          | 0.5           | 0.00%             | 0.92             | 0.18%                 | 0.44                 | 0.01%                      | 0.8                       | 0.41%                  | 0.2                   |
| 384 | 1.30%                 | 0.02                 | 0.05%              | 0.66              | 0.03%          | 0.7           | 0.71%          | 0.07          | 0.10%             | 0.54             | 0.06%                 | 0.66                 | 0.01%                      | 0.9                       | 0.56%                  | 0.2                   |
| 385 | 0.06%                 | 0.6                  | 0.00%              | 0.96              | 0.15%          | 0.4           | 1.31%          | 0.02          | 0.00%             | 0.93             | 0.22%                 | 0.39                 | 0.25%                      | 0.3                       | 1.07%                  | 0.05                  |
| 386 | 0.26%                 | 0.3                  | 0.00%              | 0.93              | 0.00%          | 0.9           | 0.11%          | 0.5           | 0.01%             | 0.88             | 0.44%                 | 0.22                 | 0.12%                      | 0.5                       | 0.66%                  | 0.12                  |
| 387 | 0.00%                 | 0.9                  | 0.12%              | 0.55              | 0.16%          | 0.5           | 0.02%          | 0.8           | 0.00%             | 0.95             | 0.05%                 | 0.72                 | 0.01%                      | 0.9                       | 0.42%                  | 0.3                   |
| 388 | 0.20%                 | 0.4                  | 0.00%              | 0.94              | 0.27%          | 0.3           | 0.85%          | 0.09          | 0.76%             | 0.117            | 1.59%                 | 0.028                | 0.52%                      | 0.2                       | 0.00%                  | 1                     |
| 389 | 0.01%                 | 0.8                  | 0.00%              | 1                 | 0.09%          | 0.6           | 0.46%          | 0.2           | 0.90%             | 0.087            | 1.64%                 | 0.025                | 1.77%                      | 0.012                     | 0.19%                  | 0.4                   |
| 390 | 0.43%                 | 0.2                  | 0.25%              | 0.34              | 0.29%          | 0.3           | 0.81%          | 0.1           | 0.07%             | 0.61             | 0.23%                 | 0.41                 | 0.42%                      | 0.2                       | 0.00%                  | 1                     |
| 391 | 0.26%                 | 0.3                  | 0.05%              | 0.67              | 0.71%          | 0.11          | 0.00%          | 1             | 0.59%             | 0.17             | 1.79%                 | 0.021                | 0.29%                      | 0.3                       | 0.22%                  | 0.4                   |
| 392 | 0.02%                 | 0.8                  | 0.09%              | 0.55              | 0.54%          | 0.2           | 1.08%          | 0.05          | 1.22%             | 0.043            | 0.02%                 | 0.82                 | 0.31%                      | 0.3                       | 0.13%                  | 0.5                   |
| 393 | 0.69%                 | 0.11                 | 0.00%              | 0.96              | 0.10%          | 0.6           | 0.29%          | 0.3           | 0.24%             | 0.36             | 0.58%                 | 0.17                 | 1.31%                      | 0.03                      | 0.14%                  | 0.5                   |
| 394 | 0.03%                 | 0.7                  | 0.19%              | 0.41              | 0.17%          | 0.4           | 0.32%          | 0.3           | 0.10%             | 0.57             | 0.38%                 | 0.28                 | 0.32%                      | 0.3                       | 0.00%                  | 0.9                   |
| 395 | 0.33%                 | 0.3                  | 0.41%              | 0.23              | 0.00%          | 0.9           | 1.76%          | 0.013         | 0.27%             | 0.35             | 0.03%                 | 0.76                 | 0.14%                      | 0.5                       | 0.01%                  | 0.9                   |
| 396 | 0.21%                 | 0.4                  | 1.07%              | 0.042             | 0.11%          | 0.5           | 0.65%          | 0.11          | 0.02%             | 0.77             | 0.05%                 | 0.68                 | 0.02%                      | 0.8                       | 0.27%                  | 0.3                   |
| 397 | 0.11%                 | 0.5                  | 0.04%              | 0.7               | 0.17%          | 0.5           | 0.23%          | 0.4           | 0.14%             | 0.51             | 0.03%                 | 0.75                 | 0.45%                      | 0.2                       | 0.49%                  | 0.2                   |



|     | A   | B      | C          | D             | E             | F                      | G                | H                | I                      | J                     | K                  | L                 | M              | N             | O                         | P                        |
|-----|-----|--------|------------|---------------|---------------|------------------------|------------------|------------------|------------------------|-----------------------|--------------------|-------------------|----------------|---------------|---------------------------|--------------------------|
| 1   | Chr | Gene   | SNP ID     | Position (bp) | Position (cM) | Minor allele frequency | Hardy-Weinberg P | Reference allele | H2_Prepulse inhibition | P_Prepulse inhibition | H2_P50 suppression | P_P50 suppression | H2_Antisaccade | P_Antisaccade | H2_Continuous performance | P_Continuous performance |
| 398 | 4   | GABRB1 | rs1866989  | 46795862      | 70.69         | 0.41                   | 0.370            | A                | 0.00%                  | 0.99                  | 0.04%              | 0.7               | 0.26%          | 0.36          | 0.08%                     | 0.6                      |
| 399 | 4   | GABRB1 | rs1470207  | 46818137      | 70.70         | 0.46                   | 1.000            | A                | 0.12%                  | 0.55                  | 0.22%              | 0.4               | 0.03%          | 0.76          | 0.02%                     | 0.77                     |
| 400 | 4   | GABRB1 | rs1946966  | 46832233      | 70.70         | 0.46                   | 0.884            | C                | 0.13%                  | 0.53                  | 0.33%              | 0.3               | 0.03%          | 0.73          | 0.00%                     | 0.97                     |
| 401 | 4   | GABRB1 | rs6827925  | 46851302      | 70.71         | 0.16                   | 0.579            | A                | 0.64%                  | 0.17                  | 0.19%              | 0.5               | 0.20%          | 0.43          | 0.26%                     | 0.36                     |
| 402 | 4   | GABRB1 | rs1542097  | 46856324      | 70.71         | 0.16                   | 1.000            | A                | 0.61%                  | 0.18                  | 0.22%              | 0.4               | 0.26%          | 0.37          | 0.19%                     | 0.43                     |
| 403 | 4   | GABRB1 | rs3822110  | 46863626      | 70.72         | 0.11                   | 1.000            | T                | 0.12%                  | 0.57                  | 0.74%              | 0.2               | 0.33%          | 0.31          | 0.00%                     | 0.99                     |
| 404 | 4   | GABRB1 | rs2044081  | 46913097      | 70.74         | 0.15                   | 0.772            | C                | 0.05%                  | 0.7                   | 0.56%              | 0.2               | 0.18%          | 0.45          | 0.18%                     | 0.44                     |
| 405 | 4   | GABRB1 | rs1372497  | 46917095      | 70.74         | 0.34                   | 1.000            | T                | 0.53%                  | 0.2                   | 1.00%              | 0.11              | 0.10%          | 0.56          | 0.02%                     | 0.79                     |
| 406 | 4   | GABRB1 | rs7672100  | 46960347      | 70.76         | 0.24                   | 0.445            | A                | 1.03%                  | 0.076                 | 1.06%              | 0.09              | 0.04%          | 0.7           | 0.43%                     | 0.22                     |
| 407 | 4   | GABRB1 | rs2078610  | 46983811      | 70.77         | 0.37                   | 1.000            | T                | 0.25%                  | 0.38                  | 1.04%              | 0.08              | 0.00%          | 0.91          | 0.02%                     | 0.78                     |
| 408 | 4   | GABRB1 | rs4396966  | 46985892      | 70.77         | 0.49                   | 0.666            | C                | 0.74%                  | 0.126                 | 0.36%              | 0.3               | 0.50%          | 0.2           | 1.04%                     | 0.058                    |
| 409 | 4   | GABRB1 | rs9683412  | 46997541      | 70.77         | 0.39                   | 1.000            | A                | 0.85%                  | 0.104                 | 1.36%              | 0.05              | 0.01%          | 0.85          | 0.12%                     | 0.52                     |
| 410 | 4   | GABRB1 | rs13102109 | 46997899      | 70.77         | 0.07                   | 1.000            | A                | 0.56%                  | 0.18                  | 0.50%              | 0.2               | 0.04%          | 0.71          | 0.07%                     | 0.61                     |
| 411 | 4   | GABRB1 | rs4235146  | 46999617      | 70.77         | 0.34                   | 1.000            | T                | 1.40%                  | 0.037                 | 2.20%              | 0.012             | 0.37%          | 0.27          | 0.02%                     | 0.8                      |
| 412 | 4   | GABRB1 | rs4518219  | 46999789      | 70.77         | 0.25                   | 0.852            | T                | 0.94%                  | 0.087                 | 0.69%              | 0.2               | 0.11%          | 0.55          | 0.05%                     | 0.68                     |
| 413 | 4   | GABRB1 | rs4627835  | 47005024      | 70.78         | 0.19                   | 0.634            | A                | 0.71%                  | 0.143                 | 0.03%              | 0.8               | 0.06%          | 0.67          | 0.41%                     | 0.24                     |
| 414 | 4   | GABRB1 | rs10000697 | 47010078      | 70.79         | 0.43                   | 0.245            | A                | 0.73%                  | 0.15                  | 0.74%              | 0.2               | 0.06%          | 0.67          | 0.36%                     | 0.29                     |
| 415 | 4   | GABRB1 | rs4599390  | 47010078      | 70.78         | 0.48                   | 0.559            | T                | 0.77%                  | 0.137                 | 0.59%              | 0.2               | 0.02%          | 0.81          | 0.49%                     | 0.22                     |
| 416 | 4   | GABRB1 | rs728292   | 47030500      | 70.79         | 0.47                   | 0.663            | C                | 0.01%                  | 0.84                  | 0.13%              | 0.6               | 0.12%          | 0.52          | 0.11%                     | 0.53                     |
| 417 | 4   | GABRB1 | rs6830892  | 47052237      | 70.80         | 0.45                   | 0.665            | C                | 0.03%                  | 0.78                  | 0.05%              | 0.7               | 0.49%          | 0.2           | 0.22%                     | 0.38                     |
| 418 | 4   | GABRB1 | rs4694846  | 47060562      | 70.80         | 0.44                   | 0.659            | T                | 0.06%                  | 0.69                  | 0.62%              | 0.2               | 0.61%          | 0.18          | 0.14%                     | 0.5                      |
| 419 | 4   | GABRB1 | rs13107066 | 47063555      | 70.80         | 0.43                   | 0.375            | T                | 0.25%                  | 0.37                  | 0.01%              | 0.9               | 0.01%          | 0.83          | 0.33%                     | 0.28                     |
| 420 | 4   | GABRB1 | rs4695226  | 47077677      | 70.80         | 0.48                   | 0.059            | C                | 0.02%                  | 0.82                  | 0.12%              | 0.6               | 0.07%          | 0.64          | 0.05%                     | 0.67                     |
| 421 | 4   | GABRB1 | rs7439087  | 47091757      | 70.81         | 0.35                   | 0.035            | T                | 0.00%                  | 0.98                  | 0.97%              | 0.11              | 0.12%          | 0.52          | 0.09%                     | 0.57                     |
| 422 | 4   | GABRB1 | rs7679148  | 47111576      | 70.82         | 0.23                   | 0.065            | G                | 0.96%                  | 0.083                 | 1.55%              | 0.04              | 0.10%          | 0.56          | 0.80%                     | 0.096                    |
| 423 | 4   | GRID2  | rs1513467  | 93464181      | 106.47        | 0.09                   | 1.000            | A                | 0.66%                  | 0.134                 | 0.03%              | 0.8               | 0.15%          | 0.47          | 0.24%                     | 0.35                     |
| 424 | 4   | GRID2  | rs13115966 | 93503757      | 106.47        | 0.01                   | 1.000            | C                | 0.06%                  | 0.62                  | 0.20%              | 0.4               | 0.86%          | 0.079         | 0.05%                     | 0.65                     |
| 425 | 4   | GRID2  | rs6821502  | 93511369      | 106.47        | 0.28                   | 0.717            | C                | 0.56%                  | 0.19                  | 0.12%              | 0.6               | 0.05%          | 0.69          | 0.24%                     | 0.37                     |
| 426 | 4   | GRID2  | rs2089990  | 93519211      | 106.47        | 0.23                   | 0.109            | T                | 0.35%                  | 0.29                  | 0.10%              | 0.6               | 0.06%          | 0.63          | 0.13%                     | 0.49                     |
| 427 | 4   | GRID2  | rs1513460  | 93528549      | 106.47        | 0.32                   | 0.240            | A                | 0.89%                  | 0.099                 | 0.00%              | 1                 | 0.07%          | 0.64          | 0.44%                     | 0.22                     |
| 428 | 4   | GRID2  | rs13109229 | 93551627      | 106.47        | 0.25                   | 0.020            | T                | 0.04%                  | 0.71                  | 1.19%              | 0.09              | 0.00%          | 0.94          | 0.04%                     | 0.7                      |
| 429 | 4   | GRID2  | rs5021051  | 93565766      | 106.47        | 0.19                   | 0.335            | C                | 0.51%                  | 0.24                  | 0.00%              | 0.9               | 1.02%          | 0.083         | 0.02%                     | 0.79                     |
| 430 | 4   | GRID2  | rs6844474  | 93573071      | 106.47        | 0.12                   | 0.486            | G                | 1.87%                  | 0.0123                | 0.18%              | 0.5               | 0.00%          | 0.94          | 0.55%                     | 0.14                     |

|     | Q                     | R                    | S                  | T                 | U              | V             | W              | X             | Y                 | Z                | AA                    | AB                   | AC                         | AD                        | AE                     | AF                    |
|-----|-----------------------|----------------------|--------------------|-------------------|----------------|---------------|----------------|---------------|-------------------|------------------|-----------------------|----------------------|----------------------------|---------------------------|------------------------|-----------------------|
| 1   | H2_Letter-Number Span | P_Letter-Number Span | H2_Verbal learning | P_Verbal learning | H2_Abstraction | P_Abstraction | H2_Face memory | P_Face memory | H2_Spatial memory | P_Spatial memory | H2_Spatial processing | P_Spatial processing | H2_Sensori-motor dexterity | P_Sensori-motor dexterity | H2_Emotion recognition | P_Emotion recognition |
| 398 | 0.11%                 | 0.5                  | 0.02%              | 0.8               | 0.15%          | 0.5           | 0.19%          | 0.4           | 0.02%             | 0.79             | 0.00%                 | 0.95                 | 0.32%                      | 0.3                       | 0.00%                  | 1                     |
| 399 | 0.42%                 | 0.2                  | 0.75%              | 0.09              | 0.05%          | 0.7           | 0.09%          | 0.6           | 0.00%             | 0.97             | 0.48%                 | 0.22                 | 0.23%                      | 0.4                       | 0.00%                  | 1                     |
| 400 | 0.54%                 | 0.15                 | 0.91%              | 0.059             | 0.01%          | 0.9           | 0.06%          | 0.6           | 0.01%             | 0.85             | 0.25%                 | 0.37                 | 0.33%                      | 0.3                       | 0.00%                  | 1                     |
| 401 | 0.02%                 | 0.8                  | 0.02%              | 0.8               | 0.50%          | 0.2           | 1.68%          | 0.02          | 0.00%             | 0.95             | 0.07%                 | 0.66                 | 0.06%                      | 0.7                       | 0.01%                  | 0.8                   |
| 402 | 0.05%                 | 0.7                  | 0.09%              | 0.58              | 0.32%          | 0.3           | 1.61%          | 0.02          | 0.00%             | 0.99             | 0.07%                 | 0.66                 | 0.06%                      | 0.7                       | 0.01%                  | 0.8                   |
| 403 | 0.00%                 | 0.9                  | 0.04%              | 0.71              | 0.03%          | 0.7           | 0.13%          | 0.5           | 0.36%             | 0.28             | 0.03%                 | 0.75                 | 0.24%                      | 0.4                       | 0.80%                  | 0.1                   |
| 404 | 0.03%                 | 0.7                  | 1.13%              | 0.05              | 0.09%          | 0.6           | 0.29%          | 0.3           | 0.10%             | 0.57             | 0.20%                 | 0.43                 | 0.00%                      | 0.9                       | 0.09%                  | 0.6                   |
| 405 | 0.16%                 | 0.4                  | 1.10%              | 0.044             | 0.03%          | 0.7           | 0.06%          | 0.6           | 0.69%             | 0.13             | 0.20%                 | 0.43                 | 0.02%                      | 0.8                       | 0.25%                  | 0.4                   |
| 406 | 0.41%                 | 0.2                  | 0.44%              | 0.2               | 0.26%          | 0.3           | 1.33%          | 0.03          | 0.06%             | 0.64             | 0.04%                 | 0.71                 | 0.01%                      | 0.9                       | 0.30%                  | 0.3                   |
| 407 | 0.13%                 | 0.5                  | 0.19%              | 0.4               | 0.60%          | 0.13          | 1.52%          | 0.02          | 0.03%             | 0.75             | 0.31%                 | 0.3                  | 0.02%                      | 0.8                       | 0.52%                  | 0.2                   |
| 408 | 0.03%                 | 0.8                  | 0.12%              | 0.5               | 0.44%          | 0.2           | 0.26%          | 0.3           | 0.08%             | 0.6              | 0.02%                 | 0.82                 | 0.00%                      | 0.9                       | 0.04%                  | 0.7                   |
| 409 | 0.26%                 | 0.3                  | 0.18%              | 0.41              | 0.20%          | 0.4           | 0.53%          | 0.14          | 0.04%             | 0.72             | 0.52%                 | 0.19                 | 0.07%                      | 0.6                       | 0.28%                  | 0.3                   |
| 410 | 0.02%                 | 0.8                  | 0.11%              | 0.52              | 0.52%          | 0.2           | 0.61%          | 0.13          | 0.04%             | 0.68             | 0.17%                 | 0.43                 | 0.03%                      | 0.7                       | 0.06%                  | 0.6                   |
| 411 | 0.34%                 | 0.3                  | 0.37%              | 0.24              | 1.11%          | 0.04          | 1.65%          | 0.012         | 0.00%             | 0.91             | 1.36%                 | 0.034                | 0.07%                      | 0.6                       | 0.42%                  | 0.2                   |
| 412 | 1.22%                 | 0.03                 | 0.39%              | 0.23              | 0.64%          | 0.12          | 1.46%          | 0.02          | 0.00%             | 0.89             | 0.81%                 | 0.104                | 0.06%                      | 0.6                       | 0.44%                  | 0.2                   |
| 413 | 0.06%                 | 0.6                  | 0.02%              | 0.77              | 0.07%          | 0.6           | 0.32%          | 0.3           | 0.00%             | 0.91             | 0.24%                 | 0.42                 | 0.11%                      | 0.6                       | 0.05%                  | 0.7                   |
| 414 | 0.74%                 | 0.12                 | 0.33%              | 0.29              | 0.64%          | 0.15          | 0.43%          | 0.2           | 0.04%             | 0.73             | 0.51%                 | 0.23                 | 0.33%                      | 0.3                       | 0.09%                  | 0.6                   |
| 415 | 0.67%                 | 0.13                 | 0.22%              | 0.39              | 0.43%          | 0.2           | 0.61%          | 0.2           | 0.03%             | 0.75             | 0.33%                 | 0.33                 | 0.08%                      | 0.6                       | 0.26%                  | 0.4                   |
| 416 | 0.04%                 | 0.7                  | 0.06%              | 0.65              | 0.13%          | 0.5           | 0.00%          | 0.9           | 0.01%             | 0.85             | 0.25%                 | 0.37                 | 0.60%                      | 0.15                      | 0.02%                  | 0.8                   |
| 417 | 0.06%                 | 0.6                  | 0.02%              | 0.79              | 0.34%          | 0.3           | 0.00%          | 1             | 0.07%             | 0.63             | 0.36%                 | 0.28                 | 0.23%                      | 0.4                       | 0.07%                  | 0.6                   |
| 418 | 0.13%                 | 0.5                  | 0.21%              | 0.41              | 0.21%          | 0.4           | 0.30%          | 0.3           | 0.02%             | 0.81             | 0.14%                 | 0.51                 | 0.00%                      | 1                         | 0.09%                  | 0.6                   |
| 419 | 0.03%                 | 0.7                  | 0.03%              | 0.73              | 0.40%          | 0.2           | 0.21%          | 0.4           | 0.01%             | 0.85             | 0.12%                 | 0.53                 | 0.43%                      | 0.2                       | 0.11%                  | 0.5                   |
| 420 | 0.08%                 | 0.6                  | 0.06%              | 0.63              | 0.00%          | 0.9           | 0.50%          | 0.2           | 0.09%             | 0.56             | 0.12%                 | 0.53                 | 0.81%                      | 0.09                      | 0.44%                  | 0.2                   |
| 421 | 0.02%                 | 0.8                  | 0.28%              | 0.31              | 0.11%          | 0.5           | 0.07%          | 0.6           | 0.04%             | 0.69             | 0.27%                 | 0.35                 | 0.11%                      | 0.5                       | 0.07%                  | 0.6                   |
| 422 | 0.08%                 | 0.6                  | 0.00%              | 0.99              | 0.03%          | 0.7           | 0.22%          | 0.4           | 0.26%             | 0.35             | 0.44%                 | 0.24                 | 1.41%                      | 0.03                      | 0.51%                  | 0.2                   |
| 423 | 0.24%                 | 0.3                  | 0.04%              | 0.69              | 0.15%          | 0.5           | 0.00%          | 1             | 0.00%             | 1                | 0.00%                 | 0.94                 | 0.08%                      | 0.6                       | 0.00%                  | 1                     |
| 424 | 0.16%                 | 0.4                  | 0.33%              | 0.27              | 0.04%          | 0.7           | 0.07%          | 0.6           | 0.20%             | 0.42             | 1.12%                 | 0.094                | 0.16%                      | 0.5                       | 0.01%                  | 0.8                   |
| 425 | 0.87%                 | 0.07                 | 0.26%              | 0.33              | 0.02%          | 0.8           | 0.33%          | 0.3           | 0.15%             | 0.47             | 0.03%                 | 0.75                 | 0.07%                      | 0.6                       | 0.01%                  | 0.9                   |
| 426 | 0.00%                 | 1                    | 0.45%              | 0.18              | 0.09%          | 0.6           | 0.18%          | 0.4           | 0.30%             | 0.29             | 0.00%                 | 0.96                 | 1.74%                      | 0.02                      | 0.45%                  | 0.3                   |
| 427 | 0.06%                 | 0.6                  | 0.57%              | 0.143             | 0.13%          | 0.5           | 0.01%          | 0.9           | 0.37%             | 0.25             | 0.01%                 | 0.83                 | 0.12%                      | 0.5                       | 0.00%                  | 1                     |
| 428 | 0.03%                 | 0.8                  | 0.34%              | 0.25              | 0.06%          | 0.7           | 0.28%          | 0.4           | 0.05%             | 0.67             | 0.97%                 | 0.079                | 0.39%                      | 0.3                       | 0.46%                  | 0.2                   |
| 429 | 0.00%                 | 0.9                  | 0.44%              | 0.23              | 0.21%          | 0.4           | 0.00%          | 0.9           | 0.37%             | 0.29             | 0.19%                 | 0.46                 | 1.11%                      | 0.05                      | 0.08%                  | 0.6                   |
| 430 | 0.18%                 | 0.3                  | 0.04%              | 0.7               | 0.60%          | 0.2           | 0.03%          | 0.7           | 0.22%             | 0.38             | 0.70%                 | 0.127                | 0.64%                      | 0.14                      | 0.00%                  | 0.9                   |

|     | A   | B     | C          | D             | E             | F                      | G                | H                | I                      | J                     | K                  | L                 | M              | N             | O                         | P                        |
|-----|-----|-------|------------|---------------|---------------|------------------------|------------------|------------------|------------------------|-----------------------|--------------------|-------------------|----------------|---------------|---------------------------|--------------------------|
| 1   | Chr | Gene  | SNP ID     | Position (bp) | Position (cM) | Minor allele frequency | Hardy-Weinberg P | Reference allele | H2_Prepulse inhibition | P_Prepulse inhibition | H2_P50 suppression | P_P50 suppression | H2_Antisaccade | P_Antisaccade | H2_Continuous performance | P_Continuous performance |
| 431 | 4   | GRID2 | rs12647297 | 93621516      | 106.47        | 0.21                   | 0.664            | C                | 0.13%                  | 0.53                  | 0.00%              | 1                 | 0.03%          | 0.75          | 0.04%                     | 0.72                     |
| 432 | 4   | GRID2 | rs6811045  | 93622702      | 106.47        | 0.01                   | 1.000            | G                | 0.15%                  | 0.56                  | 0.03%              | 0.8               | 0.62%          | 0.089         | 0.12%                     | 0.51                     |
| 433 | 4   | GRID2 | rs6532372  | 93628760      |               | 0.00                   | 1.000            |                  |                        |                       |                    |                   |                |               |                           |                          |
| 434 | 4   | GRID2 | rs7659338  | 93647438      | 106.47        | 0.27                   | 0.468            | T                | 0.00%                  | 0.94                  | 0.40%              | 0.3               | 0.01%          | 0.89          | 0.01%                     | 0.87                     |
| 435 | 4   | GRID2 | rs13435785 | 93658446      | 106.47        | 0.01                   | 1.000            | A                | 0.07%                  | 0.61                  | 0.00%              | 0.9               | 0.15%          | 0.44          | 0.22%                     | 0.42                     |
| 436 | 4   | GRID2 | rs4692973  | 93669372      | 106.47        | 0.25                   | 0.848            | T                | 1.58%                  | 0.031                 | 0.01%              | 0.9               | 0.23%          | 0.4           | 1.59%                     | 0.022                    |
| 437 | 4   | GRID2 | rs6815704  | 93693589      | 106.47        | 0.17                   | 1.000            | G                | 1.48%                  | 0.038                 | 0.02%              | 0.8               | 0.26%          | 0.37          | 0.31%                     | 0.3                      |
| 438 | 4   | GRID2 | rs1450500  | 93698298      | 106.47        | 0.38                   | 0.648            | G                | 0.43%                  | 0.27                  | 0.02%              | 0.8               | 0.01%          | 0.87          | 0.21%                     | 0.4                      |
| 439 | 4   | GRID2 | rs921354   | 93703741      | 106.47        | 0.38                   | 0.757            | T                | 1.44%                  | 0.034                 | 0.27%              | 0.4               | 0.21%          | 0.4           | 0.57%                     | 0.15                     |
| 440 | 4   | GRID2 | rs11934085 | 93734189      | 106.52        | 0.06                   | 0.513            | C                | 0.67%                  | 0.18                  | 0.08%              | 0.6               | 0.09%          | 0.61          | 0.04%                     | 0.72                     |
| 441 | 4   | GRID2 | rs7693534  | 93758663      | 106.60        | 0.32                   | 0.239            | T                | 0.61%                  | 0.16                  | 0.07%              | 0.6               | 0.03%          | 0.73          | 0.55%                     | 0.16                     |
| 442 | 4   | GRID2 | rs11734654 | 93788183      | 106.69        | 0.05                   | 0.379            | C                | 0.03%                  | 0.74                  | 0.00%              | 1                 | 0.02%          | 0.81          | 0.22%                     | 0.35                     |
| 443 | 4   | GRID2 | rs1479332  | 93809842      | 106.76        | 0.04                   | 1.000            | A                | 0.99%                  | 0.094                 | 0.15%              | 0.5               | 0.10%          | 0.57          | 0.03%                     | 0.78                     |
| 444 | 4   | GRID2 | rs7692227  | 93828960      | 106.82        | 0.24                   | 0.561            | T                | 0.02%                  | 0.81                  | 0.01%              | 0.9               | 0.00%          | 0.91          | 0.33%                     | 0.29                     |
| 445 | 4   | GRID2 | rs10516911 | 93838020      | 106.83        | 0.08                   | 0.317            | A                | 0.00%                  | 0.92                  | 0.21%              | 0.4               | 0.02%          | 0.81          | 0.00%                     | 0.93                     |
| 446 | 4   | GRID2 | rs2870642  | 93850739      | 106.84        | 0.13                   | 0.539            | A                | 0.03%                  | 0.79                  | 0.00%              | 1                 | 0.02%          | 0.79          | 0.10%                     | 0.59                     |
| 447 | 4   | GRID2 | rs1434786  | 93859480      | 106.84        | 0.08                   | 0.604            | G                | 0.01%                  | 0.86                  | 0.04%              | 0.8               | 0.04%          | 0.72          | 0.07%                     | 0.64                     |
| 448 | 4   | GRID2 | rs6532381  | 93872361      | 106.84        | 0.27                   | 0.458            | T                | 0.00%                  | 1                     | 0.15%              | 0.5               | 0.00%          | 0.93          | 0.28%                     | 0.34                     |
| 449 | 4   | GRID2 | rs10516914 | 93879690      | 106.85        | 0.34                   | 0.142            | G                | 0.01%                  | 0.84                  | 0.23%              | 0.5               | 0.29%          | 0.35          | 0.18%                     | 0.45                     |
| 450 | 4   | GRID2 | rs10516916 | 93879981      | 106.85        | 0.07                   | 1.000            | C                | 0.00%                  | 0.92                  | 0.10%              | 0.6               | 0.31%          | 0.31          | 0.07%                     | 0.63                     |
| 451 | 4   | GRID2 | rs11931529 | 93918392      | 106.86        | 0.07                   | 1.000            | T                | 0.16%                  | 0.5                   | 1.05%              | 0.1               | 0.67%          | 0.15          | 0.12%                     | 0.53                     |
| 452 | 4   | GRID2 | rs7671095  | 93926311      | 106.86        | 0.20                   | 0.648            | T                | 0.14%                  | 0.53                  | 0.02%              | 0.8               | 0.16%          | 0.48          | 0.24%                     | 0.37                     |
| 453 | 4   | GRID2 | rs1369169  | 93959432      | 106.87        | 0.47                   | 0.311            | G                | 0.10%                  | 0.59                  | 0.32%              | 0.4               | 0.40%          | 0.27          | 0.00%                     | 1                        |
| 454 | 4   | GRID2 | rs4235037  | 93973122      | 106.88        | 0.03                   | 1.000            | T                | 0.00%                  | 0.91                  | 0.07%              | 0.7               | 0.42%          | 0.25          | 0.25%                     | 0.34                     |
| 455 | 4   | GRID2 | rs13147599 | 94003309      | 106.89        | 0.04                   | 0.249            | A                | 0.43%                  | 0.27                  | 0.39%              | 0.4               | 0.14%          | 0.54          | 0.86%                     | 0.103                    |
| 456 | 4   | GRID2 | rs6818303  | 94041073      | 106.90        | 0.09                   | 0.624            | G                | 1.48%                  | 0.039                 | 0.36%              | 0.3               | 0.13%          | 0.52          | 0.00%                     | 0.92                     |
| 457 | 4   | GRID2 | rs1902436  | 94098316      | 106.92        | 0.05                   | 1.000            | T                | 0.13%                  | 0.61                  | 0.19%              | 0.5               | 0.17%          | 0.51          | 0.28%                     | 0.34                     |
| 458 | 4   | GRID2 | rs1378914  | 94117470      | 106.93        | 0.02                   | 1.000            | C                | 0.03%                  | 0.75                  | 0.84%              | 0.2               | 0.50%          | 0.21          | 1.33%                     | 0.037                    |
| 459 | 4   | GRID2 | rs729545   | 94120351      | 106.93        | 0.01                   | 1.000            | C                | 0.02%                  | 0.84                  | 0.31%              | 0.5               | 0.04%          | 0.74          | 0.42%                     | 0.3                      |
| 460 | 4   | GRID2 | rs12498874 | 94128750      | 106.93        | 0.09                   | 0.370            | T                | 0.06%                  | 0.69                  | 0.60%              | 0.3               | 0.25%          | 0.41          | 0.04%                     | 0.74                     |
| 461 | 4   | GRID2 | rs13142489 | 94135377      | 106.94        | 0.06                   | 1.000            | G                | 0.80%                  | 0.132                 | 1.49%              | 0.06              | 0.14%          | 0.52          | 0.08%                     | 0.63                     |
| 462 | 4   | GRID2 | rs1039938  | 94137366      | 106.94        | 0.36                   | 0.639            | C                | 0.00%                  | 0.95                  | 2.57%              | 0.013             | 0.08%          | 0.61          | 0.11%                     | 0.54                     |
| 463 | 4   | GRID2 | rs11945434 | 94159989      | 106.95        | 0.07                   | 1.000            | G                | 0.07%                  | 0.65                  | 0.03%              | 0.8               | 0.24%          | 0.38          | 0.13%                     | 0.5                      |

|     | Q                     | R                    | S                  | T                 | U              | V             | W              | X             | Y                 | Z                | AA                    | AB                   | AC                         | AD                        | AE                     | AF                    |
|-----|-----------------------|----------------------|--------------------|-------------------|----------------|---------------|----------------|---------------|-------------------|------------------|-----------------------|----------------------|----------------------------|---------------------------|------------------------|-----------------------|
| 1   | H2_Letter-Number Span | P_Letter-Number Span | H2_Verbal learning | P_Verbal learning | H2_Abstraction | P_Abstraction | H2_Face memory | P_Face memory | H2_Spatial memory | P_Spatial memory | H2_Spatial processing | P_Spatial processing | H2_Sensori-motor dexterity | P_Sensori-motor dexterity | H2_Emotion recognition | P_Emotion recognition |
| 431 | 0.00%                 | 1                    | 0.18%              | 0.41              | 0.28%          | 0.3           | 0.02%          | 0.8           | 0.26%             | 0.35             | 0.05%                 | 0.69                 | 0.00%                      | 1                         | 2.76%                  | 0.009                 |
| 432 | 0.09%                 | 0.6                  | 0.24%              | 0.32              | 0.01%          | 0.8           | 0.10%          | 0.5           | 0.06%             | 0.6              | 1.74%                 | 0.0064               | 0.57%                      | 0.14                      | 0.04%                  | 0.7                   |
| 433 |                       |                      |                    |                   |                |               |                |               |                   |                  |                       |                      |                            |                           |                        |                       |
| 434 | 0.11%                 | 0.6                  | 0.14%              | 0.47              | 0.28%          | 0.3           | 0.09%          | 0.6           | 0.28%             | 0.32             | 0.02%                 | 0.8                  | 0.06%                      | 0.6                       | 0.40%                  | 0.2                   |
| 435 | 0.63%                 | 0.12                 | 0.00%              | 0.97              | 0.01%          | 0.9           | 0.11%          | 0.5           | 0.01%             | 0.89             | 0.41%                 | 0.39                 | 0.61%                      | 0.2                       | 0.02%                  | 0.8                   |
| 436 | 1.70%                 | 0.009                | 0.19%              | 0.41              | 0.22%          | 0.4           | 0.01%          | 0.8           | 0.70%             | 0.132            | 0.62%                 | 0.17                 | 0.27%                      | 0.3                       | 0.06%                  | 0.7                   |
| 437 | 0.82%                 | 0.08                 | 0.01%              | 0.86              | 0.00%          | 0.9           | 0.07%          | 0.6           | 0.05%             | 0.68             | 0.00%                 | 0.92                 | 0.02%                      | 0.7                       | 0.40%                  | 0.2                   |
| 438 | 0.29%                 | 0.3                  | 0.15%              | 0.47              | 0.14%          | 0.5           | 0.01%          | 0.9           | 0.17%             | 0.46             | 0.86%                 | 0.104                | 0.54%                      | 0.2                       | 0.01%                  | 0.8                   |
| 439 | 0.99%                 | 0.05                 | 0.55%              | 0.148             | 0.01%          | 0.9           | 0.02%          | 0.8           | 0.26%             | 0.34             | 0.36%                 | 0.29                 | 0.01%                      | 0.8                       | 0.05%                  | 0.7                   |
| 440 | 0.00%                 | 1                    | 0.17%              | 0.43              | 0.04%          | 0.7           | 0.09%          | 0.6           | 0.30%             | 0.33             | 0.01%                 | 0.89                 | 0.23%                      | 0.4                       | 0.02%                  | 0.8                   |
| 441 | 0.38%                 | 0.2                  | 0.35%              | 0.24              | 0.16%          | 0.4           | 0.02%          | 0.8           | 0.05%             | 0.66             | 0.15%                 | 0.48                 | 1.51%                      | 0.02                      | 0.04%                  | 0.7                   |
| 442 | 0.01%                 | 0.8                  | 0.57%              | 0.114             | 0.04%          | 0.7           | 0.00%          | 1             | 0.01%             | 0.84             | 0.14%                 | 0.52                 | 0.51%                      | 0.2                       | 0.35%                  | 0.3                   |
| 443 | 0.16%                 | 0.4                  | 0.08%              | 0.6               | 0.00%          | 1             | 0.02%          | 0.8           | 0.02%             | 0.82             | 0.00%                 | 0.91                 | 0.15%                      | 0.5                       | 0.35%                  | 0.3                   |
| 444 | 0.05%                 | 0.7                  | 0.42%              | 0.21              | 0.01%          | 0.8           | 0.05%          | 0.7           | 0.00%             | 0.9              | 0.22%                 | 0.41                 | 0.18%                      | 0.4                       | 0.18%                  | 0.4                   |
| 445 | 0.27%                 | 0.3                  | 0.24%              | 0.34              | 0.10%          | 0.6           | 0.08%          | 0.6           | 0.14%             | 0.51             | 0.01%                 | 0.9                  | 0.29%                      | 0.3                       | 0.25%                  | 0.4                   |
| 446 | 0.01%                 | 0.9                  | 0.39%              | 0.25              | 0.01%          | 0.9           | 0.10%          | 0.6           | 0.01%             | 0.83             | 0.01%                 | 0.85                 | 0.48%                      | 0.2                       | 0.01%                  | 0.9                   |
| 447 | 0.01%                 | 0.9                  | 0.35%              | 0.28              | 0.09%          | 0.6           | 0.01%          | 0.8           | 0.03%             | 0.77             | 0.00%                 | 0.95                 | 0.46%                      | 0.2                       | 0.02%                  | 0.8                   |
| 448 | 0.01%                 | 0.9                  | 0.06%              | 0.64              | 0.03%          | 0.8           | 0.06%          | 0.7           | 0.03%             | 0.78             | 0.31%                 | 0.34                 | 0.37%                      | 0.3                       | 0.00%                  | 0.9                   |
| 449 | 0.07%                 | 0.6                  | 0.07%              | 0.62              | 0.00%          | 0.9           | 0.36%          | 0.3           | 0.07%             | 0.63             | 0.34%                 | 0.32                 | 0.20%                      | 0.4                       | 0.05%                  | 0.7                   |
| 450 | 0.03%                 | 0.7                  | 0.00%              | 0.97              | 0.06%          | 0.6           | 0.18%          | 0.4           | 0.13%             | 0.5              | 0.23%                 | 0.41                 | 1.31%                      | 0.03                      | 0.00%                  | 0.9                   |
| 451 | 1.32%                 | 0.04                 | 0.09%              | 0.59              | 0.27%          | 0.3           | 0.78%          | 0.11          | 1.65%             | 0.025            | 0.01%                 | 0.84                 | 0.39%                      | 0.3                       | 0.03%                  | 0.8                   |
| 452 | 0.19%                 | 0.4                  | 0.21%              | 0.38              | 0.00%          | 0.9           | 0.10%          | 0.6           | 0.00%             | 1                | 0.04%                 | 0.72                 | 0.63%                      | 0.14                      | 0.03%                  | 0.8                   |
| 453 | 0.03%                 | 0.7                  | 0.01%              | 0.87              | 0.00%          | 1             | 0.06%          | 0.7           | 0.36%             | 0.29             | 0.32%                 | 0.34                 | 0.72%                      | 0.13                      | 0.01%                  | 0.9                   |
| 454 | 0.26%                 | 0.3                  | 0.45%              | 0.18              | 0.18%          | 0.4           | 0.33%          | 0.3           | 0.01%             | 0.87             | 0.00%                 | 0.97                 | 0.00%                      | 1                         | 0.05%                  | 0.7                   |
| 455 | 0.27%                 | 0.3                  | 0.02%              | 0.77              | 0.33%          | 0.3           | 0.29%          | 0.3           | 0.37%             | 0.28             | 0.03%                 | 0.79                 | 0.00%                      | 1                         | 0.40%                  | 0.3                   |
| 456 | 0.13%                 | 0.5                  | 0.72%              | 0.114             | 0.21%          | 0.4           | 0.45%          | 0.2           | 1.31%             | 0.053            | 1.01%                 | 0.093                | 0.00%                      | 1                         | 0.00%                  | 1                     |
| 457 | 0.42%                 | 0.3                  | 0.64%              | 0.16              | 0.33%          | 0.3           | 0.08%          | 0.6           | 0.68%             | 0.19             | 0.00%                 | 0.97                 | 0.16%                      | 0.5                       | 0.16%                  | 0.5                   |
| 458 | 0.36%                 | 0.3                  | 0.30%              | 0.31              | 0.49%          | 0.2           | 0.68%          | 0.14          | 0.09%             | 0.59             | 0.07%                 | 0.66                 | 0.06%                      | 0.7                       | 0.31%                  | 0.3                   |
| 459 | 0.04%                 | 0.7                  | 0.01%              | 0.9               | 0.10%          | 0.6           | 0.98%          | 0.12          | 0.01%             | 0.86             | 0.27%                 | 0.43                 | 0.00%                      | 1                         | 0.00%                  | 1                     |
| 460 | 0.00%                 | 1                    | 0.42%              | 0.26              | 0.04%          | 0.7           | 0.02%          | 0.8           | 0.01%             | 0.89             | 0.57%                 | 0.24                 | 0.31%                      | 0.3                       | 0.12%                  | 0.6                   |
| 461 | 0.98%                 | 0.06                 | 0.24%              | 0.38              | 0.06%          | 0.7           | 0.02%          | 0.8           | 0.14%             | 0.52             | 0.05%                 | 0.71                 | 0.05%                      | 0.7                       | 0.07%                  | 0.6                   |
| 462 | 0.21%                 | 0.4                  | 0.40%              | 0.24              | 0.24%          | 0.4           | 0.59%          | 0.2           | 0.72%             | 0.135            | 1.31%                 | 0.051                | 0.21%                      | 0.4                       | 0.04%                  | 0.7                   |
| 463 | 0.01%                 | 0.9                  | 0.70%              | 0.115             | 0.03%          | 0.8           | 0.32%          | 0.3           | 0.59%             | 0.17             | 0.74%                 | 0.128                | 0.00%                      | 0.9                       | 0.02%                  | 0.8                   |

|     | A   | B     | C          | D             | E             | F                      | G                | H                | I                      | J                     | K                  | L                 | M              | N             | O                         | P                        |
|-----|-----|-------|------------|---------------|---------------|------------------------|------------------|------------------|------------------------|-----------------------|--------------------|-------------------|----------------|---------------|---------------------------|--------------------------|
| 1   | Chr | Gene  | SNP ID     | Position (bp) | Position (cM) | Minor allele frequency | Hardy-Weinberg P | Reference allele | H2_Prepulse inhibition | P_Prepulse inhibition | H2_P50 suppression | P_P50 suppression | H2_Antisaccade | P_Antisaccade | H2_Continuous performance | P_Continuous performance |
| 464 | 4   | GRID2 | rs1912718  | 94208915      | 106.96        | 0.38                   | 0.439            | A                | 1.13%                  | 0.077                 | 3.00%              | 0.008             | 0.60%          | 0.18          | 0.84%                     | 0.103                    |
| 465 | 4   | GRID2 | rs12506519 | 94233179      | 106.97        | 0.35                   | 0.340            | A                | 0.12%                  | 0.55                  | 1.29%              | 0.09              | 0.15%          | 0.5           | 0.07%                     | 0.65                     |
| 466 | 4   | GRID2 | rs10021148 | 94257587      | 106.98        | 0.40                   | 0.880            | C                | 0.77%                  | 0.13                  | 0.95%              | 0.13              | 0.06%          | 0.68          | 0.87%                     | 0.089                    |
| 467 | 4   | GRID2 | rs1354296  | 94294286      | 106.99        | 0.43                   | 0.768            | G                | 0.36%                  | 0.3                   | 0.68%              | 0.2               | 0.00%          | 0.94          | 0.09%                     | 0.59                     |
| 468 | 4   | GRID2 | rs1155646  | 94339397      | 107.01        | 0.44                   | 0.142            | C                | 0.20%                  | 0.42                  | 2.98%              | 0.004             | 0.16%          | 0.45          | 0.84%                     | 0.08                     |
| 469 | 4   | GRID2 | rs1875705  | 94361522      | 107.02        | 0.49                   | 0.110            | C                | 0.38%                  | 0.31                  | 3.52%              | 0.003             | 0.06%          | 0.66          | 0.20%                     | 0.42                     |
| 470 | 4   | GRID2 | rs7697616  | 94375370      | 107.02        | 0.13                   | 0.752            | A                | 0.00%                  | 0.95                  | 0.79%              | 0.13              | 0.19%          | 0.42          | 0.01%                     | 0.89                     |
| 471 | 4   | GRID2 | rs10516413 | 94425654      | 107.04        | 0.37                   | 0.218            | T                | 0.13%                  | 0.53                  | 0.82%              | 0.14              | 0.12%          | 0.51          | 0.05%                     | 0.68                     |
| 472 | 4   | GRID2 | rs4524351  | 94435453      | 107.04        | 0.32                   | 0.507            | C                | 0.31%                  | 0.32                  | 2.47%              | 0.008             | 0.05%          | 0.68          | 0.06%                     | 0.65                     |
| 473 | 4   | GRID2 | rs6854968  | 94452990      | 107.05        | 0.40                   | 0.174            | C                | 0.00%                  | 0.94                  | 0.22%              | 0.4               | 0.01%          | 0.83          | 0.01%                     | 0.87                     |
| 474 | 4   | GRID2 | rs3890316  | 94461921      | 107.05        | 0.29                   | 0.479            | G                | 1.53%                  | 0.035                 | 0.08%              | 0.6               | 0.35%          | 0.3           | 0.18%                     | 0.46                     |
| 475 | 4   | GRID2 | rs1433666  | 94471383      | 107.06        | 0.40                   | 0.449            | T                | 0.42%                  | 0.24                  | 0.11%              | 0.6               | 0.04%          | 0.71          | 0.17%                     | 0.44                     |
| 476 | 4   | GRID2 | rs2163959  | 94474279      | 107.06        | 0.16                   | 1.000            | G                | 0.01%                  | 0.87                  | 0.62%              | 0.2               | 0.03%          | 0.74          | 0.01%                     | 0.89                     |
| 477 | 4   | GRID2 | rs2870699  | 94492353      | 107.06        | 0.35                   | 0.522            | T                | 3.98%                  | 0.00033               | 0.81%              | 0.13              | 0.06%          | 0.66          | 1.43%                     | 0.023                    |
| 478 | 4   | GRID2 | rs1583337  | 94502359      | 107.07        | 0.45                   | 0.664            | T                | 3.38%                  | 0.00129               | 0.29%              | 0.4               | 0.25%          | 0.35          | 1.06%                     | 0.053                    |
| 479 | 4   | GRID2 | rs1948016  | 94531366      | 107.08        | 0.41                   | 0.651            | T                | 2.28%                  | 0.0081                | 0.26%              | 0.4               | 0.00%          | 0.93          | 0.84%                     | 0.092                    |
| 480 | 4   | GRID2 | rs1485012  | 94542392      | 107.08        | 0.11                   | 0.038            | C                | 0.07%                  | 0.65                  | 0.70%              | 0.14              | 0.49%          | 0.18          | 0.04%                     | 0.71                     |
| 481 | 4   | GRID2 | rs1948017  | 94553839      | 107.09        | 0.13                   | 1.000            | A                | 0.18%                  | 0.46                  | 0.34%              | 0.3               | 0.43%          | 0.22          | 0.25%                     | 0.34                     |
| 482 | 4   | GRID2 | rs1905733  | 94554163      | 107.09        | 0.02                   | 1.000            | T                | 0.43%                  | 0.3                   | 0.46%              | 0.3               | 1.03%          | 0.097         | 0.18%                     | 0.46                     |
| 483 | 4   | GRID2 | rs10516921 | 94596757      | 107.10        | 0.02                   | 1.000            | T                | 0.00%                  | 0.99                  | 1.56%              | 0.05              | 0.47%          | 0.26          | 0.02%                     | 0.83                     |
| 484 | 4   | GRID2 | rs1485015  | 94609228      | 107.11        | 0.33                   | 0.624            | T                | 2.15%                  | 0.0091                | 0.00%              | 0.9               | 0.06%          | 0.65          | 0.38%                     | 0.25                     |
| 485 | 4   | GRID2 | rs2200375  | 94610021      | 107.11        | 0.24                   | 0.694            | G                | 0.48%                  | 0.22                  | 0.01%              | 0.9               | 0.08%          | 0.61          | 0.13%                     | 0.5                      |
| 486 | 4   | GRID2 | rs4557232  | 94649460      | 107.12        | 0.24                   | 0.006            | A                | 0.53%                  | 0.21                  | 0.19%              | 0.5               | 0.22%          | 0.4           | 0.02%                     | 0.78                     |
| 487 | 4   | GRID2 | rs9307127  | 94653793      | 107.12        | 0.30                   | 0.388            | C                | 1.87%                  | 0.016                 | 0.00%              | 0.9               | 0.00%          | 0.93          | 0.81%                     | 0.094                    |
| 488 | 4   | GRID2 | rs4286488  | 94659049      | 107.12        | 0.21                   | 0.283            | A                | 1.89%                  | 0.016                 | 0.17%              | 0.5               | 0.51%          | 0.21          | 0.16%                     | 0.46                     |
| 489 | 4   | GRID2 | rs6841321  | 94663865      | 107.13        | 0.23                   | 0.104            | G                | 1.18%                  | 0.054                 | 1.32%              | 0.06              | 0.53%          | 0.19          | 0.03%                     | 0.75                     |
| 490 | 4   | GRID2 | rs1369465  | 94671971      | 107.13        | 0.24                   | 0.230            | T                | 0.47%                  | 0.22                  | 0.68%              | 0.2               | 1.02%          | 0.071         | 0.35%                     | 0.27                     |
| 491 | 4   | GRID2 | rs1369464  | 94681259      | 107.13        | 0.07                   | 0.010            | G                | 0.17%                  | 0.48                  | 0.50%              | 0.2               | 0.04%          | 0.71          | 0.03%                     | 0.73                     |
| 492 | 4   | GRID2 | rs9991666  | 94693931      | 107.14        | 0.43                   | 0.883            | C                | 0.07%                  | 0.64                  | 0.42%              | 0.3               | 0.67%          | 0.146         | 1.25%                     | 0.04                     |
| 493 | 4   | GRID2 | rs2196320  | 94722771      | 107.15        | 0.27                   | 0.470            | A                | 3.25%                  | 0.0021                | 0.05%              | 0.7               | 0.00%          | 0.97          | 0.73%                     | 0.12                     |
| 494 | 4   | GRID2 | rs1435475  | 94747783      | 107.15        | 0.03                   | 1.000            | G                | 0.39%                  | 0.36                  | 0.94%              | 0.14              | 0.18%          | 0.51          | 0.17%                     | 0.46                     |
| 495 | 4   | GRID2 | rs10516926 | 94756177      | 107.16        | 0.22                   | 0.835            | G                | 1.54%                  | 0.027                 | 1.39%              | 0.05              | 0.31%          | 0.31          | 0.00%                     | 1                        |
| 496 | 4   | GRID2 | rs1435476  | 94759989      | 107.16        | 0.19                   | 0.651            | G                | 0.27%                  | 0.39                  | 0.73%              | 0.2               | 0.45%          | 0.24          | 0.82%                     | 0.099                    |

|     | Q                     | R                    | S                  | T                 | U              | V             | W              | X             | Y                 | Z                | AA                    | AB                   | AC                         | AD                        | AE                     | AF                    |
|-----|-----------------------|----------------------|--------------------|-------------------|----------------|---------------|----------------|---------------|-------------------|------------------|-----------------------|----------------------|----------------------------|---------------------------|------------------------|-----------------------|
| 1   | H2_Letter-Number Span | P_Letter-Number Span | H2_Verbal learning | P_Verbal learning | H2_Abstraction | P_Abstraction | H2_Face memory | P_Face memory | H2_Spatial memory | P_Spatial memory | H2_Spatial processing | P_Spatial processing | H2_Sensori-motor dexterity | P_Sensori-motor dexterity | H2_Emotion recognition | P_Emotion recognition |
| 464 | 1.23%                 | 0.04                 | 0.96%              | 0.072             | 0.86%          | 0.1           | 0.13%          | 0.5           | 0.03%             | 0.75             | 1.97%                 | 0.017                | 0.32%                      | 0.3                       | 0.15%                  | 0.5                   |
| 465 | 0.16%                 | 0.5                  | 0.59%              | 0.15              | 0.28%          | 0.3           | 0.63%          | 0.2           | 0.08%             | 0.61             | 0.61%                 | 0.19                 | 0.02%                      | 0.8                       | 0.02%                  | 0.8                   |
| 466 | 1.51%                 | 0.02                 | 1.04%              | 0.054             | 0.07%          | 0.6           | 0.36%          | 0.3           | 0.39%             | 0.27             | 0.84%                 | 0.118                | 0.00%                      | 0.9                       | 0.12%                  | 0.5                   |
| 467 | 0.29%                 | 0.3                  | 0.80%              | 0.093             | 0.03%          | 0.8           | 0.78%          | 0.11          | 0.72%             | 0.134            | 0.86%                 | 0.113                | 0.13%                      | 0.5                       | 0.02%                  | 0.8                   |
| 468 | 0.01%                 | 0.9                  | 0.45%              | 0.19              | 0.16%          | 0.5           | 0.23%          | 0.4           | 0.00%             | 0.94             | 0.80%                 | 0.106                | 0.55%                      | 0.2                       | 0.06%                  | 0.6                   |
| 469 | 0.19%                 | 0.4                  | 0.90%              | 0.083             | 0.50%          | 0.2           | 0.04%          | 0.7           | 0.01%             | 0.88             | 2.30%                 | 0.0104               | 0.12%                      | 0.5                       | 0.02%                  | 0.8                   |
| 470 | 0.22%                 | 0.4                  | 0.02%              | 0.77              | 0.11%          | 0.5           | 0.05%          | 0.6           | 0.00%             | 0.9              | 0.10%                 | 0.57                 | 0.03%                      | 0.8                       | 0.07%                  | 0.6                   |
| 471 | 0.06%                 | 0.6                  | 0.59%              | 0.137             | 0.28%          | 0.3           | 0.02%          | 0.8           | 0.04%             | 0.7              | 1.09%                 | 0.066                | 0.26%                      | 0.3                       | 0.26%                  | 0.3                   |
| 472 | 0.03%                 | 0.7                  | 0.25%              | 0.33              | 0.68%          | 0.12          | 0.02%          | 0.8           | 0.14%             | 0.48             | 1.61%                 | 0.024                | 0.20%                      | 0.4                       | 0.50%                  | 0.2                   |
| 473 | 0.00%                 | 1                    | 0.24%              | 0.35              | 0.46%          | 0.2           | 0.01%          | 0.9           | 0.27%             | 0.34             | 0.24%                 | 0.38                 | 0.12%                      | 0.5                       | 0.68%                  | 0.12                  |
| 474 | 1.70%                 | 0.02                 | 0.02%              | 0.79              | 0.93%          | 0.08          | 0.11%          | 0.6           | 0.03%             | 0.75             | 0.67%                 | 0.17                 | 0.00%                      | 1                         | 0.00%                  | 0.9                   |
| 475 | 0.05%                 | 0.7                  | 0.41%              | 0.21              | 0.23%          | 0.4           | 0.11%          | 0.5           | 0.14%             | 0.49             | 0.21%                 | 0.41                 | 0.03%                      | 0.8                       | 1.49%                  | 0.02                  |
| 476 | 0.31%                 | 0.3                  | 0.08%              | 0.58              | 0.14%          | 0.5           | 0.11%          | 0.5           | 0.02%             | 0.77             | 0.00%                 | 0.98                 | 0.16%                      | 0.5                       | 0.29%                  | 0.3                   |
| 477 | 0.94%                 | 0.06                 | 0.27%              | 0.31              | 0.93%          | 0.07          | 0.01%          | 0.8           | 0.15%             | 0.47             | 0.25%                 | 0.38                 | 0.00%                      | 1                         | 0.07%                  | 0.6                   |
| 478 | 0.98%                 | 0.06                 | 0.03%              | 0.72              | 0.58%          | 0.2           | 0.04%          | 0.7           | 0.04%             | 0.71             | 0.00%                 | 0.92                 | 0.04%                      | 0.7                       | 0.14%                  | 0.5                   |
| 479 | 0.59%                 | 0.14                 | 0.56%              | 0.15              | 0.04%          | 0.7           | 0.06%          | 0.6           | 0.22%             | 0.39             | 0.00%                 | 0.96                 | 0.03%                      | 0.7                       | 0.18%                  | 0.4                   |
| 480 | 0.00%                 | 0.9                  | 0.00%              | 0.89              | 0.03%          | 0.7           | 0.07%          | 0.6           | 0.01%             | 0.88             | 0.19%                 | 0.42                 | 0.24%                      | 0.3                       | 0.18%                  | 0.4                   |
| 481 | 1.33%                 | 0.03                 | 0.27%              | 0.31              | 0.52%          | 0.2           | 0.25%          | 0.3           | 0.31%             | 0.3              | 0.32%                 | 0.32                 | 0.02%                      | 0.8                       | 1.00%                  | 0.06                  |
| 482 | 0.03%                 | 0.8                  | 0.40%              | 0.26              | 0.00%          | 0.9           | 0.42%          | 0.3           | 0.13%             | 0.59             | 0.00%                 | 0.95                 | 0.33%                      | 0.4                       | 1.47%                  | 0.06                  |
| 483 | 0.03%                 | 0.8                  | 0.28%              | 0.34              | 0.05%          | 0.7           | 0.95%          | 0.07          | 0.28%             | 0.34             | 0.00%                 | 0.97                 | 0.14%                      | 0.5                       | 0.34%                  | 0.3                   |
| 484 | 0.16%                 | 0.4                  | 0.30%              | 0.29              | 0.01%          | 0.9           | 0.00%          | 1             | 0.02%             | 0.78             | 0.09%                 | 0.59                 | 0.08%                      | 0.6                       | 1.42%                  | 0.03                  |
| 485 | 0.19%                 | 0.4                  | 0.11%              | 0.53              | 0.12%          | 0.5           | 0.04%          | 0.7           | 0.19%             | 0.42             | 0.01%                 | 0.89                 | 0.00%                      | 1                         | 0.21%                  | 0.4                   |
| 486 | 0.57%                 | 0.2                  | 0.12%              | 0.51              | 0.01%          | 0.8           | 0.06%          | 0.6           | 0.27%             | 0.35             | 0.20%                 | 0.43                 | 1.81%                      | 0.013                     | 0.00%                  | 0.9                   |
| 487 | 0.79%                 | 0.09                 | 1.37%              | 0.024             | 0.76%          | 0.1           | 0.74%          | 0.1           | 0.39%             | 0.25             | 0.44%                 | 0.23                 | 0.02%                      | 0.8                       | 0.58%                  | 0.2                   |
| 488 | 0.60%                 | 0.15                 | 0.22%              | 0.38              | 0.72%          | 0.12          | 0.58%          | 0.2           | 0.89%             | 0.089            | 0.19%                 | 0.45                 | 1.63%                      | 0.02                      | 0.17%                  | 0.4                   |
| 489 | 0.36%                 | 0.2                  | 0.10%              | 0.54              | 0.30%          | 0.3           | 0.09%          | 0.6           | 0.01%             | 0.83             | 0.00%                 | 0.98                 | 0.18%                      | 0.4                       | 0.00%                  | 1                     |
| 490 | 0.22%                 | 0.4                  | 0.37%              | 0.25              | 0.58%          | 0.2           | 0.71%          | 0.11          | 0.52%             | 0.19             | 0.10%                 | 0.58                 | 0.87%                      | 0.09                      | 0.09%                  | 0.6                   |
| 491 | 0.65%                 | 0.11                 | 0.17%              | 0.42              | 0.62%          | 0.12          | 0.08%          | 0.6           | 0.15%             | 0.47             | 0.00%                 | 0.91                 | 0.42%                      | 0.2                       | 0.19%                  | 0.4                   |
| 492 | 0.00%                 | 0.9                  | 0.79%              | 0.092             | 0.11%          | 0.5           | 0.24%          | 0.4           | 0.23%             | 0.38             | 0.01%                 | 0.84                 | 0.16%                      | 0.5                       | 0.11%                  | 0.5                   |
| 493 | 1.17%                 | 0.04                 | 0.66%              | 0.128             | 1.29%          | 0.03          | 0.16%          | 0.5           | 0.38%             | 0.27             | 0.03%                 | 0.77                 | 0.14%                      | 0.5                       | 0.55%                  | 0.2                   |
| 494 | 0.40%                 | 0.2                  | 0.35%              | 0.29              | 0.03%          | 0.8           | 0.01%          | 0.8           | 0.32%             | 0.33             | 0.63%                 | 0.17                 | 0.03%                      | 0.7                       | 0.13%                  | 0.5                   |
| 495 | 1.19%                 | 0.03                 | 0.00%              | 0.9               | 0.58%          | 0.15          | 0.02%          | 0.8           | 0.12%             | 0.52             | 0.00%                 | 0.92                 | 0.12%                      | 0.5                       | 0.07%                  | 0.6                   |
| 496 | 0.09%                 | 0.6                  | 0.01%              | 0.84              | 0.16%          | 0.5           | 0.01%          | 0.8           | 1.16%             | 0.057            | 0.02%                 | 0.79                 | 0.37%                      | 0.3                       | 0.01%                  | 0.9                   |

|     | A   | B       | C          | D             | E             | F                      | G                | H                | I                      | J                     | K                  | L                 | M              | N             | O                         | P                        |
|-----|-----|---------|------------|---------------|---------------|------------------------|------------------|------------------|------------------------|-----------------------|--------------------|-------------------|----------------|---------------|---------------------------|--------------------------|
| 1   | Chr | Gene    | SNP ID     | Position (bp) | Position (cM) | Minor allele frequency | Hardy-Weinberg P | Reference allele | H2_Prepulse inhibition | P_Prepulse inhibition | H2_P50 suppression | P_P50 suppression | H2_Antisaccade | P_Antisaccade | H2_Continuous performance | P_Continuous performance |
| 497 | 4   | GRID2   | rs1435477  | 94762390      | 107.16        | 0.44                   | 0.466            | A                | 0.00%                  | 0.91                  | 3.82%              | 0.0015            | 0.31%          | 0.32          | 0.12%                     | 0.52                     |
| 498 | 4   | GRID2   | rs10516930 | 94776709      | 107.17        | 0.30                   | 1.000            | C                | 0.25%                  | 0.38                  | 1.84%              | 0.03              | 0.02%          | 0.81          | 0.18%                     | 0.43                     |
| 499 | 4   | GRID2   | rs10516931 | 94778088      | 107.17        | 0.10                   | 0.225            | A                | 0.69%                  | 0.14                  | 1.18%              | 0.1               | 0.27%          | 0.34          | 0.43%                     | 0.23                     |
| 500 | 4   | GRID2   | rs10516933 | 94789431      | 107.17        | 0.21                   | 0.666            | G                | 0.16%                  | 0.48                  | 1.24%              | 0.07              | 0.11%          | 0.54          | 0.13%                     | 0.49                     |
| 501 | 4   | GRID2   | rs10516940 | 94813222      | 107.18        | 0.35                   | 0.340            | C                | 0.75%                  | 0.117                 | 0.04%              | 0.7               | 0.04%          | 0.7           | 0.04%                     | 0.68                     |
| 502 | 4   | GRID2   | rs11946557 | 94816124      | 107.18        | 0.01                   | 1.000            | G                | 0.47%                  | 0.36                  | 1.22%              | 0.14              | 1.19%          | 0.113         | 0.09%                     | 0.58                     |
| 503 | 4   | GRID2   | rs2196321  | 94832181      | 107.18        | 0.48                   | 0.884            | A                | 0.56%                  | 0.19                  | 0.01%              | 0.9               | 0.13%          | 0.51          | 0.12%                     | 0.52                     |
| 504 | 4   | GRID2   | rs10516941 | 94842434      | 107.19        | 0.04                   | 1.000            | A                | 0.18%                  | 0.45                  | 0.03%              | 0.8               | 0.84%          | 0.069         | 0.33%                     | 0.27                     |
| 505 | 4   | GRID2   | rs6850113  | 94853325      | 107.19        | 0.31                   | 0.493            | C                | 0.24%                  | 0.4                   | 0.16%              | 0.5               | 0.03%          | 0.77          | 0.01%                     | 0.88                     |
| 506 | 4   | GRID2   | rs1439543  | 94857136      | 107.19        | 0.12                   | 0.138            | T                | 0.33%                  | 0.32                  | 1.09%              | 0.09              | 0.60%          | 0.16          | 0.33%                     | 0.3                      |
| 507 | 4   | GRID2   | rs4692990  | 94891726      | 107.21        | 0.19                   | 0.640            | A                | 0.23%                  | 0.38                  | 0.02%              | 0.8               | 0.70%          | 0.123         | 0.14%                     | 0.47                     |
| 508 | 4   | GRID2   | rs10516943 | 94894653      | 107.21        | 0.04                   | 0.278            | G                | 0.18%                  | 0.48                  | 0.27%              | 0.4               | 0.34%          | 0.28          | 0.13%                     | 0.48                     |
| 509 | 4   | GRID2   | rs7662498  | 94896866      | 107.21        | 0.07                   | 1.000            | G                | 0.05%                  | 0.72                  | 0.10%              | 0.6               | 0.30%          | 0.35          | 1.09%                     | 0.069                    |
| 510 | 4   | GRID2   | rs13101891 | 94899563      | 107.21        | 0.20                   | 0.366            | T                | 0.62%                  | 0.18                  | 0.27%              | 0.4               | 0.00%          | 0.98          | 0.20%                     | 0.41                     |
| 511 | 5   | SLC6A3  | rs40184    | 1448077       | 1.68          | 0.48                   | 0.312            | A                | 0.02%                  | 0.81                  | 0.01%              | 0.9               | 0.02%          | 0.78          | 0.68%                     | 0.133                    |
| 512 | 5   | SLC6A3  | rs11564773 | 1449813       | 1.68          | 0.10                   | 0.406            | A                | 0.00%                  | 0.92                  | 0.32%              | 0.4               | 0.26%          | 0.37          | 0.42%                     | 0.26                     |
| 513 | 5   | SLC6A3  | rs6869645  | 1457548       | 1.71          | 0.07                   | 0.092            | C                | 0.02%                  | 0.82                  | 0.32%              | 0.3               | 0.06%          | 0.67          | 0.21%                     | 0.42                     |
| 514 | 5   | SLC6A3  | rs2550936  | 1464256       | 1.74          | 0.26                   | 0.359            | A                | 0.21%                  | 0.44                  | 0.26%              | 0.4               | 0.03%          | 0.74          | 0.25%                     | 0.36                     |
| 515 | 5   | SLC6A3  | rs6347     | 1464412       | 1.74          | 0.23                   | 0.681            | A                | 0.03%                  | 0.76                  | 1.68%              | 0.04              | 0.00%          | 0.92          | 0.08%                     | 0.61                     |
| 516 | 5   | SLC6A3  | rs11564758 | 1473588       | 1.78          | 0.35                   | 0.200            | G                | 0.07%                  | 0.62                  | 0.25%              | 0.4               | 0.26%          | 0.32          | 1.28%                     | 0.028                    |
| 517 | 5   | SLC6A3  | rs463379   | 1484164       | 1.82          | 0.21                   | 1.000            | C                | 0.21%                  | 0.42                  | 0.10%              | 0.6               | 0.09%          | 0.59          | 0.00%                     | 1                        |
| 518 | 5   | SLC6A3  | rs403636   | 1491354       | 1.85          | 0.21                   | 0.674            | G                | 0.36%                  | 0.31                  | 1.04%              | 0.09              | 0.35%          | 0.3           | 0.92%                     | 0.078                    |
| 519 | 5   | SLC6A3  | rs6350     | 1496199       | 1.87          | 0.05                   | 0.441            | C                | 0.02%                  | 0.82                  | 0.05%              | 0.7               | 0.00%          | 0.92          | 0.17%                     | 0.44                     |
| 520 | 5   | SLC6A3  | rs2963238  | 1497427       | 1.87          | 0.43                   | 0.556            | C                | 0.02%                  | 0.78                  | 0.42%              | 0.3               | 0.03%          | 0.77          | 0.08%                     | 0.59                     |
| 521 | 5   | HTR1A   | rs1423691  | 63287418      | 75.40         | 0.46                   | 0.385            | C                | 0.84%                  | 0.105                 | 0.43%              | 0.3               | 0.53%          | 0.18          | 0.00%                     | 0.92                     |
| 522 | 5   | NEUROG1 | rs2344485  | 134896540     | 147.93        | 0.08                   | 0.081            | G                | 0.04%                  | 0.71                  | 0.03%              | 0.8               | 0.07%          | 0.63          | 1.05%                     | 0.053                    |
| 523 | 5   | NEUROG1 | rs2344484  | 134904530     | 147.93        | 0.41                   | 0.097            | T                | 0.06%                  | 0.65                  | 0.10%              | 0.6               | 0.32%          | 0.31          | 0.32%                     | 0.29                     |
| 524 | 5   | HTR4    | rs1985524  | 147827981     | 160.50        | 0.46                   | 0.561            | C                | 0.05%                  | 0.7                   | 0.00%              | 1                 | 0.24%          | 0.39          | 0.00%                     | 0.91                     |
| 525 | 5   | HTR4    | rs10062444 | 147834255     | 160.50        | 0.06                   | 1.000            | A                | 0.31%                  | 0.36                  | 0.05%              | 0.7               | 0.05%          | 0.7           | 0.24%                     | 0.4                      |
| 526 | 5   | HTR4    | rs2005953  | 147847332     | 160.50        | 0.40                   | 0.548            | G                | 0.00%                  | 0.96                  | 0.68%              | 0.2               | 0.34%          | 0.32          | 0.33%                     | 0.31                     |
| 527 | 5   | HTR4    | rs6865878  | 147891909     | 160.50        | 0.01                   | 1.000            | G                | 0.22%                  | 0.39                  | 0.23%              | 0.5               | 0.06%          | 0.66          | 0.46%                     | 0.2                      |
| 528 | 5   | HTR4    | rs1432917  | 147901079     | 160.50        | 0.07                   | 1.000            | T                | 0.16%                  | 0.52                  | 0.00%              | 1                 | 0.01%          | 0.85          | 0.00%                     | 1                        |
| 529 | 5   | HTR4    | rs2278392  | 147908418     | 160.50        | 0.11                   | 0.455            | G                | 0.55%                  | 0.21                  | 0.56%              | 0.2               | 0.01%          | 0.87          | 0.02%                     | 0.77                     |

|     | Q                     | R                    | S                  | T                 | U              | V             | W              | X             | Y                 | Z                | AA                    | AB                   | AC                         | AD                        | AE                     | AF                    |
|-----|-----------------------|----------------------|--------------------|-------------------|----------------|---------------|----------------|---------------|-------------------|------------------|-----------------------|----------------------|----------------------------|---------------------------|------------------------|-----------------------|
| 1   | H2_Letter-Number Span | P_Letter-Number Span | H2_Verbal learning | P_Verbal learning | H2_Abstraction | P_Abstraction | H2_Face memory | P_Face memory | H2_Spatial memory | P_Spatial memory | H2_Spatial processing | P_Spatial processing | H2_Sensori-motor dexterity | P_Sensori-motor dexterity | H2_Emotion recognition | P_Emotion recognition |
| 497 | 0.33%                 | 0.3                  | 0.00%              | 0.98              | 0.23%          | 0.4           | 0.18%          | 0.4           | 0.00%             | 0.95             | 0.16%                 | 0.49                 | 0.15%                      | 0.5                       | 0.40%                  | 0.2                   |
| 498 | 0.03%                 | 0.7                  | 0.02%              | 0.81              | 0.98%          | 0.06          | 0.04%          | 0.7           | 0.00%             | 0.99             | 0.31%                 | 0.32                 | 0.59%                      | 0.2                       | 0.87%                  | 0.08                  |
| 499 | 0.60%                 | 0.14                 | 0.57%              | 0.149             | 0.09%          | 0.6           | 0.15%          | 0.5           | 0.00%             | 0.9              | 0.47%                 | 0.23                 | 1.34%                      | 0.03                      | 0.45%                  | 0.2                   |
| 500 | 0.97%                 | 0.05                 | 0.01%              | 0.83              | 0.40%          | 0.2           | 0.38%          | 0.2           | 0.14%             | 0.5              | 0.02%                 | 0.81                 | 0.33%                      | 0.3                       | 0.03%                  | 0.7                   |
| 501 | 0.39%                 | 0.2                  | 0.32%              | 0.26              | 0.35%          | 0.3           | 0.19%          | 0.4           | 0.82%             | 0.084            | 0.28%                 | 0.32                 | 1.93%                      | 0.008                     | 0.18%                  | 0.4                   |
| 502 | 0.00%                 | 1                    | 0.74%              | 0.119             | 0.12%          | 0.5           | 0.03%          | 0.7           | 1.09%             | 0.04             | 0.15%                 | 0.44                 | 0.08%                      | 0.6                       | 0.08%                  | 0.6                   |
| 503 | 0.39%                 | 0.2                  | 0.30%              | 0.3               | 0.62%          | 0.2           | 0.47%          | 0.2           | 0.43%             | 0.23             | 0.64%                 | 0.16                 | 0.93%                      | 0.08                      | 0.03%                  | 0.7                   |
| 504 | 0.86%                 | 0.07                 | 0.55%              | 0.14              | 0.37%          | 0.2           | 0.00%          | 1             | 0.56%             | 0.144            | 0.04%                 | 0.7                  | 0.03%                      | 0.7                       | 0.03%                  | 0.7                   |
| 505 | 0.28%                 | 0.3                  | 0.34%              | 0.26              | 0.44%          | 0.2           | 0.82%          | 0.09          | 0.59%             | 0.16             | 0.10%                 | 0.57                 | 1.11%                      | 0.05                      | 0.00%                  | 1                     |
| 506 | 0.04%                 | 0.7                  | 0.39%              | 0.24              | 0.02%          | 0.8           | 0.19%          | 0.4           | 0.10%             | 0.56             | 0.33%                 | 0.33                 | 0.38%                      | 0.3                       | 0.14%                  | 0.5                   |
| 507 | 0.06%                 | 0.6                  | 0.01%              | 0.82              | 0.32%          | 0.3           | 0.42%          | 0.2           | 0.00%             | 0.89             | 0.20%                 | 0.39                 | 0.13%                      | 0.5                       | 0.08%                  | 0.6                   |
| 508 | 1.07%                 | 0.04                 | 0.27%              | 0.3               | 0.16%          | 0.4           | 0.21%          | 0.4           | 0.72%             | 0.107            | 0.07%                 | 0.62                 | 0.88%                      | 0.07                      | 0.04%                  | 0.7                   |
| 509 | 0.31%                 | 0.3                  | 0.04%              | 0.72              | 0.22%          | 0.4           | 0.04%          | 0.7           | 0.62%             | 0.19             | 0.00%                 | 0.96                 | 0.11%                      | 0.6                       | 0.04%                  | 0.7                   |
| 510 | 0.14%                 | 0.5                  | 0.03%              | 0.74              | 0.01%          | 0.9           | 0.11%          | 0.5           | 0.64%             | 0.15             | 0.59%                 | 0.18                 | 0.08%                      | 0.6                       | 0.00%                  | 1                     |
| 511 | 0.27%                 | 0.3                  | 0.03%              | 0.73              | 0.35%          | 0.3           | 0.01%          | 0.9           | 1.16%             | 0.051            | 0.01%                 | 0.88                 | 0.28%                      | 0.3                       | 0.12%                  | 0.5                   |
| 512 | 0.19%                 | 0.4                  | 0.06%              | 0.65              | 1.67%          | 0.02          | 2.12%          | 0.007         | 1.04%             | 0.066            | 1.77%                 | 0.021                | 3.08%                      | 0.0014                    | 0.78%                  | 0.11                  |
| 513 | 0.01%                 | 0.8                  | 0.02%              | 0.8               | 0.78%          | 0.11          | 1.41%          | 0.02          | 0.18%             | 0.43             | 1.43%                 | 0.037                | 2.72%                      | 0.002                     | 0.33%                  | 0.3                   |
| 514 | 0.18%                 | 0.4                  | 0.47%              | 0.19              | 0.13%          | 0.5           | 0.30%          | 0.3           | 0.17%             | 0.46             | 0.86%                 | 0.112                | 0.02%                      | 0.8                       | 0.36%                  | 0.3                   |
| 515 | 0.08%                 | 0.6                  | 0.04%              | 0.71              | 0.04%          | 0.7           | 0.16%          | 0.5           | 0.14%             | 0.5              | 0.91%                 | 0.099                | 0.76%                      | 0.11                      | 0.18%                  | 0.4                   |
| 516 | 1.18%                 | 0.03                 | 0.41%              | 0.19              | 0.00%          | 0.9           | 1.69%          | 0.01          | 0.02%             | 0.78             | 2.80%                 | 0.0019               | 0.74%                      | 0.09                      | 1.26%                  | 0.03                  |
| 517 | 0.02%                 | 0.8                  | 0.04%              | 0.69              | 0.27%          | 0.3           | 0.09%          | 0.6           | 0.26%             | 0.34             | 0.16%                 | 0.47                 | 0.64%                      | 0.13                      | 0.01%                  | 0.9                   |
| 518 | 0.02%                 | 0.8                  | 0.18%              | 0.42              | 0.17%          | 0.4           | 0.92%          | 0.08          | 0.14%             | 0.51             | 0.45%                 | 0.24                 | 0.25%                      | 0.4                       | 0.26%                  | 0.4                   |
| 519 | 0.16%                 | 0.4                  | 0.35%              | 0.27              | 0.04%          | 0.7           | 0.75%          | 0.09          | 0.43%             | 0.21             | 0.29%                 | 0.31                 | 0.02%                      | 0.8                       | 0.43%                  | 0.2                   |
| 520 | 0.01%                 | 0.9                  | 0.00%              | 1                 | 0.40%          | 0.2           | 1.02%          | 0.06          | 0.19%             | 0.43             | 0.04%                 | 0.74                 | 0.79%                      | 0.11                      | 0.20%                  | 0.4                   |
| 521 | 0.32%                 | 0.3                  | 2.18%              | 0.0043            | 0.03%          | 0.7           | 0.01%          | 0.8           | 0.00%             | 0.9              | 0.12%                 | 0.55                 | 0.01%                      | 0.8                       | 0.45%                  | 0.2                   |
| 522 | 0.04%                 | 0.7                  | 0.14%              | 0.47              | 0.16%          | 0.4           | 0.01%          | 0.8           | 0.03%             | 0.74             | 0.33%                 | 0.28                 | 0.02%                      | 0.8                       | 0.08%                  | 0.6                   |
| 523 | 0.30%                 | 0.3                  | 0.13%              | 0.48              | 0.11%          | 0.5           | 0.00%          | 0.9           | 0.27%             | 0.33             | 0.30%                 | 0.33                 | 0.18%                      | 0.4                       | 0.07%                  | 0.6                   |
| 524 | 0.61%                 | 0.14                 | 0.00%              | 0.98              | 0.57%          | 0.2           | 1.46%          | 0.03          | 0.32%             | 0.31             | 0.23%                 | 0.41                 | 0.24%                      | 0.4                       | 0.04%                  | 0.7                   |
| 525 | 0.14%                 | 0.5                  | 0.06%              | 0.66              | 0.00%          | 1             | 0.09%          | 0.6           | 0.00%             | 0.99             | 0.02%                 | 0.83                 | 0.20%                      | 0.4                       | 0.30%                  | 0.3                   |
| 526 | 0.42%                 | 0.2                  | 0.30%              | 0.32              | 0.04%          | 0.7           | 0.00%          | 0.9           | 0.05%             | 0.68             | 0.10%                 | 0.59                 | 2.94%                      | 0.0006                    | 0.88%                  | 0.08                  |
| 527 | 0.65%                 | 0.13                 | 0.14%              | 0.47              | 0.02%          | 0.8           | 0.00%          | 0.9           | 0.60%             | 0.139            | 0.22%                 | 0.38                 | 0.02%                      | 0.8                       | 0.12%                  | 0.5                   |
| 528 | 0.02%                 | 0.8                  | 0.13%              | 0.5               | 0.45%          | 0.2           | 0.54%          | 0.2           | 0.28%             | 0.32             | 0.10%                 | 0.57                 | 0.35%                      | 0.3                       | 0.24%                  | 0.3                   |
| 529 | 0.26%                 | 0.3                  | 0.13%              | 0.5               | 0.30%          | 0.3           | 0.63%          | 0.14          | 0.09%             | 0.58             | 0.58%                 | 0.17                 | 0.63%                      | 0.2                       | 0.41%                  | 0.2                   |



|     | A   | B      | C          | D             | E             | F                      | G                | H                | I                      | J                     | K                  | L                 | M              | N             | O                         | P                        |
|-----|-----|--------|------------|---------------|---------------|------------------------|------------------|------------------|------------------------|-----------------------|--------------------|-------------------|----------------|---------------|---------------------------|--------------------------|
| 1   | Chr | Gene   | SNP ID     | Position (bp) | Position (cM) | Minor allele frequency | Hardy-Weinberg P | Reference allele | H2_Prepulse inhibition | P_Prepulse inhibition | H2_P50 suppression | P_P50 suppression | H2_Antisaccade | P_Antisaccade | H2_Continuous performance | P_Continuous performance |
| 530 | 5   | HTR4   | rs7731872  | 147927154     |               | 0.00                   | 1.000            |                  |                        |                       |                    |                   |                |               |                           |                          |
| 531 | 5   | HTR4   | rs4599527  | 147932732     | 160.50        | 0.15                   | 0.264            | T                | 0.41%                  | 0.28                  | 0.03%              | 0.8               | 0.02%          | 0.82          | 0.11%                     | 0.55                     |
| 532 | 5   | HTR4   | rs4489051  | 147934678     | 160.50        | 0.03                   | 1.000            | A                | 0.35%                  | 0.32                  | 0.11%              | 0.6               | 0.06%          | 0.67          | 0.24%                     | 0.36                     |
| 533 | 5   | HTR4   | rs1833710  | 147947939     | 160.50        | 0.14                   | 1.000            | T                | 0.01%                  | 0.86                  | 0.00%              | 1                 | 0.01%          | 0.86          | 0.06%                     | 0.64                     |
| 534 | 5   | HTR4   | rs4280857  | 147952812     | 160.50        | 0.03                   | 0.139            | G                | 0.48%                  | 0.19                  | 0.15%              | 0.6               | 0.73%          | 0.098         | 0.54%                     | 0.18                     |
| 535 | 5   | HTR4   | rs7711800  | 147963048     | 160.50        | 0.50                   | 1.000            | C                | 0.76%                  | 0.139                 | 0.14%              | 0.5               | 0.51%          | 0.21          | 0.02%                     | 0.81                     |
| 536 | 5   | HTR4   | rs1011427  | 147968170     | 160.50        | 0.10                   | 0.645            | C                | 0.08%                  | 0.66                  | 0.00%              | 1                 | 0.11%          | 0.54          | 0.14%                     | 0.5                      |
| 537 | 5   | HTR4   | rs2068190  | 147987206     | 160.50        | 0.45                   | 0.078            | C                | 0.11%                  | 0.6                   | 0.02%              | 0.8               | 0.88%          | 0.105         | 0.04%                     | 0.73                     |
| 538 | 5   | CAMK2A | rs2241695  | 149583017     | 164.06        | 0.45                   | 0.241            | T                | 0.15%                  | 0.51                  | 0.21%              | 0.5               | 0.04%          | 0.72          | 0.37%                     | 0.28                     |
| 539 | 5   | CAMK2A | rs919741   | 149591881     | 164.07        | 0.22                   | 0.835            | G                | 0.93%                  | 0.107                 | 0.10%              | 0.6               | 0.01%          | 0.87          | 1.87%                     | 0.018                    |
| 540 | 5   | CAMK2A | rs3822607  | 149591986     | 164.07        | 0.39                   | 0.759            | T                | 0.46%                  | 0.24                  | 0.00%              | 1                 | 0.05%          | 0.7           | 0.20%                     | 0.42                     |
| 541 | 5   | CAMK2A | rs3776825  | 149600864     | 164.09        | 0.27                   | 0.145            | C                | 0.88%                  | 0.106                 | 0.15%              | 0.5               | 0.03%          | 0.78          | 0.56%                     | 0.18                     |
| 542 | 5   | CAMK2A | rs7701427  | 149613148     | 164.13        | 0.17                   | 0.079            | C                | 0.05%                  | 0.71                  | 0.05%              | 0.7               | 0.40%          | 0.27          | 0.68%                     | 0.135                    |
| 543 | 5   | CAMK2A | rs2304042  | 149625000     | 164.17        | 0.24                   | 0.544            | G                | 0.00%                  | 0.93                  | 0.60%              | 0.2               | 0.24%          | 0.4           | 0.91%                     | 0.093                    |
| 544 | 5   | CAMK2A | rs959059   | 149630732     | 164.19        | 0.08                   | 1.000            | G                | 1.77%                  | 0.027                 | 0.38%              | 0.3               | 0.01%          | 0.87          | 0.05%                     | 0.68                     |
| 545 | 5   | CAMK2A | rs874084   | 149631023     | 164.19        | 0.22                   | 0.531            | C                | 0.48%                  | 0.24                  | 0.00%              | 1                 | 0.26%          | 0.37          | 0.03%                     | 0.74                     |
| 546 | 5   | CAMK2A | rs3797616  | 149633197     |               | 0.00                   | 1.000            |                  |                        |                       |                    |                   |                |               |                           |                          |
| 547 | 5   | CAMK2A | rs10515639 | 149636619     | 164.21        | 0.23                   | 0.105            | C                | 0.73%                  | 0.144                 | 0.18%              | 0.5               | 0.07%          | 0.65          | 0.00%                     | 0.95                     |
| 548 | 5   | CAMK2A | rs1432833  | 149641346     | 164.23        | 0.26                   | 0.038            | A                | 0.72%                  | 0.133                 | 0.01%              | 0.9               | 0.09%          | 0.58          | 0.02%                     | 0.79                     |
| 549 | 5   | CAMK2A | rs3806947  | 149651516     | 164.26        | 0.08                   | 0.635            | G                | 0.29%                  | 0.32                  | 0.25%              | 0.4               | 0.11%          | 0.55          | 0.85%                     | 0.075                    |
| 550 | 5   | CAMK2A | rs1432832  | 149653734     | 164.27        | 0.47                   | 0.308            | C                | 3.97%                  | 0.00081               | 0.62%              | 0.2               | 0.05%          | 0.69          | 0.20%                     | 0.42                     |
| 551 | 5   | GABRB2 | rs592403   | 160652562     | 176.57        | 0.42                   | 0.765            | T                | 0.00%                  | 0.93                  | 0.18%              | 0.5               | 0.12%          | 0.52          | 0.18%                     | 0.43                     |
| 552 | 5   | GABRB2 | rs3850733  | 160670895     | 176.58        | 0.10                   | 0.232            | C                | 0.09%                  | 0.63                  | 1.23%              | 0.08              | 0.08%          | 0.62          | 0.15%                     | 0.49                     |
| 553 | 5   | GABRB2 | rs153296   | 160673511     | 176.58        | 0.19                   | 0.225            | G                | 0.07%                  | 0.64                  | 0.27%              | 0.4               | 0.06%          | 0.67          | 0.63%                     | 0.147                    |
| 554 | 5   | GABRB2 | rs10515827 | 160687535     | 176.58        | 0.17                   | 1.000            | C                | 0.22%                  | 0.4                   | 1.10%              | 0.1               | 0.00%          | 0.99          | 0.01%                     | 0.82                     |
| 555 | 5   | GABRB2 | rs252942   | 160688459     | 176.58        | 0.32                   | 0.623            | A                | 0.01%                  | 0.87                  | 0.47%              | 0.3               | 0.09%          | 0.6           | 0.04%                     | 0.73                     |
| 556 | 5   | GABRB2 | rs187269   | 160689203     | 176.58        | 0.32                   | 0.739            | A                | 0.01%                  | 0.87                  | 0.50%              | 0.3               | 0.07%          | 0.64          | 0.04%                     | 0.73                     |
| 557 | 5   | GABRB2 | rs252944   | 160690915     | 176.58        | 0.13                   | 0.342            | C                | 0.11%                  | 0.51                  | 0.46%              | 0.3               | 0.04%          | 0.69          | 0.37%                     | 0.25                     |
| 558 | 5   | GABRB2 | rs194072   | 160691233     | 176.58        | 0.13                   | 0.343            | A                | 0.12%                  | 0.51                  | 0.47%              | 0.3               | 0.04%          | 0.69          | 0.37%                     | 0.25                     |
| 559 | 5   | GABRB2 | rs1816072  | 160692234     | 176.58        | 0.38                   | 0.646            | T                | 0.04%                  | 0.74                  | 0.87%              | 0.2               | 0.03%          | 0.74          | 0.00%                     | 0.99                     |
| 560 | 5   | GABRB2 | rs1816071  | 160692534     | 176.58        | 0.35                   | 0.751            | A                | 0.10%                  | 0.6                   | 0.17%              | 0.5               | 0.15%          | 0.51          | 0.01%                     | 0.85                     |
| 561 | 5   | GABRB2 | rs967771   | 160694752     | 176.58        | 0.21                   | 0.265            | G                | 0.22%                  | 0.4                   | 0.11%              | 0.6               | 0.65%          | 0.146         | 0.02%                     | 0.79                     |
| 562 | 5   | GABRB2 | rs2910298  | 160724310     | 176.61        | 0.13                   | 0.752            | T                | 1.08%                  | 0.077                 | 0.06%              | 0.7               | 0.11%          | 0.56          | 0.33%                     | 0.3                      |

|     | Q                     | R                    | S                  | T                 | U              | V             | W              | X             | Y                 | Z                | AA                    | AB                   | AC                         | AD                        | AE                     | AF                    |
|-----|-----------------------|----------------------|--------------------|-------------------|----------------|---------------|----------------|---------------|-------------------|------------------|-----------------------|----------------------|----------------------------|---------------------------|------------------------|-----------------------|
| 1   | H2_Letter-Number Span | P_Letter-Number Span | H2_Verbal learning | P_Verbal learning | H2_Abstraction | P_Abstraction | H2_Face memory | P_Face memory | H2_Spatial memory | P_Spatial memory | H2_Spatial processing | P_Spatial processing | H2_Sensori-motor dexterity | P_Sensori-motor dexterity | H2_Emotion recognition | P_Emotion recognition |
| 530 |                       |                      |                    |                   |                |               |                |               |                   |                  |                       |                      |                            |                           |                        |                       |
| 531 | 0.14%                 | 0.5                  | 0.19%              | 0.42              | 0.78%          | 0.1           | 0.33%          | 0.3           | 0.02%             | 0.79             | 0.27%                 | 0.37                 | 0.14%                      | 0.5                       | 0.50%                  | 0.2                   |
| 532 | 0.00%                 | 1                    | 0.28%              | 0.33              | 0.90%          | 0.05          | 0.53%          | 0.14          | 0.01%             | 0.86             | 0.35%                 | 0.31                 | 0.03%                      | 0.7                       | 0.01%                  | 0.9                   |
| 533 | 1.11%                 | 0.04                 | 0.12%              | 0.51              | 0.09%          | 0.6           | 0.01%          | 0.8           | 0.07%             | 0.62             | 0.00%                 | 0.93                 | 0.07%                      | 0.6                       | 0.04%                  | 0.7                   |
| 534 | 0.54%                 | 0.2                  | 0.00%              | 1                 | 0.10%          | 0.6           | 0.00%          | 1             | 1.15%             | 0.051            | 0.35%                 | 0.31                 | 1.89%                      | 0.012                     | 0.36%                  | 0.3                   |
| 535 | 0.77%                 | 0.11                 | 1.44%              | 0.026             | 0.01%          | 0.9           | 0.02%          | 0.8           | 0.01%             | 0.84             | 0.35%                 | 0.31                 | 0.01%                      | 0.9                       | 0.09%                  | 0.6                   |
| 536 | 0.18%                 | 0.4                  | 0.00%              | 0.97              | 0.24%          | 0.4           | 0.89%          | 0.09          | 0.59%             | 0.18             | 0.11%                 | 0.57                 | 1.01%                      | 0.07                      | 0.21%                  | 0.4                   |
| 537 | 1.08%                 | 0.05                 | 1.21%              | 0.043             | 0.77%          | 0.12          | 1.60%          | 0.02          | 0.68%             | 0.15             | 0.03%                 | 0.76                 | 0.54%                      | 0.2                       | 0.09%                  | 0.6                   |
| 538 | 1.80%                 | 0.013                | 0.04%              | 0.72              | 0.15%          | 0.5           | 0.21%          | 0.4           | 0.17%             | 0.47             | 0.13%                 | 0.55                 | 0.16%                      | 0.5                       | 0.01%                  | 0.9                   |
| 539 | 1.42%                 | 0.03                 | 0.03%              | 0.75              | 0.01%          | 0.9           | 0.08%          | 0.6           | 0.01%             | 0.87             | 0.29%                 | 0.37                 | 0.09%                      | 0.6                       | 0.12%                  | 0.5                   |
| 540 | 1.49%                 | 0.02                 | 0.02%              | 0.8               | 0.06%          | 0.6           | 0.00%          | 0.9           | 0.09%             | 0.58             | 0.44%                 | 0.25                 | 0.19%                      | 0.4                       | 0.01%                  | 0.8                   |
| 541 | 0.92%                 | 0.07                 | 0.28%              | 0.32              | 0.01%          | 0.8           | 0.04%          | 0.7           | 0.00%             | 0.94             | 0.02%                 | 0.8                  | 0.04%                      | 0.7                       | 0.06%                  | 0.7                   |
| 542 | 0.06%                 | 0.6                  | 0.32%              | 0.28              | 1.03%          | 0.05          | 0.67%          | 0.11          | 0.34%             | 0.28             | 0.03%                 | 0.75                 | 0.01%                      | 0.9                       | 0.02%                  | 0.8                   |
| 543 | 3.45%                 | 0.0006               | 0.41%              | 0.24              | 0.31%          | 0.3           | 0.84%          | 0.1           | 0.48%             | 0.23             | 0.21%                 | 0.44                 | 0.24%                      | 0.4                       | 0.02%                  | 0.8                   |
| 544 | 0.00%                 | 1                    | 0.01%              | 0.84              | 0.25%          | 0.3           | 0.01%          | 0.8           | 0.19%             | 0.44             | 0.05%                 | 0.68                 | 0.42%                      | 0.2                       | 0.01%                  | 0.9                   |
| 545 | 0.05%                 | 0.7                  | 0.06%              | 0.65              | 0.14%          | 0.5           | 0.46%          | 0.2           | 0.00%             | 0.97             | 0.03%                 | 0.76                 | 0.72%                      | 0.12                      | 0.06%                  | 0.7                   |
| 546 |                       |                      |                    |                   |                |               |                |               |                   |                  |                       |                      |                            |                           |                        |                       |
| 547 | 0.00%                 | 0.9                  | 0.02%              | 0.81              | 0.26%          | 0.3           | 0.30%          | 0.3           | 0.22%             | 0.38             | 0.02%                 | 0.79                 | 0.00%                      | 0.9                       | 0.40%                  | 0.2                   |
| 548 | 0.34%                 | 0.2                  | 0.08%              | 0.57              | 0.60%          | 0.13          | 0.01%          | 0.8           | 0.04%             | 0.71             | 0.07%                 | 0.65                 | 0.00%                      | 0.9                       | 0.20%                  | 0.4                   |
| 549 | 0.20%                 | 0.4                  | 0.01%              | 0.88              | 0.10%          | 0.6           | 1.15%          | 0.05          | 0.00%             | 0.92             | 0.12%                 | 0.57                 | 0.24%                      | 0.4                       | 0.29%                  | 0.3                   |
| 550 | 0.04%                 | 0.7                  | 0.14%              | 0.48              | 0.00%          | 1             | 0.10%          | 0.6           | 0.05%             | 0.7              | 0.12%                 | 0.56                 | 0.06%                      | 0.6                       | 0.75%                  | 0.11                  |
| 551 | 0.05%                 | 0.7                  | 0.16%              | 0.44              | 0.03%          | 0.8           | 0.11%          | 0.5           | 0.00%             | 1                | 0.12%                 | 0.54                 | 0.06%                      | 0.7                       | 0.29%                  | 0.3                   |
| 552 | 0.20%                 | 0.4                  | 0.09%              | 0.57              | 0.40%          | 0.3           | 0.04%          | 0.7           | 0.09%             | 0.6              | 0.01%                 | 0.86                 | 0.01%                      | 0.8                       | 0.02%                  | 0.8                   |
| 553 | 0.49%                 | 0.2                  | 0.00%              | 0.97              | 0.07%          | 0.6           | 0.00%          | 1             | 0.28%             | 0.33             | 0.09%                 | 0.6                  | 0.19%                      | 0.4                       | 0.01%                  | 0.8                   |
| 554 | 0.22%                 | 0.4                  | 0.09%              | 0.57              | 0.16%          | 0.5           | 0.18%          | 0.4           | 0.79%             | 0.107            | 0.22%                 | 0.42                 | 0.02%                      | 0.8                       | 0.06%                  | 0.7                   |
| 555 | 0.36%                 | 0.3                  | 0.49%              | 0.21              | 0.58%          | 0.2           | 0.01%          | 0.8           | 0.09%             | 0.6              | 0.01%                 | 0.88                 | 0.01%                      | 0.8                       | 0.26%                  | 0.4                   |
| 556 | 0.40%                 | 0.3                  | 0.51%              | 0.2               | 0.60%          | 0.2           | 0.02%          | 0.8           | 0.13%             | 0.54             | 0.01%                 | 0.87                 | 0.01%                      | 0.9                       | 0.25%                  | 0.4                   |
| 557 | 0.05%                 | 0.7                  | 0.25%              | 0.32              | 0.01%          | 0.8           | 0.02%          | 0.8           | 0.03%             | 0.74             | 0.23%                 | 0.38                 | 0.23%                      | 0.3                       | 0.23%                  | 0.3                   |
| 558 | 0.05%                 | 0.7                  | 0.26%              | 0.32              | 0.01%          | 0.8           | 0.02%          | 0.8           | 0.03%             | 0.72             | 0.24%                 | 0.38                 | 0.24%                      | 0.3                       | 0.23%                  | 0.3                   |
| 559 | 0.20%                 | 0.4                  | 0.98%              | 0.068             | 0.27%          | 0.3           | 0.07%          | 0.6           | 0.11%             | 0.57             | 0.07%                 | 0.65                 | 0.09%                      | 0.6                       | 0.42%                  | 0.2                   |
| 560 | 0.46%                 | 0.2                  | 1.32%              | 0.039             | 0.44%          | 0.2           | 0.06%          | 0.7           | 0.05%             | 0.72             | 0.10%                 | 0.61                 | 0.13%                      | 0.5                       | 0.55%                  | 0.2                   |
| 561 | 0.41%                 | 0.2                  | 0.21%              | 0.38              | 0.00%          | 1             | 0.00%          | 1             | 0.11%             | 0.56             | 0.01%                 | 0.85                 | 0.30%                      | 0.3                       | 0.38%                  | 0.3                   |
| 562 | 0.87%                 | 0.09                 | 1.45%              | 0.026             | 2.24%          | 0.007         | 0.44%          | 0.2           | 1.25%             | 0.048            | 0.23%                 | 0.41                 | 0.01%                      | 0.8                       | 0.43%                  | 0.2                   |

|     | A   | B      | C          | D             | E             | F                      | G                | H                | I                      | J                     | K                  | L                 | M              | N             | O                         | P                        |
|-----|-----|--------|------------|---------------|---------------|------------------------|------------------|------------------|------------------------|-----------------------|--------------------|-------------------|----------------|---------------|---------------------------|--------------------------|
| 1   | Chr | Gene   | SNP ID     | Position (bp) | Position (cM) | Minor allele frequency | Hardy-Weinberg P | Reference allele | H2_Prepulse inhibition | P_Prepulse inhibition | H2_P50 suppression | P_P50 suppression | H2_Antisaccade | P_Antisaccade | H2_Continuous performance | P_Continuous performance |
| 563 | 5   | GABRB2 | rs1422951  | 160766838     | 176.64        | 0.28                   | 0.723            | A                | 0.44%                  | 0.25                  | 0.01%              | 0.9               | 0.02%          | 0.79          | 0.13%                     | 0.51                     |
| 564 | 5   | GABRB2 | rs10043074 | 160780542     | 176.65        | 0.13                   | 0.745            | T                | 0.10%                  | 0.57                  | 0.07%              | 0.7               | 0.02%          | 0.8           | 0.10%                     | 0.54                     |
| 565 | 5   | GABRB2 | rs4498288  | 160807099     | 176.67        | 0.02                   | 1.000            | A                | 0.05%                  | 0.69                  | 0.07%              | 0.7               | 0.04%          | 0.7           | 0.04%                     | 0.7                      |
| 566 | 5   | GABRB2 | rs2962420  | 160822562     | 176.69        | 0.37                   | 1.000            | A                | 0.08%                  | 0.62                  | 0.01%              | 0.9               | 0.00%          | 0.99          | 0.04%                     | 0.71                     |
| 567 | 5   | GABRB2 | rs7724146  | 160827209     | 176.69        | 0.17                   | 0.794            | T                | 0.07%                  | 0.66                  | 0.04%              | 0.8               | 0.00%          | 0.91          | 0.51%                     | 0.21                     |
| 568 | 5   | GABRB2 | rs2962406  | 160842679     | 176.70        | 0.26                   | 1.000            | T                | 0.15%                  | 0.5                   | 0.14%              | 0.6               | 0.00%          | 0.9           | 0.02%                     | 0.81                     |
| 569 | 5   | GABRB2 | rs2962402  | 160870827     | 176.73        | 0.02                   | 1.000            | G                | 0.28%                  | 0.34                  | 0.02%              | 0.8               | 0.57%          | 0.16          | 0.00%                     | 0.98                     |
| 570 | 5   | GABRB2 | rs6882041  | 160874978     | 176.73        | 0.28                   | 0.220            | T                | 1.37%                  | 0.042                 | 0.11%              | 0.6               | 0.00%          | 0.94          | 0.03%                     | 0.74                     |
| 571 | 5   | DRD1   | rs5326     | 174802802     | 207.23        | 0.18                   | 0.335            | G                | 0.22%                  | 0.44                  | 0.06%              | 0.7               | 0.13%          | 0.54          | 0.13%                     | 0.52                     |
| 572 | 6   | MUTED  | rs9379157  | 7993105       | 19.48         | 0.06                   | 0.471            | T                | 0.05%                  | 0.71                  | 0.05%              | 0.7               | 0.18%          | 0.44          | 0.17%                     | 0.45                     |
| 573 | 6   | MUTED  | rs2294435  | 8002919       | 19.48         | 0.16                   | 0.791            | A                | 0.03%                  | 0.78                  | 0.00%              | 0.9               | 0.00%          | 0.97          | 0.28%                     | 0.32                     |
| 574 | 6   | MUTED  | rs2815155  | 8010229       | 19.48         | 0.50                   | 0.247            | T                | 0.00%                  | 0.96                  | 0.11%              | 0.6               | 0.17%          | 0.45          | 0.26%                     | 0.34                     |
| 575 | 6   | MUTED  | rs2326975  | 8014321       | 19.48         | 0.07                   | 1.000            | T                | 0.28%                  | 0.37                  | 0.45%              | 0.3               | 0.02%          | 0.82          | 0.04%                     | 0.73                     |
| 576 | 6   | DTNBP1 | rs1047631  | 15631080      | 34.22         | 0.14                   | 0.554            | A                | 0.03%                  | 0.77                  | 0.02%              | 0.8               | 0.00%          | 0.96          | 0.52%                     | 0.2                      |
| 577 | 6   | DTNBP1 | rs742106   | 15632459      | 34.22         | 0.34                   | 0.203            | G                | 0.01%                  | 0.87                  | 0.08%              | 0.7               | 0.46%          | 0.21          | 0.01%                     | 0.89                     |
| 578 | 6   | DTNBP1 | rs875462   | 15646415      | 34.22         | 0.24                   | 0.560            | T                | 0.15%                  | 0.49                  | 0.17%              | 0.5               | 0.12%          | 0.54          | 0.17%                     | 0.46                     |
| 579 | 6   | DTNBP1 | rs1040410  | 15655455      | 34.22         | 0.08                   | 0.348            | C                | 0.44%                  | 0.29                  | 0.50%              | 0.3               | 0.61%          | 0.16          | 0.39%                     | 0.25                     |
| 580 | 6   | DTNBP1 | rs7771339  | 15677985      | 34.22         | 0.05                   | 0.380            | G                | 0.16%                  | 0.49                  | 0.04%              | 0.7               | 0.04%          | 0.71          | 0.06%                     | 0.65                     |
| 581 | 6   | DTNBP1 | rs760666   | 15697100      | 34.22         | 0.23                   | 0.842            | C                | 0.19%                  | 0.43                  | 0.35%              | 0.3               | 0.21%          | 0.41          | 0.25%                     | 0.35                     |
| 582 | 6   | DTNBP1 | rs2619539  | 15728834      | 34.22         | 0.44                   | 0.180            | G                | 0.19%                  | 0.45                  | 0.02%              | 0.8               | 1.77%          | 0.014         | 0.67%                     | 0.122                    |
| 583 | 6   | DTNBP1 | rs3213207  | 15736081      | 34.22         | 0.06                   | 0.100            | A                | 0.29%                  | 0.31                  | 0.89%              | 0.15              | 0.15%          | 0.43          | 0.93%                     | 0.048                    |
| 584 | 6   | DTNBP1 | rs1011313  | 15741411      | 34.22         | 0.11                   | 0.225            | G                | 0.08%                  | 0.63                  | 0.03%              | 0.8               | 0.14%          | 0.45          | 0.00%                     | 0.91                     |
| 585 | 6   | DTNBP1 | rs6459409  | 15744832      | 34.22         | 0.17                   | 1.000            | T                | 0.20%                  | 0.43                  | 0.22%              | 0.4               | 0.96%          | 0.083         | 0.64%                     | 0.135                    |
| 586 | 6   | DTNBP1 | rs2619528  | 15757808      | 34.22         | 0.15                   | 0.257            | G                | 0.53%                  | 0.2                   | 0.57%              | 0.2               | 0.65%          | 0.134         | 1.11%                     | 0.048                    |
| 587 | 6   | DTNBP1 | rs2619522  | 15761628      | 34.22         | 0.15                   | 0.257            | T                | 0.44%                  | 0.24                  | 0.01%              | 0.9               | 0.64%          | 0.132         | 1.09%                     | 0.048                    |
| 588 | 6   | DTNBP1 | rs1018381  | 15765049      | 34.22         | 0.08                   | 0.358            | C                | 0.36%                  | 0.34                  | 0.04%              | 0.7               | 0.37%          | 0.28          | 0.15%                     | 0.49                     |
| 589 | 6   | DTNBP1 | rs1474605  | 15766191      | 34.22         | 0.15                   | 0.388            | A                | 0.45%                  | 0.24                  | 0.04%              | 0.7               | 0.69%          | 0.12          | 1.21%                     | 0.038                    |
| 590 | 6   | DTNBP1 | rs1997679  | 15766884      | 34.22         | 0.32                   | 0.867            | C                | 0.02%                  | 0.82                  | 0.00%              | 0.9               | 0.00%          | 0.94          | 0.02%                     | 0.78                     |
| 591 | 6   | DTNBP1 | rs909706   | 15768850      | 34.22         | 0.38                   | 0.536            | G                | 0.36%                  | 0.28                  | 0.25%              | 0.4               | 0.74%          | 0.099         | 0.09%                     | 0.56                     |
| 592 | 6   | DTNBP1 | rs9476886  | 15769440      | 34.22         | 0.28                   | 0.076            | C                | 1.31%                  | 0.049                 | 0.12%              | 0.5               | 0.03%          | 0.75          | 0.06%                     | 0.65                     |
| 593 | 6   | MOG    | rs29234    | 29732091      | 49.94         | 0.06                   | 0.507            | T                | 0.61%                  | 0.149                 | 0.01%              | 0.9               | 0.17%          | 0.43          | 0.19%                     | 0.41                     |
| 594 | 6   | MOG    | rs2256266  | 29740297      | 49.94         | 0.17                   | 0.034            | C                | 0.70%                  | 0.135                 | 0.12%              | 0.6               | 0.88%          | 0.074         | 0.12%                     | 0.5                      |
| 595 | 6   | MOG    | rs2747419  | 29750173      | 49.94         | 0.04                   | 1.000            | G                | 0.04%                  | 0.73                  | 0.06%              | 0.7               | 0.01%          | 0.89          | 0.00%                     | 0.94                     |

|     | Q                     | R                    | S                  | T                 | U              | V             | W              | X             | Y                 | Z                | AA                    | AB                   | AC                         | AD                        | AE                     | AF                    |
|-----|-----------------------|----------------------|--------------------|-------------------|----------------|---------------|----------------|---------------|-------------------|------------------|-----------------------|----------------------|----------------------------|---------------------------|------------------------|-----------------------|
| 1   | H2_Letter-Number Span | P_Letter-Number Span | H2_Verbal learning | P_Verbal learning | H2_Abstraction | P_Abstraction | H2_Face memory | P_Face memory | H2_Spatial memory | P_Spatial memory | H2_Spatial processing | P_Spatial processing | H2_Sensori-motor dexterity | P_Sensori-motor dexterity | H2_Emotion recognition | P_Emotion recognition |
| 563 | 0.24%                 | 0.3                  | 0.73%              | 0.109             | 0.32%          | 0.3           | 0.17%          | 0.4           | 0.11%             | 0.55             | 0.00%                 | 0.95                 | 0.12%                      | 0.5                       | 0.41%                  | 0.2                   |
| 564 | 0.52%                 | 0.2                  | 0.02%              | 0.8               | 0.52%          | 0.2           | 0.02%          | 0.8           | 0.25%             | 0.36             | 0.37%                 | 0.28                 | 0.16%                      | 0.5                       | 0.00%                  | 1                     |
| 565 | 0.06%                 | 0.6                  | 0.46%              | 0.19              | 0.04%          | 0.7           | 0.08%          | 0.6           | 0.10%             | 0.55             | 0.01%                 | 0.87                 | 0.06%                      | 0.6                       | 0.04%                  | 0.7                   |
| 566 | 0.15%                 | 0.4                  | 1.00%              | 0.056             | 0.33%          | 0.3           | 0.05%          | 0.7           | 0.00%             | 0.91             | 0.19%                 | 0.44                 | 0.17%                      | 0.4                       | 0.77%                  | 0.1                   |
| 567 | 0.58%                 | 0.2                  | 0.04%              | 0.72              | 0.64%          | 0.14          | 0.02%          | 0.8           | 0.10%             | 0.57             | 0.01%                 | 0.87                 | 0.28%                      | 0.3                       | 0.15%                  | 0.5                   |
| 568 | 0.04%                 | 0.7                  | 1.31%              | 0.034             | 0.57%          | 0.2           | 0.02%          | 0.8           | 0.26%             | 0.36             | 0.02%                 | 0.81                 | 0.08%                      | 0.6                       | 0.38%                  | 0.3                   |
| 569 | 0.21%                 | 0.4                  | 0.05%              | 0.65              | 0.22%          | 0.4           | 0.01%          | 0.9           | 0.07%             | 0.62             | 0.04%                 | 0.71                 | 0.45%                      | 0.2                       | 0.74%                  | 0.09                  |
| 570 | 0.05%                 | 0.7                  | 0.52%              | 0.17              | 0.59%          | 0.15          | 0.09%          | 0.6           | 0.79%             | 0.102            | 0.69%                 | 0.146                | 0.11%                      | 0.5                       | 0.23%                  | 0.4                   |
| 571 | 0.03%                 | 0.8                  | 0.46%              | 0.22              | 0.12%          | 0.5           | 0.02%          | 0.8           | 0.12%             | 0.56             | 0.04%                 | 0.73                 | 0.01%                      | 0.9                       | 0.39%                  | 0.3                   |
| 572 | 0.01%                 | 0.8                  | 0.00%              | 1                 | 0.12%          | 0.5           | 0.18%          | 0.4           | 0.00%             | 0.95             | 0.20%                 | 0.41                 | 0.34%                      | 0.3                       | 0.16%                  | 0.5                   |
| 573 | 0.35%                 | 0.2                  | 0.01%              | 0.82              | 0.27%          | 0.3           | 0.82%          | 0.08          | 0.40%             | 0.24             | 0.00%                 | 1                    | 1.08%                      | 0.04                      | 0.01%                  | 0.9                   |
| 574 | 0.21%                 | 0.4                  | 0.05%              | 0.67              | 0.02%          | 0.8           | 0.35%          | 0.3           | 0.43%             | 0.23             | 0.38%                 | 0.27                 | 0.77%                      | 0.1                       | 0.14%                  | 0.5                   |
| 575 | 0.06%                 | 0.7                  | 0.05%              | 0.67              | 0.04%          | 0.7           | 0.03%          | 0.7           | 0.27%             | 0.33             | 0.28%                 | 0.33                 | 0.89%                      | 0.07                      | 0.47%                  | 0.2                   |
| 576 | 0.03%                 | 0.8                  | 0.00%              | 0.97              | 0.00%          | 0.9           | 0.26%          | 0.3           | 0.14%             | 0.52             | 0.04%                 | 0.73                 | 0.30%                      | 0.3                       | 0.00%                  | 0.9                   |
| 577 | 0.79%                 | 0.1                  | 1.02%              | 0.047             | 0.35%          | 0.2           | 0.01%          | 0.9           | 0.29%             | 0.31             | 0.51%                 | 0.19                 | 0.86%                      | 0.08                      | 0.37%                  | 0.2                   |
| 578 | 0.32%                 | 0.3                  | 0.08%              | 0.6               | 0.15%          | 0.5           | 0.00%          | 1             | 0.01%             | 0.89             | 0.90%                 | 0.09                 | 0.04%                      | 0.7                       | 0.03%                  | 0.7                   |
| 579 | 0.49%                 | 0.2                  | 0.06%              | 0.66              | 0.30%          | 0.3           | 0.74%          | 0.1           | 0.37%             | 0.26             | 0.16%                 | 0.48                 | 0.22%                      | 0.4                       | 0.23%                  | 0.4                   |
| 580 | 0.08%                 | 0.6                  | 0.44%              | 0.19              | 0.30%          | 0.3           | 0.28%          | 0.3           | 0.95%             | 0.063            | 0.00%                 | 0.97                 | 0.17%                      | 0.4                       | 0.03%                  | 0.7                   |
| 581 | 0.16%                 | 0.4                  | 0.07%              | 0.61              | 0.40%          | 0.2           | 0.81%          | 0.08          | 0.01%             | 0.89             | 0.80%                 | 0.108                | 0.29%                      | 0.3                       | 0.26%                  | 0.3                   |
| 582 | 0.63%                 | 0.12                 | 0.30%              | 0.28              | 0.01%          | 0.9           | 0.00%          | 1             | 0.16%             | 0.45             | 0.05%                 | 0.67                 | 0.18%                      | 0.4                       | 0.00%                  | 1                     |
| 583 | 0.58%                 | 0.14                 | 0.32%              | 0.22              | 0.24%          | 0.4           | 1.22%          | 0.04          | 0.00%             | 0.93             | 0.00%                 | 0.96                 | 0.01%                      | 0.8                       | 0.01%                  | 0.8                   |
| 584 | 0.12%                 | 0.5                  | 0.16%              | 0.41              | 0.02%          | 0.8           | 0.13%          | 0.5           | 0.45%             | 0.19             | 0.48%                 | 0.2                  | 0.21%                      | 0.4                       | 0.02%                  | 0.8                   |
| 585 | 0.67%                 | 0.09                 | 0.06%              | 0.64              | 0.22%          | 0.3           | 0.00%          | 0.9           | 0.83%             | 0.095            | 0.69%                 | 0.144                | 0.63%                      | 0.15                      | 0.59%                  | 0.2                   |
| 586 | 0.01%                 | 0.8                  | 0.01%              | 0.85              | 0.38%          | 0.2           | 0.03%          | 0.7           | 0.22%             | 0.36             | 0.00%                 | 0.91                 | 0.00%                      | 1                         | 0.01%                  | 0.9                   |
| 587 | 0.50%                 | 0.2                  | 0.04%              | 0.7               | 0.10%          | 0.5           | 0.57%          | 0.14          | 0.25%             | 0.33             | 0.01%                 | 0.88                 | 0.00%                      | 1                         | 0.00%                  | 0.9                   |
| 588 | 0.35%                 | 0.3                  | 0.07%              | 0.62              | 0.43%          | 0.2           | 0.02%          | 0.8           | 0.32%             | 0.3              | 0.00%                 | 1                    | 0.25%                      | 0.3                       | 0.18%                  | 0.4                   |
| 589 | 0.01%                 | 0.9                  | 0.04%              | 0.68              | 0.27%          | 0.3           | 0.00%          | 1             | 0.27%             | 0.31             | 0.00%                 | 0.9                  | 0.21%                      | 0.4                       | 0.12%                  | 0.5                   |
| 590 | 0.18%                 | 0.4                  | 0.02%              | 0.77              | 0.51%          | 0.2           | 0.03%          | 0.7           | 0.23%             | 0.37             | 0.67%                 | 0.138                | 0.00%                      | 1                         | 0.00%                  | 1                     |
| 591 | 0.00%                 | 0.9                  | 0.05%              | 0.65              | 0.21%          | 0.4           | 0.02%          | 0.8           | 0.25%             | 0.33             | 0.06%                 | 0.65                 | 0.23%                      | 0.4                       | 0.00%                  | 0.9                   |
| 592 | 0.08%                 | 0.6                  | 0.21%              | 0.38              | 0.12%          | 0.5           | 0.86%          | 0.08          | 0.00%             | 0.91             | 0.18%                 | 0.45                 | 0.00%                      | 0.9                       | 0.00%                  | 1                     |
| 593 | 0.44%                 | 0.2                  | 0.00%              | 0.97              | 0.29%          | 0.3           | 0.21%          | 0.4           | 0.07%             | 0.62             | 0.13%                 | 0.51                 | 0.18%                      | 0.4                       | 0.18%                  | 0.4                   |
| 594 | 0.14%                 | 0.5                  | 0.70%              | 0.095             | 0.08%          | 0.6           | 0.23%          | 0.3           | 0.01%             | 0.87             | 0.34%                 | 0.28                 | 1.07%                      | 0.05                      | 0.04%                  | 0.7                   |
| 595 | 0.18%                 | 0.4                  | 0.30%              | 0.3               | 0.34%          | 0.3           | 0.00%          | 1             | 0.00%             | 0.96             | 0.10%                 | 0.55                 | 0.26%                      | 0.3                       | 0.16%                  | 0.4                   |

|     | A   | B      | C          | D             | E             | F                      | G                | H                | I                      | J                     | K                  | L                 | M              | N             | O                         | P                        |
|-----|-----|--------|------------|---------------|---------------|------------------------|------------------|------------------|------------------------|-----------------------|--------------------|-------------------|----------------|---------------|---------------------------|--------------------------|
| 1   | Chr | Gene   | SNP ID     | Position (bp) | Position (cM) | Minor allele frequency | Hardy-Weinberg P | Reference allele | H2_Prepulse inhibition | P_Prepulse inhibition | H2_P50 suppression | P_P50 suppression | H2_Antisaccade | P_Antisaccade | H2_Continuous performance | P_Continuous performance |
| 596 | 6   | NOTCH4 | rs204991   | 32269344      | 50.82         | 0.17                   | 0.622            | T                | 0.04%                  | 0.74                  | 0.12%              | 0.6               | 0.00%          | 0.96          | 0.34%                     | 0.29                     |
| 597 | 6   | NOTCH4 | rs379464   | 32294326      | 50.82         | 0.06                   | 0.509            | C                | 0.82%                  | 0.134                 | 0.00%              | 1                 | 0.49%          | 0.22          | 0.18%                     | 0.43                     |
| 598 | 6   | NOTCH4 | rs422951   | 32296361      | 50.82         | 0.38                   | 0.444            | A                | 0.02%                  | 0.82                  | 0.28%              | 1                 | 0.05%          | 0.69          | 0.07%                     | 0.61                     |
| 599 | 6   | NOTCH4 | rs520692   | 32296618      | 50.82         | 0.29                   | 0.372            | A                | 0.00%                  | 0.95                  | 0.34%              | 0.3               | 0.08%          | 0.61          | 0.00%                     | 0.96                     |
| 600 | 6   | NOTCH4 | rs2071282  | 32296921      |               | 0.00                   | 1.000            |                  |                        |                       |                    |                   |                |               |                           |                          |
| 601 | 6   | NOTCH4 | rs915894   | 32298368      | 50.82         | 0.34                   | 0.873            | A                | 0.12%                  | 0.57                  | 0.00%              | 0.9               | 1.11%          | 0.066         | 0.27%                     | 0.34                     |
| 602 | 6   | NOTCH4 | rs3134931  | 32298598      | 50.82         | 0.32                   | 0.623            | T                | 0.01%                  | 0.86                  | 0.04%              | 0.7               | 0.00%          | 0.95          | 0.63%                     | 0.15                     |
| 603 | 6   | NOTCH4 | rs532385   | 32303337      | 50.83         | 0.20                   | 0.005            | G                | 0.15%                  | 0.47                  | 0.06%              | 0.7               | 0.22%          | 0.37          | 0.00%                     | 0.95                     |
| 604 | 6   | GRM4   | rs7762948  | 34094069      | 53.09         | 0.07                   | 0.179            | C                | 0.03%                  | 0.77                  | 0.00%              | 0.9               | 1.14%          | 0.037         | 0.16%                     | 0.43                     |
| 605 | 6   | GRM4   | rs2229901  | 34098425      | 53.11         | 0.23                   | 0.038            | A                | 0.11%                  | 0.54                  | 0.11%              | 0.5               | 0.19%          | 0.4           | 0.30%                     | 0.29                     |
| 606 | 6   | GRM4   | rs2451383  | 34113047      | 53.19         | 0.30                   | 0.380            | A                | 0.19%                  | 0.45                  | 0.30%              | 0.4               | 0.03%          | 0.74          | 0.25%                     | 0.37                     |
| 607 | 6   | GRM4   | rs9469690  | 34120889      | 53.23         | 0.22                   | 1.000            | C                | 0.00%                  | 1                     | 0.09%              | 0.6               | 0.00%          | 0.92          | 0.06%                     | 0.66                     |
| 608 | 6   | GRM4   | rs3778068  | 34136383      | 53.31         | 0.37                   | 0.640            | G                | 0.17%                  | 0.48                  | 0.01%              | 0.9               | 0.46%          | 0.23          | 0.04%                     | 0.72                     |
| 609 | 6   | GRM4   | rs1906953  | 34144424      | 53.35         | 0.18                   | 0.206            | C                | 0.75%                  | 0.149                 | 0.05%              | 0.7               | 0.22%          | 0.39          | 0.02%                     | 0.8                      |
| 610 | 6   | GRM4   | rs1565364  | 34156504      | 53.35         | 0.26                   | 0.850            | C                | 0.96%                  | 0.093                 | 0.29%              | 0.4               | 0.06%          | 0.64          | 0.09%                     | 0.57                     |
| 611 | 6   | GRM4   | rs1873249  | 34161402      | 53.35         | 0.47                   | 0.309            | A                | 1.26%                  | 0.048                 | 0.01%              | 0.9               | 0.00%          | 0.92          | 0.00%                     | 0.91                     |
| 612 | 6   | GRM4   | rs874631   | 34170783      | 53.35         | 0.08                   | 1.000            | C                | 0.21%                  | 0.45                  | 0.70%              | 0.2               | 0.09%          | 0.6           | 1.19%                     | 0.045                    |
| 613 | 6   | GRM4   | rs2499713  | 34171329      | 53.35         | 0.03                   | 1.000            | C                | 0.48%                  | 0.2                   | 0.04%              | 0.7               | 0.29%          | 0.31          | 0.66%                     | 0.116                    |
| 614 | 6   | GRM4   | rs733457   | 34176386      | 53.35         | 0.39                   | 0.281            | T                | 0.00%                  | 0.95                  | 0.87%              | 0.14              | 0.51%          | 0.18          | 0.22%                     | 0.38                     |
| 615 | 6   | GRM4   | rs747373   | 34188002      | 53.35         | 0.04                   | 0.220            | G                | 0.07%                  | 0.65                  | 2.03%              | 0.03              | 0.00%          | 0.95          | 0.11%                     | 0.52                     |
| 616 | 6   | GRM4   | rs2499722  | 34191437      | 53.35         | 0.44                   | 0.553            | T                | 0.32%                  | 0.33                  | 0.27%              | 0.4               | 0.22%          | 0.41          | 0.00%                     | 0.93                     |
| 617 | 6   | GRM4   | rs937031   | 34193665      | 53.35         | 0.04                   | 0.220            | C                | 0.30%                  | 0.37                  | 0.21%              | 0.5               | 0.06%          | 0.66          | 1.58%                     | 0.029                    |
| 618 | 6   | HTR1B  | rs6296     | 78228979      | 97.84         | 0.24                   | 0.842            | G                | 1.96%                  | 0.015                 | 0.06%              | 0.7               | 1.33%          | 0.035         | 0.26%                     | 0.36                     |
| 619 | 6   | TAAR6  | rs8192624  | 132933946     | 149.17        | 0.07                   | 0.604            | G                | 0.78%                  | 0.139                 | 0.25%              | 0.4               | 0.66%          | 0.15          | 3.22%                     | 0.00106                  |
| 620 | 6   | TAAR6  | rs8192625  | 132934025     | 149.17        | 0.07                   | 0.604            | G                | 0.15%                  | 0.52                  | 0.24%              | 0.4               | 0.15%          | 0.48          | 1.22%                     | 0.041                    |
| 621 | 6   | TAAR6  | rs7772821  | 132934199     | 149.17        | 0.21                   | 0.003            | T                | 0.18%                  | 0.45                  | 0.01%              | 0.9               | 0.03%          | 0.73          | 0.33%                     | 0.27                     |
| 622 | 6   | TAAR6  | rs4305745  | 132935405     | 149.17        | 0.49                   | 0.247            | G                | 0.02%                  | 0.82                  | 0.02%              | 0.8               | 0.01%          | 0.87          | 0.04%                     | 0.71                     |
| 623 | 6   | TAAR6  | rs6903874  | 132938603     | 149.17        | 0.21                   | 0.825            | T                | 1.12%                  | 0.084                 | 0.51%              | 0.3               | 0.01%          | 0.86          | 0.05%                     | 0.69                     |
| 624 | 6   | GRM1   | rs12216492 | 146418311     | 164.41        | 0.08                   | 0.616            | T                | 0.00%                  | 0.95                  | 1.23%              | 0.07              | 0.15%          | 0.49          | 0.07%                     | 0.61                     |
| 625 | 6   | GRM1   | rs4896857  | 146488865     | 164.41        | 0.09                   | 0.672            | A                | 0.03%                  | 0.78                  | 0.01%              | 0.8               | 0.13%          | 0.51          | 0.03%                     | 0.75                     |
| 626 | 6   | GRM1   | rs4607452  | 146529796     | 164.41        | 0.15                   | 0.167            | G                | 0.00%                  | 0.99                  | 0.01%              | 0.9               | 0.21%          | 0.37          | 0.05%                     | 0.65                     |
| 627 | 6   | GRM1   | rs4895691  | 146564647     | 164.41        | 0.04                   | 0.189            | G                | 0.42%                  | 0.26                  | 0.17%              | 0.4               | 0.36%          | 0.26          | 0.02%                     | 0.79                     |
| 628 | 6   | GRM1   | rs7750079  | 146643446     | 164.50        | 0.07                   | 0.066            | G                | 0.03%                  | 0.76                  | 0.00%              | 0.9               | 0.03%          | 0.78          | 0.00%                     | 0.95                     |

|     | Q                     | R                    | S                  | T                 | U              | V             | W              | X             | Y                 | Z                | AA                    | AB                   | AC                         | AD                        | AE                     | AF                    |
|-----|-----------------------|----------------------|--------------------|-------------------|----------------|---------------|----------------|---------------|-------------------|------------------|-----------------------|----------------------|----------------------------|---------------------------|------------------------|-----------------------|
| 1   | H2_Letter-Number Span | P_Letter-Number Span | H2_Verbal learning | P_Verbal learning | H2_Abstraction | P_Abstraction | H2_Face memory | P_Face memory | H2_Spatial memory | P_Spatial memory | H2_Spatial processing | P_Spatial processing | H2_Sensori-motor dexterity | P_Sensori-motor dexterity | H2_Emotion recognition | P_Emotion recognition |
| 596 | 0.02%                 | 0.8                  | 0.48%              | 0.19              | 0.41%          | 0.2           | 0.46%          | 0.2           | 0.31%             | 0.33             | 0.61%                 | 0.19                 | 1.24%                      | 0.05                      | 0.88%                  | 0.1                   |
| 597 | 0.08%                 | 0.6                  | 0.02%              | 0.81              | 0.18%          | 0.4           | 0.02%          | 0.8           | 0.24%             | 0.37             | 0.15%                 | 0.49                 | 0.07%                      | 0.6                       | 0.46%                  | 0.2                   |
| 598 | 0.07%                 | 0.6                  | 0.38%              | 0.22              | 0.00%          | 1             | 0.60%          | 0.09          | 0.17%             | 0.43             | 0.05%                 | 0.68                 | 0.02%                      | 0.8                       | 0.15%                  | 0.5                   |
| 599 | 0.04%                 | 0.7                  | 0.02%              | 0.81              | 0.05%          | 0.7           | 0.41%          | 0.2           | 0.01%             | 0.88             | 0.35%                 | 0.29                 | 0.39%                      | 0.2                       | 0.12%                  | 0.5                   |
| 600 |                       |                      |                    |                   |                |               |                |               |                   |                  |                       |                      |                            |                           |                        |                       |
| 601 | 0.23%                 | 0.4                  | 0.00%              | 0.93              | 0.06%          | 0.6           | 0.23%          | 0.3           | 0.24%             | 0.4              | 0.02%                 | 0.83                 | 0.21%                      | 0.3                       | 0.01%                  | 0.8                   |
| 602 | 0.01%                 | 0.9                  | 0.79%              | 0.099             | 0.03%          | 0.8           | 0.01%          | 0.8           | 0.30%             | 0.33             | 0.30%                 | 0.35                 | 0.02%                      | 0.8                       | 0.24%                  | 0.4                   |
| 603 | 0.03%                 | 0.7                  | 0.05%              | 0.66              | 0.31%          | 0.3           | 0.00%          | 1             | 0.00%             | 0.93             | 0.00%                 | 0.94                 | 0.07%                      | 0.6                       | 0.77%                  | 0.09                  |
| 604 | 0.15%                 | 0.4                  | 0.24%              | 0.33              | 0.31%          | 0.3           | 0.18%          | 0.4           | 0.42%             | 0.23             | 0.13%                 | 0.52                 | 0.06%                      | 0.6                       | 0.75%                  | 0.1                   |
| 605 | 0.13%                 | 0.5                  | 0.73%              | 0.085             | 0.43%          | 0.2           | 0.94%          | 0.05          | 0.78%             | 0.09             | 2.13%                 | 0.0073               | 0.06%                      | 0.6                       | 3.42%                  | 0.0003                |
| 606 | 0.00%                 | 1                    | 1.00%              | 0.058             | 1.16%          | 0.04          | 1.26%          | 0.03          | 1.37%             | 0.034            | 3.00%                 | 0.0026               | 0.02%                      | 0.8                       | 2.36%                  | 0.005                 |
| 607 | 0.01%                 | 0.8                  | 1.02%              | 0.056             | 1.13%          | 0.05          | 0.21%          | 0.4           | 0.60%             | 0.17             | 1.64%                 | 0.025                | 0.00%                      | 1                         | 2.12%                  | 0.008                 |
| 608 | 0.68%                 | 0.13                 | 0.23%              | 0.37              | 0.92%          | 0.08          | 0.39%          | 0.2           | 0.36%             | 0.28             | 0.62%                 | 0.17                 | 0.02%                      | 0.8                       | 0.32%                  | 0.3                   |
| 609 | 0.07%                 | 0.6                  | 0.58%              | 0.141             | 0.01%          | 0.8           | 0.48%          | 0.2           | 0.45%             | 0.22             | 1.47%                 | 0.032                | 0.06%                      | 0.7                       | 0.43%                  | 0.2                   |
| 610 | 0.16%                 | 0.4                  | 1.23%              | 0.033             | 0.11%          | 0.5           | 0.03%          | 0.7           | 0.72%             | 0.117            | 2.25%                 | 0.0083               | 0.07%                      | 0.6                       | 0.04%                  | 0.7                   |
| 611 | 0.63%                 | 0.13                 | 0.86%              | 0.076             | 0.91%          | 0.07          | 0.06%          | 0.6           | 0.00%             | 0.95             | 0.37%                 | 0.29                 | 0.12%                      | 0.5                       | 0.02%                  | 0.8                   |
| 612 | 0.26%                 | 0.3                  | 0.00%              | 0.92              | 0.26%          | 0.3           | 0.05%          | 0.7           | 0.19%             | 0.41             | 0.22%                 | 0.4                  | 0.89%                      | 0.08                      | 0.17%                  | 0.4                   |
| 613 | 1.17%                 | 0.04                 | 0.00%              | 0.94              | 0.00%          | 0.9           | 0.29%          | 0.3           | 0.00%             | 0.95             | 0.45%                 | 0.22                 | 0.50%                      | 0.2                       | 0.68%                  | 0.12                  |
| 614 | 0.96%                 | 0.05                 | 0.06%              | 0.64              | 1.30%          | 0.03          | 0.04%          | 0.7           | 0.25%             | 0.35             | 0.56%                 | 0.18                 | 0.69%                      | 0.13                      | 0.00%                  | 0.9                   |
| 615 | 0.33%                 | 0.3                  | 0.14%              | 0.47              | 0.68%          | 0.11          | 0.01%          | 0.8           | 0.00%             | 0.98             | 0.42%                 | 0.29                 | 0.10%                      | 0.6                       | 0.10%                  | 0.6                   |
| 616 | 0.18%                 | 0.4                  | 0.20%              | 0.41              | 0.93%          | 0.07          | 0.00%          | 0.9           | 0.27%             | 0.34             | 0.00%                 | 0.9                  | 0.01%                      | 0.9                       | 0.02%                  | 0.8                   |
| 617 | 0.02%                 | 0.8                  | 0.55%              | 0.18              | 0.89%          | 0.09          | 0.14%          | 0.5           | 0.03%             | 0.74             | 0.81%                 | 0.11                 | 0.17%                      | 0.4                       | 0.41%                  | 0.2                   |
| 618 | 0.42%                 | 0.2                  | 0.08%              | 0.6               | 0.48%          | 0.2           | 0.36%          | 0.3           | 0.15%             | 0.49             | 0.25%                 | 0.38                 | 0.02%                      | 0.8                       | 0.59%                  | 0.2                   |
| 619 | 0.13%                 | 0.5                  | 0.03%              | 0.74              | 0.19%          | 0.4           | 0.40%          | 0.2           | 1.15%             | 0.053            | 0.03%                 | 0.76                 | 0.02%                      | 0.8                       | 0.00%                  | 0.9                   |
| 620 | 0.03%                 | 0.7                  | 0.05%              | 0.66              | 0.00%          | 1             | 0.31%          | 0.3           | 1.25%             | 0.041            | 0.02%                 | 0.8                  | 0.38%                      | 0.2                       | 0.19%                  | 0.4                   |
| 621 | 0.44%                 | 0.2                  | 0.18%              | 0.4               | 0.09%          | 0.6           | 0.07%          | 0.6           | 0.08%             | 0.59             | 0.04%                 | 0.73                 | 0.62%                      | 0.15                      | 0.34%                  | 0.3                   |
| 622 | 0.44%                 | 0.2                  | 0.18%              | 0.42              | 0.04%          | 0.7           | 0.23%          | 0.3           | 0.18%             | 0.44             | 0.02%                 | 0.82                 | 0.12%                      | 0.5                       | 0.06%                  | 0.6                   |
| 623 | 0.49%                 | 0.2                  | 0.07%              | 0.63              | 0.04%          | 0.7           | 0.71%          | 0.13          | 0.19%             | 0.45             | 0.01%                 | 0.84                 | 1.91%                      | 0.02                      | 0.11%                  | 0.6                   |
| 624 | 0.67%                 | 0.11                 | 0.43%              | 0.2               | 0.29%          | 0.3           | 0.36%          | 0.2           | 1.77%             | 0.0134           | 0.89%                 | 0.093                | 0.19%                      | 0.4                       | 1.35%                  | 0.03                  |
| 625 | 0.40%                 | 0.2                  | 0.89%              | 0.063             | 0.16%          | 0.4           | 0.24%          | 0.3           | 0.03%             | 0.75             | 0.05%                 | 0.7                  | 0.39%                      | 0.2                       | 0.15%                  | 0.5                   |
| 626 | 0.60%                 | 0.12                 | 0.28%              | 0.28              | 0.15%          | 0.5           | 0.02%          | 0.8           | 0.04%             | 0.7              | 0.31%                 | 0.3                  | 0.11%                      | 0.5                       | 0.50%                  | 0.2                   |
| 627 | 0.14%                 | 0.4                  | 0.00%              | 0.91              | 0.00%          | 1             | 0.51%          | 0.2           | 0.84%             | 0.078            | 0.00%                 | 0.92                 | 0.02%                      | 0.8                       | 0.26%                  | 0.3                   |
| 628 | 0.25%                 | 0.3                  | 0.02%              | 0.82              | 0.00%          | 1             | 0.08%          | 0.6           | 0.00%             | 0.98             | 0.44%                 | 0.27                 | 0.09%                      | 0.6                       | 0.53%                  | 0.2                   |

|     | A   | B    | C          | D             | E             | F                      | G                | H                | I                      | J                     | K                  | L                 | M              | N             | O                         | P                        |
|-----|-----|------|------------|---------------|---------------|------------------------|------------------|------------------|------------------------|-----------------------|--------------------|-------------------|----------------|---------------|---------------------------|--------------------------|
| 1   | Chr | Gene | SNP ID     | Position (bp) | Position (cM) | Minor allele frequency | Hardy-Weinberg P | Reference allele | H2_Prepulse inhibition | P_Prepulse inhibition | H2_P50 suppression | P_P50 suppression | H2_Antisaccade | P_Antisaccade | H2_Continuous performance | P_Continuous performance |
| 629 | 6   | GRM1 | rs362956   | 146668721     | 164.53        | 0.01                   | 1.000            | A                | 0.02%                  | 0.78                  | 1.42%              | 0.04              | 0.18%          | 0.44          | 1.59%                     | 0.0068                   |
| 630 | 6   | GRM1 | rs941901   | 146698944     | 164.57        | 0.27                   | 0.009            | C                | 0.17%                  | 0.45                  | 0.62%              | 0.2               | 0.03%          | 0.75          | 0.06%                     | 0.62                     |
| 631 | 6   | GRM1 | rs362862   | 146702961     |               | 0.00                   | 1.000            |                  |                        |                       |                    |                   |                |               |                           |                          |
| 632 | 6   | GRM1 | rs1983635  | 146707365     | 164.59        | 0.24                   | 0.076            | T                | 0.16%                  | 0.47                  | 0.62%              | 0.2               | 0.94%          | 0.08          | 0.11%                     | 0.54                     |
| 633 | 6   | GRM1 | rs362836   | 146708451     | 164.59        | 0.20                   | 0.014            | T                | 0.00%                  | 0.96                  | 0.28%              | 0.4               | 0.15%          | 0.48          | 0.16%                     | 0.46                     |
| 634 | 6   | GRM1 | rs61914    | 146717958     | 164.60        | 0.41                   | 0.549            | T                | 0.46%                  | 0.23                  | 0.00%              | 1                 | 0.03%          | 0.74          | 0.03%                     | 0.75                     |
| 635 | 6   | GRM1 | rs362895   | 146721019     | 164.60        | 0.21                   | 0.512            | C                | 1.64%                  | 0.028                 | 0.41%              | 0.3               | 0.49%          | 0.21          | 0.41%                     | 0.26                     |
| 636 | 6   | GRM1 | rs362848   | 146724178     | 164.61        | 0.09                   | 0.222            | A                | 0.11%                  | 0.56                  | 0.06%              | 0.7               | 0.86%          | 0.086         | 0.24%                     | 0.34                     |
| 637 | 6   | GRM1 | rs9403775  | 146728202     | 164.61        | 0.16                   | 0.784            | A                | 1.16%                  | 0.066                 | 0.37%              | 0.3               | 0.10%          | 0.56          | 0.02%                     | 0.79                     |
| 638 | 6   | GRM1 | rs2300620  | 146745874     | 164.64        | 0.24                   | 0.045            | T                | 0.36%                  | 0.29                  | 0.04%              | 0.7               | 0.00%          | 0.94          | 0.28%                     | 0.3                      |
| 639 | 6   | GRM1 | rs362925   | 146757695     | 164.65        | 0.02                   | 1.000            | G                | 1.33%                  | 0.083                 | 0.83%              | 0.13              | 0.08%          | 0.61          | 0.10%                     | 0.58                     |
| 640 | 6   | GRM1 | rs362854   | 146758161     | 164.66        | 0.50                   | 0.773            | A                | 0.47%                  | 0.21                  | 0.55%              | 0.2               | 0.61%          | 0.147         | 0.02%                     | 0.8                      |
| 641 | 6   | GRM1 | rs362936   | 146762519     | 164.66        | 0.01                   | 1.000            | G                | 0.01%                  | 0.86                  | 0.43%              | 0.3               | 0.10%          | 0.67          | 0.64%                     | 0.16                     |
| 642 | 6   | GRM1 | rs979775   | 146767662     | 164.67        | 0.10                   | 1.000            | G                | 0.24%                  | 0.39                  | 0.25%              | 0.4               | 0.00%          | 0.92          | 0.19%                     | 0.4                      |
| 643 | 6   | GRM1 | rs7755078  | 146768262     | 164.67        | 0.34                   | 0.253            | C                | 1.02%                  | 0.085                 | 0.61%              | 0.2               | 0.03%          | 0.77          | 0.03%                     | 0.75                     |
| 644 | 6   | GRM1 | rs2300626  | 146771510     | 164.67        | 0.08                   | 0.077            | A                | 0.10%                  | 0.59                  | 0.31%              | 0.3               | 0.01%          | 0.82          | 0.78%                     | 0.087                    |
| 645 | 6   | GRM1 | rs3804295  | 146781896     | 164.69        | 0.48                   | 0.385            | G                | 0.72%                  | 0.133                 | 0.11%              | 0.6               | 0.05%          | 0.7           | 0.00%                     | 0.96                     |
| 646 | 6   | GRM1 | rs2284796  | 146788588     | 164.70        | 0.06                   | 0.035            | A                | 0.06%                  | 0.67                  | 0.07%              | 0.6               | 0.08%          | 0.6           | 0.24%                     | 0.35                     |
| 647 | 6   | GRM1 | rs2941     | 146796825     | 164.71        | 0.01                   | 1.000            | G                | 0.37%                  | 0.4                   | 0.11%              | 0.6               | 0.17%          | 0.49          | 0.00%                     | 1                        |
| 648 | 6   | GRM1 | rs7770466  | 146800958     | 164.71        | 0.04                   | 1.000            | A                | 0.18%                  | 0.46                  | 0.08%              | 0.7               | 0.05%          | 0.69          | 0.22%                     | 0.39                     |
| 649 | 6   | ESR1 | rs488133   | 152167137     | 174.20        | 0.32                   | 0.620            | C                | 0.12%                  | 0.54                  | 0.00%              | 0.9               | 0.00%          | 0.97          | 0.60%                     | 0.16                     |
| 650 | 6   | ESR1 | rs532010   | 152172611     | 174.22        | 0.41                   | 1.000            | T                | 0.02%                  | 0.79                  | 0.00%              | 0.9               | 0.29%          | 0.33          | 0.20%                     | 0.42                     |
| 651 | 6   | ESR1 | rs11155813 | 152191128     | 174.26        | 0.12                   | 0.728            | T                | 0.48%                  | 0.22                  | 0.36%              | 0.3               | 0.45%          | 0.23          | 0.01%                     | 0.9                      |
| 652 | 6   | ESR1 | rs9479130  | 152210149     | 174.31        | 0.46                   | 0.145            | A                | 0.20%                  | 0.46                  | 0.69%              | 0.2               | 0.01%          | 0.86          | 0.10%                     | 0.57                     |
| 653 | 6   | ESR1 | rs1709182  | 152217050     | 174.33        | 0.36                   | 0.275            | T                | 0.13%                  | 0.55                  | 0.03%              | 0.8               | 0.01%          | 0.89          | 0.36%                     | 0.29                     |
| 654 | 6   | ESR1 | rs9340820  | 152217518     | 174.33        | 0.03                   | 1.000            | T                | 0.12%                  | 0.61                  | 0.04%              | 0.7               | 0.12%          | 0.53          | 0.03%                     | 0.74                     |
| 655 | 6   | ESR1 | rs1709183  | 152235689     | 174.37        | 0.25                   | 0.552            | A                | 0.31%                  | 0.36                  | 0.06%              | 0.7               | 0.00%          | 0.99          | 0.11%                     | 0.56                     |
| 656 | 6   | ESR1 | rs9340835  | 152241624     | 174.39        | 0.37                   | 0.062            | G                | 0.04%                  | 0.75                  | 0.00%              | 1                 | 0.09%          | 0.6           | 0.19%                     | 0.44                     |
| 657 | 6   | ESR1 | rs6557170  | 152244797     | 174.40        | 0.20                   | 0.169            | G                | 0.36%                  | 0.31                  | 0.01%              | 0.9               | 0.04%          | 0.73          | 0.18%                     | 0.44                     |
| 658 | 6   | ESR1 | rs7761846  | 152254201     | 174.42        | 0.11                   | 0.038            | T                | 0.01%                  | 0.85                  | 0.20%              | 0.4               | 0.06%          | 0.65          | 0.11%                     | 0.52                     |
| 659 | 6   | ESR1 | rs4870062  | 152279311     | 174.48        | 0.31                   | 0.732            | T                | 0.32%                  | 0.35                  | 0.10%              | 0.6               | 0.13%          | 0.54          | 0.00%                     | 0.92                     |
| 660 | 6   | ESR1 | rs3020377  | 152314091     | 174.57        | 0.35                   | 0.750            | A                | 0.11%                  | 0.57                  | 0.26%              | 0.4               | 0.07%          | 0.63          | 0.34%                     | 0.29                     |
| 661 | 6   | ESR1 | rs3020317  | 152320434     | 174.58        | 0.18                   | 0.457            | T                | 0.01%                  | 0.87                  | 0.30%              | 0.4               | 0.07%          | 0.64          | 0.25%                     | 0.36                     |

|     | Q                     | R                    | S                  | T                 | U              | V             | W              | X             | Y                 | Z                | AA                    | AB                   | AC                         | AD                        | AE                     | AF                    |
|-----|-----------------------|----------------------|--------------------|-------------------|----------------|---------------|----------------|---------------|-------------------|------------------|-----------------------|----------------------|----------------------------|---------------------------|------------------------|-----------------------|
| 1   | H2_Letter-Number Span | P_Letter-Number Span | H2_Verbal learning | P_Verbal learning | H2_Abstraction | P_Abstraction | H2_Face memory | P_Face memory | H2_Spatial memory | P_Spatial memory | H2_Spatial processing | P_Spatial processing | H2_Sensori-motor dexterity | P_Sensori-motor dexterity | H2_Emotion recognition | P_Emotion recognition |
| 629 | 0.14%                 | 0.4                  | 0.26%              | 0.27              | 0.04%          | 0.6           | 0.25%          | 0.3           | 0.93%             | 0.036            | 0.01%                 | 0.82                 | 0.17%                      | 0.4                       | 0.00%                  | 1                     |
| 630 | 0.00%                 | 1                    | 0.03%              | 0.73              | 0.15%          | 0.4           | 0.04%          | 0.7           | 0.98%             | 0.054            | 0.10%                 | 0.56                 | 0.07%                      | 0.6                       | 0.03%                  | 0.7                   |
| 631 |                       |                      |                    |                   |                |               |                |               |                   |                  |                       |                      |                            |                           |                        |                       |
| 632 | 0.04%                 | 0.7                  | 0.54%              | 0.16              | 2.05%          | 0.007         | 0.44%          | 0.2           | 0.43%             | 0.23             | 2.33%                 | 0.0095               | 0.02%                      | 0.8                       | 1.62%                  | 0.02                  |
| 633 | 0.15%                 | 0.5                  | 0.00%              | 0.96              | 0.28%          | 0.3           | 0.19%          | 0.4           | 0.02%             | 0.78             | 0.43%                 | 0.26                 | 0.47%                      | 0.2                       | 0.97%                  | 0.07                  |
| 634 | 0.26%                 | 0.3                  | 0.81%              | 0.081             | 0.74%          | 0.1           | 0.82%          | 0.09          | 2.22%             | 0.006            | 2.62%                 | 0.0038               | 1.89%                      | 0.011                     | 2.03%                  | 0.008                 |
| 635 | 0.27%                 | 0.3                  | 0.36%              | 0.26              | 1.26%          | 0.03          | 0.26%          | 0.3           | 1.07%             | 0.056            | 2.00%                 | 0.0141               | 0.92%                      | 0.08                      | 0.55%                  | 0.2                   |
| 636 | 0.01%                 | 0.8                  | 0.76%              | 0.083             | 0.60%          | 0.13          | 0.07%          | 0.6           | 1.59%             | 0.016            | 0.39%                 | 0.24                 | 0.42%                      | 0.2                       | 0.32%                  | 0.3                   |
| 637 | 0.02%                 | 0.8                  | 1.40%              | 0.024             | 0.05%          | 0.7           | 1.16%          | 0.04          | 1.34%             | 0.035            | 1.08%                 | 0.064                | 1.18%                      | 0.04                      | 0.01%                  | 0.9                   |
| 638 | 0.18%                 | 0.4                  | 0.09%              | 0.55              | 0.07%          | 0.6           | 0.21%          | 0.4           | 0.35%             | 0.26             | 0.08%                 | 0.59                 | 0.74%                      | 0.09                      | 0.08%                  | 0.6                   |
| 639 | 0.01%                 | 0.8                  | 0.33%              | 0.3               | 0.06%          | 0.7           | 0.01%          | 0.9           | 0.13%             | 0.53             | 0.34%                 | 0.3                  | 0.77%                      | 0.11                      | 0.28%                  | 0.3                   |
| 640 | 0.16%                 | 0.4                  | 0.68%              | 0.102             | 1.12%          | 0.04          | 1.91%          | 0.007         | 3.34%             | 0.00065          | 3.27%                 | 0.00135              | 2.69%                      | 0.002                     | 1.44%                  | 0.02                  |
| 641 | 0.48%                 | 0.2                  | 3.15%              | 0.00107           | 0.07%          | 0.6           | 1.36%          | 0.04          | 0.22%             | 0.4              | 0.30%                 | 0.38                 | 0.15%                      | 0.5                       | 0.27%                  | 0.4                   |
| 642 | 0.06%                 | 0.6                  | 1.22%              | 0.032             | 0.49%          | 0.2           | 0.12%          | 0.5           | 0.21%             | 0.41             | 0.38%                 | 0.29                 | 0.34%                      | 0.3                       | 1.40%                  | 0.03                  |
| 643 | 0.05%                 | 0.7                  | 0.00%              | 0.91              | 0.26%          | 0.4           | 0.85%          | 0.08          | 0.84%             | 0.099            | 0.37%                 | 0.3                  | 0.16%                      | 0.5                       | 0.29%                  | 0.3                   |
| 644 | 0.06%                 | 0.6                  | 0.52%              | 0.148             | 0.21%          | 0.4           | 0.33%          | 0.2           | 0.81%             | 0.087            | 0.93%                 | 0.075                | 0.08%                      | 0.6                       | 1.18%                  | 0.03                  |
| 645 | 0.03%                 | 0.7                  | 0.06%              | 0.62              | 0.55%          | 0.2           | 0.23%          | 0.4           | 1.40%             | 0.03             | 0.10%                 | 0.58                 | 1.59%                      | 0.02                      | 0.90%                  | 0.08                  |
| 646 | 0.04%                 | 0.7                  | 0.05%              | 0.67              | 0.09%          | 0.6           | 0.41%          | 0.2           | 0.11%             | 0.54             | 0.19%                 | 0.44                 | 0.07%                      | 0.6                       | 0.34%                  | 0.3                   |
| 647 | 0.07%                 | 0.6                  | 0.58%              | 0.21              | 0.10%          | 0.6           | 0.47%          | 0.2           | 0.24%             | 0.43             | 0.09%                 | 0.65                 | 0.22%                      | 0.4                       | 0.91%                  | 0.08                  |
| 648 | 0.00%                 | 0.9                  | 0.82%              | 0.087             | 0.64%          | 0.14          | 0.45%          | 0.2           | 0.38%             | 0.27             | 0.57%                 | 0.18                 | 0.12%                      | 0.6                       | 0.07%                  | 0.7                   |
| 649 | 0.07%                 | 0.6                  | 0.05%              | 0.68              | 0.15%          | 0.5           | 0.00%          | 1             | 0.43%             | 0.24             | 0.00%                 | 0.96                 | 0.03%                      | 0.7                       | 0.05%                  | 0.7                   |
| 650 | 0.48%                 | 0.2                  | 0.18%              | 0.42              | 0.38%          | 0.3           | 0.17%          | 0.5           | 0.07%             | 0.63             | 0.01%                 | 0.88                 | 0.00%                      | 1                         | 0.00%                  | 1                     |
| 651 | 0.39%                 | 0.2                  | 0.48%              | 0.19              | 0.42%          | 0.2           | 0.52%          | 0.2           | 0.10%             | 0.57             | 0.02%                 | 0.8                  | 0.00%                      | 0.9                       | 0.06%                  | 0.7                   |
| 652 | 0.97%                 | 0.08                 | 0.52%              | 0.19              | 0.35%          | 0.3           | 0.07%          | 0.7           | 0.20%             | 0.45             | 1.62%                 | 0.035                | 0.23%                      | 0.4                       | 0.02%                  | 0.8                   |
| 653 | 1.37%                 | 0.04                 | 0.25%              | 0.37              | 2.12%          | 0.011         | 0.22%          | 0.4           | 1.04%             | 0.079            | 0.57%                 | 0.21                 | 0.05%                      | 0.7                       | 0.06%                  | 0.7                   |
| 654 | 0.07%                 | 0.6                  | 0.00%              | 0.95              | 0.31%          | 0.3           | 0.48%          | 0.2           | 0.03%             | 0.76             | 0.22%                 | 0.39                 | 0.13%                      | 0.5                       | 0.17%                  | 0.4                   |
| 655 | 0.03%                 | 0.7                  | 0.02%              | 0.82              | 0.01%          | 0.9           | 0.11%          | 0.6           | 0.34%             | 0.3              | 0.03%                 | 0.78                 | 0.25%                      | 0.4                       | 0.01%                  | 0.8                   |
| 656 | 0.62%                 | 0.2                  | 0.48%              | 0.2               | 1.65%          | 0.02          | 0.04%          | 0.7           | 0.53%             | 0.2              | 0.15%                 | 0.51                 | 0.26%                      | 0.4                       | 0.03%                  | 0.7                   |
| 657 | 0.05%                 | 0.7                  | 0.30%              | 0.3               | 0.01%          | 0.9           | 0.19%          | 0.4           | 0.12%             | 0.53             | 0.24%                 | 0.38                 | 0.01%                      | 0.9                       | 0.03%                  | 0.7                   |
| 658 | 0.41%                 | 0.2                  | 0.25%              | 0.32              | 0.01%          | 0.9           | 0.08%          | 0.6           | 0.65%             | 0.128            | 0.26%                 | 0.35                 | 1.04%                      | 0.05                      | 0.19%                  | 0.4                   |
| 659 | 0.08%                 | 0.6                  | 0.05%              | 0.69              | 0.01%          | 0.9           | 0.14%          | 0.5           | 1.73%             | 0.022            | 0.92%                 | 0.107                | 0.81%                      | 0.11                      | 0.00%                  | 1                     |
| 660 | 0.05%                 | 0.7                  | 0.62%              | 0.131             | 0.52%          | 0.2           | 0.06%          | 0.6           | 0.42%             | 0.24             | 0.28%                 | 0.36                 | 0.46%                      | 0.2                       | 0.08%                  | 0.6                   |
| 661 | 0.00%                 | 0.9                  | 0.84%              | 0.083             | 0.00%          | 0.9           | 0.37%          | 0.3           | 1.64%             | 0.021            | 2.82%                 | 0.0036               | 0.02%                      | 0.8                       | 0.36%                  | 0.3                   |



|     | A   | B     | C          | D             | E             | F                      | G                | H                | I                      | J                     | K                  | L                 | M              | N             | O                         | P                        |
|-----|-----|-------|------------|---------------|---------------|------------------------|------------------|------------------|------------------------|-----------------------|--------------------|-------------------|----------------|---------------|---------------------------|--------------------------|
| 1   | Chr | Gene  | SNP ID     | Position (bp) | Position (cM) | Minor allele frequency | Hardy-Weinberg P | Reference allele | H2_Prepulse inhibition | P_Prepulse inhibition | H2_P50 suppression | P_P50 suppression | H2_Antisaccade | P_Antisaccade | H2_Continuous performance | P_Continuous performance |
| 662 | 6   | ESR1  | rs1884051  | 152324972     | 174.59        | 0.33                   | 0.742            | A                | 0.49%                  | 0.23                  | 0.22%              | 0.5               | 0.08%          | 0.62          | 0.40%                     | 0.25                     |
| 663 | 6   | ESR1  | rs985694   | 152328318     | 174.60        | 0.16                   | 1.000            | C                | 0.11%                  | 0.56                  | 0.43%              | 0.3               | 0.40%          | 0.25          | 0.23%                     | 0.37                     |
| 664 | 6   | ESR1  | rs1884052  | 152333059     | 174.61        | 0.15                   | 0.772            | C                | 0.17%                  | 0.47                  | 0.07%              | 0.7               | 0.54%          | 0.18          | 0.28%                     | 0.32                     |
| 665 | 6   | ESR1  | rs1884054  | 152333259     | 174.61        | 0.38                   | 0.064            | A                | 0.28%                  | 0.36                  | 0.10%              | 0.6               | 0.16%          | 0.46          | 0.37%                     | 0.26                     |
| 666 | 6   | ESR1  | rs7757956  | 152358833     | 174.68        | 0.15                   | 0.774            | T                | 0.07%                  | 0.66                  | 0.14%              | 0.6               | 0.42%          | 0.24          | 0.41%                     | 0.24                     |
| 667 | 6   | ESR1  | rs9340949  | 152360403     | 174.68        | 0.01                   | 1.000            | G                | 0.02%                  | 0.82                  | 1.02%              | 0.14              | 0.78%          | 0.136         | 0.12%                     | 0.55                     |
| 668 | 6   | ESR1  | rs9340954  | 152361865     | 174.68        | 0.29                   | 1.000            | T                | 0.06%                  | 0.69                  | 0.25%              | 0.4               | 0.29%          | 0.35          | 1.18%                     | 0.052                    |
| 669 | 6   | ESR1  | rs3020368  | 152412883     | 174.72        | 0.09                   | 0.635            | C                | 0.01%                  | 0.88                  | 1.10%              | 0.11              | 0.21%          | 0.43          | 0.00%                     | 0.93                     |
| 670 | 6   | ESR1  | rs7764672  | 152434661     |               | 0.00                   | 1.000            |                  |                        |                       |                    |                   |                |               |                           |                          |
| 671 | 6   | ESR1  | rs13192678 | 152447603     | 174.72        | 0.12                   | 0.268            | C                | 0.33%                  | 0.34                  | 0.30%              | 0.4               | 0.07%          | 0.63          | 0.73%                     | 0.121                    |
| 672 | 6   | ESR1  | rs3778090  | 152449721     | 174.72        | 0.09                   | 1.000            | C                | 0.18%                  | 0.48                  | 0.10%              | 0.6               | 0.53%          | 0.2           | 0.07%                     | 0.64                     |
| 673 | 6   | ESR1  | rs2474148  | 152454597     | 174.72        | 0.28                   | 0.469            | G                | 0.00%                  | 0.98                  | 0.07%              | 0.7               | 0.00%          | 0.94          | 0.10%                     | 0.57                     |
| 674 | 6   | ESR1  | rs1543403  | 152470397     | 174.72        | 0.44                   | 0.882            | C                | 0.00%                  | 0.99                  | 0.08%              | 0.6               | 0.77%          | 0.107         | 0.29%                     | 0.3                      |
| 675 | 7   | SP4   | rs2073535  | 21432682      |               | 0.00                   | 1.000            |                  |                        |                       |                    |                   |                |               |                           |                          |
| 676 | 7   | SP4   | rs2282888  | 21442657      | 35.53         | 0.34                   | 0.748            | A                | 0.00%                  | 0.94                  | 0.19%              | 0.5               | 0.72%          | 0.13          | 0.66%                     | 0.14                     |
| 677 | 7   | SP4   | rs10233357 | 21456570      | 35.54         | 0.07                   | 0.004            | C                | 0.78%                  | 0.094                 | 0.06%              | 0.6               | 0.17%          | 0.39          | 0.18%                     | 0.4                      |
| 678 | 7   | SP4   | rs4722032  | 21458066      | 35.54         | 0.05                   | 0.341            | C                | 0.46%                  | 0.25                  | 0.08%              | 0.6               | 0.19%          | 0.42          | 0.25%                     | 0.36                     |
| 679 | 7   | SP4   | rs3807643  | 21476387      | 35.56         | 0.03                   | 1.000            | A                | 0.15%                  | 0.52                  | 0.00%              | 1                 | 0.06%          | 0.65          | 0.01%                     | 0.81                     |
| 680 | 7   | SP4   | rs2282896  | 21479247      | 35.56         | 0.05                   | 0.043            | G                | 0.98%                  | 0.076                 | 0.00%              | 1                 | 0.19%          | 0.37          | 0.45%                     | 0.2                      |
| 681 | 7   | SP4   | rs6943809  | 21484906      | 35.57         | 0.23                   | 1.000            | A                | 0.23%                  | 0.39                  | 0.39%              | 0.3               | 0.02%          | 0.78          | 1.86%                     | 0.0109                   |
| 682 | 7   | SP4   | rs1011168  | 21496283      | 35.58         | 0.29                   | 0.492            | A                | 0.01%                  | 0.9                   | 0.13%              | 0.5               | 0.09%          | 0.58          | 0.09%                     | 0.59                     |
| 683 | 7   | SP4   | rs3807641  | 21496629      | 35.58         | 0.06                   | 0.504            | T                | 0.58%                  | 0.18                  | 0.21%              | 0.5               | 0.35%          | 0.26          | 0.55%                     | 0.16                     |
| 684 | 7   | SP4   | rs12668354 | 21498416      | 35.58         | 0.29                   | 0.056            | A                | 0.06%                  | 0.67                  | 0.18%              | 0.5               | 1.14%          | 0.051         | 0.30%                     | 0.31                     |
| 685 | 7   | SP4   | rs12673091 | 21504592      | 35.59         | 0.32                   | 1.000            | A                | 0.10%                  | 0.59                  | 0.11%              | 0.6               | 0.18%          | 0.44          | 1.31%                     | 0.034                    |
| 686 | 7   | SP4   | rs1018954  | 21516416      | 35.60         | 0.40                   | 0.288            | T                | 0.11%                  | 0.56                  | 0.08%              | 0.7               | 0.22%          | 0.39          | 0.15%                     | 0.47                     |
| 687 | 7   | SP4   | rs11974306 | 21523887      | 35.61         | 0.46                   | 0.563            | A                | 0.09%                  | 0.6                   | 0.01%              | 0.9               | 0.24%          | 0.38          | 0.72%                     | 0.113                    |
| 688 | 7   | CRHR2 | rs2240403  | 30661727      | 48.44         | 0.11                   | 0.700            | C                | 0.38%                  | 0.26                  | 0.07%              | 0.6               | 0.29%          | 0.3           | 0.58%                     | 0.15                     |
| 689 | 7   | CRHR2 | rs2190242  | 30676000      | 48.47         | 0.28                   | 0.583            | A                | 0.36%                  | 0.28                  | 0.07%              | 0.7               | 0.00%          | 0.92          | 0.07%                     | 0.62                     |
| 690 | 7   | CRHR2 | rs2284217  | 30680133      | 48.47         | 0.26                   | 1.000            | G                | 0.10%                  | 0.6                   | 0.19%              | 0.5               | 0.46%          | 0.23          | 1.30%                     | 0.044                    |
| 691 | 7   | CRHR2 | rs2267717  | 30683568      | 48.48         | 0.16                   | 0.411            | G                | 0.02%                  | 0.81                  | 0.21%              | 0.5               | 0.04%          | 0.74          | 0.94%                     | 0.084                    |
| 692 | 7   | CRHR2 | rs4723002  | 30692226      | 48.50         | 0.13                   | 1.000            | A                | 0.01%                  | 0.87                  | 0.06%              | 0.7               | 0.14%          | 0.47          | 0.32%                     | 0.27                     |
| 693 | 7   | GRM3  | rs2073549  | 86111520      | 100.21        | 0.02                   | 1.000            | A                | 0.48%                  | 0.22                  | 0.00%              | 0.9               | 0.33%          | 0.29          | 0.08%                     | 0.6                      |
| 694 | 7   | GRM3  | rs701332   | 86115570      | 100.21        | 0.17                   | 0.609            | T                | 0.18%                  | 0.45                  | 1.36%              | 0.07              | 1.11%          | 0.053         | 0.08%                     | 0.6                      |

|     | Q                     | R                    | S                  | T                 | U              | V             | W              | X             | Y                 | Z                | AA                    | AB                   | AC                         | AD                        | AE                     | AF                    |
|-----|-----------------------|----------------------|--------------------|-------------------|----------------|---------------|----------------|---------------|-------------------|------------------|-----------------------|----------------------|----------------------------|---------------------------|------------------------|-----------------------|
| 1   | H2_Letter-Number Span | P_Letter-Number Span | H2_Verbal learning | P_Verbal learning | H2_Abstraction | P_Abstraction | H2_Face memory | P_Face memory | H2_Spatial memory | P_Spatial memory | H2_Spatial processing | P_Spatial processing | H2_Sensori-motor dexterity | P_Sensori-motor dexterity | H2_Emotion recognition | P_Emotion recognition |
| 662 | 0.02%                 | 0.8                  | 0.00%              | 0.9               | 0.84%          | 0.09          | 0.00%          | 0.9           | 0.32%             | 0.3              | 0.31%                 | 0.33                 | 0.20%                      | 0.4                       | 0.00%                  | 1                     |
| 663 | 0.19%                 | 0.4                  | 0.11%              | 0.52              | 0.00%          | 0.9           | 0.10%          | 0.6           | 0.42%             | 0.23             | 2.12%                 | 0.0098               | 0.00%                      | 1                         | 0.21%                  | 0.4                   |
| 664 | 0.06%                 | 0.6                  | 0.19%              | 0.41              | 0.02%          | 0.8           | 0.09%          | 0.6           | 0.92%             | 0.08             | 3.09%                 | 0.0017               | 1.03%                      | 0.06                      | 0.00%                  | 0.9                   |
| 665 | 0.13%                 | 0.5                  | 0.00%              | 0.93              | 0.07%          | 0.6           | 0.07%          | 0.6           | 0.11%             | 0.54             | 0.52%                 | 0.21                 | 0.01%                      | 0.8                       | 0.19%                  | 0.4                   |
| 666 | 0.00%                 | 0.9                  | 0.38%              | 0.24              | 0.03%          | 0.7           | 0.22%          | 0.4           | 0.05%             | 0.7              | 0.00%                 | 0.91                 | 0.03%                      | 0.7                       | 0.20%                  | 0.4                   |
| 667 | 0.14%                 | 0.6                  | 0.44%              | 0.26              | 0.00%          | 1             | 0.05%          | 0.7           | 0.28%             | 0.33             | 0.17%                 | 0.44                 | 0.02%                      | 0.8                       | 0.01%                  | 0.8                   |
| 668 | 0.30%                 | 0.3                  | 0.10%              | 0.55              | 0.15%          | 0.5           | 0.00%          | 0.9           | 0.01%             | 0.87             | 0.51%                 | 0.21                 | 0.56%                      | 0.2                       | 0.03%                  | 0.8                   |
| 669 | 0.07%                 | 0.6                  | 0.01%              | 0.87              | 0.01%          | 0.8           | 0.03%          | 0.8           | 0.07%             | 0.63             | 0.00%                 | 0.98                 | 0.05%                      | 0.7                       | 0.28%                  | 0.3                   |
| 670 |                       |                      |                    |                   |                |               |                |               |                   |                  |                       |                      |                            |                           |                        |                       |
| 671 | 0.12%                 | 0.5                  | 0.00%              | 0.95              | 0.14%          | 0.5           | 0.01%          | 0.8           | 0.02%             | 0.78             | 0.96%                 | 0.078                | 0.24%                      | 0.4                       | 0.39%                  | 0.3                   |
| 672 | 0.44%                 | 0.2                  | 0.13%              | 0.49              | 0.18%          | 0.4           | 0.03%          | 0.8           | 0.30%             | 0.31             | 1.74%                 | 0.018                | 0.89%                      | 0.08                      | 0.62%                  | 0.14                  |
| 673 | 0.22%                 | 0.4                  | 0.08%              | 0.62              | 0.06%          | 0.6           | 0.12%          | 0.5           | 0.12%             | 0.55             | 0.27%                 | 0.37                 | 1.46%                      | 0.02                      | 0.20%                  | 0.4                   |
| 674 | 0.01%                 | 0.8                  | 0.06%              | 0.64              | 0.02%          | 0.8           | 2.02%          | 0.007         | 0.15%             | 0.48             | 0.97%                 | 0.079                | 0.00%                      | 0.9                       | 0.67%                  | 0.13                  |
| 675 |                       |                      |                    |                   |                |               |                |               |                   |                  |                       |                      |                            |                           |                        |                       |
| 676 | 0.16%                 | 0.5                  | 0.05%              | 0.69              | 1.45%          | 0.03          | 0.06%          | 0.7           | 0.16%             | 0.46             | 1.34%                 | 0.042                | 0.32%                      | 0.3                       | 0.01%                  | 0.9                   |
| 677 | 1.45%                 | 0.013                | 0.13%              | 0.46              | 0.05%          | 0.7           | 0.21%          | 0.4           | 0.35%             | 0.25             | 0.01%                 | 0.87                 | 0.01%                      | 0.9                       | 0.19%                  | 0.4                   |
| 678 | 0.03%                 | 0.7                  | 0.21%              | 0.36              | 0.20%          | 0.4           | 0.04%          | 0.7           | 0.05%             | 0.67             | 0.00%                 | 0.95                 | 0.03%                      | 0.8                       | 0.98%                  | 0.06                  |
| 679 | 0.94%                 | 0.06                 | 0.00%              | 0.91              | 0.00%          | 1             | 0.00%          | 0.9           | 0.20%             | 0.38             | 0.01%                 | 0.84                 | 0.05%                      | 0.7                       | 0.01%                  | 0.9                   |
| 680 | 1.90%                 | 0.006                | 0.36%              | 0.23              | 0.03%          | 0.8           | 1.06%          | 0.06          | 0.18%             | 0.45             | 0.06%                 | 0.69                 | 0.14%                      | 0.5                       | 0.28%                  | 0.3                   |
| 681 | 0.28%                 | 0.3                  | 0.01%              | 0.88              | 0.01%          | 0.9           | 0.14%          | 0.5           | 0.25%             | 0.36             | 0.27%                 | 0.36                 | 0.01%                      | 0.8                       | 0.00%                  | 1                     |
| 682 | 0.02%                 | 0.8                  | 0.01%              | 0.86              | 0.01%          | 0.9           | 0.55%          | 0.2           | 0.11%             | 0.54             | 0.32%                 | 0.31                 | 0.59%                      | 0.2                       | 0.02%                  | 0.8                   |
| 683 | 2.18%                 | 0.004                | 0.14%              | 0.46              | 0.43%          | 0.2           | 0.07%          | 0.6           | 0.42%             | 0.25             | 0.16%                 | 0.49                 | 0.18%                      | 0.4                       | 0.75%                  | 0.12                  |
| 684 | 0.14%                 | 0.5                  | 0.19%              | 0.4               | 2.29%          | 0.005         | 0.06%          | 0.7           | 0.21%             | 0.4              | 2.13%                 | 0.0093               | 0.28%                      | 0.3                       | 0.01%                  | 0.8                   |
| 685 | 0.08%                 | 0.6                  | 0.04%              | 0.71              | 0.02%          | 0.8           | 0.02%          | 0.8           | 0.01%             | 0.82             | 0.25%                 | 0.38                 | 0.23%                      | 0.4                       | 0.03%                  | 0.7                   |
| 686 | 0.01%                 | 0.9                  | 0.23%              | 0.36              | 0.70%          | 0.12          | 0.00%          | 1             | 0.12%             | 0.52             | 0.22%                 | 0.41                 | 0.14%                      | 0.5                       | 0.18%                  | 0.4                   |
| 687 | 0.02%                 | 0.8                  | 0.01%              | 0.88              | 1.23%          | 0.04          | 0.02%          | 0.8           | 0.01%             | 0.86             | 0.17%                 | 0.47                 | 0.01%                      | 0.9                       | 0.36%                  | 0.3                   |
| 688 | 0.01%                 | 0.8                  | 0.03%              | 0.73              | 0.01%          | 0.9           | 0.15%          | 0.5           | 0.03%             | 0.74             | 0.10%                 | 0.59                 | 0.08%                      | 0.6                       | 0.03%                  | 0.7                   |
| 689 | 0.03%                 | 0.7                  | 0.08%              | 0.58              | 0.01%          | 0.9           | 0.04%          | 0.7           | 0.06%             | 0.64             | 0.32%                 | 0.3                  | 0.01%                      | 0.8                       | 0.04%                  | 0.7                   |
| 690 | 0.33%                 | 0.3                  | 0.00%              | 0.93              | 0.03%          | 0.7           | 0.05%          | 0.7           | 0.61%             | 0.15             | 0.10%                 | 0.59                 | 0.10%                      | 0.6                       | 0.16%                  | 0.5                   |
| 691 | 0.36%                 | 0.3                  | 0.00%              | 0.99              | 0.00%          | 0.9           | 0.09%          | 0.6           | 0.05%             | 0.68             | 1.07%                 | 0.075                | 0.14%                      | 0.5                       | 0.34%                  | 0.3                   |
| 692 | 0.04%                 | 0.7                  | 0.24%              | 0.33              | 0.01%          | 0.8           | 0.01%          | 0.9           | 0.08%             | 0.57             | 0.05%                 | 0.67                 | 0.04%                      | 0.7                       | 0.09%                  | 0.6                   |
| 693 | 0.04%                 | 0.7                  | 0.09%              | 0.56              | 0.43%          | 0.2           | 0.01%          | 0.9           | 0.00%             | 0.91             | 0.19%                 | 0.45                 | 0.34%                      | 0.3                       | 0.01%                  | 0.9                   |
| 694 | 0.13%                 | 0.5                  | 0.35%              | 0.25              | 0.52%          | 0.2           | 0.54%          | 0.2           | 0.16%             | 0.45             | 0.22%                 | 0.4                  | 0.90%                      | 0.07                      | 0.40%                  | 0.2                   |

|     | A   | B    | C          | D             | E             | F                      | G                | H                | I                      | J                     | K                  | L                 | M              | N             | O                         | P                        |
|-----|-----|------|------------|---------------|---------------|------------------------|------------------|------------------|------------------------|-----------------------|--------------------|-------------------|----------------|---------------|---------------------------|--------------------------|
| 1   | Chr | Gene | SNP ID     | Position (bp) | Position (cM) | Minor allele frequency | Hardy-Weinberg P | Reference allele | H2_Prepulse inhibition | P_Prepulse inhibition | H2_P50 suppression | P_P50 suppression | H2_Antisaccade | P_Antisaccade | H2_Continuous performance | P_Continuous performance |
| 695 | 7   | GRM3 | rs274614   | 86116023      | 100.21        | 0.33                   | 1.000            | A                | 0.05%                  | 0.71                  | 0.09%              | 0.6               | 0.45%          | 0.23          | 0.01%                     | 0.86                     |
| 696 | 7   | GRM3 | rs724224   | 86163556      | 100.22        | 0.48                   | 0.246            | C                | 0.39%                  | 0.28                  | 0.35%              | 0.3               | 0.39%          | 0.26          | 0.03%                     | 0.75                     |
| 697 | 7   | GRM3 | rs1527765  | 86173887      | 100.22        | 0.11                   | 0.266            | T                | 0.22%                  | 0.42                  | 0.99%              | 0.14              | 0.10%          | 0.57          | 0.10%                     | 0.57                     |
| 698 | 7   | GRM3 | rs2189816  | 86179382      | 100.22        | 0.16                   | 1.000            | T                | 0.00%                  | 0.93                  | 0.11%              | 0.6               | 0.03%          | 0.76          | 0.05%                     | 0.69                     |
| 699 | 7   | GRM3 | rs2237548  | 86198886      | 100.22        | 0.27                   | 0.360            | A                | 0.05%                  | 0.68                  | 0.33%              | 0.3               | 0.46%          | 0.2           | 0.13%                     | 0.49                     |
| 700 | 7   | GRM3 | rs6943659  | 86233862      | 100.23        | 0.29                   | 0.480            | T                | 0.15%                  | 0.49                  | 0.06%              | 0.7               | 0.17%          | 0.44          | 0.12%                     | 0.5                      |
| 701 | 7   | GRM3 | rs2282965  | 86239740      | 100.23        | 0.27                   | 0.065            | T                | 0.15%                  | 0.5                   | 0.17%              | 0.5               | 0.19%          | 0.42          | 0.05%                     | 0.68                     |
| 702 | 7   | GRM3 | rs6465084  | 86241411      | 100.23        | 0.19                   | 0.240            | A                | 0.39%                  | 0.28                  | 0.42%              | 0.3               | 0.03%          | 0.77          | 0.44%                     | 0.21                     |
| 703 | 7   | GRM3 | rs10487052 | 86248625      | 100.23        | 0.19                   | 0.240            | C                | 0.51%                  | 0.22                  | 0.62%              | 0.2               | 0.02%          | 0.78          | 0.49%                     | 0.19                     |
| 704 | 7   | GRM3 | rs2237562  | 86260168      | 100.23        | 0.25                   | 0.560            | T                | 0.00%                  | 0.9                   | 0.12%              | 0.6               | 0.00%          | 0.96          | 0.00%                     | 0.91                     |
| 705 | 7   | GRM3 | rs1468412  | 86271387      | 100.23        | 0.25                   | 0.843            | A                | 0.01%                  | 0.89                  | 0.14%              | 0.5               | 0.00%          | 0.97          | 0.00%                     | 0.93                     |
| 706 | 7   | GRM3 | rs2299227  | 86289908      | 100.23        | 0.02                   | 1.000            | G                | 0.06%                  | 0.65                  | 0.00%              | 0.9               | 0.63%          | 0.128         | 0.13%                     | 0.48                     |
| 707 | 7   | GRM3 | rs10952891 | 86305187      | 100.23        | 0.12                   | 0.720            | G                | 0.09%                  | 0.62                  | 0.54%              | 0.2               | 0.14%          | 0.51          | 0.17%                     | 0.45                     |
| 708 | 7   | GRM3 | rs10487055 | 86333978      | 100.44        | 0.06                   | 1.000            | T                | 0.00%                  | 0.96                  | 6.23%              | 0.0002            | 0.11%          | 0.54          | 0.19%                     | 0.4                      |
| 709 | 7   | RELN | rs737373   | 102902878     | 113.94        | 0.13                   | 0.486            | T                | 0.10%                  | 0.6                   | 0.38%              | 0.2               | 1.66%          | 0.033         | 0.52%                     | 0.21                     |
| 710 | 7   | RELN | rs736707   | 102917639     | 113.94        | 0.20                   | 0.642            | T                | 0.62%                  | 0.19                  | 0.60%              | 0.2               | 0.44%          | 0.26          | 0.04%                     | 0.72                     |
| 711 | 7   | RELN | rs2528856  | 102930031     | 113.94        | 0.29                   | 0.858            | T                | 0.72%                  | 0.16                  | 0.16%              | 0.5               | 0.08%          | 0.65          | 0.10%                     | 0.59                     |
| 712 | 7   | RELN | rs2528858  | 102938847     | 113.94        | 0.05                   | 0.343            | A                | 0.33%                  | 0.31                  | 1.17%              | 0.09              | 0.98%          | 0.078         | 0.59%                     | 0.16                     |
| 713 | 7   | RELN | rs2075039  | 102949958     | 113.94        | 0.05                   | 0.097            | A                | 0.13%                  | 0.54                  | 0.86%              | 0.11              | 1.71%          | 0.029         | 0.05%                     | 0.69                     |
| 714 | 7   | RELN | rs2256504  | 102953131     | 113.94        | 0.14                   | 0.751            | T                | 0.10%                  | 0.61                  | 0.78%              | 0.2               | 0.37%          | 0.3           | 0.01%                     | 0.89                     |
| 715 | 7   | RELN | rs2237622  | 102957006     | 113.94        | 0.17                   | 0.805            | T                | 0.07%                  | 0.63                  | 0.04%              | 0.7               | 0.19%          | 0.43          | 0.06%                     | 0.64                     |
| 716 | 7   | RELN | rs10487160 | 102962491     | 113.94        | 0.09                   | 0.625            | T                | 0.00%                  | 0.98                  | 0.12%              | 0.6               | 0.04%          | 0.73          | 0.10%                     | 0.58                     |
| 717 | 7   | RELN | rs1008126  | 102962680     | 113.94        | 0.32                   | 0.413            | A                | 0.00%                  | 0.99                  | 0.33%              | 0.3               | 0.01%          | 0.87          | 0.04%                     | 0.72                     |
| 718 | 7   | RELN | rs362754   | 102969462     | 113.94        | 0.04                   | 1.000            | T                | 0.44%                  | 0.3                   | 0.20%              | 0.5               | 0.24%          | 0.4           | 0.66%                     | 0.16                     |
| 719 | 7   | RELN | rs362719   | 102973113     | 113.94        | 0.21                   | 0.514            | C                | 0.18%                  | 0.46                  | 0.03%              | 0.8               | 0.40%          | 0.25          | 0.00%                     | 0.99                     |
| 720 | 7   | RELN | rs362777   | 102977433     | 113.94        | 0.13                   | 0.519            | T                | 0.02%                  | 0.82                  | 0.44%              | 0.3               | 0.38%          | 0.24          | 0.19%                     | 0.41                     |
| 721 | 7   | RELN | rs362721   | 102978664     | 113.94        | 0.49                   | 0.564            | T                | 0.24%                  | 0.42                  | 0.01%              | 0.9               | 0.03%          | 0.75          | 0.00%                     | 0.9                      |
| 722 | 7   | RELN | rs2247776  | 102986955     | 113.94        | 0.14                   | 0.556            | A                | 0.83%                  | 0.115                 | 0.00%              | 1                 | 0.27%          | 0.33          | 0.01%                     | 0.86                     |
| 723 | 7   | RELN | rs2229860  | 102993063     | 113.94        | 0.01                   | 1.000            | C                | 1.79%                  | 0.037                 | 0.11%              | 0.6               | 0.12%          | 0.52          | 0.16%                     | 0.41                     |
| 724 | 7   | RELN | rs123712   | 103018526     | 113.94        | 0.28                   | 1.000            | A                | 0.05%                  | 0.71                  | 0.17%              | 0.5               | 1.31%          | 0.045         | 3.05%                     | 0.0015                   |
| 725 | 7   | RELN | rs362685   | 103034019     | 113.94        | 0.04                   | 1.000            | A                | 0.11%                  | 0.55                  | 0.06%              | 0.7               | 0.10%          | 0.54          | 0.05%                     | 0.65                     |
| 726 | 7   | RELN | rs977639   | 103047145     | 113.94        | 0.14                   | 1.000            | C                | 0.00%                  | 0.95                  | 0.09%              | 0.6               | 0.02%          | 0.81          | 0.18%                     | 0.44                     |
| 727 | 7   | RELN | rs362698   | 103064528     | 113.94        | 0.18                   | 0.212            | T                | 0.00%                  | 0.99                  | 0.38%              | 0.3               | 0.20%          | 0.44          | 0.06%                     | 0.65                     |

|     | Q                     | R                    | S                  | T                 | U              | V             | W              | X             | Y                 | Z                | AA                    | AB                   | AC                         | AD                        | AE                     | AF                    |
|-----|-----------------------|----------------------|--------------------|-------------------|----------------|---------------|----------------|---------------|-------------------|------------------|-----------------------|----------------------|----------------------------|---------------------------|------------------------|-----------------------|
| 1   | H2_Letter-Number Span | P_Letter-Number Span | H2_Verbal learning | P_Verbal learning | H2_Abstraction | P_Abstraction | H2_Face memory | P_Face memory | H2_Spatial memory | P_Spatial memory | H2_Spatial processing | P_Spatial processing | H2_Sensori-motor dexterity | P_Sensori-motor dexterity | H2_Emotion recognition | P_Emotion recognition |
| 695 | 0.59%                 | 0.15                 | 0.09%              | 0.58              | 0.25%          | 0.4           | 0.29%          | 0.3           | 0.53%             | 0.19             | 0.03%                 | 0.76                 | 0.54%                      | 0.2                       | 1.06%                  | 0.06                  |
| 696 | 0.20%                 | 0.4                  | 0.00%              | 0.96              | 0.06%          | 0.7           | 0.00%          | 0.9           | 0.11%             | 0.53             | 0.09%                 | 0.6                  | 0.15%                      | 0.5                       | 0.32%                  | 0.3                   |
| 697 | 0.00%                 | 0.9                  | 0.02%              | 0.82              | 0.04%          | 0.7           | 0.51%          | 0.2           | 0.23%             | 0.39             | 0.45%                 | 0.23                 | 0.27%                      | 0.3                       | 0.24%                  | 0.4                   |
| 698 | 0.03%                 | 0.7                  | 0.15%              | 0.46              | 0.47%          | 0.2           | 0.19%          | 0.4           | 0.80%             | 0.105            | 0.90%                 | 0.099                | 0.32%                      | 0.3                       | 0.61%                  | 0.2                   |
| 699 | 0.06%                 | 0.6                  | 0.11%              | 0.52              | 0.29%          | 0.3           | 0.05%          | 0.7           | 0.01%             | 0.87             | 0.00%                 | 0.93                 | 0.08%                      | 0.6                       | 0.11%                  | 0.5                   |
| 700 | 0.03%                 | 0.7                  | 0.00%              | 0.95              | 0.09%          | 0.6           | 0.02%          | 0.8           | 0.01%             | 0.86             | 0.02%                 | 0.8                  | 0.00%                      | 0.9                       | 0.35%                  | 0.3                   |
| 701 | 0.03%                 | 0.7                  | 0.02%              | 0.76              | 0.03%          | 0.7           | 0.00%          | 1             | 0.25%             | 0.35             | 0.03%                 | 0.75                 | 0.13%                      | 0.5                       | 0.58%                  | 0.15                  |
| 702 | 0.33%                 | 0.3                  | 0.36%              | 0.25              | 0.06%          | 0.6           | 0.02%          | 0.8           | 0.24%             | 0.36             | 0.41%                 | 0.25                 | 0.00%                      | 0.9                       | 0.65%                  | 0.13                  |
| 703 | 0.29%                 | 0.3                  | 0.28%              | 0.31              | 0.10%          | 0.5           | 0.03%          | 0.7           | 0.18%             | 0.42             | 0.37%                 | 0.27                 | 0.00%                      | 0.9                       | 0.80%                  | 0.09                  |
| 704 | 0.02%                 | 0.8                  | 0.02%              | 0.77              | 0.20%          | 0.4           | 0.18%          | 0.4           | 0.02%             | 0.78             | 0.26%                 | 0.37                 | 0.25%                      | 0.4                       | 0.04%                  | 0.7                   |
| 705 | 0.03%                 | 0.8                  | 0.02%              | 0.78              | 0.20%          | 0.4           | 0.18%          | 0.4           | 0.02%             | 0.78             | 0.32%                 | 0.33                 | 0.22%                      | 0.4                       | 0.04%                  | 0.7                   |
| 706 | 0.05%                 | 0.6                  | 0.08%              | 0.58              | 0.17%          | 0.4           | 0.01%          | 0.9           | 0.00%             | 0.94             | 0.05%                 | 0.68                 | 0.12%                      | 0.5                       | 0.00%                  | 1                     |
| 707 | 0.05%                 | 0.7                  | 0.36%              | 0.26              | 0.12%          | 0.5           | 0.18%          | 0.4           | 0.08%             | 0.61             | 1.02%                 | 0.077                | 1.10%                      | 0.05                      | 0.00%                  | 1                     |
| 708 | 0.01%                 | 0.9                  | 0.86%              | 0.069             | 0.02%          | 0.8           | 0.03%          | 0.7           | 0.04%             | 0.7              | 0.44%                 | 0.23                 | 1.29%                      | 0.03                      | 0.29%                  | 0.3                   |
| 709 | 0.01%                 | 0.8                  | 0.06%              | 0.66              | 0.11%          | 0.5           | 0.04%          | 0.7           | 0.07%             | 0.63             | 0.10%                 | 0.59                 | 0.21%                      | 0.4                       | 0.01%                  | 0.9                   |
| 710 | 0.73%                 | 0.13                 | 0.79%              | 0.103             | 0.00%          | 0.9           | 0.43%          | 0.2           | 0.83%             | 0.109            | 0.10%                 | 0.59                 | 0.18%                      | 0.4                       | 0.12%                  | 0.5                   |
| 711 | 0.02%                 | 0.8                  | 0.74%              | 0.127             | 0.53%          | 0.2           | 0.23%          | 0.4           | 1.17%             | 0.059            | 0.00%                 | 0.95                 | 0.00%                      | 0.9                       | 0.19%                  | 0.4                   |
| 712 | 0.25%                 | 0.3                  | 0.57%              | 0.15              | 0.03%          | 0.8           | 0.11%          | 0.5           | 0.51%             | 0.2              | 0.57%                 | 0.19                 | 0.03%                      | 0.8                       | 0.00%                  | 0.9                   |
| 713 | 0.00%                 | 1                    | 0.02%              | 0.8               | 0.11%          | 0.5           | 0.27%          | 0.3           | 0.03%             | 0.76             | 0.00%                 | 0.99                 | 0.02%                      | 0.8                       | 0.32%                  | 0.3                   |
| 714 | 0.67%                 | 0.14                 | 0.06%              | 0.66              | 0.26%          | 0.4           | 0.33%          | 0.3           | 0.03%             | 0.75             | 0.13%                 | 0.53                 | 0.16%                      | 0.5                       | 0.09%                  | 0.6                   |
| 715 | 0.00%                 | 1                    | 0.25%              | 0.34              | 0.00%          | 1             | 1.55%          | 0.02          | 1.27%             | 0.04             | 1.10%                 | 0.065                | 0.64%                      | 0.15                      | 0.36%                  | 0.3                   |
| 716 | 0.50%                 | 0.2                  | 0.59%              | 0.148             | 0.10%          | 0.6           | 2.25%          | 0.007         | 1.14%             | 0.059            | 2.07%                 | 0.017                | 0.01%                      | 0.9                       | 3.51%                  | 0.0008                |
| 717 | 0.29%                 | 0.3                  | 0.05%              | 0.68              | 0.00%          | 1             | 0.15%          | 0.5           | 0.43%             | 0.25             | 0.03%                 | 0.78                 | 0.30%                      | 0.3                       | 0.03%                  | 0.8                   |
| 718 | 0.01%                 | 0.9                  | 0.07%              | 0.64              | 0.48%          | 0.2           | 0.20%          | 0.4           | 0.00%             | 0.97             | 0.44%                 | 0.26                 | 0.48%                      | 0.2                       | 0.00%                  | 1                     |
| 719 | 0.34%                 | 0.3                  | 0.32%              | 0.28              | 0.08%          | 0.6           | 0.25%          | 0.3           | 0.13%             | 0.5              | 1.06%                 | 0.065                | 0.06%                      | 0.7                       | 0.44%                  | 0.2                   |
| 720 | 0.49%                 | 0.2                  | 0.07%              | 0.6               | 0.07%          | 0.6           | 0.11%          | 0.5           | 0.29%             | 0.3              | 0.15%                 | 0.48                 | 0.04%                      | 0.7                       | 0.13%                  | 0.5                   |
| 721 | 0.08%                 | 0.6                  | 0.16%              | 0.46              | 0.03%          | 0.7           | 0.14%          | 0.5           | 0.70%             | 0.134            | 0.10%                 | 0.58                 | 1.12%                      | 0.06                      | 0.01%                  | 0.9                   |
| 722 | 0.04%                 | 0.7                  | 0.04%              | 0.72              | 0.02%          | 0.8           | 0.14%          | 0.5           | 0.46%             | 0.21             | 0.04%                 | 0.74                 | 0.02%                      | 0.8                       | 0.00%                  | 1                     |
| 723 | 0.02%                 | 0.8                  | 0.58%              | 0.123             | 0.31%          | 0.3           | 1.00%          | 0.06          | 1.45%             | 0.045            | 0.02%                 | 0.81                 | 0.01%                      | 0.9                       | 0.02%                  | 0.8                   |
| 724 | 0.07%                 | 0.6                  | 0.04%              | 0.72              | 0.09%          | 0.6           | 0.97%          | 0.06          | 0.58%             | 0.16             | 2.17%                 | 0.0082               | 0.05%                      | 0.7                       | 2.53%                  | 0.003                 |
| 725 | 0.06%                 | 0.6                  | 0.02%              | 0.78              | 0.10%          | 0.6           | 0.36%          | 0.3           | 0.01%             | 0.81             | 0.02%                 | 0.8                  | 0.28%                      | 0.3                       | 0.45%                  | 0.2                   |
| 726 | 0.09%                 | 0.6                  | 0.30%              | 0.31              | 0.49%          | 0.2           | 0.06%          | 0.6           | 1.01%             | 0.067            | 0.04%                 | 0.73                 | 0.13%                      | 0.5                       | 0.10%                  | 0.6                   |
| 727 | 0.01%                 | 0.8                  | 0.40%              | 0.25              | 0.02%          | 0.8           | 0.64%          | 0.14          | 0.77%             | 0.12             | 0.51%                 | 0.23                 | 0.19%                      | 0.4                       | 1.04%                  | 0.07                  |

|     | A   | B    | C          | D             | E             | F                      | G                | H                | I                      | J                     | K                  | L                 | M              | N             | O                         | P                        |
|-----|-----|------|------------|---------------|---------------|------------------------|------------------|------------------|------------------------|-----------------------|--------------------|-------------------|----------------|---------------|---------------------------|--------------------------|
| 1   | Chr | Gene | SNP ID     | Position (bp) | Position (cM) | Minor allele frequency | Hardy-Weinberg P | Reference allele | H2_Prepulse inhibition | P_Prepulse inhibition | H2_P50 suppression | P_P50 suppression | H2_Antisaccade | P_Antisaccade | H2_Continuous performance | P_Continuous performance |
| 728 | 7   | RELN | rs6958081  | 103079061     | 113.94        | 0.36                   | 0.753            | C                | 0.02%                  | 0.81                  | 0.36%              | 0.3               | 1.05%          | 0.067         | 1.41%                     | 0.028                    |
| 729 | 7   | RELN | rs1860686  | 103079680     | 113.94        | 0.13                   | 0.324            | C                | 0.78%                  | 0.128                 | 0.23%              | 0.5               | 0.50%          | 0.19          | 0.00%                     | 0.94                     |
| 730 | 7   | RELN | rs727531   | 103088691     | 113.94        | 0.29                   | 0.158            | T                | 0.07%                  | 0.66                  | 0.18%              | 0.5               | 0.60%          | 0.16          | 0.09%                     | 0.57                     |
| 731 | 7   | RELN | rs1012065  | 103098311     | 113.94        | 0.26                   | 0.263            | A                | 0.58%                  | 0.21                  | 0.00%              | 0.9               | 0.13%          | 0.53          | 0.00%                     | 0.91                     |
| 732 | 7   | RELN | rs12666897 | 103113430     | 113.94        | 0.21                   | 1.000            | T                | 0.55%                  | 0.19                  | 0.71%              | 0.2               | 0.45%          | 0.22          | 0.01%                     | 0.87                     |
| 733 | 7   | RELN | rs496907   | 103149720     | 113.94        | 0.31                   | 0.233            | C                | 0.02%                  | 0.8                   | 1.18%              | 0.09              | 0.87%          | 0.105         | 0.99%                     | 0.073                    |
| 734 | 7   | RELN | rs10487166 | 103162502     | 113.94        | 0.11                   | 0.436            | C                | 0.06%                  | 0.67                  | 0.00%              | 1                 | 0.27%          | 0.35          | 0.38%                     | 0.26                     |
| 735 | 7   | RELN | rs471360   | 103168085     | 113.94        | 0.15                   | 0.772            | C                | 0.19%                  | 0.44                  | 0.03%              | 0.8               | 0.03%          | 0.74          | 0.00%                     | 0.97                     |
| 736 | 7   | RELN | rs634500   | 103178645     | 113.94        | 0.40                   | 0.293            | C                | 0.01%                  | 0.89                  | 0.83%              | 0.15              | 0.08%          | 0.62          | 0.05%                     | 0.68                     |
| 737 | 7   | RELN | rs4446675  | 103184569     | 113.94        | 0.06                   | 1.000            | C                | 0.36%                  | 0.34                  | 1.04%              | 0.09              | 0.72%          | 0.14          | 0.11%                     | 0.57                     |
| 738 | 7   | RELN | rs694894   | 103184640     | 113.94        | 0.41                   | 0.880            | G                | 0.08%                  | 0.62                  | 1.30%              | 0.07              | 0.18%          | 0.45          | 0.02%                     | 0.82                     |
| 739 | 7   | RELN | rs10487169 | 103184694     | 113.94        | 0.05                   | 1.000            | C                | 0.25%                  | 0.42                  | 0.00%              | 0.9               | 0.09%          | 0.59          | 0.00%                     | 0.98                     |
| 740 | 7   | RELN | rs2283029  | 103185455     | 113.94        | 0.15                   | 0.777            | T                | 0.18%                  | 0.48                  | 0.44%              | 0.3               | 2.19%          | 0.0086        | 0.41%                     | 0.25                     |
| 741 | 7   | RELN | rs10487172 | 103189479     | 113.94        | 0.21                   | 0.538            | T                | 0.50%                  | 0.2                   | 0.08%              | 0.7               | 0.11%          | 0.54          | 0.04%                     | 0.71                     |
| 742 | 7   | RELN | rs141473   | 103194962     | 113.94        | 0.43                   | 1.000            | C                | 0.27%                  | 0.36                  | 0.30%              | 0.4               | 2.48%          | 0.0047        | 1.49%                     | 0.026                    |
| 743 | 7   | RELN | rs262340   | 103205478     | 113.94        | 0.34                   | 0.744            | G                | 0.01%                  | 0.89                  | 0.40%              | 0.3               | 0.37%          | 0.25          | 0.18%                     | 0.41                     |
| 744 | 7   | RELN | rs262342   | 103206219     | 113.94        | 0.25                   | 0.701            | G                | 0.09%                  | 0.6                   | 0.04%              | 0.8               | 0.89%          | 0.087         | 0.94%                     | 0.073                    |
| 745 | 7   | RELN | rs1510846  | 103208938     | 113.94        | 0.28                   | 0.463            | T                | 0.05%                  | 0.67                  | 0.11%              | 0.6               | 0.75%          | 0.114         | 0.00%                     | 0.91                     |
| 746 | 7   | RELN | rs262355   | 103213351     | 113.94        | 0.34                   | 0.873            | T                | 0.06%                  | 0.69                  | 1.09%              | 0.08              | 1.88%          | 0.016         | 0.91%                     | 0.089                    |
| 747 | 7   | RELN | rs1404431  | 103223839     | 113.94        | 0.20                   | 0.487            | A                | 0.07%                  | 0.63                  | 0.02%              | 0.8               | 3.37%          | 0.00077       | 0.05%                     | 0.66                     |
| 748 | 7   | RELN | rs39327    | 103231907     | 113.94        | 0.24                   | 0.420            | G                | 0.19%                  | 0.42                  | 0.30%              | 0.4               | 0.01%          | 0.85          | 0.27%                     | 0.33                     |
| 749 | 7   | RELN | rs39330    | 103236791     | 113.94        | 0.41                   | 0.762            | T                | 0.18%                  | 0.46                  | 0.03%              | 0.8               | 0.49%          | 0.21          | 0.27%                     | 0.34                     |
| 750 | 7   | RELN | rs6465937  | 103240727     | 113.94        | 0.45                   | 0.884            | G                | 1.02%                  | 0.082                 | 0.06%              | 0.7               | 0.56%          | 0.18          | 0.09%                     | 0.58                     |
| 751 | 7   | RELN | rs39343    | 103251234     | 113.94        | 0.30                   | 0.728            | A                | 0.53%                  | 0.19                  | 0.14%              | 0.5               | 0.09%          | 0.59          | 0.29%                     | 0.31                     |
| 752 | 7   | RELN | rs39379    | 103266305     | 113.95        | 0.24                   | 0.551            | G                | 0.23%                  | 0.41                  | 0.05%              | 0.7               | 0.00%          | 0.93          | 0.10%                     | 0.56                     |
| 753 | 7   | RELN | rs39383    | 103267479     | 113.95        | 0.41                   | 0.655            | G                | 0.62%                  | 0.16                  | 2.07%              | 0.02              | 0.09%          | 0.57          | 0.97%                     | 0.068                    |
| 754 | 7   | RELN | rs1848959  | 103268966     | 113.96        | 0.09                   | 1.000            | T                | 0.68%                  | 0.14                  | 0.08%              | 0.7               | 0.09%          | 0.59          | 0.03%                     | 0.73                     |
| 755 | 7   | RELN | rs2299394  | 103299179     | 117.10        | 0.13                   | 1.000            | G                | 0.18%                  | 0.43                  | 0.81%              | 0.2               | 0.13%          | 0.5           | 0.25%                     | 0.34                     |
| 756 | 7   | RELN | rs802786   | 103333644     | 117.17        | 0.24                   | 0.843            | G                | 0.41%                  | 0.26                  | 0.32%              | 0.4               | 0.04%          | 0.73          | 0.10%                     | 0.56                     |
| 757 | 7   | RELN | rs802787   | 103336960     | 117.18        | 0.41                   | 0.448            | G                | 0.27%                  | 0.34                  | 0.00%              | 0.9               | 0.00%          | 0.93          | 0.28%                     | 0.3                      |
| 758 | 7   | RELN | rs2299403  | 103343150     | 117.19        | 0.16                   | 0.594            | G                | 0.11%                  | 0.54                  | 0.52%              | 0.2               | 0.80%          | 0.098         | 0.12%                     | 0.51                     |
| 759 | 7   | RELN | rs10487175 | 103360382     | 117.22        | 0.06                   | 0.097            | C                | 0.02%                  | 0.8                   | 0.79%              | 0.13              | 0.01%          | 0.86          | 0.11%                     | 0.54                     |
| 760 | 7   | RELN | rs3735630  | 103361697     | 117.22        | 0.50                   | 1.000            | G                | 0.90%                  | 0.104                 | 0.81%              | 0.15              | 0.42%          | 0.25          | 0.94%                     | 0.071                    |

|     | Q                     | R                    | S                  | T                 | U              | V             | W              | X             | Y                 | Z                | AA                    | AB                   | AC                         | AD                        | AE                     | AF                    |
|-----|-----------------------|----------------------|--------------------|-------------------|----------------|---------------|----------------|---------------|-------------------|------------------|-----------------------|----------------------|----------------------------|---------------------------|------------------------|-----------------------|
| 1   | H2_Letter-Number Span | P_Letter-Number Span | H2_Verbal learning | P_Verbal learning | H2_Abstraction | P_Abstraction | H2_Face memory | P_Face memory | H2_Spatial memory | P_Spatial memory | H2_Spatial processing | P_Spatial processing | H2_Sensori-motor dexterity | P_Sensori-motor dexterity | H2_Emotion recognition | P_Emotion recognition |
| 728 | 0.24%                 | 0.4                  | 0.27%              | 0.32              | 0.13%          | 0.5           | 0.17%          | 0.4           | 0.29%             | 0.32             | 0.35%                 | 0.3                  | 0.02%                      | 0.8                       | 1.19%                  | 0.05                  |
| 729 | 1.60%                 | 0.02                 | 0.00%              | 0.92              | 0.68%          | 0.13          | 1.80%          | 0.014         | 0.42%             | 0.25             | 0.78%                 | 0.122                | 0.23%                      | 0.4                       | 0.19%                  | 0.4                   |
| 730 | 0.19%                 | 0.4                  | 0.01%              | 0.86              | 0.25%          | 0.3           | 0.04%          | 0.7           | 0.48%             | 0.19             | 0.10%                 | 0.58                 | 0.72%                      | 0.11                      | 0.27%                  | 0.3                   |
| 731 | 0.41%                 | 0.2                  | 0.35%              | 0.29              | 0.00%          | 0.9           | 1.05%          | 0.07          | 1.82%             | 0.021            | 0.25%                 | 0.41                 | 0.54%                      | 0.2                       | 0.06%                  | 0.7                   |
| 732 | 0.25%                 | 0.4                  | 0.00%              | 0.9               | 1.07%          | 0.05          | 0.96%          | 0.07          | 0.28%             | 0.34             | 0.21%                 | 0.43                 | 0.01%                      | 0.9                       | 0.07%                  | 0.6                   |
| 733 | 0.08%                 | 0.6                  | 0.03%              | 0.73              | 0.08%          | 0.6           | 0.79%          | 0.1           | 1.46%             | 0.027            | 1.28%                 | 0.044                | 0.32%                      | 0.3                       | 1.07%                  | 0.06                  |
| 734 | 0.19%                 | 0.4                  | 0.18%              | 0.42              | 0.05%          | 0.7           | 0.06%          | 0.7           | 0.04%             | 0.71             | 0.01%                 | 0.83                 | 0.27%                      | 0.3                       | 0.17%                  | 0.4                   |
| 735 | 0.18%                 | 0.4                  | 0.01%              | 0.85              | 0.00%          | 1             | 1.91%          | 0.008         | 1.25%             | 0.038            | 0.71%                 | 0.131                | 3.15%                      | 0.0014                    | 0.91%                  | 0.07                  |
| 736 | 0.35%                 | 0.3                  | 0.46%              | 0.19              | 0.33%          | 0.3           | 0.42%          | 0.2           | 1.06%             | 0.053            | 1.09%                 | 0.058                | 0.07%                      | 0.6                       | 0.94%                  | 0.07                  |
| 737 | 0.01%                 | 0.8                  | 0.71%              | 0.131             | 0.01%          | 0.8           | 0.31%          | 0.3           | 0.39%             | 0.31             | 0.61%                 | 0.21                 | 0.02%                      | 0.8                       | 0.67%                  | 0.2                   |
| 738 | 0.05%                 | 0.7                  | 0.63%              | 0.144             | 0.01%          | 0.8           | 0.42%          | 0.2           | 0.62%             | 0.16             | 0.01%                 | 0.84                 | 0.75%                      | 0.14                      | 0.05%                  | 0.7                   |
| 739 | 0.01%                 | 0.8                  | 0.02%              | 0.8               | 0.01%          | 0.9           | 0.08%          | 0.6           | 0.43%             | 0.26             | 0.63%                 | 0.18                 | 0.22%                      | 0.4                       | 0.71%                  | 0.14                  |
| 740 | 0.11%                 | 0.5                  | 0.01%              | 0.85              | 0.12%          | 0.5           | 0.54%          | 0.2           | 1.09%             | 0.055            | 0.73%                 | 0.129                | 0.22%                      | 0.4                       | 0.00%                  | 1                     |
| 741 | 0.06%                 | 0.6                  | 0.02%              | 0.77              | 0.03%          | 0.7           | 0.04%          | 0.7           | 0.00%             | 0.9              | 0.02%                 | 0.78                 | 0.10%                      | 0.5                       | 0.38%                  | 0.2                   |
| 742 | 0.06%                 | 0.6                  | 0.59%              | 0.141             | 0.00%          | 1             | 0.06%          | 0.6           | 0.55%             | 0.17             | 0.44%                 | 0.24                 | 0.50%                      | 0.2                       | 0.14%                  | 0.5                   |
| 743 | 0.31%                 | 0.3                  | 0.05%              | 0.65              | 0.51%          | 0.2           | 0.19%          | 0.4           | 0.02%             | 0.76             | 0.65%                 | 0.133                | 0.43%                      | 0.3                       | 0.00%                  | 0.9                   |
| 744 | 0.41%                 | 0.2                  | 0.92%              | 0.068             | 0.18%          | 0.4           | 0.28%          | 0.3           | 0.83%             | 0.09             | 0.17%                 | 0.47                 | 0.25%                      | 0.4                       | 0.15%                  | 0.5                   |
| 745 | 0.02%                 | 0.8                  | 0.58%              | 0.14              | 0.19%          | 0.4           | 0.51%          | 0.2           | 0.10%             | 0.55             | 0.47%                 | 0.22                 | 0.24%                      | 0.4                       | 0.07%                  | 0.6                   |
| 746 | 0.13%                 | 0.5                  | 1.23%              | 0.039             | 0.09%          | 0.6           | 0.00%          | 0.9           | 0.46%             | 0.22             | 0.13%                 | 0.54                 | 0.00%                      | 1                         | 0.06%                  | 0.7                   |
| 747 | 0.02%                 | 0.8                  | 0.38%              | 0.23              | 0.05%          | 0.7           | 0.02%          | 0.8           | 0.11%             | 0.54             | 0.04%                 | 0.73                 | 0.14%                      | 0.5                       | 0.11%                  | 0.5                   |
| 748 | 0.91%                 | 0.06                 | 0.00%              | 0.95              | 0.27%          | 0.4           | 0.02%          | 0.8           | 0.02%             | 0.8              | 0.37%                 | 0.27                 | 0.03%                      | 0.7                       | 0.16%                  | 0.4                   |
| 749 | 0.05%                 | 0.7                  | 0.47%              | 0.19              | 0.10%          | 0.5           | 0.02%          | 0.8           | 0.00%             | 0.9              | 0.00%                 | 1                    | 0.61%                      | 0.2                       | 0.02%                  | 0.8                   |
| 750 | 0.65%                 | 0.12                 | 1.16%              | 0.041             | 0.00%          | 0.9           | 0.12%          | 0.5           | 0.02%             | 0.81             | 0.17%                 | 0.47                 | 0.06%                      | 0.6                       | 0.00%                  | 1                     |
| 751 | 0.37%                 | 0.2                  | 0.38%              | 0.23              | 0.24%          | 0.4           | 0.04%          | 0.7           | 0.63%             | 0.134            | 0.01%                 | 0.84                 | 0.07%                      | 0.6                       | 0.09%                  | 0.6                   |
| 752 | 0.08%                 | 0.6                  | 0.00%              | 1                 | 0.58%          | 0.2           | 0.32%          | 0.3           | 0.94%             | 0.072            | 0.16%                 | 0.48                 | 0.15%                      | 0.5                       | 0.02%                  | 0.8                   |
| 753 | 0.01%                 | 0.9                  | 0.31%              | 0.28              | 0.07%          | 0.6           | 0.09%          | 0.6           | 0.02%             | 0.81             | 0.02%                 | 0.82                 | 0.17%                      | 0.4                       | 0.50%                  | 0.2                   |
| 754 | 0.04%                 | 0.7                  | 0.48%              | 0.17              | 0.30%          | 0.3           | 0.72%          | 0.09          | 0.15%             | 0.45             | 0.10%                 | 0.54                 | 0.11%                      | 0.5                       | 0.50%                  | 0.2                   |
| 755 | 0.56%                 | 0.14                 | 0.20%              | 0.38              | 0.01%          | 0.9           | 0.28%          | 0.3           | 0.14%             | 0.48             | 0.07%                 | 0.61                 | 0.02%                      | 0.8                       | 0.12%                  | 0.5                   |
| 756 | 0.27%                 | 0.3                  | 0.02%              | 0.81              | 0.01%          | 0.8           | 0.53%          | 0.2           | 1.81%             | 0.0126           | 0.03%                 | 0.75                 | 0.77%                      | 0.11                      | 0.02%                  | 0.8                   |
| 757 | 0.13%                 | 0.5                  | 0.02%              | 0.79              | 0.01%          | 0.9           | 1.51%          | 0.02          | 1.69%             | 0.0116           | 0.00%                 | 1                    | 0.14%                      | 0.5                       | 0.05%                  | 0.7                   |
| 758 | 0.07%                 | 0.6                  | 0.19%              | 0.38              | 0.04%          | 0.7           | 0.05%          | 0.6           | 0.01%             | 0.88             | 0.44%                 | 0.21                 | 0.32%                      | 0.3                       | 0.20%                  | 0.4                   |
| 759 | 0.03%                 | 0.7                  | 0.61%              | 0.117             | 0.05%          | 0.7           | 0.45%          | 0.2           | 1.99%             | 0.011            | 0.42%                 | 0.27                 | 0.21%                      | 0.4                       | 1.21%                  | 0.04                  |
| 760 | 0.02%                 | 0.8                  | 0.32%              | 0.28              | 0.34%          | 0.3           | 0.81%          | 0.09          | 0.60%             | 0.146            | 0.13%                 | 0.52                 | 0.06%                      | 0.6                       | 0.02%                  | 0.8                   |

|     | A   | B       | C          | D             | E             | F                      | G                | H                | I                      | J                     | K                  | L                 | M              | N             | O                         | P                        |
|-----|-----|---------|------------|---------------|---------------|------------------------|------------------|------------------|------------------------|-----------------------|--------------------|-------------------|----------------|---------------|---------------------------|--------------------------|
| 1   | Chr | Gene    | SNP ID     | Position (bp) | Position (cM) | Minor allele frequency | Hardy-Weinberg P | Reference allele | H2_Prepulse inhibition | P_Prepulse inhibition | H2_P50 suppression | P_P50 suppression | H2_Antisaccade | P_Antisaccade | H2_Continuous performance | P_Continuous performance |
| 761 | 7   | RELN    | rs6965133  | 103368862     | 117.24        | 0.19                   | 1.000            | G                | 0.02%                  | 0.81                  | 0.22%              | 0.4               | 0.29%          | 0.32          | 0.03%                     | 0.75                     |
| 762 | 7   | RELN    | rs7808549  | 103370996     | 117.24        | 0.19                   | 0.052            | A                | 0.34%                  | 0.31                  | 1.09%              | 0.08              | 0.01%          | 0.83          | 0.17%                     | 0.45                     |
| 763 | 7   | RELN    | rs876425   | 103371937     | 117.24        | 0.35                   | 0.109            | A                | 0.11%                  | 0.55                  | 0.40%              | 0.3               | 0.14%          | 0.5           | 0.10%                     | 0.54                     |
| 764 | 7   | RELN    | rs10237086 | 103402273     | 117.30        | 0.32                   | 0.867            | G                | 0.01%                  | 0.86                  | 0.01%              | 0.9               | 0.27%          | 0.36          | 0.09%                     | 0.58                     |
| 765 | 7   | RELN    | rs10487180 | 103406534     | 117.31        | 0.16                   | 0.423            | C                | 0.27%                  | 0.38                  | 0.09%              | 0.6               | 0.33%          | 0.31          | 0.02%                     | 0.79                     |
| 766 | 7   | KCNH2   | rs4725982  | 150268796     | 174.98        | 0.23                   | 0.677            | C                | 0.00%                  | 0.92                  | 0.22%              | 0.5               | 0.12%          | 0.54          | 0.00%                     | 1                        |
| 767 | 7   | KCNH2   | rs6947240  | 150288142     | 175.09        | 0.23                   | 0.687            | G                | 0.03%                  | 0.77                  | 0.14%              | 0.5               | 0.11%          | 0.54          | 0.62%                     | 0.139                    |
| 768 | 7   | KCNH2   | rs2968857  | 150293263     | 175.12        | 0.35                   | 0.428            | T                | 0.03%                  | 0.76                  | 0.01%              | 0.9               | 0.03%          | 0.75          | 0.91%                     | 0.094                    |
| 769 | 8   | SLC18A1 | rs17092104 | 20049834      | 49.47         | 0.08                   | 0.326            | C                | 0.31%                  | 0.32                  | 0.03%              | 0.8               | 2.03%          | 0.0097        | 0.00%                     | 0.99                     |
| 770 | 8   | SLC18A1 | rs903997   | 20049996      | 49.47         | 0.19                   | 0.341            | G                | 0.29%                  | 0.34                  | 0.01%              | 0.9               | 0.45%          | 0.23          | 0.45%                     | 0.22                     |
| 771 | 8   | SLC18A1 | rs6992927  | 20074325      | 49.47         | 0.25                   | 0.552            | A                | 0.65%                  | 0.143                 | 0.16%              | 0.6               | 1.21%          | 0.045         | 0.16%                     | 0.46                     |
| 772 | 8   | SLC18A1 | rs1390938  | 20080993      | 49.47         | 0.25                   | 0.563            | G                | 0.78%                  | 0.108                 | 0.70%              | 0.2               | 1.13%          | 0.052         | 0.19%                     | 0.42                     |
| 773 | 8   | SLC18A1 | rs2270637  | 20081107      | 49.47         | 0.16                   | 0.424            | C                | 0.09%                  | 0.62                  | 0.61%              | 0.2               | 0.02%          | 0.79          | 0.02%                     | 0.82                     |
| 774 | 8   | SLC18A1 | rs2270641  | 20082746      | 49.47         | 0.37                   | 1.000            | T                | 0.06%                  | 0.68                  | 0.01%              | 0.9               | 0.06%          | 0.66          | 0.06%                     | 0.66                     |
| 775 | 8   | SLC18A1 | rs7820517  | 20088916      | 49.47         | 0.17                   | 0.792            | T                | 0.58%                  | 0.22                  | 0.26%              | 0.4               | 0.51%          | 0.22          | 0.01%                     | 0.83                     |
| 776 | 8   | PPP3CC  | rs7837713  | 22375143      | 53.65         | 0.06                   | 1.000            | T                | 1.48%                  | 0.057                 | 0.16%              | 0.5               | 0.55%          | 0.23          | 0.20%                     | 0.45                     |
| 777 | 8   | PPP3CC  | rs2443502  | 22396444      | 53.70         | 0.49                   | 0.560            | A                | 0.21%                  | 0.43                  | 0.03%              | 0.8               | 0.33%          | 0.31          | 1.28%                     | 0.042                    |
| 778 | 8   | PPP3CC  | rs2469749  | 22413543      | 53.74         | 0.32                   | 0.176            | C                | 0.23%                  | 0.41                  | 0.04%              | 0.7               | 0.31%          | 0.31          | 0.04%                     | 0.74                     |
| 779 | 8   | EBF2    | rs4568629  | 25785669      | 58.95         | 0.44                   | 0.019            | G                | 0.02%                  | 0.8                   | 0.38%              | 0.3               | 0.00%          | 0.93          | 0.00%                     | 0.9                      |
| 780 | 8   | EBF2    | rs10106488 | 25793729      | 58.97         | 0.49                   | 0.149            | A                | 0.00%                  | 0.92                  | 0.12%              | 0.6               | 0.11%          | 0.56          | 0.05%                     | 0.69                     |
| 781 | 8   | EBF2    | rs11781208 | 25796328      | 58.97         | 0.46                   | 0.009            | T                | 0.03%                  | 0.77                  | 0.36%              | 0.3               | 0.00%          | 0.92          | 0.00%                     | 0.92                     |
| 782 | 8   | EBF2    | rs10503779 | 25799345      | 58.98         | 0.44                   | 0.008            | A                | 0.02%                  | 0.83                  | 2.62%              | 0.011             | 0.40%          | 0.27          | 0.03%                     | 0.76                     |
| 783 | 8   | NRG1    | rs4281084  | 31614916      | 67.60         | 0.23                   | 0.211            | G                | 0.94%                  | 0.088                 | 0.15%              | 0.5               | 0.11%          | 0.55          | 0.05%                     | 0.68                     |
| 784 | 8   | NRG1    | rs7819063  | 31618950      | 67.60         | 0.30                   | 0.292            | C                | 0.13%                  | 0.54                  | 0.97%              | 0.1               | 0.08%          | 0.61          | 0.02%                     | 0.79                     |
| 785 | 8   | NRG1    | rs10113797 | 31629879      | 67.61         | 0.46                   | 0.559            | C                | 0.31%                  | 0.35                  | 0.30%              | 0.4               | 0.01%          | 0.89          | 0.03%                     | 0.75                     |
| 786 | 8   | NRG1    | rs7840792  | 31632615      | 67.61         | 0.03                   | 0.003            | G                | 0.71%                  | 0.23                  | 0.01%              | 0.9               | 0.30%          | 0.26          | 0.59%                     | 0.15                     |
| 787 | 8   | NRG1    | rs4403369  | 31664440      | 67.64         | 0.13                   | 1.000            | A                | 0.06%                  | 0.67                  | 0.55%              | 0.3               | 0.53%          | 0.2           | 0.59%                     | 0.16                     |
| 788 | 8   | NRG1    | rs4733271  | 31686548      | 67.65         | 0.23                   | 0.540            | T                | 0.01%                  | 0.84                  | 0.31%              | 0.4               | 0.17%          | 0.44          | 0.29%                     | 0.32                     |
| 789 | 8   | NRG1    | rs12155594 | 31726137      | 67.68         | 0.08                   | 0.370            | C                | 0.08%                  | 0.59                  | 0.05%              | 0.7               | 0.33%          | 0.29          | 0.03%                     | 0.75                     |
| 790 | 8   | NRG1    | rs1827536  | 31732659      |               | 0.00                   | 1.000            |                  |                        |                       |                    |                   |                |               |                           |                          |
| 791 | 8   | NRG1    | rs13270788 | 31750525      | 67.70         | 0.38                   | 1.000            | A                | 0.06%                  | 0.68                  | 0.13%              | 0.6               | 0.22%          | 0.42          | 0.04%                     | 0.71                     |
| 792 | 8   | NRG1    | rs10503888 | 31753095      | 67.70         | 0.03                   | 0.219            | T                | 0.31%                  | 0.33                  | 0.31%              | 0.4               | 0.07%          | 0.65          | 0.29%                     | 0.36                     |
| 793 | 8   | NRG1    | rs10087212 | 31773072      | 67.71         | 0.47                   | 0.020            | G                | 1.65%                  | 0.028                 | 0.03%              | 0.8               | 0.10%          | 0.59          | 0.89%                     | 0.092                    |

|     | Q                     | R                    | S                  | T                 | U              | V             | W              | X             | Y                 | Z                | AA                    | AB                   | AC                         | AD                        | AE                     | AF                    |
|-----|-----------------------|----------------------|--------------------|-------------------|----------------|---------------|----------------|---------------|-------------------|------------------|-----------------------|----------------------|----------------------------|---------------------------|------------------------|-----------------------|
| 1   | H2_Letter-Number Span | P_Letter-Number Span | H2_Verbal learning | P_Verbal learning | H2_Abstraction | P_Abstraction | H2_Face memory | P_Face memory | H2_Spatial memory | P_Spatial memory | H2_Spatial processing | P_Spatial processing | H2_Sensori-motor dexterity | P_Sensori-motor dexterity | H2_Emotion recognition | P_Emotion recognition |
| 761 | 0.60%                 | 0.13                 | 0.13%              | 0.49              | 0.22%          | 0.4           | 0.00%          | 1             | 0.00%             | 0.99             | 0.21%                 | 0.39                 | 0.10%                      | 0.5                       | 0.04%                  | 0.7                   |
| 762 | 0.13%                 | 0.5                  | 0.00%              | 0.92              | 0.16%          | 0.4           | 0.02%          | 0.8           | 0.00%             | 0.95             | 0.82%                 | 0.098                | 0.69%                      | 0.12                      | 0.01%                  | 0.9                   |
| 763 | 1.04%                 | 0.05                 | 0.32%              | 0.27              | 0.09%          | 0.6           | 0.01%          | 0.9           | 0.28%             | 0.31             | 0.53%                 | 0.18                 | 0.30%                      | 0.3                       | 0.07%                  | 0.6                   |
| 764 | 0.02%                 | 0.8                  | 0.17%              | 0.44              | 0.00%          | 1             | 0.04%          | 0.7           | 0.27%             | 0.35             | 0.37%                 | 0.29                 | 0.02%                      | 0.8                       | 0.08%                  | 0.6                   |
| 765 | 0.29%                 | 0.3                  | 0.01%              | 0.87              | 0.04%          | 0.7           | 0.48%          | 0.2           | 0.39%             | 0.25             | 0.22%                 | 0.39                 | 1.10%                      | 0.05                      | 0.06%                  | 0.6                   |
| 766 | 0.24%                 | 0.4                  | 0.15%              | 0.46              | 0.11%          | 0.5           | 0.83%          | 0.08          | 0.03%             | 0.74             | 0.02%                 | 0.81                 | 0.28%                      | 0.3                       | 0.08%                  | 0.6                   |
| 767 | 0.44%                 | 0.2                  | 0.59%              | 0.137             | 0.29%          | 0.3           | 0.19%          | 0.4           | 0.02%             | 0.8              | 0.10%                 | 0.58                 | 0.46%                      | 0.2                       | 0.01%                  | 0.9                   |
| 768 | 0.01%                 | 0.9                  | 0.33%              | 0.29              | 0.11%          | 0.6           | 0.03%          | 0.8           | 0.08%             | 0.63             | 0.61%                 | 0.19                 | 0.25%                      | 0.4                       | 0.09%                  | 0.6                   |
| 769 | 1.16%                 | 0.04                 | 0.00%              | 0.91              | 0.29%          | 0.3           | 0.16%          | 0.4           | 0.42%             | 0.22             | 0.63%                 | 0.15                 | 0.28%                      | 0.4                       | 0.86%                  | 0.1                   |
| 770 | 0.11%                 | 0.5                  | 0.45%              | 0.2               | 0.31%          | 0.3           | 0.32%          | 0.3           | 0.60%             | 0.17             | 0.00%                 | 0.91                 | 0.00%                      | 0.9                       | 0.03%                  | 0.7                   |
| 771 | 0.03%                 | 0.7                  | 0.28%              | 0.31              | 0.38%          | 0.3           | 0.19%          | 0.5           | 0.02%             | 0.82             | 0.04%                 | 0.74                 | 0.19%                      | 0.5                       | 0.35%                  | 0.3                   |
| 772 | 0.02%                 | 0.8                  | 0.44%              | 0.2               | 0.51%          | 0.2           | 0.27%          | 0.3           | 0.07%             | 0.62             | 0.13%                 | 0.53                 | 0.10%                      | 0.6                       | 1.65%                  | 0.02                  |
| 773 | 0.01%                 | 0.8                  | 0.35%              | 0.28              | 0.12%          | 0.5           | 0.97%          | 0.06          | 0.35%             | 0.29             | 0.02%                 | 0.79                 | 0.95%                      | 0.08                      | 0.70%                  | 0.13                  |
| 774 | 0.87%                 | 0.09                 | 0.31%              | 0.29              | 0.03%          | 0.7           | 0.55%          | 0.2           | 0.35%             | 0.28             | 0.19%                 | 0.43                 | 1.04%                      | 0.07                      | 0.62%                  | 0.2                   |
| 775 | 0.11%                 | 0.6                  | 0.07%              | 0.64              | 0.24%          | 0.4           | 1.23%          | 0.04          | 0.05%             | 0.7              | 0.05%                 | 0.72                 | 0.90%                      | 0.09                      | 0.56%                  | 0.2                   |
| 776 | 0.32%                 | 0.3                  | 0.00%              | 0.96              | 0.67%          | 0.2           | 0.28%          | 0.4           | 1.03%             | 0.087            | 0.01%                 | 0.87                 | 0.15%                      | 0.5                       | 0.04%                  | 0.7                   |
| 777 | 0.13%                 | 0.5                  | 0.40%              | 0.24              | 1.32%          | 0.03          | 0.07%          | 0.6           | 1.23%             | 0.046            | 0.75%                 | 0.134                | 1.50%                      | 0.03                      | 0.18%                  | 0.4                   |
| 778 | 0.00%                 | 1                    | 0.77%              | 0.103             | 0.60%          | 0.2           | 0.14%          | 0.5           | 0.18%             | 0.45             | 0.29%                 | 0.36                 | 0.00%                      | 1                         | 0.07%                  | 0.6                   |
| 779 | 0.01%                 | 0.9                  | 0.15%              | 0.46              | 0.45%          | 0.2           | 0.15%          | 0.5           | 0.05%             | 0.69             | 1.29%                 | 0.042                | 1.09%                      | 0.05                      | 1.44%                  | 0.02                  |
| 780 | 0.01%                 | 0.8                  | 0.09%              | 0.56              | 0.06%          | 0.7           | 0.24%          | 0.4           | 0.00%             | 0.98             | 0.71%                 | 0.133                | 0.39%                      | 0.2                       | 1.69%                  | 0.02                  |
| 781 | 0.01%                 | 0.8                  | 0.15%              | 0.45              | 0.45%          | 0.2           | 0.26%          | 0.3           | 0.00%             | 0.95             | 1.10%                 | 0.064                | 1.37%                      | 0.03                      | 1.69%                  | 0.02                  |
| 782 | 0.04%                 | 0.7                  | 0.04%              | 0.69              | 0.27%          | 0.3           | 0.16%          | 0.4           | 0.03%             | 0.74             | 1.28%                 | 0.048                | 1.05%                      | 0.06                      | 0.75%                  | 0.11                  |
| 783 | 1.04%                 | 0.05                 | 0.02%              | 0.77              | 0.16%          | 0.5           | 0.07%          | 0.6           | 0.00%             | 1                | 6.92%                 | 6.40E-06             | 1.71%                      | 0.02                      | 1.98%                  | 0.01                  |
| 784 | 0.46%                 | 0.2                  | 0.05%              | 0.67              | 0.07%          | 0.6           | 0.08%          | 0.6           | 0.15%             | 0.48             | 0.10%                 | 0.58                 | 0.21%                      | 0.4                       | 0.04%                  | 0.7                   |
| 785 | 0.02%                 | 0.8                  | 0.05%              | 0.68              | 0.06%          | 0.7           | 0.02%          | 0.8           | 0.01%             | 0.83             | 0.75%                 | 0.146                | 0.29%                      | 0.3                       | 0.44%                  | 0.2                   |
| 786 | 0.17%                 | 0.4                  | 0.23%              | 0.34              | 0.01%          | 0.9           | 0.09%          | 0.5           | 0.05%             | 0.62             | 0.54%                 | 0.13                 | 0.05%                      | 0.6                       | 0.07%                  | 0.6                   |
| 787 | 0.00%                 | 0.9                  | 0.30%              | 0.3               | 0.35%          | 0.3           | 0.00%          | 0.9           | 0.45%             | 0.24             | 0.40%                 | 0.28                 | 0.06%                      | 0.7                       | 0.52%                  | 0.2                   |
| 788 | 0.52%                 | 0.2                  | 0.59%              | 0.14              | 0.22%          | 0.4           | 0.42%          | 0.2           | 0.04%             | 0.71             | 0.46%                 | 0.23                 | 0.00%                      | 0.9                       | 0.30%                  | 0.3                   |
| 789 | 0.06%                 | 0.6                  | 0.03%              | 0.73              | 0.02%          | 0.8           | 0.29%          | 0.3           | 0.00%             | 0.93             | 0.16%                 | 0.5                  | 0.14%                      | 0.5                       | 0.02%                  | 0.8                   |
| 790 |                       |                      |                    |                   |                |               |                |               |                   |                  |                       |                      |                            |                           |                        |                       |
| 791 | 0.54%                 | 0.2                  | 0.76%              | 0.108             | 0.06%          | 0.7           | 0.97%          | 0.08          | 0.09%             | 0.61             | 0.11%                 | 0.58                 | 0.00%                      | 1                         | 0.04%                  | 0.7                   |
| 792 | 1.11%                 | 0.06                 | 0.64%              | 0.146             | 4.06%          | 0.0003        | 1.79%          | 0.02          | 0.10%             | 0.57             | 0.10%                 | 0.59                 | 0.51%                      | 0.2                       | 0.40%                  | 0.3                   |
| 793 | 0.36%                 | 0.3                  | 0.09%              | 0.57              | 0.84%          | 0.09          | 0.06%          | 0.7           | 0.10%             | 0.58             | 0.15%                 | 0.51                 | 0.01%                      | 0.9                       | 0.12%                  | 0.5                   |



|     | A   | B    | C          | D             | E             | F                      | G                | H                | I                      | J                     | K                  | L                 | M              | N             | O                         | P                        |
|-----|-----|------|------------|---------------|---------------|------------------------|------------------|------------------|------------------------|-----------------------|--------------------|-------------------|----------------|---------------|---------------------------|--------------------------|
| 1   | Chr | Gene | SNP ID     | Position (bp) | Position (cM) | Minor allele frequency | Hardy-Weinberg P | Reference allele | H2_Prepulse inhibition | P_Prepulse inhibition | H2_P50 suppression | P_P50 suppression | H2_Antisaccade | P_Antisaccade | H2_Continuous performance | P_Continuous performance |
| 794 | 8   | NRG1 | rs2062817  | 31781972      | 67.72         | 0.24                   | 0.430            | C                | 0.91%                  | 0.126                 | 0.55%              | 0.3               | 0.03%          | 0.77          | 0.07%                     | 0.66                     |
| 795 | 8   | NRG1 | rs10081404 | 31794013      |               | 0.00                   | 1.000            |                  |                        |                       |                    |                   |                |               |                           |                          |
| 796 | 8   | NRG1 | rs6987310  | 31795172      | 67.73         | 0.30                   | 0.726            | A                | 1.75%                  | 0.026                 | 0.40%              | 0.3               | 0.24%          | 0.4           | 0.20%                     | 0.43                     |
| 797 | 8   | NRG1 | rs776401   | 31836504      | 67.74         | 0.40                   | 0.364            | T                | 1.83%                  | 0.019                 | 0.12%              | 0.6               | 0.17%          | 0.46          | 0.80%                     | 0.101                    |
| 798 | 8   | NRG1 | rs10503895 | 31853189      | 67.74         | 0.15                   | 0.169            | T                | 0.14%                  | 0.49                  | 0.02%              | 0.8               | 0.09%          | 0.58          | 0.77%                     | 0.102                    |
| 799 | 8   | NRG1 | rs776387   | 31857593      | 67.74         | 0.44                   | 0.465            | A                | 0.96%                  | 0.109                 | 0.07%              | 0.7               | 0.17%          | 0.49          | 0.05%                     | 0.7                      |
| 800 | 8   | NRG1 | rs1875722  | 31879970      | 67.74         | 0.25                   | 1.000            | T                | 0.35%                  | 0.35                  | 0.07%              | 0.7               | 0.09%          | 0.64          | 0.51%                     | 0.24                     |
| 801 | 8   | NRG1 | rs884530   | 31889125      | 67.74         | 0.13                   | 0.051            | C                | 0.15%                  | 0.46                  | 0.00%              | 1                 | 0.11%          | 0.52          | 0.12%                     | 0.49                     |
| 802 | 8   | NRG1 | rs1481625  | 31899469      | 67.74         | 0.34                   | 0.513            | T                | 0.98%                  | 0.082                 | 1.76%              | 0.04              | 0.10%          | 0.58          | 0.50%                     | 0.19                     |
| 803 | 8   | NRG1 | rs7002063  | 31923076      | 67.74         | 0.25                   | 0.696            | A                | 0.15%                  | 0.51                  | 0.21%              | 0.4               | 0.02%          | 0.81          | 0.02%                     | 0.8                      |
| 804 | 8   | NRG1 | rs1462878  | 31945845      | 67.74         | 0.20                   | 0.491            | C                | 0.04%                  | 0.72                  | 0.31%              | 0.4               | 0.04%          | 0.72          | 0.34%                     | 0.3                      |
| 805 | 8   | NRG1 | rs327325   | 31988398      | 67.76         | 0.30                   | 0.728            | T                | 0.01%                  | 0.91                  | 0.06%              | 0.7               | 0.03%          | 0.76          | 0.01%                     | 0.85                     |
| 806 | 8   | NRG1 | rs10954818 | 31995681      | 67.76         | 0.27                   | 0.856            | A                | 0.14%                  | 0.54                  | 0.02%              | 0.8               | 0.28%          | 0.34          | 0.02%                     | 0.79                     |
| 807 | 8   | NRG1 | rs1462906  | 32016134      | 67.77         | 0.07                   | 0.004            | C                | 1.47%                  | 0.032                 | 0.07%              | 0.6               | 0.02%          | 0.79          | 0.00%                     | 0.98                     |
| 808 | 8   | NRG1 | rs10954822 | 32026808      | 67.77         | 0.12                   | 1.000            | A                | 0.12%                  | 0.57                  | 0.16%              | 0.5               | 0.00%          | 0.95          | 0.02%                     | 0.79                     |
| 809 | 8   | NRG1 | rs956203   | 32030300      | 67.77         | 0.40                   | 0.290            | A                | 0.08%                  | 0.64                  | 0.59%              | 0.2               | 0.12%          | 0.54          | 0.33%                     | 0.3                      |
| 810 | 8   | NRG1 | rs9297185  | 32063570      | 67.78         | 0.29                   | 0.283            | C                | 0.00%                  | 0.97                  | 0.15%              | 0.5               | 0.06%          | 0.65          | 0.02%                     | 0.77                     |
| 811 | 8   | NRG1 | rs10503899 | 32066776      | 67.79         | 0.40                   | 0.452            | A                | 0.26%                  | 0.4                   | 2.32%              | 0.02              | 0.43%          | 0.26          | 0.58%                     | 0.18                     |
| 812 | 8   | NRG1 | rs11776959 | 32068406      | 67.79         | 0.41                   | 0.066            | G                | 0.00%                  | 0.92                  | 0.01%              | 0.9               | 0.00%          | 0.94          | 0.09%                     | 0.58                     |
| 813 | 8   | NRG1 | rs9297186  | 32079918      | 67.79         | 0.14                   | 1.000            | C                | 0.26%                  | 0.41                  | 0.15%              | 0.6               | 0.00%          | 0.94          | 0.10%                     | 0.58                     |
| 814 | 8   | NRG1 | rs1481756  | 32086787      | 67.79         | 0.37                   | 0.085            | G                | 0.00%                  | 0.99                  | 2.43%              | 0.013             | 0.01%          | 0.84          | 0.16%                     | 0.47                     |
| 815 | 8   | NRG1 | rs1481762  | 32110769      | 67.80         | 0.43                   | 0.555            | C                | 0.04%                  | 0.74                  | 0.20%              | 0.5               | 0.22%          | 0.38          | 0.03%                     | 0.76                     |
| 816 | 8   | NRG1 | rs1481763  | 32113352      | 67.80         | 0.46                   | 0.463            | G                | 0.19%                  | 0.46                  | 0.02%              | 0.8               | 0.17%          | 0.47          | 0.07%                     | 0.63                     |
| 817 | 8   | NRG1 | rs6468085  | 32120207      | 67.80         | 0.19                   | 0.308            | G                | 0.00%                  | 0.94                  | 1.09%              | 0.11              | 0.44%          | 0.24          | 0.21%                     | 0.41                     |
| 818 | 8   | NRG1 | rs1383964  | 32123716      | 67.80         | 0.49                   | 0.029            | C                | 0.01%                  | 0.88                  | 0.04%              | 0.7               | 0.01%          | 0.83          | 0.67%                     | 0.138                    |
| 819 | 8   | NRG1 | rs4733299  | 32136282      | 67.81         | 0.08                   | 0.604            | T                | 0.16%                  | 0.48                  | 0.00%              | 0.9               | 0.34%          | 0.29          | 0.39%                     | 0.25                     |
| 820 | 8   | NRG1 | rs7002832  | 32173915      | 67.82         | 0.09                   | 1.000            | C                | 0.03%                  | 0.76                  | 1.02%              | 0.11              | 0.09%          | 0.59          | 0.65%                     | 0.136                    |
| 821 | 8   | NRG1 | rs10110401 | 32175992      | 67.82         | 0.02                   | 1.000            | T                | 0.05%                  | 0.69                  | 0.40%              | 0.3               | 0.05%          | 0.7           | 0.27%                     | 0.36                     |
| 822 | 8   | NRG1 | rs7001060  | 32186009      | 67.83         | 0.10                   | 0.690            | T                | 0.11%                  | 0.56                  | 0.24%              | 0.4               | 1.01%          | 0.061         | 0.81%                     | 0.09                     |
| 823 | 8   | NRG1 | rs6468090  | 32195591      | 67.83         | 0.20                   | 0.507            | C                | 0.00%                  | 1                     | 0.37%              | 0.3               | 0.12%          | 0.54          | 0.35%                     | 0.27                     |
| 824 | 8   | NRG1 | rs12549243 | 32200083      | 67.83         | 0.10                   | 0.645            | G                | 1.48%                  | 0.039                 | 0.40%              | 0.3               | 0.02%          | 0.82          | 0.57%                     | 0.18                     |
| 825 | 8   | NRG1 | rs11782156 | 32216518      | 67.83         | 0.42                   | 0.240            | G                | 0.04%                  | 0.74                  | 0.04%              | 0.7               | 0.28%          | 0.34          | 0.08%                     | 0.6                      |
| 826 | 8   | NRG1 | rs1351510  | 32223600      | 67.83         | 0.29                   | 0.155            | C                | 0.42%                  | 0.27                  | 1.57%              | 0.04              | 0.48%          | 0.22          | 0.00%                     | 0.96                     |

|     | Q                     | R                    | S                  | T                 | U              | V             | W              | X             | Y                 | Z                | AA                    | AB                   | AC                         | AD                        | AE                     | AF                    |
|-----|-----------------------|----------------------|--------------------|-------------------|----------------|---------------|----------------|---------------|-------------------|------------------|-----------------------|----------------------|----------------------------|---------------------------|------------------------|-----------------------|
| 1   | H2_Letter-Number Span | P_Letter-Number Span | H2_Verbal learning | P_Verbal learning | H2_Abstraction | P_Abstraction | H2_Face memory | P_Face memory | H2_Spatial memory | P_Spatial memory | H2_Spatial processing | P_Spatial processing | H2_Sensori-motor dexterity | P_Sensori-motor dexterity | H2_Emotion recognition | P_Emotion recognition |
| 794 | 1.11%                 | 0.06                 | 0.90%              | 0.086             | 0.20%          | 0.4           | 0.44%          | 0.2           | 0.00%             | 0.91             | 0.13%                 | 0.56                 | 0.18%                      | 0.5                       | 0.02%                  | 0.8                   |
| 795 |                       |                      |                    |                   |                |               |                |               |                   |                  |                       |                      |                            |                           |                        |                       |
| 796 | 0.38%                 | 0.3                  | 0.09%              | 0.59              | 0.49%          | 0.2           | 0.19%          | 0.4           | 0.00%             | 1                | 0.66%                 | 0.17                 | 0.10%                      | 0.6                       | 0.06%                  | 0.7                   |
| 797 | 0.30%                 | 0.3                  | 0.01%              | 0.86              | 0.49%          | 0.2           | 0.09%          | 0.6           | 0.01%             | 0.83             | 0.21%                 | 0.42                 | 0.11%                      | 0.6                       | 0.08%                  | 0.6                   |
| 798 | 0.47%                 | 0.2                  | 0.00%              | 0.93              | 0.38%          | 0.2           | 0.21%          | 0.4           | 0.05%             | 0.67             | 2.53%                 | 0.006                | 0.09%                      | 0.6                       | 0.00%                  | 0.9                   |
| 799 | 0.00%                 | 0.9                  | 0.09%              | 0.59              | 0.38%          | 0.3           | 0.86%          | 0.11          | 0.08%             | 0.62             | 0.40%                 | 0.29                 | 0.03%                      | 0.8                       | 0.65%                  | 0.13                  |
| 800 | 0.51%                 | 0.2                  | 1.05%              | 0.079             | 0.00%          | 1             | 0.98%          | 0.05          | 0.10%             | 0.6              | 0.09%                 | 0.62                 | 0.03%                      | 0.7                       | 0.17%                  | 0.5                   |
| 801 | 0.71%                 | 0.15                 | 0.42%              | 0.19              | 0.26%          | 0.4           | 0.02%          | 0.8           | 0.46%             | 0.21             | 0.88%                 | 0.101                | 0.07%                      | 0.6                       | 0.52%                  | 0.2                   |
| 802 | 0.02%                 | 0.8                  | 0.14%              | 0.47              | 0.48%          | 0.2           | 0.04%          | 0.7           | 0.00%             | 0.94             | 0.17%                 | 0.46                 | 0.10%                      | 0.5                       | 0.04%                  | 0.7                   |
| 803 | 0.01%                 | 0.9                  | 0.06%              | 0.63              | 0.10%          | 0.5           | 0.32%          | 0.3           | 0.00%             | 0.93             | 0.03%                 | 0.76                 | 0.01%                      | 0.9                       | 0.01%                  | 0.8                   |
| 804 | 0.02%                 | 0.8                  | 0.25%              | 0.35              | 0.79%          | 0.1           | 0.03%          | 0.8           | 0.02%             | 0.78             | 0.18%                 | 0.47                 | 0.00%                      | 1                         | 0.13%                  | 0.5                   |
| 805 | 0.14%                 | 0.5                  | 0.19%              | 0.42              | 0.12%          | 0.5           | 0.07%          | 0.6           | 0.00%             | 0.94             | 0.57%                 | 0.2                  | 0.09%                      | 0.6                       | 0.05%                  | 0.7                   |
| 806 | 0.05%                 | 0.7                  | 0.08%              | 0.6               | 0.29%          | 0.3           | 0.06%          | 0.6           | 0.05%             | 0.68             | 0.54%                 | 0.21                 | 0.43%                      | 0.2                       | 0.08%                  | 0.6                   |
| 807 | 0.17%                 | 0.4                  | 0.03%              | 0.7               | 0.54%          | 0.12          | 0.13%          | 0.4           | 0.05%             | 0.67             | 0.53%                 | 0.2                  | 1.28%                      | 0.02                      | 0.07%                  | 0.6                   |
| 808 | 0.03%                 | 0.8                  | 0.02%              | 0.82              | 0.97%          | 0.07          | 0.00%          | 1             | 0.45%             | 0.23             | 0.03%                 | 0.78                 | 0.38%                      | 0.3                       | 0.01%                  | 0.9                   |
| 809 | 0.01%                 | 0.9                  | 0.35%              | 0.26              | 0.10%          | 0.6           | 0.15%          | 0.5           | 0.01%             | 0.85             | 0.06%                 | 0.66                 | 0.51%                      | 0.2                       | 0.22%                  | 0.4                   |
| 810 | 0.00%                 | 1                    | 0.03%              | 0.73              | 0.06%          | 0.6           | 0.02%          | 0.8           | 0.06%             | 0.65             | 0.43%                 | 0.24                 | 0.04%                      | 0.7                       | 0.23%                  | 0.4                   |
| 811 | 0.01%                 | 0.8                  | 0.74%              | 0.113             | 0.00%          | 1             | 0.50%          | 0.2           | 0.09%             | 0.6              | 0.06%                 | 0.68                 | 0.06%                      | 0.6                       | 0.01%                  | 0.9                   |
| 812 | 0.03%                 | 0.7                  | 0.02%              | 0.78              | 0.40%          | 0.2           | 0.63%          | 0.14          | 0.01%             | 0.88             | 0.00%                 | 0.94                 | 0.60%                      | 0.2                       | 0.31%                  | 0.3                   |
| 813 | 0.30%                 | 0.3                  | 0.96%              | 0.082             | 0.05%          | 0.7           | 0.34%          | 0.3           | 0.00%             | 0.98             | 0.12%                 | 0.56                 | 0.43%                      | 0.3                       | 0.05%                  | 0.7                   |
| 814 | 0.03%                 | 0.7                  | 0.00%              | 0.91              | 0.02%          | 0.8           | 0.06%          | 0.6           | 0.04%             | 0.72             | 0.02%                 | 0.82                 | 0.01%                      | 0.8                       | 0.00%                  | 1                     |
| 815 | 0.46%                 | 0.2                  | 0.08%              | 0.58              | 0.03%          | 0.7           | 0.07%          | 0.6           | 0.13%             | 0.51             | 0.42%                 | 0.25                 | 0.61%                      | 0.15                      | 0.02%                  | 0.8                   |
| 816 | 0.20%                 | 0.4                  | 0.26%              | 0.34              | 0.27%          | 0.3           | 0.22%          | 0.4           | 0.02%             | 0.8              | 0.07%                 | 0.65                 | 0.75%                      | 0.12                      | 0.19%                  | 0.4                   |
| 817 | 0.01%                 | 0.9                  | 0.11%              | 0.54              | 0.05%          | 0.7           | 0.05%          | 0.7           | 0.28%             | 0.34             | 0.03%                 | 0.74                 | 0.21%                      | 0.4                       | 0.01%                  | 0.8                   |
| 818 | 0.84%                 | 0.09                 | 0.56%              | 0.16              | 0.13%          | 0.5           | 0.52%          | 0.2           | 0.00%             | 0.96             | 0.02%                 | 0.82                 | 0.02%                      | 0.8                       | 0.86%                  | 0.1                   |
| 819 | 0.06%                 | 0.6                  | 0.03%              | 0.76              | 0.01%          | 0.9           | 0.00%          | 0.9           | 0.83%             | 0.109            | 0.66%                 | 0.18                 | 0.04%                      | 0.7                       | 0.47%                  | 0.2                   |
| 820 | 0.10%                 | 0.5                  | 0.61%              | 0.13              | 0.47%          | 0.2           | 1.14%          | 0.05          | 0.01%             | 0.87             | 0.07%                 | 0.65                 | 0.22%                      | 0.4                       | 0.26%                  | 0.3                   |
| 821 | 0.02%                 | 0.8                  | 0.00%              | 0.95              | 0.84%          | 0.07          | 0.00%          | 0.9           | 0.16%             | 0.47             | 0.60%                 | 0.18                 | 0.01%                      | 0.9                       | 1.14%                  | 0.05                  |
| 822 | 0.03%                 | 0.7                  | 0.02%              | 0.79              | 0.01%          | 0.8           | 0.06%          | 0.6           | 0.33%             | 0.3              | 0.89%                 | 0.116                | 0.01%                      | 0.9                       | 0.46%                  | 0.2                   |
| 823 | 0.56%                 | 0.2                  | 0.26%              | 0.33              | 0.50%          | 0.2           | 1.51%          | 0.03          | 0.00%             | 0.94             | 0.24%                 | 0.38                 | 0.20%                      | 0.4                       | 0.19%                  | 0.4                   |
| 824 | 0.02%                 | 0.8                  | 0.14%              | 0.49              | 0.27%          | 0.3           | 0.53%          | 0.2           | 0.18%             | 0.46             | 0.05%                 | 0.72                 | 0.18%                      | 0.5                       | 0.04%                  | 0.7                   |
| 825 | 0.07%                 | 0.6                  | 0.00%              | 0.96              | 0.00%          | 0.9           | 0.03%          | 0.8           | 0.01%             | 0.85             | 0.17%                 | 0.48                 | 0.10%                      | 0.6                       | 0.03%                  | 0.8                   |
| 826 | 0.21%                 | 0.4                  | 0.04%              | 0.7               | 0.01%          | 0.9           | 0.02%          | 0.8           | 0.01%             | 0.87             | 0.07%                 | 0.66                 | 0.73%                      | 0.13                      | 0.34%                  | 0.3                   |

|     | A   | B    | C          | D             | E             | F                      | G                | H                | I                      | J                     | K                  | L                 | M              | N             | O                         | P                        |
|-----|-----|------|------------|---------------|---------------|------------------------|------------------|------------------|------------------------|-----------------------|--------------------|-------------------|----------------|---------------|---------------------------|--------------------------|
| 1   | Chr | Gene | SNP ID     | Position (bp) | Position (cM) | Minor allele frequency | Hardy-Weinberg P | Reference allele | H2_Prepulse inhibition | P_Prepulse inhibition | H2_P50 suppression | P_P50 suppression | H2_Antisaccade | P_Antisaccade | H2_Continuous performance | P_Continuous performance |
| 827 | 8   | NRG1 | rs12680804 | 32235936      | 67.84         | 0.17                   | 0.184            | C                | 0.34%                  | 0.33                  | 0.57%              | 0.3               | 0.34%          | 0.3           | 0.84%                     | 0.105                    |
| 828 | 8   | NRG1 | rs1531746  | 32238717      | 67.85         | 0.38                   | 0.286            | T                | 1.03%                  | 0.084                 | 0.03%              | 0.8               | 0.06%          | 0.66          | 0.03%                     | 0.77                     |
| 829 | 8   | NRG1 | rs1481758  | 32251340      | 67.86         | 0.22                   | 0.835            | C                | 0.11%                  | 0.57                  | 0.54%              | 0.2               | 0.55%          | 0.19          | 0.88%                     | 0.086                    |
| 830 | 8   | NRG1 | rs7822564  | 32252424      | 67.86         | 0.29                   | 0.485            | A                | 2.79%                  | 0.0049                | 0.30%              | 0.4               | 0.01%          | 0.83          | 0.00%                     | 0.99                     |
| 831 | 8   | NRG1 | rs901561   | 32263004      | 67.86         | 0.31                   | 1.000            | A                | 2.36%                  | 0.0087                | 0.73%              | 0.2               | 0.04%          | 0.71          | 0.01%                     | 0.89                     |
| 832 | 8   | NRG1 | rs11782374 | 32269498      | 67.87         | 0.14                   | 0.218            | C                | 1.10%                  | 0.069                 | 0.00%              | 1                 | 0.03%          | 0.78          | 0.06%                     | 0.66                     |
| 833 | 8   | NRG1 | rs10503903 | 32272475      | 67.87         | 0.06                   | 1.000            | T                | 0.12%                  | 0.53                  | 0.44%              | 0.3               | 0.09%          | 0.56          | 0.00%                     | 0.96                     |
| 834 | 8   | NRG1 | rs7818821  | 32272706      | 67.87         | 0.34                   | 1.000            | A                | 2.14%                  | 0.0125                | 0.01%              | 0.9               | 0.07%          | 0.65          | 0.47%                     | 0.22                     |
| 835 | 8   | NRG1 | rs10503904 | 32284229      | 67.88         | 0.13                   | 0.547            | A                | 0.05%                  | 0.71                  | 0.23%              | 0.4               | 0.08%          | 0.61          | 0.71%                     | 0.128                    |
| 836 | 8   | NRG1 | rs7005124  | 32287272      | 67.88         | 0.38                   | 0.064            | T                | 1.34%                  | 0.048                 | 0.02%              | 0.8               | 0.34%          | 0.29          | 0.01%                     | 0.88                     |
| 837 | 8   | NRG1 | rs10503905 | 32287870      | 67.88         | 0.04                   | 1.000            | C                | 0.04%                  | 0.73                  | 0.06%              | 0.7               | 0.82%          | 0.109         | 0.49%                     | 0.22                     |
| 838 | 8   | NRG1 | rs4317533  | 32290309      | 67.89         | 0.43                   | 0.453            | G                | 0.85%                  | 0.118                 | 0.31%              | 0.4               | 0.16%          | 0.47          | 0.20%                     | 0.41                     |
| 839 | 8   | NRG1 | rs10503906 | 32291504      | 67.89         | 0.15                   | 0.772            | G                | 0.06%                  | 0.67                  | 0.00%              | 0.9               | 0.53%          | 0.19          | 1.72%                     | 0.017                    |
| 840 | 8   | NRG1 | rs10503907 | 32291552      | 67.89         | 0.30                   | 0.080            | A                | 1.51%                  | 0.031                 | 0.71%              | 0.2               | 0.50%          | 0.2           | 0.15%                     | 0.47                     |
| 841 | 8   | NRG1 | rs1545961  | 32292898      | 67.89         | 0.35                   | 0.079            | C                | 1.56%                  | 0.032                 | 0.10%              | 0.6               | 0.14%          | 0.5           | 0.38%                     | 0.25                     |
| 842 | 8   | NRG1 | rs1948098  | 32304474      | 67.90         | 0.31                   | 0.233            | A                | 1.14%                  | 0.065                 | 0.00%              | 1                 | 0.90%          | 0.081         | 0.03%                     | 0.73                     |
| 843 | 8   | NRG1 | rs2008626  | 32308921      | 67.90         | 0.06                   | 1.000            | T                | 0.90%                  | 0.106                 | 0.05%              | 0.7               | 0.16%          | 0.46          | 0.31%                     | 0.29                     |
| 844 | 8   | NRG1 | rs1565031  | 32320677      | 67.91         | 0.16                   | 0.177            | G                | 0.38%                  | 0.29                  | 0.05%              | 0.7               | 0.30%          | 0.32          | 0.52%                     | 0.19                     |
| 845 | 8   | NRG1 | rs10091429 | 32324547      | 67.91         | 0.43                   | 0.883            | C                | 0.52%                  | 0.22                  | 0.03%              | 0.8               | 0.19%          | 0.45          | 0.00%                     | 0.94                     |
| 846 | 8   | NRG1 | rs1714420  | 32340954      | 67.93         | 0.12                   | 0.170            | T                | 0.02%                  | 0.79                  | 0.20%              | 0.5               | 0.23%          | 0.38          | 0.00%                     | 0.96                     |
| 847 | 8   | NRG1 | rs6468099  | 32346583      | 67.93         | 0.26                   | 0.855            | G                | 0.05%                  | 0.68                  | 1.71%              | 0.03              | 0.15%          | 0.46          | 0.19%                     | 0.4                      |
| 848 | 8   | NRG1 | rs6992907  | 32347468      | 67.93         | 0.44                   | 0.658            | T                | 0.39%                  | 0.27                  | 0.10%              | 0.6               | 0.56%          | 0.16          | 0.01%                     | 0.85                     |
| 849 | 8   | NRG1 | rs10503913 | 32353655      | 67.94         | 0.18                   | 1.000            | A                | 0.05%                  | 0.72                  | 0.50%              | 0.2               | 0.12%          | 0.54          | 0.12%                     | 0.52                     |
| 850 | 8   | NRG1 | rs2347508  | 32358707      | 67.94         | 0.09                   | 0.626            | C                | 0.74%                  | 0.139                 | 0.00%              | 1                 | 0.09%          | 0.6           | 0.04%                     | 0.72                     |
| 851 | 8   | NRG1 | rs2347509  | 32360960      | 67.94         | 0.06                   | 1.000            | T                | 0.28%                  | 0.36                  | 0.20%              | 0.5               | 0.17%          | 0.46          | 0.06%                     | 0.65                     |
| 852 | 8   | NRG1 | rs4373483  | 32361621      | 67.94         | 0.43                   | 0.234            | A                | 0.01%                  | 0.88                  | 0.16%              | 0.5               | 0.09%          | 0.6           | 0.08%                     | 0.61                     |
| 853 | 8   | NRG1 | rs6986716  | 32367281      | 67.95         | 0.20                   | 0.632            | C                | 0.02%                  | 0.8                   | 0.48%              | 0.2               | 0.40%          | 0.25          | 0.03%                     | 0.76                     |
| 854 | 8   | NRG1 | rs10101959 | 32372076      | 67.95         | 0.28                   | 0.154            | G                | 0.00%                  | 0.99                  | 0.37%              | 0.3               | 0.09%          | 0.61          | 0.05%                     | 0.68                     |
| 855 | 8   | NRG1 | rs10503914 | 32400369      | 67.98         | 0.13                   | 0.541            | T                | 0.38%                  | 0.28                  | 1.52%              | 0.05              | 0.39%          | 0.26          | 0.03%                     | 0.76                     |
| 856 | 8   | NRG1 | rs9918832  | 32402139      | 67.98         | 0.24                   | 0.304            | T                | 0.12%                  | 0.52                  | 0.03%              | 0.8               | 0.01%          | 0.84          | 0.04%                     | 0.7                      |
| 857 | 8   | NRG1 | rs11782671 | 32410143      | 67.98         | 0.38                   | 0.535            | C                | 0.37%                  | 0.29                  | 0.21%              | 0.5               | 0.03%          | 0.77          | 0.02%                     | 0.79                     |
| 858 | 8   | NRG1 | rs2347501  | 32413693      | 67.99         | 0.28                   | 1.000            | C                | 0.69%                  | 0.16                  | 0.01%              | 0.9               | 0.08%          | 0.6           | 0.01%                     | 0.86                     |
| 859 | 8   | NRG1 | rs10103930 | 32425497      | 68.00         | 0.45                   | 0.030            | A                | 0.07%                  | 0.65                  | 0.42%              | 0.3               | 0.35%          | 0.29          | 0.26%                     | 0.35                     |

|     | Q                     | R                    | S                  | T                 | U              | V             | W              | X             | Y                 | Z                | AA                    | AB                   | AC                         | AD                        | AE                     | AF                    |
|-----|-----------------------|----------------------|--------------------|-------------------|----------------|---------------|----------------|---------------|-------------------|------------------|-----------------------|----------------------|----------------------------|---------------------------|------------------------|-----------------------|
| 1   | H2_Letter-Number Span | P_Letter-Number Span | H2_Verbal learning | P_Verbal learning | H2_Abstraction | P_Abstraction | H2_Face memory | P_Face memory | H2_Spatial memory | P_Spatial memory | H2_Spatial processing | P_Spatial processing | H2_Sensori-motor dexterity | P_Sensori-motor dexterity | H2_Emotion recognition | P_Emotion recognition |
| 827 | 0.78%                 | 0.11                 | 0.00%              | 0.98              | 0.17%          | 0.5           | 0.00%          | 0.9           | 0.11%             | 0.57             | 0.27%                 | 0.39                 | 0.05%                      | 0.7                       | 0.03%                  | 0.8                   |
| 828 | 0.11%                 | 0.5                  | 0.00%              | 0.98              | 0.01%          | 0.8           | 0.13%          | 0.5           | 0.40%             | 0.27             | 0.51%                 | 0.23                 | 0.05%                      | 0.7                       | 0.20%                  | 0.4                   |
| 829 | 0.75%                 | 0.1                  | 0.69%              | 0.114             | 0.08%          | 0.6           | 0.77%          | 0.1           | 0.05%             | 0.67             | 0.34%                 | 0.3                  | 0.12%                      | 0.5                       | 0.17%                  | 0.4                   |
| 830 | 0.18%                 | 0.4                  | 0.27%              | 0.34              | 0.07%          | 0.6           | 0.01%          | 0.9           | 0.04%             | 0.72             | 0.04%                 | 0.72                 | 0.24%                      | 0.4                       | 0.62%                  | 0.2                   |
| 831 | 0.06%                 | 0.6                  | 0.07%              | 0.62              | 0.07%          | 0.6           | 0.00%          | 0.9           | 0.00%             | 0.92             | 0.00%                 | 0.9                  | 0.01%                      | 0.8                       | 0.27%                  | 0.3                   |
| 832 | 1.15%                 | 0.05                 | 0.39%              | 0.25              | 0.02%          | 0.8           | 0.82%          | 0.09          | 0.00%             | 0.98             | 0.60%                 | 0.19                 | 0.39%                      | 0.3                       | 0.96%                  | 0.08                  |
| 833 | 0.78%                 | 0.1                  | 0.34%              | 0.26              | 0.00%          | 0.9           | 0.51%          | 0.2           | 0.11%             | 0.53             | 0.00%                 | 0.95                 | 0.01%                      | 0.9                       | 0.03%                  | 0.7                   |
| 834 | 0.31%                 | 0.3                  | 0.55%              | 0.17              | 0.16%          | 0.4           | 0.24%          | 0.3           | 0.01%             | 0.83             | 0.08%                 | 0.64                 | 0.00%                      | 1                         | 0.71%                  | 0.13                  |
| 835 | 0.11%                 | 0.5                  | 0.03%              | 0.76              | 0.02%          | 0.8           | 0.19%          | 0.4           | 0.32%             | 0.31             | 0.00%                 | 0.99                 | 0.00%                      | 1                         | 0.06%                  | 0.7                   |
| 836 | 0.03%                 | 0.8                  | 0.01%              | 0.82              | 0.07%          | 0.6           | 0.01%          | 0.8           | 0.09%             | 0.58             | 0.00%                 | 0.95                 | 0.68%                      | 0.14                      | 0.09%                  | 0.6                   |
| 837 | 0.31%                 | 0.3                  | 0.04%              | 0.72              | 0.20%          | 0.4           | 0.10%          | 0.6           | 0.65%             | 0.143            | 0.02%                 | 0.81                 | 0.00%                      | 0.9                       | 0.02%                  | 0.8                   |
| 838 | 0.02%                 | 0.8                  | 0.12%              | 0.51              | 0.01%          | 0.9           | 0.03%          | 0.7           | 0.00%             | 0.95             | 0.04%                 | 0.74                 | 0.16%                      | 0.5                       | 0.04%                  | 0.7                   |
| 839 | 0.03%                 | 0.7                  | 0.01%              | 0.89              | 0.06%          | 0.6           | 0.69%          | 0.12          | 0.08%             | 0.6              | 0.09%                 | 0.59                 | 0.78%                      | 0.1                       | 1.40%                  | 0.03                  |
| 840 | 0.04%                 | 0.7                  | 0.06%              | 0.63              | 0.56%          | 0.15          | 0.00%          | 1             | 0.86%             | 0.08             | 0.01%                 | 0.84                 | 0.34%                      | 0.3                       | 0.00%                  | 1                     |
| 841 | 0.47%                 | 0.2                  | 0.21%              | 0.38              | 0.05%          | 0.7           | 0.02%          | 0.8           | 0.02%             | 0.8              | 0.14%                 | 0.5                  | 0.06%                      | 0.7                       | 0.24%                  | 0.3                   |
| 842 | 0.01%                 | 0.8                  | 0.48%              | 0.18              | 0.37%          | 0.2           | 0.08%          | 0.6           | 0.00%             | 0.99             | 0.20%                 | 0.42                 | 0.03%                      | 0.7                       | 0.94%                  | 0.07                  |
| 843 | 0.02%                 | 0.8                  | 0.30%              | 0.28              | 0.03%          | 0.8           | 0.33%          | 0.3           | 0.02%             | 0.81             | 0.42%                 | 0.25                 | 0.28%                      | 0.3                       | 0.04%                  | 0.7                   |
| 844 | 0.29%                 | 0.3                  | 0.16%              | 0.45              | 0.00%          | 1             | 0.19%          | 0.4           | 0.42%             | 0.25             | 0.39%                 | 0.28                 | 0.03%                      | 0.8                       | 0.01%                  | 0.8                   |
| 845 | 0.56%                 | 0.2                  | 0.02%              | 0.81              | 0.65%          | 0.14          | 0.01%          | 0.9           | 0.07%             | 0.63             | 0.00%                 | 0.91                 | 0.01%                      | 0.9                       | 0.47%                  | 0.2                   |
| 846 | 0.00%                 | 1                    | 0.07%              | 0.62              | 1.24%          | 0.04          | 0.51%          | 0.2           | 0.01%             | 0.85             | 0.41%                 | 0.29                 | 0.03%                      | 0.7                       | 0.46%                  | 0.2                   |
| 847 | 0.05%                 | 0.7                  | 0.06%              | 0.63              | 0.13%          | 0.5           | 0.09%          | 0.6           | 0.75%             | 0.104            | 0.05%                 | 0.68                 | 0.66%                      | 0.13                      | 0.54%                  | 0.2                   |
| 848 | 0.01%                 | 0.9                  | 0.01%              | 0.84              | 0.03%          | 0.8           | 0.04%          | 0.7           | 0.05%             | 0.66             | 0.10%                 | 0.56                 | 0.02%                      | 0.8                       | 0.14%                  | 0.5                   |
| 849 | 0.11%                 | 0.5                  | 0.02%              | 0.78              | 0.05%          | 0.7           | 0.25%          | 0.3           | 0.16%             | 0.46             | 0.26%                 | 0.35                 | 0.00%                      | 0.9                       | 0.15%                  | 0.5                   |
| 850 | 0.06%                 | 0.7                  | 0.30%              | 0.29              | 0.00%          | 1             | 0.36%          | 0.3           | 0.44%             | 0.23             | 0.25%                 | 0.38                 | 0.03%                      | 0.8                       | 0.04%                  | 0.7                   |
| 851 | 0.03%                 | 0.8                  | 0.01%              | 0.83              | 0.44%          | 0.2           | 0.06%          | 0.6           | 0.00%             | 1                | 0.11%                 | 0.57                 | 0.15%                      | 0.5                       | 0.06%                  | 0.6                   |
| 852 | 0.19%                 | 0.4                  | 0.63%              | 0.144             | 0.02%          | 0.8           | 0.42%          | 0.2           | 0.00%             | 0.9              | 0.06%                 | 0.67                 | 0.37%                      | 0.3                       | 0.30%                  | 0.3                   |
| 853 | 0.02%                 | 0.8                  | 0.08%              | 0.58              | 0.21%          | 0.4           | 0.21%          | 0.4           | 0.07%             | 0.62             | 0.00%                 | 0.99                 | 0.20%                      | 0.4                       | 0.08%                  | 0.6                   |
| 854 | 0.08%                 | 0.6                  | 0.14%              | 0.48              | 0.00%          | 0.9           | 0.12%          | 0.5           | 0.23%             | 0.4              | 0.13%                 | 0.54                 | 0.72%                      | 0.13                      | 0.21%                  | 0.4                   |
| 855 | 0.21%                 | 0.4                  | 0.60%              | 0.142             | 0.42%          | 0.2           | 1.61%          | 0.02          | 0.62%             | 0.15             | 0.47%                 | 0.22                 | 0.07%                      | 0.6                       | 0.15%                  | 0.5                   |
| 856 | 0.02%                 | 0.8                  | 0.02%              | 0.76              | 0.36%          | 0.2           | 0.01%          | 0.9           | 0.15%             | 0.47             | 0.25%                 | 0.37                 | 0.02%                      | 0.8                       | 0.08%                  | 0.6                   |
| 857 | 0.01%                 | 0.8                  | 0.28%              | 0.31              | 0.32%          | 0.3           | 0.01%          | 0.8           | 0.07%             | 0.63             | 0.01%                 | 0.83                 | 0.23%                      | 0.4                       | 0.20%                  | 0.4                   |
| 858 | 0.06%                 | 0.6                  | 0.03%              | 0.73              | 0.46%          | 0.2           | 0.01%          | 0.8           | 0.00%             | 0.97             | 0.12%                 | 0.53                 | 0.05%                      | 0.7                       | 0.28%                  | 0.3                   |
| 859 | 0.55%                 | 0.2                  | 0.61%              | 0.14              | 1.63%          | 0.02          | 0.28%          | 0.3           | 0.92%             | 0.083            | 0.21%                 | 0.43                 | 0.83%                      | 0.1                       | 0.57%                  | 0.2                   |

|     | A   | B    | C          | D             | E             | F                      | G                | H                | I                      | J                     | K                  | L                 | M              | N             | O                         | P                        |
|-----|-----|------|------------|---------------|---------------|------------------------|------------------|------------------|------------------------|-----------------------|--------------------|-------------------|----------------|---------------|---------------------------|--------------------------|
| 1   | Chr | Gene | SNP ID     | Position (bp) | Position (cM) | Minor allele frequency | Hardy-Weinberg P | Reference allele | H2_Prepulse inhibition | P_Prepulse inhibition | H2_P50 suppression | P_P50 suppression | H2_Antisaccade | P_Antisaccade | H2_Continuous performance | P_Continuous performance |
| 860 | 8   | NRG1 | rs7842667  | 32446897      | 68.01         | 0.23                   | 0.021            | C                | 0.11%                  | 0.56                  | 0.06%              | 0.7               | 0.52%          | 0.2           | 0.08%                     | 0.61                     |
| 861 | 8   | NRG1 | rs7001605  | 32466789      | 68.03         | 0.37                   | 0.210            | C                | 0.21%                  | 0.42                  | 0.11%              | 0.6               | 0.01%          | 0.9           | 0.00%                     | 0.99                     |
| 862 | 8   | NRG1 | rs4733342  | 32468778      | 68.03         | 0.13                   | 0.318            | T                | 0.08%                  | 0.6                   | 0.15%              | 0.5               | 0.26%          | 0.34          | 0.14%                     | 0.48                     |
| 863 | 8   | NRG1 | rs7844425  | 32495159      | 68.05         | 0.33                   | 0.507            | T                | 0.17%                  | 0.46                  | 0.41%              | 0.3               | 0.44%          | 0.22          | 0.04%                     | 0.71                     |
| 864 | 8   | NRG1 | rs4733348  | 32496353      | 68.05         | 0.18                   | 0.479            | C                | 0.18%                  | 0.46                  | 0.66%              | 0.2               | 0.00%          | 0.91          | 0.00%                     | 0.95                     |
| 865 | 8   | NRG1 | rs10113593 | 32510900      | 68.06         | 0.04                   | 0.311            | T                | 0.32%                  | 0.33                  | 0.14%              | 0.5               | 0.65%          | 0.16          | 1.24%                     | 0.04                     |
| 866 | 8   | NRG1 | rs10503919 | 32519284      | 68.06         | 0.16                   | 0.269            | C                | 0.00%                  | 0.92                  | 0.06%              | 0.7               | 0.57%          | 0.21          | 0.22%                     | 0.41                     |
| 867 | 8   | NRG1 | rs7000590  | 32520170      | 68.06         | 0.27                   | 0.198            | C                | 0.15%                  | 0.51                  | 0.31%              | 0.4               | 0.06%          | 0.68          | 0.01%                     | 0.88                     |
| 868 | 8   | NRG1 | rs4733130  | 32526536      | 68.06         | 0.47                   | 0.244            | T                | 0.27%                  | 0.36                  | 0.00%              | 0.9               | 1.34%          | 0.039         | 0.30%                     | 0.31                     |
| 869 | 8   | NRG1 | rs2439312  | 32531901      | 68.07         | 0.22                   | 0.287            | C                | 0.01%                  | 0.84                  | 0.38%              | 0.3               | 0.37%          | 0.27          | 0.00%                     | 0.96                     |
| 870 | 8   | NRG1 | rs11776203 | 32538661      | 68.07         | 0.26                   | 0.460            | T                | 0.64%                  | 0.16                  | 0.19%              | 0.5               | 1.69%          | 0.021         | 0.02%                     | 0.81                     |
| 871 | 8   | NRG1 | rs10104033 | 32542822      | 68.07         | 0.39                   | 1.000            | G                | 0.11%                  | 0.56                  | 0.14%              | 0.5               | 0.23%          | 0.39          | 0.05%                     | 0.68                     |
| 872 | 8   | NRG1 | rs10503920 | 32548231      | 68.07         | 0.33                   | 0.745            | A                | 0.02%                  | 0.79                  | 0.00%              | 1                 | 0.85%          | 0.104         | 0.16%                     | 0.47                     |
| 873 | 8   | NRG1 | rs7826436  | 32559476      | 68.08         | 0.28                   | 0.710            | G                | 0.13%                  | 0.53                  | 0.07%              | 0.7               | 0.06%          | 0.65          | 0.59%                     | 0.15                     |
| 874 | 8   | NRG1 | rs10503921 | 32560877      | 68.08         | 0.26                   | 0.844            | T                | 0.07%                  | 0.64                  | 0.00%              | 1                 | 0.00%          | 0.96          | 0.61%                     | 0.145                    |
| 875 | 8   | NRG1 | rs3924999  | 32572900      | 68.09         | 0.34                   | 0.419            | C                | 0.56%                  | 0.21                  | 0.00%              | 1                 | 0.45%          | 0.24          | 0.23%                     | 0.39                     |
| 876 | 8   | NRG1 | rs10954864 | 32581039      | 68.10         | 0.48                   | 0.390            | C                | 0.81%                  | 0.133                 | 0.00%              | 1                 | 0.15%          | 0.5           | 0.02%                     | 0.78                     |
| 877 | 8   | NRG1 | rs2439282  | 32582243      | 68.11         | 0.10                   | 0.700            | G                | 0.05%                  | 0.72                  | 0.84%              | 0.12              | 0.02%          | 0.82          | 0.11%                     | 0.55                     |
| 878 | 8   | NRG1 | rs2439281  | 32585096      | 68.12         | 0.45                   | 0.883            | G                | 0.85%                  | 0.1                   | 1.53%              | 0.05              | 0.10%          | 0.57          | 0.05%                     | 0.69                     |
| 879 | 8   | NRG1 | rs6996203  | 32587559      | 68.13         | 0.07                   | 1.000            | A                | 1.01%                  | 0.092                 | 0.00%              | 1                 | 0.08%          | 0.63          | 0.23%                     | 0.37                     |
| 880 | 8   | NRG1 | rs12547858 | 32606595      | 68.20         | 0.20                   | 0.823            | C                | 0.37%                  | 0.29                  | 0.01%              | 0.9               | 0.00%          | 0.97          | 0.35%                     | 0.28                     |
| 881 | 8   | NRG1 | rs2439273  | 32609852      | 68.21         | 0.16                   | 0.118            | T                | 0.33%                  | 0.33                  | 0.62%              | 0.2               | 0.21%          | 0.42          | 0.12%                     | 0.52                     |
| 882 | 8   | NRG1 | rs10098373 | 32612127      | 68.22         | 0.48                   | 0.247            | C                | 0.04%                  | 0.7                   | 0.29%              | 0.4               | 0.07%          | 0.6           | 0.16%                     | 0.43                     |
| 883 | 8   | NRG1 | rs13259346 | 32630548      | 68.29         | 0.49                   | 0.469            | C                | 0.04%                  | 0.73                  | 1.25%              | 0.07              | 0.15%          | 0.49          | 0.48%                     | 0.21                     |
| 884 | 8   | NRG1 | rs2466052  | 32631182      | 68.29         | 0.06                   | 0.053            | T                | 0.92%                  | 0.101                 | 0.08%              | 0.7               | 0.48%          | 0.2           | 0.21%                     | 0.41                     |
| 885 | 8   | NRG1 | rs2466046  | 32636704      | 68.31         | 0.45                   | 0.554            | T                | 0.08%                  | 0.63                  | 0.81%              | 0.14              | 0.11%          | 0.55          | 0.51%                     | 0.19                     |
| 886 | 8   | NRG1 | rs2439324  | 32638195      | 68.31         | 0.04                   | 1.000            | G                | 0.45%                  | 0.25                  | 0.21%              | 0.4               | 0.06%          | 0.65          | 0.09%                     | 0.58                     |
| 887 | 8   | NRG1 | rs6468122  | 32658869      | 68.39         | 0.35                   | 0.753            | C                | 0.08%                  | 0.61                  | 0.01%              | 0.9               | 0.26%          | 0.34          | 0.13%                     | 0.48                     |
| 888 | 8   | NRG1 | rs9297195  | 32658983      | 68.39         | 0.10                   | 1.000            | A                | 0.00%                  | 1                     | 0.00%              | 1                 | 0.01%          | 0.89          | 0.71%                     | 0.108                    |
| 889 | 8   | NRG1 | rs4445183  | 32681985      | 68.44         | 0.33                   | 0.147            | C                | 0.01%                  | 0.89                  | 0.76%              | 0.2               | 0.10%          | 0.56          | 0.10%                     | 0.55                     |
| 890 | 8   | NRG1 | rs10095556 | 32686855      | 68.44         | 0.23                   | 0.163            | A                | 0.01%                  | 0.83                  | 0.62%              | 0.2               | 0.01%          | 0.84          | 0.35%                     | 0.26                     |
| 891 | 8   | NRG1 | rs2976525  | 32692525      | 68.44         | 0.13                   | 0.319            | A                | 0.00%                  | 0.94                  | 0.38%              | 0.3               | 0.70%          | 0.121         | 0.05%                     | 0.68                     |
| 892 | 8   | NRG1 | rs7844475  | 32711671      | 68.46         | 0.04                   | 1.000            | T                | 0.04%                  | 0.75                  | 0.04%              | 0.7               | 0.02%          | 0.82          | 0.19%                     | 0.43                     |

|     | Q                     | R                    | S                  | T                 | U              | V             | W              | X             | Y                 | Z                | AA                    | AB                   | AC                         | AD                        | AE                     | AF                    |
|-----|-----------------------|----------------------|--------------------|-------------------|----------------|---------------|----------------|---------------|-------------------|------------------|-----------------------|----------------------|----------------------------|---------------------------|------------------------|-----------------------|
| 1   | H2_Letter-Number Span | P_Letter-Number Span | H2_Verbal learning | P_Verbal learning | H2_Abstraction | P_Abstraction | H2_Face memory | P_Face memory | H2_Spatial memory | P_Spatial memory | H2_Spatial processing | P_Spatial processing | H2_Sensori-motor dexterity | P_Sensori-motor dexterity | H2_Emotion recognition | P_Emotion recognition |
| 860 | 1.12%                 | 0.05                 | 2.25%              | 0.0046            | 2.14%          | 0.008         | 1.06%          | 0.06          | 0.79%             | 0.111            | 0.69%                 | 0.147                | 1.03%                      | 0.07                      | 0.65%                  | 0.14                  |
| 861 | 0.35%                 | 0.3                  | 0.97%              | 0.064             | 1.46%          | 0.03          | 1.01%          | 0.07          | 0.59%             | 0.17             | 0.18%                 | 0.47                 | 1.11%                      | 0.06                      | 0.60%                  | 0.2                   |
| 862 | 0.40%                 | 0.2                  | 0.31%              | 0.28              | 0.11%          | 0.5           | 0.01%          | 0.9           | 0.06%             | 0.65             | 0.13%                 | 0.53                 | 0.00%                      | 0.9                       | 0.00%                  | 0.9                   |
| 863 | 0.81%                 | 0.08                 | 1.03%              | 0.048             | 1.35%          | 0.02          | 0.30%          | 0.3           | 1.00%             | 0.059            | 0.06%                 | 0.67                 | 1.62%                      | 0.02                      | 0.24%                  | 0.4                   |
| 864 | 0.15%                 | 0.5                  | 0.44%              | 0.2               | 0.00%          | 0.9           | 0.08%          | 0.6           | 0.03%             | 0.74             | 0.19%                 | 0.45                 | 0.21%                      | 0.4                       | 0.00%                  | 0.9                   |
| 865 | 0.19%                 | 0.4                  | 0.09%              | 0.57              | 0.53%          | 0.2           | 0.14%          | 0.5           | 0.01%             | 0.89             | 0.01%                 | 0.89                 | 2.62%                      | 0.003                     | 0.75%                  | 0.11                  |
| 866 | 0.00%                 | 0.9                  | 0.00%              | 0.95              | 0.74%          | 0.14          | 0.23%          | 0.4           | 0.12%             | 0.56             | 0.00%                 | 1                    | 0.15%                      | 0.5                       | 0.12%                  | 0.6                   |
| 867 | 1.03%                 | 0.06                 | 2.45%              | 0.0039            | 1.98%          | 0.012         | 0.78%          | 0.11          | 0.61%             | 0.17             | 0.38%                 | 0.3                  | 0.82%                      | 0.11                      | 0.42%                  | 0.3                   |
| 868 | 1.26%                 | 0.03                 | 2.30%              | 0.0039            | 2.18%          | 0.006         | 0.45%          | 0.2           | 1.50%             | 0.027            | 0.11%                 | 0.56                 | 1.90%                      | 0.011                     | 0.41%                  | 0.2                   |
| 869 | 1.01%                 | 0.06                 | 2.40%              | 0.0032            | 1.63%          | 0.02          | 0.10%          | 0.6           | 0.61%             | 0.16             | 0.33%                 | 0.33                 | 0.58%                      | 0.2                       | 0.16%                  | 0.5                   |
| 870 | 1.13%                 | 0.05                 | 3.01%              | 0.00115           | 0.57%          | 0.2           | 0.51%          | 0.2           | 1.62%             | 0.022            | 0.86%                 | 0.111                | 0.89%                      | 0.09                      | 0.00%                  | 0.9                   |
| 871 | 0.06%                 | 0.6                  | 0.08%              | 0.58              | 0.12%          | 0.5           | 0.77%          | 0.09          | 0.02%             | 0.8              | 0.31%                 | 0.33                 | 0.03%                      | 0.8                       | 0.16%                  | 0.5                   |
| 872 | 0.35%                 | 0.3                  | 1.54%              | 0.02              | 1.20%          | 0.04          | 0.00%          | 0.9           | 1.09%             | 0.056            | 0.45%                 | 0.24                 | 0.20%                      | 0.4                       | 0.27%                  | 0.3                   |
| 873 | 0.05%                 | 0.7                  | 0.21%              | 0.38              | 0.41%          | 0.2           | 0.06%          | 0.7           | 0.03%             | 0.77             | 0.02%                 | 0.81                 | 0.32%                      | 0.3                       | 0.08%                  | 0.6                   |
| 874 | 0.06%                 | 0.6                  | 0.12%              | 0.51              | 0.43%          | 0.2           | 0.04%          | 0.7           | 0.08%             | 0.59             | 0.14%                 | 0.51                 | 0.14%                      | 0.5                       | 0.17%                  | 0.4                   |
| 875 | 1.01%                 | 0.06                 | 3.49%              | 0.00056           | 0.13%          | 0.5           | 0.11%          | 0.5           | 0.01%             | 0.88             | 0.21%                 | 0.43                 | 0.05%                      | 0.7                       | 0.28%                  | 0.3                   |
| 876 | 0.19%                 | 0.4                  | 1.47%              | 0.025             | 0.01%          | 0.9           | 0.00%          | 0.9           | 0.94%             | 0.081            | 0.03%                 | 0.75                 | 0.03%                      | 0.8                       | 0.00%                  | 1                     |
| 877 | 0.20%                 | 0.4                  | 0.33%              | 0.28              | 0.14%          | 0.5           | 0.03%          | 0.8           | 0.25%             | 0.37             | 0.14%                 | 0.52                 | 0.39%                      | 0.2                       | 0.02%                  | 0.8                   |
| 878 | 0.59%                 | 0.14                 | 0.06%              | 0.64              | 0.01%          | 0.9           | 0.30%          | 0.3           | 0.28%             | 0.33             | 0.08%                 | 0.61                 | 0.23%                      | 0.4                       | 0.48%                  | 0.2                   |
| 879 | 0.05%                 | 0.7                  | 0.21%              | 0.39              | 0.00%          | 1             | 0.01%          | 0.9           | 0.02%             | 0.8              | 1.59%                 | 0.027                | 0.64%                      | 0.2                       | 0.21%                  | 0.4                   |
| 880 | 0.15%                 | 0.5                  | 0.32%              | 0.29              | 0.05%          | 0.7           | 0.00%          | 0.9           | 0.00%             | 0.98             | 0.04%                 | 0.74                 | 0.01%                      | 0.9                       | 0.00%                  | 0.9                   |
| 881 | 0.04%                 | 0.7                  | 0.80%              | 0.088             | 0.01%          | 0.9           | 0.47%          | 0.2           | 0.30%             | 0.32             | 0.23%                 | 0.42                 | 0.22%                      | 0.4                       | 0.44%                  | 0.2                   |
| 882 | 0.43%                 | 0.2                  | 0.01%              | 0.84              | 0.34%          | 0.2           | 0.00%          | 0.9           | 0.20%             | 0.38             | 1.56%                 | 0.018                | 0.02%                      | 0.8                       | 0.06%                  | 0.6                   |
| 883 | 0.01%                 | 0.9                  | 0.47%              | 0.19              | 0.01%          | 0.9           | 0.28%          | 0.3           | 0.57%             | 0.17             | 0.01%                 | 0.88                 | 0.01%                      | 0.9                       | 0.08%                  | 0.6                   |
| 884 | 0.09%                 | 0.6                  | 0.05%              | 0.69              | 0.65%          | 0.13          | 0.02%          | 0.8           | 0.18%             | 0.44             | 0.17%                 | 0.47                 | 0.02%                      | 0.8                       | 0.04%                  | 0.7                   |
| 885 | 0.11%                 | 0.5                  | 0.20%              | 0.39              | 0.07%          | 0.6           | 0.00%          | 0.9           | 0.41%             | 0.24             | 0.07%                 | 0.65                 | 0.35%                      | 0.3                       | 0.01%                  | 0.8                   |
| 886 | 0.09%                 | 0.6                  | 0.05%              | 0.67              | 0.16%          | 0.5           | 0.00%          | 1             | 0.00%             | 0.9              | 0.02%                 | 0.81                 | 0.50%                      | 0.2                       | 0.05%                  | 0.7                   |
| 887 | 0.72%                 | 0.09                 | 0.18%              | 0.4               | 0.00%          | 1             | 0.17%          | 0.4           | 0.13%             | 0.5              | 0.93%                 | 0.075                | 0.36%                      | 0.2                       | 0.00%                  | 0.9                   |
| 888 | 0.09%                 | 0.6                  | 0.00%              | 0.9               | 0.20%          | 0.4           | 0.00%          | 0.9           | 0.04%             | 0.69             | 0.40%                 | 0.26                 | 0.13%                      | 0.5                       | 0.47%                  | 0.2                   |
| 889 | 0.04%                 | 0.7                  | 0.02%              | 0.77              | 0.50%          | 0.2           | 0.02%          | 0.8           | 0.21%             | 0.4              | 0.17%                 | 0.46                 | 0.06%                      | 0.7                       | 0.00%                  | 0.9                   |
| 890 | 0.42%                 | 0.2                  | 0.14%              | 0.46              | 0.00%          | 0.9           | 0.15%          | 0.5           | 0.29%             | 0.31             | 1.28%                 | 0.039                | 0.00%                      | 0.9                       | 0.10%                  | 0.6                   |
| 891 | 0.01%                 | 0.9                  | 0.26%              | 0.31              | 0.03%          | 0.7           | 0.08%          | 0.6           | 0.00%             | 0.98             | 0.36%                 | 0.3                  | 0.18%                      | 0.4                       | 0.02%                  | 0.8                   |
| 892 | 0.51%                 | 0.2                  | 0.06%              | 0.65              | 0.39%          | 0.3           | 1.55%          | 0.02          | 0.56%             | 0.17             | 0.24%                 | 0.39                 | 0.82%                      | 0.1                       | 0.50%                  | 0.2                   |

|     | A   | B      | C          | D             | E             | F                      | G                | H                | I                      | J                     | K                  | L                 | M              | N             | O                         | P                        |
|-----|-----|--------|------------|---------------|---------------|------------------------|------------------|------------------|------------------------|-----------------------|--------------------|-------------------|----------------|---------------|---------------------------|--------------------------|
| 1   | Chr | Gene   | SNP ID     | Position (bp) | Position (cM) | Minor allele frequency | Hardy-Weinberg P | Reference allele | H2_Prepulse inhibition | P_Prepulse inhibition | H2_P50 suppression | P_P50 suppression | H2_Antisaccade | P_Antisaccade | H2_Continuous performance | P_Continuous performance |
| 893 | 8   | NRG1   | rs2976532  | 32713793      | 68.46         | 0.43                   | 0.380            | G                | 0.12%                  | 0.54                  | 0.00%              | 1                 | 0.06%          | 0.65          | 0.28%                     | 0.33                     |
| 894 | 8   | NRG1   | rs7007436  | 32721934      | 68.47         | 0.31                   | 1.000            | T                | 0.27%                  | 0.37                  | 0.02%              | 0.8               | 0.08%          | 0.6           | 0.37%                     | 0.26                     |
| 895 | 8   | NRG1   | rs4512342  | 32727416      | 68.47         | 0.10                   | 0.403            | T                | 2.13%                  | 0.0063                | 0.19%              | 0.4               | 0.01%          | 0.84          | 0.08%                     | 0.58                     |
| 896 | 8   | NRG1   | rs10503929 | 32733525      | 68.47         | 0.17                   | 0.315            | T                | 0.36%                  | 0.3                   | 0.01%              | 0.9               | 0.24%          | 0.39          | 0.06%                     | 0.65                     |
| 897 | 8   | NRG1   | rs7005288  | 32740009      | 68.48         | 0.22                   | 0.385            | A                | 0.03%                  | 0.75                  | 0.01%              | 0.9               | 1.44%          | 0.032         | 0.68%                     | 0.139                    |
| 898 | 8   | NRG1   | rs3735782  | 32744399      | 68.48         | 0.49                   | 0.386            | C                | 0.09%                  | 0.6                   | 0.07%              | 0.7               | 0.40%          | 0.25          | 0.03%                     | 0.75                     |
| 899 | 8   | NRG1   | rs7812718  | 32746598      | 68.48         | 0.14                   | 1.000            | C                | 0.86%                  | 0.112                 | 0.02%              | 0.8               | 0.19%          | 0.44          | 0.42%                     | 0.25                     |
| 900 | 8   | CHRNA3 | rs1530847  | 42667396      | 78.27         | 0.14                   | 0.209            | T                | 0.08%                  | 0.64                  | 0.00%              | 0.9               | 0.26%          | 0.37          | 0.01%                     | 0.89                     |
| 901 | 8   | CHRNA3 | rs7844824  | 42672170      | 78.27         | 0.04                   | 1.000            | C                | 0.58%                  | 0.25                  | 0.60%              | 0.2               | 0.47%          | 0.22          | 1.04%                     | 0.074                    |
| 902 | 9   | GRIN3A | rs3824473  | 103374598     | 125.22        | 0.27                   | 0.563            | G                | 0.09%                  | 0.6                   | 0.15%              | 0.5               | 0.01%          | 0.88          | 0.01%                     | 0.87                     |
| 903 | 9   | GRIN3A | rs1407877  | 103395276     | 125.25        | 0.13                   | 0.093            | G                | 0.05%                  | 0.7                   | 0.00%              | 0.9               | 1.36%          | 0.038         | 0.54%                     | 0.17                     |
| 904 | 9   | GRIN3A | rs3739724  | 103396260     | 125.25        | 0.14                   | 0.752            | T                | 2.63%                  | 0.0054                | 0.06%              | 0.7               | 0.10%          | 0.57          | 0.02%                     | 0.82                     |
| 905 | 9   | GRIN3A | rs1323432  | 103402758     | 125.26        | 0.13                   | 0.495            | T                | 0.08%                  | 0.62                  | 0.01%              | 0.9               | 0.00%          | 0.94          | 0.10%                     | 0.56                     |
| 906 | 9   | GRIN3A | rs942141   | 103411557     | 125.27        | 0.34                   | 0.329            | C                | 2.98%                  | 0.004                 | 0.94%              | 0.14              | 0.08%          | 0.62          | 0.73%                     | 0.13                     |
| 907 | 9   | GRIN3A | rs10125230 | 103417353     | 125.27        | 0.18                   | 0.631            | A                | 0.51%                  | 0.22                  | 0.05%              | 0.7               | 0.00%          | 0.98          | 0.05%                     | 0.67                     |
| 908 | 9   | GRIN3A | rs12685902 | 103420991     | 125.28        | 0.43                   | 0.767            | T                | 1.38%                  | 0.058                 | 1.04%              | 0.13              | 0.01%          | 0.89          | 0.46%                     | 0.24                     |
| 909 | 9   | GRIN3A | rs2181561  | 103427933     | 125.29        | 0.06                   | 0.180            | T                | 0.00%                  | 0.93                  | 0.19%              | 0.5               | 0.01%          | 0.84          | 0.36%                     | 0.26                     |
| 910 | 9   | GRIN3A | rs2031202  | 103432195     | 125.29        | 0.26                   | 0.552            | A                | 1.65%                  | 0.029                 | 0.14%              | 0.6               | 0.04%          | 0.73          | 0.09%                     | 0.58                     |
| 911 | 9   | GRIN3A | rs10512284 | 103433635     | 125.29        | 0.20                   | 1.000            | T                | 0.00%                  | 0.98                  | 0.01%              | 0.9               | 0.78%          | 0.113         | 0.82%                     | 0.094                    |
| 912 | 9   | GRIN3A | rs4742820  | 103434406     | 125.29        | 0.46                   | 1.000            | G                | 1.39%                  | 0.044                 | 0.15%              | 0.6               | 0.26%          | 0.36          | 1.24%                     | 0.044                    |
| 913 | 9   | GRIN3A | rs4743478  | 103440270     | 125.30        | 0.17                   | 0.774            | T                | 0.05%                  | 0.71                  | 0.06%              | 0.7               | 0.14%          | 0.5           | 0.03%                     | 0.77                     |
| 914 | 9   | GRIN3A | rs2417282  | 103448043     | 125.31        | 0.06                   | 1.000            | G                | 1.51%                  | 0.053                 | 0.15%              | 0.5               | 0.09%          | 0.59          | 0.36%                     | 0.28                     |
| 915 | 9   | GRIN3A | rs1323413  | 103466545     | 125.33        | 0.10                   | 1.000            | G                | 1.92%                  | 0.023                 | 0.56%              | 0.3               | 0.00%          | 0.92          | 0.66%                     | 0.16                     |
| 916 | 9   | GRIN3A | rs766551   | 103467877     | 125.33        | 0.36                   | 0.878            | A                | 0.09%                  | 0.6                   | 0.04%              | 0.8               | 0.28%          | 0.35          | 0.80%                     | 0.103                    |
| 917 | 9   | GRIN3A | rs1337697  | 103518748     | 125.39        | 0.48                   | 0.564            | G                | 1.75%                  | 0.029                 | 0.91%              | 0.15              | 0.02%          | 0.8           | 0.47%                     | 0.22                     |
| 918 | 9   | GRIN3A | rs4743484  | 103519301     | 125.40        | 0.19                   | 0.816            | C                | 0.17%                  | 0.44                  | 0.26%              | 0.4               | 1.02%          | 0.063         | 0.35%                     | 0.26                     |
| 919 | 9   | DBH    | rs1076153  | 135487964     | 181.12        | 0.22                   | 0.664            | G                | 0.46%                  | 0.26                  | 0.11%              | 0.6               | 0.13%          | 0.53          | 0.09%                     | 0.58                     |
| 920 | 9   | DBH    | rs1076150  | 135488582     | 181.12        | 0.48                   | 0.882            | A                | 0.10%                  | 0.58                  | 0.00%              | 0.9               | 0.53%          | 0.19          | 0.07%                     | 0.63                     |
| 921 | 9   | DBH    | rs1611115  | 135490336     | 181.12        | 0.20                   | 0.083            | C                | 0.19%                  | 0.44                  | 0.46%              | 0.3               | 0.24%          | 0.38          | 0.34%                     | 0.28                     |
| 922 | 9   | DBH    | rs2797849  | 135491762     | 181.12        | 0.33                   | 1.000            | G                | 0.03%                  | 0.77                  | 0.06%              | 0.7               | 0.83%          | 0.12          | 0.19%                     | 0.45                     |
| 923 | 9   | DBH    | rs3025388  | 135493077     | 181.12        | 0.17                   | 0.445            | A                | 0.00%                  | 0.91                  | 0.84%              | 0.2               | 0.13%          | 0.5           | 0.00%                     | 0.91                     |
| 924 | 9   | DBH    | rs1108581  | 135495062     | 181.12        | 0.20                   | 0.268            | A                | 0.00%                  | 0.94                  | 0.10%              | 0.6               | 0.08%          | 0.6           | 0.07%                     | 0.62                     |
| 925 | 9   | DBH    | rs2519154  | 135502096     | 181.12        | 0.43                   | 0.554            | A                | 0.38%                  | 0.31                  | 0.57%              | 0.3               | 1.65%          | 0.027         | 0.03%                     | 0.77                     |

|     | Q                     | R                    | S                  | T                 | U              | V             | W              | X             | Y                 | Z                | AA                    | AB                   | AC                         | AD                        | AE                     | AF                    |
|-----|-----------------------|----------------------|--------------------|-------------------|----------------|---------------|----------------|---------------|-------------------|------------------|-----------------------|----------------------|----------------------------|---------------------------|------------------------|-----------------------|
| 1   | H2_Letter-Number Span | P_Letter-Number Span | H2_Verbal learning | P_Verbal learning | H2_Abstraction | P_Abstraction | H2_Face memory | P_Face memory | H2_Spatial memory | P_Spatial memory | H2_Spatial processing | P_Spatial processing | H2_Sensori-motor dexterity | P_Sensori-motor dexterity | H2_Emotion recognition | P_Emotion recognition |
| 893 | 0.41%                 | 0.2                  | 0.15%              | 0.45              | 0.01%          | 0.8           | 0.00%          | 0.9           | 0.10%             | 0.56             | 0.24%                 | 0.37                 | 0.00%                      | 1                         | 0.05%                  | 0.7                   |
| 894 | 0.00%                 | 0.9                  | 0.10%              | 0.55              | 0.07%          | 0.6           | 0.89%          | 0.08          | 0.97%             | 0.074            | 0.02%                 | 0.82                 | 1.12%                      | 0.05                      | 0.00%                  | 0.9                   |
| 895 | 0.05%                 | 0.7                  | 0.25%              | 0.31              | 0.00%          | 0.9           | 0.00%          | 1             | 0.03%             | 0.72             | 0.35%                 | 0.27                 | 0.10%                      | 0.5                       | 0.19%                  | 0.4                   |
| 896 | 0.44%                 | 0.2                  | 0.05%              | 0.69              | 0.02%          | 0.8           | 0.05%          | 0.7           | 0.12%             | 0.52             | 0.32%                 | 0.32                 | 0.00%                      | 0.9                       | 0.53%                  | 0.2                   |
| 897 | 0.02%                 | 0.8                  | 0.08%              | 0.6               | 0.01%          | 0.8           | 0.30%          | 0.3           | 1.22%             | 0.043            | 0.43%                 | 0.24                 | 0.04%                      | 0.7                       | 0.85%                  | 0.09                  |
| 898 | 0.00%                 | 0.9                  | 0.00%              | 0.9               | 0.00%          | 1             | 0.00%          | 1             | 0.00%             | 0.98             | 0.22%                 | 0.4                  | 0.00%                      | 1                         | 0.08%                  | 0.6                   |
| 899 | 0.06%                 | 0.7                  | 0.60%              | 0.141             | 0.00%          | 0.9           | 0.34%          | 0.3           | 1.21%             | 0.049            | 0.25%                 | 0.39                 | 0.16%                      | 0.5                       | 0.06%                  | 0.7                   |
| 900 | 0.10%                 | 0.6                  | 0.01%              | 0.85              | 0.38%          | 0.3           | 0.04%          | 0.7           | 0.24%             | 0.38             | 0.01%                 | 0.86                 | 0.20%                      | 0.4                       | 0.04%                  | 0.7                   |
| 901 | 0.00%                 | 1                    | 0.21%              | 0.4               | 0.09%          | 0.6           | 0.07%          | 0.6           | 0.04%             | 0.71             | 0.17%                 | 0.5                  | 0.72%                      | 0.12                      | 0.11%                  | 0.6                   |
| 902 | 0.00%                 | 0.9                  | 0.40%              | 0.22              | 0.39%          | 0.2           | 1.02%          | 0.05          | 0.30%             | 0.31             | 1.03%                 | 0.069                | 1.36%                      | 0.03                      | 0.23%                  | 0.4                   |
| 903 | 0.42%                 | 0.2                  | 0.39%              | 0.23              | 0.03%          | 0.7           | 0.03%          | 0.7           | 0.01%             | 0.85             | 0.01%                 | 0.85                 | 0.29%                      | 0.3                       | 0.00%                  | 1                     |
| 904 | 0.03%                 | 0.7                  | 0.03%              | 0.76              | 0.45%          | 0.2           | 0.14%          | 0.5           | 0.56%             | 0.18             | 0.08%                 | 0.62                 | 0.45%                      | 0.2                       | 0.11%                  | 0.6                   |
| 905 | 0.18%                 | 0.4                  | 0.00%              | 0.91              | 0.02%          | 0.8           | 0.02%          | 0.8           | 0.19%             | 0.42             | 0.00%                 | 0.98                 | 0.41%                      | 0.2                       | 0.00%                  | 1                     |
| 906 | 0.31%                 | 0.3                  | 0.14%              | 0.49              | 1.00%          | 0.07          | 0.07%          | 0.6           | 0.78%             | 0.118            | 0.05%                 | 0.71                 | 0.08%                      | 0.6                       | 0.06%                  | 0.7                   |
| 907 | 0.55%                 | 0.2                  | 0.02%              | 0.8               | 0.65%          | 0.13          | 0.56%          | 0.2           | 0.01%             | 0.88             | 0.01%                 | 0.88                 | 0.01%                      | 0.9                       | 0.25%                  | 0.3                   |
| 908 | 0.62%                 | 0.2                  | 0.04%              | 0.73              | 0.34%          | 0.3           | 0.00%          | 0.9           | 0.10%             | 0.59             | 0.13%                 | 0.54                 | 0.47%                      | 0.2                       | 0.09%                  | 0.6                   |
| 909 | 0.00%                 | 1                    | 0.21%              | 0.38              | 0.01%          | 0.8           | 0.01%          | 0.9           | 0.25%             | 0.35             | 0.01%                 | 0.83                 | 0.02%                      | 0.8                       | 0.25%                  | 0.3                   |
| 910 | 0.17%                 | 0.4                  | 0.09%              | 0.56              | 0.28%          | 0.3           | 0.00%          | 1             | 0.16%             | 0.47             | 0.01%                 | 0.85                 | 0.40%                      | 0.3                       | 0.16%                  | 0.5                   |
| 911 | 0.08%                 | 0.6                  | 0.26%              | 0.32              | 0.00%          | 0.9           | 0.06%          | 0.6           | 0.03%             | 0.74             | 0.10%                 | 0.58                 | 0.14%                      | 0.5                       | 0.01%                  | 0.8                   |
| 912 | 0.33%                 | 0.3                  | 0.03%              | 0.77              | 0.22%          | 0.4           | 0.00%          | 0.9           | 0.16%             | 0.47             | 0.12%                 | 0.54                 | 1.13%                      | 0.05                      | 0.02%                  | 0.8                   |
| 913 | 0.20%                 | 0.4                  | 0.15%              | 0.48              | 0.02%          | 0.8           | 0.07%          | 0.6           | 0.01%             | 0.83             | 0.20%                 | 0.44                 | 0.04%                      | 0.7                       | 0.02%                  | 0.8                   |
| 914 | 0.02%                 | 0.8                  | 0.68%              | 0.123             | 0.05%          | 0.7           | 0.53%          | 0.2           | 0.06%             | 0.67             | 0.38%                 | 0.28                 | 0.02%                      | 0.8                       | 0.01%                  | 0.9                   |
| 915 | 0.16%                 | 0.5                  | 0.00%              | 0.98              | 0.28%          | 0.3           | 1.11%          | 0.06          | 0.40%             | 0.29             | 0.14%                 | 0.55                 | 0.25%                      | 0.4                       | 1.09%                  | 0.07                  |
| 916 | 0.51%                 | 0.2                  | 0.14%              | 0.48              | 0.00%          | 0.9           | 0.08%          | 0.6           | 0.06%             | 0.65             | 0.17%                 | 0.48                 | 0.24%                      | 0.4                       | 0.18%                  | 0.4                   |
| 917 | 0.50%                 | 0.2                  | 0.00%              | 0.93              | 0.30%          | 0.3           | 0.00%          | 0.9           | 0.00%             | 0.99             | 0.69%                 | 0.15                 | 1.03%                      | 0.07                      | 0.02%                  | 0.8                   |
| 918 | 0.26%                 | 0.3                  | 0.02%              | 0.8               | 0.00%          | 1             | 0.24%          | 0.3           | 0.13%             | 0.48             | 0.17%                 | 0.46                 | 0.21%                      | 0.4                       | 0.00%                  | 1                     |
| 919 | 1.17%                 | 0.04                 | 0.89%              | 0.081             | 0.19%          | 0.4           | 0.00%          | 1             | 0.29%             | 0.35             | 0.62%                 | 0.17                 | 0.06%                      | 0.7                       | 0.44%                  | 0.2                   |
| 920 | 0.65%                 | 0.13                 | 0.05%              | 0.67              | 0.04%          | 0.7           | 0.05%          | 0.7           | 0.30%             | 0.32             | 0.09%                 | 0.59                 | 0.19%                      | 0.4                       | 0.10%                  | 0.6                   |
| 921 | 0.11%                 | 0.5                  | 0.12%              | 0.51              | 0.03%          | 0.8           | 0.25%          | 0.4           | 0.15%             | 0.49             | 0.22%                 | 0.42                 | 1.00%                      | 0.07                      | 0.42%                  | 0.2                   |
| 922 | 0.03%                 | 0.7                  | 0.03%              | 0.74              | 0.09%          | 0.6           | 0.36%          | 0.3           | 0.70%             | 0.148            | 0.62%                 | 0.19                 | 0.38%                      | 0.3                       | 0.04%                  | 0.7                   |
| 923 | 0.19%                 | 0.4                  | 0.00%              | 0.9               | 0.00%          | 0.9           | 0.27%          | 0.3           | 0.00%             | 0.98             | 0.00%                 | 0.96                 | 0.38%                      | 0.3                       | 0.29%                  | 0.3                   |
| 924 | 1.29%                 | 0.03                 | 0.00%              | 0.98              | 0.10%          | 0.6           | 0.61%          | 0.2           | 0.07%             | 0.63             | 0.11%                 | 0.56                 | 0.07%                      | 0.6                       | 0.22%                  | 0.4                   |
| 925 | 0.15%                 | 0.5                  | 0.36%              | 0.28              | 0.04%          | 0.7           | 1.27%          | 0.04          | 0.00%             | 0.91             | 0.00%                 | 0.92                 | 0.27%                      | 0.4                       | 0.00%                  | 0.9                   |



|     | A   | B     | C          | D             | E             | F                      | G                | H                | I                      | J                     | K                  | L                 | M              | N             | O                         | P                        |
|-----|-----|-------|------------|---------------|---------------|------------------------|------------------|------------------|------------------------|-----------------------|--------------------|-------------------|----------------|---------------|---------------------------|--------------------------|
| 1   | Chr | Gene  | SNP ID     | Position (bp) | Position (cM) | Minor allele frequency | Hardy-Weinberg P | Reference allele | H2_Prepulse inhibition | P_Prepulse inhibition | H2_P50 suppression | P_P50 suppression | H2_Antisaccade | P_Antisaccade | H2_Continuous performance | P_Continuous performance |
| 926 | 9   | DBH   | rs2797853  | 135502336     | 181.12        | 0.29                   | 0.464            | G                | 1.34%                  | 0.046                 | 0.01%              | 0.9               | 1.98%          | 0.0132        | 0.01%                     | 0.87                     |
| 927 | 9   | DBH   | rs77905    | 135507918     | 181.12        | 0.46                   | 0.884            | C                | 0.92%                  | 0.111                 | 0.14%              | 0.6               | 0.02%          | 0.81          | 0.35%                     | 0.29                     |
| 928 | 9   | DBH   | rs2073833  | 135510103     | 181.12        | 0.40                   | 0.646            | C                | 3.04%                  | 0.0032                | 0.54%              | 0.2               | 0.27%          | 0.36          | 0.08%                     | 0.62                     |
| 929 | 9   | GRIN1 | rs11146020 | 139152905     | 194.93        | 0.10                   | 0.677            | G                | 0.41%                  | 0.29                  | 0.00%              | 1                 | 0.05%          | 0.71          | 0.09%                     | 0.59                     |
| 930 | 9   | GRIN1 | rs2301364  | 139154356     | 194.93        | 0.14                   | 0.539            | T                | 0.04%                  | 0.73                  | 0.20%              | 0.5               | 0.16%          | 0.47          | 0.46%                     | 0.23                     |
| 931 | 9   | GRIN1 | rs12238250 | 139166503     | 194.93        | 0.05                   | 1.000            | A                | 0.02%                  | 0.79                  | 0.58%              | 0.2               | 0.29%          | 0.35          | 0.42%                     | 0.26                     |
| 932 | 10  | GAD2  | rs3781117  | 26552050      | 50.75         | 0.15                   | 0.140            | T                | 0.09%                  | 0.58                  | 0.19%              | 0.4               | 0.58%          | 0.147         | 0.25%                     | 0.34                     |
| 933 | 10  | GAD2  | rs11015008 | 26567596      | 50.80         | 0.25                   | 0.556            | G                | 0.00%                  | 0.92                  | 0.12%              | 0.6               | 0.75%          | 0.118         | 0.09%                     | 0.58                     |
| 934 | 10  | GAD2  | rs4747550  | 26625608      | 51.00         | 0.18                   | 0.447            | A                | 0.02%                  | 0.78                  | 0.07%              | 0.7               | 0.21%          | 0.39          | 0.41%                     | 0.23                     |
| 935 | 10  | GAD2  | rs876848   | 26636502      | 51.03         | 0.27                   | 0.135            | C                | 0.03%                  | 0.76                  | 0.19%              | 0.5               | 0.19%          | 0.42          | 0.13%                     | 0.5                      |
| 936 | 10  | GRID1 | rs2616673  | 87357346      | 115.75        | 0.15                   | 0.176            | C                | 0.25%                  | 0.41                  | 0.02%              | 0.8               | 0.01%          | 0.89          | 3.05%                     | 0.002                    |
| 937 | 10  | GRID1 | rs1876883  | 87365358      | 115.75        | 0.12                   | 0.477            | T                | 0.51%                  | 0.24                  | 0.51%              | 0.3               | 0.04%          | 0.74          | 0.31%                     | 0.32                     |
| 938 | 10  | GRID1 | rs2457450  | 87372875      | 115.76        | 0.40                   | 1.000            | T                | 0.07%                  | 0.62                  | 0.17%              | 0.5               | 0.46%          | 0.19          | 0.01%                     | 0.82                     |
| 939 | 10  | GRID1 | rs10788462 | 87408436      | 115.78        | 0.40                   | 0.133            | G                | 0.54%                  | 0.2                   | 0.16%              | 0.5               | 0.41%          | 0.25          | 1.02%                     | 0.064                    |
| 940 | 10  | GRID1 | rs7097285  | 87420101      | 115.79        | 0.24                   | 0.325            | C                | 0.00%                  | 0.95                  | 0.99%              | 0.12              | 0.29%          | 0.35          | 0.40%                     | 0.26                     |
| 941 | 10  | GRID1 | rs12255557 | 87426328      | 115.79        | 0.14                   | 0.381            | C                | 0.16%                  | 0.51                  | 0.31%              | 0.4               | 0.06%          | 0.66          | 0.34%                     | 0.3                      |
| 942 | 10  | GRID1 | rs2356728  | 87484397      | 115.83        | 0.47                   | 0.664            | G                | 0.24%                  | 0.39                  | 0.00%              | 1                 | 0.43%          | 0.24          | 1.26%                     | 0.037                    |
| 943 | 10  | GRID1 | rs2949374  | 87491059      | 115.84        | 0.31                   | 0.178            | C                | 0.05%                  | 0.7                   | 0.20%              | 0.5               | 0.44%          | 0.23          | 0.08%                     | 0.6                      |
| 944 | 10  | GRID1 | rs3011703  | 87509023      | 115.85        | 0.37                   | 0.435            | A                | 0.37%                  | 0.29                  | 0.04%              | 0.8               | 0.48%          | 0.2           | 1.08%                     | 0.048                    |
| 945 | 10  | GRID1 | rs2140661  | 87512489      | 115.85        | 0.48                   | 0.664            | C                | 0.29%                  | 0.34                  | 0.00%              | 1                 | 0.47%          | 0.22          | 1.13%                     | 0.049                    |
| 946 | 10  | GRID1 | rs1917155  | 87529467      | 115.86        | 0.48                   | 0.383            | T                | 0.36%                  | 0.3                   | 0.01%              | 0.9               | 0.59%          | 0.17          | 1.31%                     | 0.035                    |
| 947 | 10  | GRID1 | rs2949385  | 87533376      | 115.86        | 0.36                   | 0.432            | T                | 0.28%                  | 0.35                  | 0.01%              | 0.8               | 0.60%          | 0.15          | 0.66%                     | 0.122                    |
| 948 | 10  | GRID1 | rs1917146  | 87558623      | 115.88        | 0.18                   | 0.632            | C                | 0.39%                  | 0.24                  | 0.03%              | 0.8               | 0.53%          | 0.17          | 1.63%                     | 0.0117                   |
| 949 | 10  | GRID1 | rs7902997  | 87564546      | 115.88        | 0.27                   | 1.000            | T                | 0.01%                  | 0.85                  | 0.04%              | 0.7               | 0.00%          | 0.96          | 1.31%                     | 0.035                    |
| 950 | 10  | GRID1 | rs1112487  | 87589036      | 115.90        | 0.12                   | 0.319            | A                | 0.01%                  | 0.87                  | 0.12%              | 0.6               | 0.01%          | 0.86          | 0.50%                     | 0.2                      |
| 951 | 10  | GRID1 | rs1880386  | 87601923      | 115.91        | 0.13                   | 1.000            | G                | 0.09%                  | 0.61                  | 0.00%              | 0.9               | 0.06%          | 0.66          | 1.92%                     | 0.0112                   |
| 952 | 10  | GRID1 | rs1880385  | 87605302      | 115.91        | 0.49                   | 1.000            | T                | 0.02%                  | 0.79                  | 0.16%              | 0.5               | 0.22%          | 0.38          | 0.20%                     | 0.39                     |
| 953 | 10  | GRID1 | rs11599415 | 87607771      | 115.91        | 0.09                   | 1.000            | C                | 0.01%                  | 0.88                  | 0.20%              | 0.5               | 0.70%          | 0.14          | 0.00%                     | 0.96                     |
| 954 | 10  | GRID1 | rs7895098  | 87640358      | 115.93        | 0.17                   | 1.000            | G                | 0.02%                  | 0.82                  | 0.15%              | 0.5               | 0.03%          | 0.77          | 0.29%                     | 0.33                     |
| 955 | 10  | GRID1 | rs1917143  | 87646055      | 115.94        | 0.25                   | 0.120            | T                | 0.23%                  | 0.39                  | 1.02%              | 0.09              | 0.00%          | 0.92          | 0.01%                     | 0.88                     |
| 956 | 10  | GRID1 | rs2222546  | 87652091      | 115.94        | 0.29                   | 0.159            | G                | 0.00%                  | 0.98                  | 0.28%              | 0.4               | 0.04%          | 0.71          | 0.16%                     | 0.46                     |
| 957 | 10  | GRID1 | rs6585987  | 87655958      | 115.94        | 0.09                   | 1.000            | T                | 0.04%                  | 0.73                  | 0.00%              | 1                 | 0.02%          | 0.82          | 0.00%                     | 0.97                     |
| 958 | 10  | GRID1 | rs2882832  | 87660812      | 115.95        | 0.35                   | 0.003            | T                | 0.02%                  | 0.82                  | 0.24%              | 0.4               | 0.37%          | 0.26          | 0.08%                     | 0.59                     |

|     | Q                     | R                    | S                  | T                 | U              | V             | W              | X             | Y                 | Z                | AA                    | AB                   | AC                         | AD                        | AE                     | AF                    |
|-----|-----------------------|----------------------|--------------------|-------------------|----------------|---------------|----------------|---------------|-------------------|------------------|-----------------------|----------------------|----------------------------|---------------------------|------------------------|-----------------------|
| 1   | H2_Letter-Number Span | P_Letter-Number Span | H2_Verbal learning | P_Verbal learning | H2_Abstraction | P_Abstraction | H2_Face memory | P_Face memory | H2_Spatial memory | P_Spatial memory | H2_Spatial processing | P_Spatial processing | H2_Sensori-motor dexterity | P_Sensori-motor dexterity | H2_Emotion recognition | P_Emotion recognition |
| 926 | 0.01%                 | 0.9                  | 0.18%              | 0.44              | 0.16%          | 0.5           | 0.14%          | 0.5           | 0.37%             | 0.28             | 1.59%                 | 0.033                | 0.00%                      | 1                         | 0.06%                  | 0.7                   |
| 927 | 0.01%                 | 0.8                  | 0.56%              | 0.17              | 0.05%          | 0.7           | 0.14%          | 0.5           | 0.45%             | 0.24             | 0.08%                 | 0.64                 | 0.44%                      | 0.2                       | 0.03%                  | 0.8                   |
| 928 | 0.84%                 | 0.08                 | 1.00%              | 0.066             | 0.06%          | 0.7           | 0.60%          | 0.2           | 0.02%             | 0.82             | 0.11%                 | 0.57                 | 0.06%                      | 0.7                       | 0.54%                  | 0.2                   |
| 929 | 0.10%                 | 0.6                  | 0.20%              | 0.39              | 0.05%          | 0.7           | 0.49%          | 0.2           | 0.83%             | 0.13             | 0.16%                 | 0.52                 | 4.71%                      | 0.0002                    | 0.60%                  | 0.2                   |
| 930 | 0.10%                 | 0.6                  | 0.11%              | 0.54              | 0.00%          | 1             | 0.01%          | 0.9           | 0.12%             | 0.55             | 0.82%                 | 0.134                | 0.00%                      | 1                         | 0.09%                  | 0.6                   |
| 931 | 0.59%                 | 0.2                  | 0.11%              | 0.54              | 0.08%          | 0.6           | 0.99%          | 0.08          | 0.69%             | 0.148            | 1.55%                 | 0.038                | 1.94%                      | 0.02                      | 0.07%                  | 0.7                   |
| 932 | 0.25%                 | 0.3                  | 0.06%              | 0.64              | 0.60%          | 0.13          | 0.07%          | 0.6           | 0.07%             | 0.62             | 0.15%                 | 0.48                 | 0.49%                      | 0.2                       | 0.25%                  | 0.3                   |
| 933 | 1.33%                 | 0.03                 | 0.19%              | 0.4               | 0.00%          | 0.9           | 0.03%          | 0.8           | 0.32%             | 0.31             | 0.10%                 | 0.58                 | 0.31%                      | 0.3                       | 0.01%                  | 0.8                   |
| 934 | 0.00%                 | 1                    | 0.00%              | 0.92              | 0.00%          | 0.9           | 0.11%          | 0.5           | 0.05%             | 0.67             | 0.23%                 | 0.39                 | 1.05%                      | 0.05                      | 0.09%                  | 0.6                   |
| 935 | 0.01%                 | 0.8                  | 0.03%              | 0.75              | 0.53%          | 0.2           | 0.00%          | 0.9           | 0.01%             | 0.88             | 0.09%                 | 0.61                 | 0.09%                      | 0.6                       | 0.10%                  | 0.6                   |
| 936 | 0.02%                 | 0.8                  | 0.29%              | 0.33              | 0.39%          | 0.3           | 0.99%          | 0.07          | 0.04%             | 0.71             | 0.40%                 | 0.28                 | 0.20%                      | 0.4                       | 0.88%                  | 0.09                  |
| 937 | 0.10%                 | 0.6                  | 0.30%              | 0.32              | 0.21%          | 0.4           | 0.01%          | 0.9           | 0.24%             | 0.39             | 0.15%                 | 0.52                 | 0.95%                      | 0.08                      | 0.37%                  | 0.3                   |
| 938 | 0.22%                 | 0.3                  | 0.01%              | 0.86              | 0.13%          | 0.5           | 0.07%          | 0.6           | 0.20%             | 0.39             | 0.00%                 | 1                    | 0.21%                      | 0.4                       | 0.00%                  | 1                     |
| 939 | 0.13%                 | 0.5                  | 0.56%              | 0.16              | 1.26%          | 0.04          | 0.49%          | 0.2           | 0.44%             | 0.22             | 0.57%                 | 0.18                 | 0.01%                      | 0.9                       | 0.68%                  | 0.13                  |
| 940 | 0.47%                 | 0.2                  | 0.20%              | 0.4               | 0.09%          | 0.6           | 0.27%          | 0.3           | 0.07%             | 0.64             | 0.04%                 | 0.72                 | 0.32%                      | 0.3                       | 0.22%                  | 0.4                   |
| 941 | 1.26%                 | 0.04                 | 0.06%              | 0.64              | 0.28%          | 0.3           | 0.46%          | 0.2           | 0.15%             | 0.49             | 0.05%                 | 0.7                  | 0.02%                      | 0.8                       | 0.00%                  | 1                     |
| 942 | 0.01%                 | 0.8                  | 0.19%              | 0.4               | 0.85%          | 0.08          | 0.23%          | 0.4           | 0.03%             | 0.73             | 0.07%                 | 0.63                 | 0.00%                      | 1                         | 0.14%                  | 0.5                   |
| 943 | 0.39%                 | 0.2                  | 0.22%              | 0.36              | 0.82%          | 0.09          | 0.01%          | 0.9           | 0.01%             | 0.83             | 0.53%                 | 0.19                 | 0.70%                      | 0.12                      | 0.38%                  | 0.2                   |
| 944 | 0.32%                 | 0.3                  | 0.20%              | 0.39              | 0.54%          | 0.2           | 0.01%          | 0.9           | 0.09%             | 0.58             | 0.16%                 | 0.48                 | 0.16%                      | 0.5                       | 0.24%                  | 0.4                   |
| 945 | 0.00%                 | 1                    | 0.11%              | 0.52              | 0.89%          | 0.07          | 0.15%          | 0.5           | 0.05%             | 0.67             | 0.01%                 | 0.87                 | 0.01%                      | 0.9                       | 0.07%                  | 0.6                   |
| 946 | 0.00%                 | 0.9                  | 0.23%              | 0.36              | 0.95%          | 0.07          | 0.15%          | 0.5           | 0.09%             | 0.59             | 0.00%                 | 0.98                 | 0.02%                      | 0.8                       | 0.06%                  | 0.6                   |
| 947 | 0.48%                 | 0.2                  | 0.30%              | 0.29              | 0.80%          | 0.09          | 0.01%          | 0.9           | 0.01%             | 0.89             | 0.30%                 | 0.33                 | 0.16%                      | 0.5                       | 0.24%                  | 0.4                   |
| 948 | 0.34%                 | 0.2                  | 0.94%              | 0.05              | 0.27%          | 0.3           | 0.42%          | 0.2           | 0.11%             | 0.52             | 1.57%                 | 0.015                | 0.09%                      | 0.6                       | 0.95%                  | 0.05                  |
| 949 | 0.21%                 | 0.4                  | 0.03%              | 0.73              | 0.05%          | 0.7           | 0.04%          | 0.7           | 0.00%             | 0.9              | 0.71%                 | 0.141                | 0.01%                      | 0.8                       | 0.09%                  | 0.6                   |
| 950 | 0.44%                 | 0.2                  | 0.04%              | 0.71              | 0.00%          | 1             | 0.94%          | 0.07          | 1.44%             | 0.031            | 0.06%                 | 0.67                 | 0.02%                      | 0.8                       | 0.16%                  | 0.5                   |
| 951 | 0.13%                 | 0.5                  | 0.00%              | 0.97              | 0.00%          | 1             | 0.04%          | 0.7           | 0.01%             | 0.84             | 0.01%                 | 0.87                 | 0.15%                      | 0.5                       | 0.09%                  | 0.6                   |
| 952 | 0.02%                 | 0.8                  | 0.00%              | 0.92              | 0.15%          | 0.5           | 0.15%          | 0.4           | 0.02%             | 0.78             | 0.04%                 | 0.73                 | 0.14%                      | 0.5                       | 0.06%                  | 0.6                   |
| 953 | 0.06%                 | 0.6                  | 0.00%              | 0.94              | 0.75%          | 0.11          | 0.10%          | 0.6           | 0.00%             | 0.96             | 0.64%                 | 0.16                 | 3.73%                      | 0.0006                    | 0.16%                  | 0.5                   |
| 954 | 0.30%                 | 0.3                  | 0.01%              | 0.86              | 0.17%          | 0.4           | 0.06%          | 0.7           | 0.39%             | 0.26             | 0.11%                 | 0.57                 | 0.35%                      | 0.3                       | 0.28%                  | 0.3                   |
| 955 | 0.21%                 | 0.4                  | 0.04%              | 0.69              | 0.06%          | 0.7           | 0.08%          | 0.6           | 0.03%             | 0.77             | 0.05%                 | 0.7                  | 0.60%                      | 0.2                       | 0.04%                  | 0.7                   |
| 956 | 0.10%                 | 0.5                  | 0.01%              | 0.86              | 0.48%          | 0.2           | 0.03%          | 0.8           | 0.02%             | 0.79             | 0.00%                 | 0.98                 | 0.28%                      | 0.3                       | 0.06%                  | 0.6                   |
| 957 | 1.47%                 | 0.02                 | 0.06%              | 0.64              | 0.39%          | 0.2           | 0.02%          | 0.8           | 0.04%             | 0.72             | 0.53%                 | 0.2                  | 0.25%                      | 0.3                       | 0.32%                  | 0.3                   |
| 958 | 0.00%                 | 1                    | 0.09%              | 0.54              | 0.69%          | 0.1           | 0.00%          | 0.9           | 0.01%             | 0.85             | 0.33%                 | 0.3                  | 0.30%                      | 0.3                       | 0.17%                  | 0.4                   |

|     | A   | B     | C          | D             | E             | F                      | G                | H                | I                      | J                     | K                  | L                 | M              | N             | O                         | P                        |
|-----|-----|-------|------------|---------------|---------------|------------------------|------------------|------------------|------------------------|-----------------------|--------------------|-------------------|----------------|---------------|---------------------------|--------------------------|
| 1   | Chr | Gene  | SNP ID     | Position (bp) | Position (cM) | Minor allele frequency | Hardy-Weinberg P | Reference allele | H2_Prepulse inhibition | P_Prepulse inhibition | H2_P50 suppression | P_P50 suppression | H2_Antisaccade | P_Antisaccade | H2_Continuous performance | P_Continuous performance |
| 959 | 10  | GRID1 | rs2352099  | 87674661      | 115.96        | 0.35                   | 1.000            | T                | 1.30%                  | 0.056                 | 0.06%              | 0.7               | 0.06%          | 0.66          | 0.00%                     | 0.91                     |
| 960 | 10  | GRID1 | rs12245750 | 87678254      | 115.96        | 0.22                   | 0.051            | A                | 0.58%                  | 0.18                  | 0.26%              | 0.4               | 0.00%          | 0.91          | 0.02%                     | 0.81                     |
| 961 | 10  | GRID1 | rs7924131  | 87684856      | 115.96        | 0.45                   | 0.884            | C                | 0.09%                  | 0.6                   | 0.05%              | 0.7               | 0.00%          | 0.94          | 0.00%                     | 0.91                     |
| 962 | 10  | GRID1 | rs1418396  | 87690805      | 115.97        | 0.25                   | 0.240            | A                | 0.41%                  | 0.24                  | 0.18%              | 0.5               | 0.04%          | 0.71          | 0.47%                     | 0.19                     |
| 963 | 10  | GRID1 | rs7906886  | 87696511      | 115.97        | 0.41                   | 0.880            | G                | 1.27%                  | 0.044                 | 0.55%              | 0.2               | 0.02%          | 0.77          | 0.41%                     | 0.22                     |
| 964 | 10  | GRID1 | rs2153828  | 87705134      | 115.98        | 0.13                   | 0.752            | G                | 0.93%                  | 0.066                 | 0.03%              | 0.8               | 0.28%          | 0.3           | 0.08%                     | 0.57                     |
| 965 | 10  | GRID1 | rs4244970  | 87732575      | 115.99        | 0.45                   | 0.661            | A                | 0.09%                  | 0.6                   | 0.19%              | 0.5               | 0.09%          | 0.6           | 0.74%                     | 0.113                    |
| 966 | 10  | GRID1 | rs4393254  | 87734378      | 115.99        | 0.09                   | 1.000            | C                | 1.76%                  | 0.033                 | 0.05%              | 0.7               | 0.01%          | 0.89          | 0.34%                     | 0.31                     |
| 967 | 10  | GRID1 | rs10509525 | 87735846      | 116.00        | 0.38                   | 0.286            | C                | 0.12%                  | 0.54                  | 0.28%              | 0.4               | 0.01%          | 0.84          | 0.65%                     | 0.131                    |
| 968 | 10  | GRID1 | rs2352464  | 87737769      | 116.00        | 0.26                   | 0.714            | T                | 0.25%                  | 0.4                   | 0.00%              | 0.9               | 0.31%          | 0.34          | 0.35%                     | 0.29                     |
| 969 | 10  | GRID1 | rs2001321  | 87745432      | 116.00        | 0.26                   | 0.577            | T                | 0.04%                  | 0.73                  | 0.16%              | 0.5               | 0.21%          | 0.42          | 0.04%                     | 0.71                     |
| 970 | 10  | GRID1 | rs7089658  | 87760259      | 116.01        | 0.29                   | 0.387            | A                | 0.03%                  | 0.77                  | 0.00%              | 1                 | 0.65%          | 0.17          | 0.47%                     | 0.23                     |
| 971 | 10  | GRID1 | rs10788476 | 87766857      | 116.02        | 0.37                   | 0.165            | C                | 0.02%                  | 0.81                  | 0.02%              | 0.8               | 0.17%          | 0.46          | 1.30%                     | 0.032                    |
| 972 | 10  | GRID1 | rs12256782 | 87788988      | 116.03        | 0.21                   | 1.000            | A                | 0.10%                  | 0.59                  | 0.01%              | 0.9               | 0.09%          | 0.6           | 0.00%                     | 0.96                     |
| 973 | 10  | GRID1 | rs10788478 | 87797370      | 116.03        | 0.38                   | 1.000            | G                | 0.00%                  | 0.98                  | 0.01%              | 0.9               | 0.01%          | 0.87          | 1.09%                     | 0.05                     |
| 974 | 10  | GRID1 | rs4934146  | 87810686      | 116.04        | 0.15                   | 0.782            | A                | 1.10%                  | 0.069                 | 0.18%              | 0.5               | 0.00%          | 0.95          | 0.06%                     | 0.65                     |
| 975 | 10  | GRID1 | rs12266132 | 87813079      | 116.05        | 0.06                   | 0.016            | C                | 0.52%                  | 0.147                 | 0.00%              | 1                 | 0.15%          | 0.48          | 0.56%                     | 0.14                     |
| 976 | 10  | GRID1 | rs2001697  | 87815478      | 116.05        | 0.28                   | 0.721            | C                | 0.17%                  | 0.47                  | 0.00%              | 1                 | 0.46%          | 0.23          | 0.17%                     | 0.44                     |
| 977 | 10  | GRID1 | rs4934150  | 87855354      | 116.16        | 0.21                   | 0.510            | A                | 0.09%                  | 0.64                  | 1.19%              | 0.09              | 0.00%          | 0.91          | 0.41%                     | 0.25                     |
| 978 | 10  | GRID1 | rs4460754  | 87861881      | 116.19        | 0.13                   | 0.521            | G                | 0.24%                  | 0.44                  | 0.03%              | 0.8               | 0.08%          | 0.63          | 0.28%                     | 0.32                     |
| 979 | 10  | GRID1 | rs884700   | 87884268      | 116.31        | 0.26                   | 0.244            | T                | 1.61%                  | 0.028                 | 0.20%              | 0.5               | 0.11%          | 0.55          | 0.37%                     | 0.27                     |
| 980 | 10  | GRID1 | rs10509531 | 87887983      | 116.33        | 0.33                   | 0.241            | G                | 0.44%                  | 0.25                  | 0.75%              | 0.2               | 0.65%          | 0.16          | 0.00%                     | 0.94                     |
| 981 | 10  | GRID1 | rs12262754 | 87919062      | 116.37        | 0.13                   | 1.000            | G                | 0.12%                  | 0.54                  | 0.19%              | 0.5               | 0.92%          | 0.082         | 0.57%                     | 0.16                     |
| 982 | 10  | GRID1 | rs4934159  | 87936653      | 116.37        | 0.13                   | 1.000            | G                | 1.06%                  | 0.078                 | 0.00%              | 1                 | 0.30%          | 0.34          | 1.09%                     | 0.054                    |
| 983 | 10  | GRID1 | rs1902667  | 87939219      | 116.37        | 0.40                   | 0.363            | G                | 0.63%                  | 0.19                  | 0.58%              | 0.2               | 0.19%          | 0.45          | 0.06%                     | 0.67                     |
| 984 | 10  | GRID1 | rs2607829  | 87941666      | 116.37        | 0.25                   | 0.435            | A                | 2.14%                  | 0.0119                | 0.41%              | 0.3               | 0.01%          | 0.9           | 0.76%                     | 0.105                    |
| 985 | 10  | GRID1 | rs2607830  | 87957082      | 116.37        | 0.22                   | 1.000            | C                | 0.57%                  | 0.2                   | 0.20%              | 0.5               | 0.56%          | 0.19          | 0.82%                     | 0.101                    |
| 986 | 10  | GRID1 | rs2607840  | 87960202      | 116.37        | 0.22                   | 0.669            | G                | 0.50%                  | 0.23                  | 0.60%              | 0.2               | 0.61%          | 0.16          | 0.86%                     | 0.092                    |
| 987 | 10  | GRID1 | rs11201945 | 87965746      | 116.37        | 0.21                   | 1.000            | G                | 1.53%                  | 0.038                 | 0.04%              | 0.8               | 0.09%          | 0.61          | 1.62%                     | 0.02                     |
| 988 | 10  | GRID1 | rs2814346  | 87994907      | 116.37        | 0.16                   | 0.796            | G                | 1.16%                  | 0.074                 | 0.12%              | 0.6               | 0.10%          | 0.59          | 0.33%                     | 0.32                     |
| 989 | 10  | GRID1 | rs2814351  | 87998880      | 116.37        | 0.15                   | 0.022            | T                | 0.06%                  | 0.66                  | 0.09%              | 0.6               | 0.02%          | 0.79          | 0.01%                     | 0.86                     |
| 990 | 10  | GRID1 | rs2814352  | 88004329      | 116.37        | 0.19                   | 0.022            | T                | 0.01%                  | 0.85                  | 0.14%              | 0.5               | 0.01%          | 0.85          | 0.04%                     | 0.71                     |
| 991 | 10  | GRID1 | rs1947568  | 88008808      | 116.37        | 0.42                   | 0.766            | C                | 0.03%                  | 0.77                  | 0.41%              | 0.3               | 0.14%          | 0.5           | 0.74%                     | 0.117                    |

|     | Q                     | R                    | S                  | T                 | U              | V             | W              | X             | Y                 | Z                | AA                    | AB                   | AC                         | AD                        | AE                     | AF                    |
|-----|-----------------------|----------------------|--------------------|-------------------|----------------|---------------|----------------|---------------|-------------------|------------------|-----------------------|----------------------|----------------------------|---------------------------|------------------------|-----------------------|
| 1   | H2_Letter-Number Span | P_Letter-Number Span | H2_Verbal learning | P_Verbal learning | H2_Abstraction | P_Abstraction | H2_Face memory | P_Face memory | H2_Spatial memory | P_Spatial memory | H2_Spatial processing | P_Spatial processing | H2_Sensori-motor dexterity | P_Sensori-motor dexterity | H2_Emotion recognition | P_Emotion recognition |
| 959 | 0.13%                 | 0.5                  | 0.02%              | 0.81              | 0.25%          | 0.4           | 0.00%          | 0.9           | 0.37%             | 0.28             | 0.05%                 | 0.7                  | 0.81%                      | 0.1                       | 0.00%                  | 0.9                   |
| 960 | 0.09%                 | 0.6                  | 0.07%              | 0.62              | 0.00%          | 1             | 0.05%          | 0.7           | 0.20%             | 0.42             | 0.00%                 | 0.98                 | 0.27%                      | 0.3                       | 0.11%                  | 0.5                   |
| 961 | 0.08%                 | 0.6                  | 0.00%              | 0.92              | 0.06%          | 0.6           | 0.01%          | 0.9           | 0.50%             | 0.2              | 0.70%                 | 0.146                | 0.42%                      | 0.2                       | 0.03%                  | 0.8                   |
| 962 | 0.18%                 | 0.4                  | 0.01%              | 0.82              | 0.02%          | 0.8           | 0.00%          | 1             | 0.67%             | 0.12             | 0.00%                 | 0.97                 | 0.00%                      | 1                         | 0.48%                  | 0.2                   |
| 963 | 0.66%                 | 0.11                 | 0.29%              | 0.29              | 0.88%          | 0.07          | 0.15%          | 0.4           | 0.91%             | 0.069            | 0.03%                 | 0.76                 | 0.27%                      | 0.3                       | 0.36%                  | 0.2                   |
| 964 | 0.04%                 | 0.7                  | 0.09%              | 0.53              | 0.31%          | 0.3           | 0.17%          | 0.4           | 0.37%             | 0.23             | 0.26%                 | 0.33                 | 0.00%                      | 0.9                       | 0.09%                  | 0.5                   |
| 965 | 0.00%                 | 0.9                  | 0.01%              | 0.85              | 0.11%          | 0.5           | 0.00%          | 1             | 0.01%             | 0.88             | 0.19%                 | 0.44                 | 0.20%                      | 0.4                       | 0.00%                  | 1                     |
| 966 | 0.32%                 | 0.3                  | 0.91%              | 0.094             | 0.80%          | 0.12          | 0.80%          | 0.12          | 0.31%             | 0.35             | 0.81%                 | 0.146                | 0.00%                      | 0.9                       | 0.99%                  | 0.09                  |
| 967 | 0.03%                 | 0.8                  | 0.10%              | 0.54              | 0.27%          | 0.3           | 0.00%          | 1             | 0.01%             | 0.85             | 0.00%                 | 0.93                 | 0.41%                      | 0.2                       | 0.00%                  | 1                     |
| 968 | 0.38%                 | 0.3                  | 0.10%              | 0.56              | 0.53%          | 0.2           | 0.00%          | 0.9           | 0.15%             | 0.48             | 0.66%                 | 0.16                 | 0.24%                      | 0.4                       | 0.00%                  | 1                     |
| 969 | 0.02%                 | 0.8                  | 0.01%              | 0.89              | 0.69%          | 0.12          | 0.03%          | 0.8           | 0.16%             | 0.46             | 1.09%                 | 0.064                | 0.81%                      | 0.1                       | 0.11%                  | 0.5                   |
| 970 | 0.03%                 | 0.8                  | 0.02%              | 0.81              | 0.10%          | 0.6           | 0.06%          | 0.7           | 0.28%             | 0.36             | 0.74%                 | 0.148                | 0.22%                      | 0.4                       | 0.02%                  | 0.8                   |
| 971 | 0.00%                 | 0.9                  | 0.45%              | 0.19              | 0.33%          | 0.3           | 0.37%          | 0.2           | 0.45%             | 0.21             | 0.35%                 | 0.29                 | 1.10%                      | 0.05                      | 0.21%                  | 0.4                   |
| 972 | 0.06%                 | 0.6                  | 0.15%              | 0.46              | 0.03%          | 0.8           | 0.01%          | 0.9           | 0.05%             | 0.7              | 0.02%                 | 0.83                 | 0.23%                      | 0.4                       | 0.45%                  | 0.2                   |
| 973 | 0.01%                 | 0.8                  | 0.25%              | 0.33              | 0.43%          | 0.2           | 0.24%          | 0.4           | 0.80%             | 0.098            | 0.56%                 | 0.18                 | 1.15%                      | 0.05                      | 0.36%                  | 0.3                   |
| 974 | 0.40%                 | 0.2                  | 0.27%              | 0.33              | 0.73%          | 0.11          | 0.59%          | 0.2           | 0.27%             | 0.34             | 0.67%                 | 0.147                | 0.55%                      | 0.2                       | 0.30%                  | 0.3                   |
| 975 | 0.25%                 | 0.3                  | 0.19%              | 0.37              | 0.23%          | 0.4           | 0.80%          | 0.08          | 0.25%             | 0.36             | 0.91%                 | 0.088                | 0.28%                      | 0.3                       | 0.90%                  | 0.07                  |
| 976 | 0.16%                 | 0.4                  | 0.09%              | 0.56              | 0.34%          | 0.3           | 0.11%          | 0.5           | 0.87%             | 0.085            | 1.05%                 | 0.071                | 0.02%                      | 0.8                       | 0.32%                  | 0.3                   |
| 977 | 0.96%                 | 0.07                 | 0.00%              | 0.97              | 0.23%          | 0.4           | 0.48%          | 0.2           | 0.28%             | 0.35             | 0.30%                 | 0.34                 | 0.85%                      | 0.1                       | 0.00%                  | 0.9                   |
| 978 | 1.11%                 | 0.05                 | 0.01%              | 0.87              | 0.08%          | 0.6           | 0.53%          | 0.2           | 0.58%             | 0.16             | 0.10%                 | 0.58                 | 0.22%                      | 0.4                       | 0.08%                  | 0.6                   |
| 979 | 0.00%                 | 0.9                  | 0.27%              | 0.33              | 0.70%          | 0.12          | 0.13%          | 0.5           | 0.00%             | 0.96             | 0.06%                 | 0.66                 | 0.16%                      | 0.5                       | 0.02%                  | 0.8                   |
| 980 | 0.00%                 | 0.9                  | 0.00%              | 0.91              | 0.04%          | 0.7           | 0.07%          | 0.6           | 0.52%             | 0.21             | 0.00%                 | 0.94                 | 0.02%                      | 0.8                       | 0.11%                  | 0.5                   |
| 981 | 0.32%                 | 0.3                  | 0.55%              | 0.16              | 0.03%          | 0.7           | 0.51%          | 0.2           | 1.72%             | 0.021            | 0.74%                 | 0.149                | 0.47%                      | 0.2                       | 0.73%                  | 0.13                  |
| 982 | 0.00%                 | 1                    | 0.46%              | 0.21              | 0.06%          | 0.7           | 0.34%          | 0.3           | 1.32%             | 0.042            | 0.01%                 | 0.85                 | 0.42%                      | 0.2                       | 0.27%                  | 0.3                   |
| 983 | 0.04%                 | 0.7                  | 1.54%              | 0.021             | 0.01%          | 0.8           | 0.14%          | 0.5           | 0.14%             | 0.5              | 0.64%                 | 0.16                 | 0.19%                      | 0.4                       | 0.04%                  | 0.7                   |
| 984 | 0.53%                 | 0.2                  | 0.99%              | 0.059             | 0.35%          | 0.3           | 0.25%          | 0.4           | 0.51%             | 0.2              | 0.56%                 | 0.19                 | 0.00%                      | 0.9                       | 0.40%                  | 0.2                   |
| 985 | 0.96%                 | 0.07                 | 0.64%              | 0.138             | 0.30%          | 0.3           | 0.46%          | 0.2           | 0.18%             | 0.45             | 0.01%                 | 0.9                  | 0.07%                      | 0.6                       | 0.38%                  | 0.3                   |
| 986 | 0.07%                 | 0.6                  | 0.49%              | 0.19              | 0.50%          | 0.2           | 0.29%          | 0.3           | 0.04%             | 0.7              | 0.01%                 | 0.86                 | 0.05%                      | 0.7                       | 1.00%                  | 0.07                  |
| 987 | 0.03%                 | 0.7                  | 0.04%              | 0.7               | 0.18%          | 0.4           | 0.10%          | 0.5           | 0.00%             | 0.99             | 0.00%                 | 0.97                 | 0.05%                      | 0.7                       | 1.25%                  | 0.04                  |
| 988 | 0.08%                 | 0.6                  | 0.07%              | 0.62              | 0.07%          | 0.6           | 0.65%          | 0.14          | 0.01%             | 0.85             | 0.04%                 | 0.74                 | 0.14%                      | 0.5                       | 0.53%                  | 0.2                   |
| 989 | 0.25%                 | 0.4                  | 0.02%              | 0.81              | 0.17%          | 0.5           | 0.12%          | 0.5           | 0.24%             | 0.37             | 0.27%                 | 0.37                 | 0.51%                      | 0.2                       | 1.32%                  | 0.04                  |
| 990 | 0.05%                 | 0.7                  | 0.01%              | 0.84              | 0.04%          | 0.7           | 0.19%          | 0.4           | 0.42%             | 0.24             | 0.43%                 | 0.27                 | 0.35%                      | 0.3                       | 1.23%                  | 0.04                  |
| 991 | 0.00%                 | 0.9                  | 0.02%              | 0.81              | 0.25%          | 0.4           | 0.74%          | 0.11          | 0.06%             | 0.65             | 0.89%                 | 0.101                | 0.16%                      | 0.5                       | 0.55%                  | 0.2                   |

|      | A   | B       | C          | D             | E             | F                      | G                | H                | I                      | J                     | K                  | L                 | M              | N             | O                         | P                        |
|------|-----|---------|------------|---------------|---------------|------------------------|------------------|------------------|------------------------|-----------------------|--------------------|-------------------|----------------|---------------|---------------------------|--------------------------|
| 1    | Chr | Gene    | SNP ID     | Position (bp) | Position (cM) | Minor allele frequency | Hardy-Weinberg P | Reference allele | H2_Prepulse inhibition | P_Prepulse inhibition | H2_P50 suppression | P_P50 suppression | H2_Antisaccade | P_Antisaccade | H2_Continuous performance | P_Continuous performance |
| 992  | 10  | GRID1   | rs1870167  | 88019566      | 116.37        | 0.20                   | 0.107            | A                | 0.01%                  | 0.88                  | 0.07%              | 0.7               | 0.03%          | 0.78          | 0.02%                     | 0.78                     |
| 993  | 10  | GRID1   | rs2217224  | 88059396      | 116.37        | 0.42                   | 0.767            | T                | 0.05%                  | 0.71                  | 0.24%              | 0.4               | 0.03%          | 0.74          | 0.30%                     | 0.31                     |
| 994  | 10  | GRID1   | rs7904985  | 88106459      | 116.37        | 0.30                   | 0.610            | G                | 0.12%                  | 0.57                  | 0.43%              | 0.3               | 0.03%          | 0.77          | 0.00%                     | 0.9                      |
| 995  | 10  | GRID1   | rs4933391  | 88111974      | 116.37        | 0.30                   | 0.721            | G                | 0.09%                  | 0.58                  | 0.01%              | 0.9               | 0.17%          | 0.45          | 1.23%                     | 0.031                    |
| 996  | 10  | GRID1   | rs7089364  | 88113931      | 116.37        | 0.17                   | 0.592            | G                | 0.00%                  | 0.94                  | 0.31%              | 0.4               | 0.05%          | 0.67          | 0.03%                     | 0.73                     |
| 997  | 10  | GRID1   | rs3814614  | 88118261      | 116.37        | 0.44                   | 0.187            | C                | 0.01%                  | 0.83                  | 0.24%              | 0.4               | 0.00%          | 0.99          | 0.65%                     | 0.129                    |
| 998  | 10  | HTR7    | rs2420203  | 92497843      | 120.43        | 0.13                   | 0.747            | T                | 0.19%                  | 0.47                  | 0.06%              | 0.7               | 0.52%          | 0.22          | 0.13%                     | 0.52                     |
| 999  | 10  | HTR7    | rs7086484  | 92523709      | 120.43        | 0.30                   | 0.303            | G                | 0.05%                  | 0.7                   | 0.15%              | 0.6               | 0.07%          | 0.65          | 0.00%                     | 0.98                     |
| 1000 | 10  | HTR7    | rs12779003 | 92532245      |               | 0.00                   | 1.000            |                  |                        |                       |                    |                   |                |               |                           |                          |
| 1001 | 10  | HTR7    | rs12412496 | 92536145      | 120.43        | 0.25                   | 0.335            | G                | 0.29%                  | 0.36                  | 0.00%              | 0.9               | 0.00%          | 0.91          | 0.27%                     | 0.36                     |
| 1002 | 10  | HTR7    | rs11596518 | 92544991      | 120.43        | 0.20                   | 0.379            | A                | 0.00%                  | 0.95                  | 0.00%              | 1                 | 0.21%          | 0.42          | 0.29%                     | 0.34                     |
| 1003 | 10  | HTR7    | rs10785973 | 92588151      | 120.43        | 0.30                   | 0.292            | C                | 0.25%                  | 0.38                  | 0.00%              | 0.9               | 0.34%          | 0.29          | 0.56%                     | 0.17                     |
| 1004 | 10  | HTR7    | rs2226116  | 92590219      | 120.43        | 0.17                   | 1.000            | G                | 0.10%                  | 0.59                  | 0.10%              | 0.6               | 0.10%          | 0.57          | 0.13%                     | 0.52                     |
| 1005 | 10  | HTR7    | rs12259062 | 92600025      | 120.43        | 0.37                   | 0.438            | A                | 0.38%                  | 0.27                  | 0.07%              | 0.7               | 0.04%          | 0.73          | 0.33%                     | 0.29                     |
| 1006 | 10  | BLOC1S2 | rs12254005 | 102028675     | 130.24        | 0.50                   | 0.884            | A                | 0.06%                  | 0.69                  | 0.01%              | 0.9               | 0.09%          | 0.6           | 0.23%                     | 0.38                     |
| 1007 | 10  | BLOC1S2 | rs2305386  | 102038259     | 130.25        | 0.07                   | 1.000            | C                | 0.20%                  | 0.44                  | 0.12%              | 0.6               | 0.01%          | 0.85          | 0.11%                     | 0.55                     |
| 1008 | 10  | ADRA2A  | rs3750625  | 112829591     | 138.74        | 0.05                   | 1.000            | C                | 0.00%                  | 0.98                  | 0.30%              | 0.4               | 0.14%          | 0.5           | 0.01%                     | 0.84                     |
| 1009 | 11  | DRD4    | rs3758653  | 626399        | 2.52          | 0.19                   | 0.094            | T                | 0.09%                  | 0.61                  | 0.07%              | 0.7               | 0.05%          | 0.7           | 0.31%                     | 0.32                     |
| 1010 | 11  | TH      | rs3842748  | 2137971       | 6.73          | 0.26                   | 0.346            | C                | 0.35%                  | 0.33                  | 0.01%              | 0.9               | 0.27%          | 0.37          | 0.49%                     | 0.21                     |
| 1011 | 11  | TH      | rs2070762  | 2142911       | 6.76          | 0.45                   | 0.882            | T                | 0.01%                  | 0.9                   | 0.00%              | 0.9               | 0.02%          | 0.83          | 1.39%                     | 0.033                    |
| 1012 | 11  | BDNF    | rs6265     | 27636492      | 49.93         | 0.18                   | 1.000            | G                | 0.15%                  | 0.5                   | 0.03%              | 0.8               | 0.07%          | 0.64          | 0.00%                     | 1                        |
| 1013 | 11  | BDNF    | rs2049046  | 27680351      | 49.93         | 0.46                   | 0.039            | A                | 0.08%                  | 0.62                  | 0.58%              | 0.2               | 0.10%          | 0.57          | 0.02%                     | 0.81                     |
| 1014 | 11  | SLC1A2  | rs3818275  | 35265359      | 67.60         | 0.40                   | 1.000            | A                | 0.00%                  | 0.96                  | 0.26%              | 0.4               | 0.13%          | 0.51          | 0.22%                     | 0.38                     |
| 1015 | 11  | SLC1A2  | rs10488816 | 35267994      | 67.60         | 0.23                   | 0.688            | T                | 0.20%                  | 0.44                  | 0.77%              | 0.2               | 0.00%          | 0.96          | 0.22%                     | 0.39                     |
| 1016 | 11  | SLC1A2  | rs2281634  | 35270749      | 67.61         | 0.11                   | 1.000            | G                | 0.23%                  | 0.4                   | 0.16%              | 0.5               | 0.15%          | 0.48          | 0.64%                     | 0.137                    |
| 1017 | 11  | SLC1A2  | rs2273688  | 35295319      | 67.65         | 0.24                   | 0.420            | G                | 0.02%                  | 0.79                  | 0.07%              | 0.7               | 0.41%          | 0.24          | 2.22%                     | 0.0055                   |
| 1018 | 11  | SLC1A2  | rs4083481  | 35308455      | 67.68         | 0.22                   | 0.673            | G                | 0.51%                  | 0.24                  | 0.26%              | 0.4               | 0.41%          | 0.26          | 0.00%                     | 0.95                     |
| 1019 | 11  | SLC1A2  | rs4756213  | 35320142      | 67.70         | 0.39                   | 0.220            | C                | 0.00%                  | 0.94                  | 0.63%              | 0.2               | 0.27%          | 0.34          | 0.38%                     | 0.25                     |
| 1020 | 11  | SLC1A2  | rs2025111  | 35332773      | 67.72         | 0.48                   | 0.883            | C                | 1.14%                  | 0.076                 | 0.00%              | 1                 | 0.00%          | 0.93          | 1.51%                     | 0.028                    |
| 1021 | 11  | SLC1A2  | rs1320443  | 35337365      | 67.73         | 0.15                   | 1.000            | C                | 0.03%                  | 0.75                  | 0.41%              | 0.3               | 0.20%          | 0.41          | 1.25%                     | 0.03                     |
| 1022 | 11  | SLC1A2  | rs7931955  | 35341795      | 67.74         | 0.20                   | 0.817            | G                | 0.10%                  | 0.6                   | 0.08%              | 0.6               | 0.02%          | 0.8           | 0.08%                     | 0.6                      |
| 1023 | 11  | SLC1A2  | rs1885345  | 35349177      | 67.75         | 0.21                   | 1.000            | G                | 0.09%                  | 0.59                  | 0.29%              | 0.4               | 0.05%          | 0.68          | 2.15%                     | 0.0049                   |
| 1024 | 11  | SLC1A2  | rs911562   | 35355929      | 67.77         | 0.50                   | 1.000            | G                | 0.17%                  | 0.46                  | 0.14%              | 0.5               | 0.06%          | 0.64          | 3.28%                     | 0.00056                  |

|      | Q                     | R                    | S                  | T                 | U              | V             | W              | X             | Y                 | Z                | AA                    | AB                   | AC                         | AD                        | AE                     | AF                    |
|------|-----------------------|----------------------|--------------------|-------------------|----------------|---------------|----------------|---------------|-------------------|------------------|-----------------------|----------------------|----------------------------|---------------------------|------------------------|-----------------------|
| 1    | H2_Letter-Number Span | P_Letter-Number Span | H2_Verbal learning | P_Verbal learning | H2_Abstraction | P_Abstraction | H2_Face memory | P_Face memory | H2_Spatial memory | P_Spatial memory | H2_Spatial processing | P_Spatial processing | H2_Sensori-motor dexterity | P_Sensori-motor dexterity | H2_Emotion recognition | P_Emotion recognition |
| 992  | 0.01%                 | 0.8                  | 0.12%              | 0.52              | 0.27%          | 0.3           | 0.64%          | 0.14          | 0.57%             | 0.17             | 0.22%                 | 0.42                 | 0.51%                      | 0.2                       | 1.18%                  | 0.05                  |
| 993  | 0.00%                 | 1                    | 0.03%              | 0.73              | 0.06%          | 0.7           | 1.24%          | 0.04          | 0.07%             | 0.62             | 0.67%                 | 0.15                 | 0.55%                      | 0.2                       | 0.48%                  | 0.2                   |
| 994  | 0.08%                 | 0.6                  | 0.40%              | 0.24              | 0.00%          | 0.9           | 0.30%          | 0.3           | 0.20%             | 0.41             | 0.00%                 | 0.93                 | 0.13%                      | 0.5                       | 0.42%                  | 0.2                   |
| 995  | 0.26%                 | 0.3                  | 0.08%              | 0.56              | 0.07%          | 0.6           | 0.57%          | 0.2           | 0.09%             | 0.58             | 0.29%                 | 0.32                 | 0.00%                      | 1                         | 0.02%                  | 0.8                   |
| 996  | 0.25%                 | 0.3                  | 0.00%              | 0.91              | 0.15%          | 0.5           | 0.01%          | 0.8           | 0.09%             | 0.59             | 0.03%                 | 0.77                 | 0.05%                      | 0.7                       | 0.30%                  | 0.3                   |
| 997  | 0.23%                 | 0.3                  | 0.00%              | 0.9               | 0.13%          | 0.5           | 0.20%          | 0.4           | 0.17%             | 0.45             | 0.09%                 | 0.6                  | 0.36%                      | 0.3                       | 0.26%                  | 0.3                   |
| 998  | 0.02%                 | 0.8                  | 0.23%              | 0.36              | 0.17%          | 0.5           | 0.50%          | 0.2           | 0.23%             | 0.39             | 0.00%                 | 0.99                 | 0.00%                      | 1                         | 0.56%                  | 0.2                   |
| 999  | 0.00%                 | 1                    | 0.14%              | 0.49              | 0.45%          | 0.2           | 0.20%          | 0.4           | 0.14%             | 0.52             | 1.14%                 | 0.077                | 0.28%                      | 0.3                       | 0.00%                  | 0.9                   |
| 1000 |                       |                      |                    |                   |                |               |                |               |                   |                  |                       |                      |                            |                           |                        |                       |
| 1001 | 0.02%                 | 0.8                  | 0.38%              | 0.26              | 0.03%          | 0.8           | 0.29%          | 0.3           | 0.70%             | 0.137            | 0.87%                 | 0.115                | 0.07%                      | 0.6                       | 0.04%                  | 0.7                   |
| 1002 | 0.92%                 | 0.08                 | 0.77%              | 0.104             | 0.10%          | 0.6           | 0.07%          | 0.6           | 0.21%             | 0.43             | 0.96%                 | 0.101                | 0.97%                      | 0.08                      | 0.23%                  | 0.4                   |
| 1003 | 0.27%                 | 0.3                  | 0.00%              | 0.96              | 0.01%          | 0.9           | 0.00%          | 0.9           | 0.10%             | 0.57             | 0.60%                 | 0.17                 | 0.12%                      | 0.5                       | 0.09%                  | 0.6                   |
| 1004 | 0.05%                 | 0.7                  | 0.00%              | 0.9               | 0.11%          | 0.5           | 0.04%          | 0.7           | 0.32%             | 0.31             | 0.03%                 | 0.78                 | 0.48%                      | 0.2                       | 0.08%                  | 0.6                   |
| 1005 | 0.02%                 | 0.8                  | 0.28%              | 0.31              | 0.00%          | 0.9           | 0.31%          | 0.3           | 0.25%             | 0.36             | 0.88%                 | 0.105                | 0.55%                      | 0.2                       | 0.03%                  | 0.7                   |
| 1006 | 0.04%                 | 0.7                  | 0.20%              | 0.41              | 0.58%          | 0.2           | 0.04%          | 0.7           | 0.02%             | 0.79             | 0.01%                 | 0.86                 | 1.32%                      | 0.04                      | 0.09%                  | 0.6                   |
| 1007 | 0.00%                 | 0.9                  | 0.02%              | 0.81              | 0.17%          | 0.4           | 0.04%          | 0.7           | 0.01%             | 0.84             | 0.11%                 | 0.56                 | 0.07%                      | 0.6                       | 0.02%                  | 0.8                   |
| 1008 | 0.13%                 | 0.5                  | 0.01%              | 0.87              | 0.32%          | 0.3           | 0.38%          | 0.3           | 1.56%             | 0.021            | 0.03%                 | 0.76                 | 1.19%                      | 0.04                      | 0.30%                  | 0.3                   |
| 1009 | 0.10%                 | 0.6                  | 0.04%              | 0.71              | 0.01%          | 0.9           | 0.02%          | 0.8           | 0.00%             | 0.93             | 0.05%                 | 0.71                 | 0.72%                      | 0.12                      | 0.06%                  | 0.7                   |
| 1010 | 0.00%                 | 0.9                  | 0.01%              | 0.83              | 0.03%          | 0.8           | 0.27%          | 0.3           | 0.38%             | 0.27             | 0.02%                 | 0.83                 | 0.42%                      | 0.3                       | 0.00%                  | 0.9                   |
| 1011 | 0.80%                 | 0.09                 | 0.10%              | 0.56              | 0.10%          | 0.6           | 0.49%          | 0.2           | 1.14%             | 0.059            | 0.58%                 | 0.2                  | 0.15%                      | 0.5                       | 0.04%                  | 0.7                   |
| 1012 | 0.04%                 | 0.7                  | 0.02%              | 0.81              | 0.26%          | 0.3           | 0.03%          | 0.7           | 0.01%             | 0.87             | 0.03%                 | 0.74                 | 0.01%                      | 0.9                       | 0.41%                  | 0.2                   |
| 1013 | 0.05%                 | 0.7                  | 0.07%              | 0.61              | 0.01%          | 0.8           | 0.08%          | 0.6           | 0.00%             | 0.97             | 0.03%                 | 0.76                 | 0.33%                      | 0.3                       | 0.75%                  | 0.11                  |
| 1014 | 0.26%                 | 0.3                  | 0.44%              | 0.19              | 0.18%          | 0.4           | 0.03%          | 0.8           | 0.26%             | 0.34             | 0.02%                 | 0.78                 | 0.35%                      | 0.3                       | 0.12%                  | 0.5                   |
| 1015 | 0.57%                 | 0.15                 | 0.06%              | 0.64              | 0.08%          | 0.6           | 0.39%          | 0.2           | 0.02%             | 0.78             | 0.18%                 | 0.45                 | 0.08%                      | 0.6                       | 0.22%                  | 0.4                   |
| 1016 | 0.39%                 | 0.2                  | 0.18%              | 0.42              | 1.28%          | 0.03          | 0.29%          | 0.3           | 1.39%             | 0.028            | 0.61%                 | 0.17                 | 0.21%                      | 0.4                       | 0.16%                  | 0.4                   |
| 1017 | 0.30%                 | 0.3                  | 1.65%              | 0.0139            | 0.89%          | 0.08          | 0.55%          | 0.2           | 2.07%             | 0.0088           | 0.69%                 | 0.144                | 0.94%                      | 0.08                      | 0.43%                  | 0.2                   |
| 1018 | 0.67%                 | 0.12                 | 0.42%              | 0.22              | 0.16%          | 0.5           | 0.03%          | 0.7           | 0.07%             | 0.64             | 0.09%                 | 0.6                  | 0.19%                      | 0.4                       | 0.01%                  | 0.9                   |
| 1019 | 0.00%                 | 1                    | 0.79%              | 0.081             | 0.14%          | 0.5           | 0.04%          | 0.7           | 0.07%             | 0.63             | 0.00%                 | 0.99                 | 0.67%                      | 0.13                      | 0.02%                  | 0.8                   |
| 1020 | 1.68%                 | 0.02                 | 0.35%              | 0.28              | 2.22%          | 0.007         | 0.76%          | 0.11          | 1.21%             | 0.055            | 1.34%                 | 0.05                 | 0.27%                      | 0.4                       | 0.22%                  | 0.4                   |
| 1021 | 1.46%                 | 0.02                 | 0.20%              | 0.38              | 0.80%          | 0.08          | 0.67%          | 0.11          | 2.10%             | 0.0064           | 2.00%                 | 0.0116               | 0.02%                      | 0.8                       | 0.62%                  | 0.13                  |
| 1022 | 0.17%                 | 0.4                  | 0.48%              | 0.19              | 0.01%          | 0.9           | 0.32%          | 0.3           | 0.56%             | 0.18             | 0.01%                 | 0.83                 | 0.40%                      | 0.2                       | 0.90%                  | 0.08                  |
| 1023 | 0.01%                 | 0.8                  | 1.34%              | 0.023             | 0.13%          | 0.5           | 0.02%          | 0.8           | 0.39%             | 0.24             | 0.23%                 | 0.39                 | 0.28%                      | 0.3                       | 0.00%                  | 1                     |
| 1024 | 0.26%                 | 0.3                  | 0.25%              | 0.32              | 0.07%          | 0.6           | 0.46%          | 0.2           | 0.00%             | 0.94             | 0.02%                 | 0.78                 | 0.25%                      | 0.3                       | 0.18%                  | 0.4                   |

|      | A   | B      | C          | D             | E             | F                      | G                | H                | I                      | J                     | K                  | L                 | M              | N             | O                         | P                        |
|------|-----|--------|------------|---------------|---------------|------------------------|------------------|------------------|------------------------|-----------------------|--------------------|-------------------|----------------|---------------|---------------------------|--------------------------|
| 1    | Chr | Gene   | SNP ID     | Position (bp) | Position (cM) | Minor allele frequency | Hardy-Weinberg P | Reference allele | H2_Prepulse inhibition | P_Prepulse inhibition | H2_P50 suppression | P_P50 suppression | H2_Antisaccade | P_Antisaccade | H2_Continuous performance | P_Continuous performance |
| 1025 | 11  | SLC1A2 | rs4593985  | 35359700      | 67.77         | 0.33                   | 0.870            | C                | 0.20%                  | 0.43                  | 0.43%              | 0.3               | 0.00%          | 0.98          | 2.23%                     | 0.0053                   |
| 1026 | 11  | SLC1A2 | rs10836389 | 35372547      | 67.80         | 0.19                   | 1.000            | G                | 0.00%                  | 0.93                  | 0.15%              | 0.5               | 0.01%          | 0.84          | 1.35%                     | 0.022                    |
| 1027 | 11  | SLC1A2 | rs2421897  | 35394439      | 67.84         | 0.03                   | 1.000            | C                | 0.91%                  | 0.113                 | 1.46%              | 0.05              | 0.33%          | 0.33          | 0.09%                     | 0.62                     |
| 1028 | 11  | SLC1A2 | rs1923292  | 35394755      | 67.84         | 0.44                   | 0.057            | A                | 0.37%                  | 0.29                  | 1.05%              | 0.08              | 0.05%          | 0.69          | 2.10%                     | 0.0067                   |
| 1029 | 11  | SLC1A2 | rs1923293  | 35395679      | 67.84         | 0.04                   | 0.025            | G                | 0.34%                  | 0.33                  | 1.12%              | 0.09              | 0.01%          | 0.86          | 0.03%                     | 0.76                     |
| 1030 | 11  | CHRM1  | rs4963323  | 62431179      | 82.91         | 0.13                   | 0.535            | C                | 0.13%                  | 0.53                  | 1.30%              | 0.08              | 0.94%          | 0.085         | 0.02%                     | 0.81                     |
| 1031 | 11  | CHRM1  | rs2067477  | 62434882      | 82.91         | 0.08                   | 0.120            | C                | 0.00%                  | 0.99                  | 0.05%              | 0.7               | 0.12%          | 0.52          | 0.43%                     | 0.24                     |
| 1032 | 11  | CHRM1  | rs544978   | 62441806      | 82.92         | 0.30                   | 1.000            | A                | 0.00%                  | 0.95                  | 0.17%              | 0.5               | 0.44%          | 0.24          | 0.07%                     | 0.62                     |
| 1033 | 11  | CHRM1  | rs2075748  | 62444845      | 82.92         | 0.18                   | 1.000            | G                | 0.47%                  | 0.2                   | 0.29%              | 0.4               | 0.05%          | 0.67          | 0.12%                     | 0.5                      |
| 1034 | 11  | GRM5   | rs308884   | 87883972      | 112.15        | 0.18                   | 0.456            | G                | 0.50%                  | 0.24                  | 0.04%              | 0.7               | 0.00%          | 0.92          | 0.52%                     | 0.2                      |
| 1035 | 11  | GRM5   | rs6483229  | 87903521      | 112.16        | 0.37                   | 0.435            | G                | 0.65%                  | 0.16                  | 0.05%              | 0.7               | 0.04%          | 0.72          | 0.02%                     | 0.77                     |
| 1036 | 11  | GRM5   | rs10501667 | 87904955      | 112.16        | 0.35                   | 0.757            | A                | 0.06%                  | 0.67                  | 0.07%              | 0.7               | 0.38%          | 0.26          | 0.32%                     | 0.29                     |
| 1037 | 11  | GRM5   | rs178244   | 87908693      | 112.16        | 0.49                   | 0.083            | A                | 0.37%                  | 0.28                  | 0.03%              | 0.8               | 0.16%          | 0.46          | 0.04%                     | 0.7                      |
| 1038 | 11  | GRM5   | rs905645   | 87910401      | 112.16        | 0.13                   | 0.515            | G                | 0.07%                  | 0.64                  | 0.04%              | 0.7               | 0.02%          | 0.79          | 0.06%                     | 0.65                     |
| 1039 | 11  | GRM5   | rs308892   | 87911831      | 112.16        | 0.32                   | 0.315            | G                | 0.00%                  | 0.95                  | 0.05%              | 0.7               | 0.42%          | 0.25          | 0.61%                     | 0.16                     |
| 1040 | 11  | GRM5   | rs2131068  | 87920854      | 112.17        | 0.01                   | 1.000            | A                | 0.03%                  | 0.75                  | 0.25%              | 0.4               | 0.37%          | 0.26          | 0.12%                     | 0.55                     |
| 1041 | 11  | GRM5   | rs308793   | 87923538      | 112.17        | 0.39                   | 0.069            | G                | 0.23%                  | 0.41                  | 0.04%              | 0.7               | 0.00%          | 0.97          | 0.01%                     | 0.85                     |
| 1042 | 11  | GRM5   | rs308787   | 87925352      | 112.17        | 0.13                   | 0.539            | A                | 0.03%                  | 0.78                  | 0.00%              | 1                 | 0.03%          | 0.75          | 0.15%                     | 0.49                     |
| 1043 | 11  | GRM5   | rs719182   | 87929030      | 112.17        | 0.14                   | 0.134            | C                | 0.04%                  | 0.75                  | 0.29%              | 0.4               | 0.20%          | 0.43          | 0.10%                     | 0.57                     |
| 1044 | 11  | GRM5   | rs10501669 | 87933883      | 112.17        | 0.01                   | 1.000            | C                | 0.03%                  | 0.76                  | 0.03%              | 0.8               | 0.26%          | 0.39          | 0.44%                     | 0.26                     |
| 1045 | 11  | GRM5   | rs308873   | 87936450      | 112.17        | 0.13                   | 0.342            | C                | 1.19%                  | 0.052                 | 0.00%              | 0.9               | 0.01%          | 0.87          | 0.14%                     | 0.5                      |
| 1046 | 11  | GRM5   | rs10501670 | 87938932      | 112.17        | 0.24                   | 0.842            | A                | 0.06%                  | 0.7                   | 0.14%              | 0.5               | 0.00%          | 1             | 0.00%                     | 0.92                     |
| 1047 | 11  | GRM5   | rs308875   | 87942090      | 112.17        | 0.40                   | 0.761            | G                | 0.00%                  | 0.98                  | 0.01%              | 0.9               | 0.00%          | 0.95          | 0.00%                     | 0.95                     |
| 1048 | 11  | GRM5   | rs2133395  | 87961055      | 112.18        | 0.34                   | 0.743            | G                | 0.00%                  | 0.96                  | 0.07%              | 0.7               | 0.10%          | 0.57          | 0.05%                     | 0.69                     |
| 1049 | 11  | GRM5   | rs1504088  | 87965452      | 112.18        | 0.29                   | 0.855            | C                | 0.06%                  | 0.7                   | 0.02%              | 0.8               | 0.18%          | 0.45          | 0.21%                     | 0.41                     |
| 1050 | 11  | GRM5   | rs3816649  | 87977813      | 112.18        | 0.09                   | 0.037            | T                | 0.01%                  | 0.86                  | 0.00%              | 1                 | 0.04%          | 0.73          | 0.12%                     | 0.53                     |
| 1051 | 11  | GRM5   | rs1354411  | 88016449      | 112.20        | 0.05                   | 0.005            | A                | 0.12%                  | 0.56                  | 0.02%              | 0.8               | 0.00%          | 0.96          | 0.01%                     | 0.86                     |
| 1052 | 11  | GRM5   | rs1499043  | 88032310      | 112.20        | 0.01                   | 1.000            | A                | 0.97%                  | 0.138                 | 0.01%              | 0.8               | 1.21%          | 0.024         | 0.61%                     | 0.117                    |
| 1053 | 11  | GRM5   | rs904462   | 88070572      | 112.21        | 0.10                   | 0.011            | A                | 0.10%                  | 0.56                  | 0.13%              | 0.5               | 0.01%          | 0.88          | 0.01%                     | 0.88                     |
| 1054 | 11  | GRM5   | rs6483387  | 88079083      | 112.22        | 0.08                   | 0.080            | G                | 0.28%                  | 0.33                  | 0.06%              | 0.6               | 0.04%          | 0.7           | 0.02%                     | 0.76                     |
| 1055 | 11  | GRM5   | rs3763964  | 88079420      | 112.22        | 0.02                   | 1.000            | T                | 0.06%                  | 0.65                  | 0.02%              | 0.8               | 0.25%          | 0.33          | 0.13%                     | 0.46                     |
| 1056 | 11  | GRM5   | rs2219746  | 88082538      | 112.22        | 0.27                   | 1.000            | G                | 0.01%                  | 0.89                  | 0.02%              | 0.8               | 0.01%          | 0.84          | 0.00%                     | 0.95                     |
| 1057 | 11  | GRM5   | rs1993842  | 88091682      | 112.22        | 0.05                   | 0.026            | T                | 0.05%                  | 0.71                  | 0.01%              | 0.8               | 0.01%          | 0.86          | 0.02%                     | 0.81                     |

|      | Q                     | R                    | S                  | T                 | U              | V             | W              | X             | Y                 | Z                | AA                    | AB                   | AC                         | AD                        | AE                     | AF                    |
|------|-----------------------|----------------------|--------------------|-------------------|----------------|---------------|----------------|---------------|-------------------|------------------|-----------------------|----------------------|----------------------------|---------------------------|------------------------|-----------------------|
| 1    | H2_Letter-Number Span | P_Letter-Number Span | H2_Verbal learning | P_Verbal learning | H2_Abstraction | P_Abstraction | H2_Face memory | P_Face memory | H2_Spatial memory | P_Spatial memory | H2_Spatial processing | P_Spatial processing | H2_Sensori-motor dexterity | P_Sensori-motor dexterity | H2_Emotion recognition | P_Emotion recognition |
| 1025 | 0.30%                 | 0.3                  | 0.04%              | 0.7               | 0.07%          | 0.6           | 0.47%          | 0.2           | 0.14%             | 0.49             | 0.17%                 | 0.46                 | 0.02%                      | 0.8                       | 0.81%                  | 0.09                  |
| 1026 | 1.47%                 | 0.014                | 0.14%              | 0.45              | 0.04%          | 0.7           | 0.05%          | 0.7           | 0.00%             | 0.97             | 0.13%                 | 0.51                 | 0.56%                      | 0.15                      | 0.17%                  | 0.4                   |
| 1027 | 0.54%                 | 0.2                  | 1.00%              | 0.07              | 0.62%          | 0.13          | 0.06%          | 0.7           | 0.40%             | 0.26             | 1.68%                 | 0.032                | 1.27%                      | 0.04                      | 1.03%                  | 0.06                  |
| 1028 | 0.66%                 | 0.11                 | 0.05%              | 0.67              | 0.17%          | 0.4           | 0.02%          | 0.8           | 0.00%             | 0.99             | 0.29%                 | 0.33                 | 0.00%                      | 1                         | 0.00%                  | 0.9                   |
| 1029 | 0.38%                 | 0.3                  | 0.25%              | 0.37              | 0.48%          | 0.2           | 0.08%          | 0.6           | 0.09%             | 0.6              | 0.55%                 | 0.21                 | 1.75%                      | 0.014                     | 0.23%                  | 0.4                   |
| 1030 | 0.30%                 | 0.3                  | 0.55%              | 0.16              | 0.00%          | 0.9           | 1.11%          | 0.05          | 0.46%             | 0.21             | 0.04%                 | 0.73                 | 1.49%                      | 0.03                      | 0.48%                  | 0.2                   |
| 1031 | 0.19%                 | 0.4                  | 0.14%              | 0.48              | 1.19%          | 0.05          | 0.19%          | 0.4           | 0.44%             | 0.24             | 0.81%                 | 0.126                | 0.05%                      | 0.7                       | 0.21%                  | 0.4                   |
| 1032 | 0.82%                 | 0.09                 | 0.21%              | 0.39              | 0.04%          | 0.7           | 0.44%          | 0.2           | 0.19%             | 0.42             | 0.07%                 | 0.63                 | 0.02%                      | 0.8                       | 0.05%                  | 0.7                   |
| 1033 | 0.09%                 | 0.6                  | 0.00%              | 0.9               | 0.34%          | 0.3           | 0.02%          | 0.8           | 0.03%             | 0.74             | 0.15%                 | 0.47                 | 0.13%                      | 0.5                       | 0.05%                  | 0.7                   |
| 1034 | 1.34%                 | 0.03                 | 1.10%              | 0.054             | 0.33%          | 0.3           | 2.19%          | 0.007         | 0.08%             | 0.62             | 0.12%                 | 0.55                 | 0.17%                      | 0.5                       | 0.53%                  | 0.2                   |
| 1035 | 0.00%                 | 0.9                  | 0.29%              | 0.3               | 0.17%          | 0.4           | 0.00%          | 1             | 0.00%             | 0.92             | 0.21%                 | 0.42                 | 0.43%                      | 0.2                       | 0.30%                  | 0.3                   |
| 1036 | 0.20%                 | 0.4                  | 0.08%              | 0.59              | 0.52%          | 0.2           | 0.00%          | 0.9           | 0.01%             | 0.88             | 0.01%                 | 0.86                 | 0.20%                      | 0.4                       | 0.12%                  | 0.5                   |
| 1037 | 0.10%                 | 0.5                  | 0.23%              | 0.34              | 0.46%          | 0.2           | 1.01%          | 0.05          | 0.32%             | 0.28             | 0.00%                 | 0.93                 | 0.02%                      | 0.8                       | 0.65%                  | 0.12                  |
| 1038 | 0.01%                 | 0.9                  | 0.12%              | 0.5               | 0.01%          | 0.8           | 0.91%          | 0.07          | 0.08%             | 0.61             | 0.27%                 | 0.38                 | 0.09%                      | 0.6                       | 0.32%                  | 0.3                   |
| 1039 | 0.93%                 | 0.06                 | 0.18%              | 0.43              | 0.52%          | 0.2           | 0.02%          | 0.8           | 0.43%             | 0.24             | 0.00%                 | 0.97                 | 0.35%                      | 0.3                       | 0.00%                  | 0.9                   |
| 1040 | 0.03%                 | 0.8                  | 0.00%              | 0.98              | 0.00%          | 0.9           | 0.34%          | 0.4           | 0.59%             | 0.23             | 0.04%                 | 0.77                 | 0.47%                      | 0.3                       | 0.59%                  | 0.2                   |
| 1041 | 0.32%                 | 0.3                  | 0.01%              | 0.89              | 0.64%          | 0.14          | 0.24%          | 0.4           | 0.01%             | 0.87             | 0.16%                 | 0.5                  | 0.08%                      | 0.6                       | 0.18%                  | 0.4                   |
| 1042 | 0.00%                 | 0.9                  | 0.02%              | 0.78              | 0.19%          | 0.4           | 0.05%          | 0.7           | 1.35%             | 0.035            | 0.02%                 | 0.79                 | 0.81%                      | 0.09                      | 0.46%                  | 0.2                   |
| 1043 | 0.29%                 | 0.3                  | 0.08%              | 0.6               | 0.21%          | 0.4           | 0.04%          | 0.7           | 0.02%             | 0.83             | 0.43%                 | 0.27                 | 0.07%                      | 0.6                       | 0.00%                  | 1                     |
| 1044 | 0.45%                 | 0.2                  | 0.08%              | 0.64              | 0.28%          | 0.4           | 0.68%          | 0.2           | 0.04%             | 0.77             | 0.00%                 | 1                    | 0.06%                      | 0.7                       | 0.11%                  | 0.6                   |
| 1045 | 0.01%                 | 0.9                  | 0.04%              | 0.71              | 0.00%          | 0.9           | 0.69%          | 0.13          | 0.07%             | 0.64             | 0.41%                 | 0.28                 | 0.28%                      | 0.3                       | 0.02%                  | 0.8                   |
| 1046 | 0.20%                 | 0.4                  | 0.04%              | 0.72              | 0.24%          | 0.4           | 0.15%          | 0.5           | 0.05%             | 0.7              | 0.61%                 | 0.19                 | 1.75%                      | 0.02                      | 0.01%                  | 0.9                   |
| 1047 | 0.16%                 | 0.4                  | 0.00%              | 0.98              | 0.00%          | 1             | 0.00%          | 1             | 0.10%             | 0.58             | 0.44%                 | 0.26                 | 3.55%                      | 0.0005                    | 0.33%                  | 0.3                   |
| 1048 | 0.03%                 | 0.7                  | 0.00%              | 0.91              | 0.19%          | 0.4           | 0.27%          | 0.3           | 0.18%             | 0.46             | 0.30%                 | 0.36                 | 3.53%                      | 0.0006                    | 0.01%                  | 0.9                   |
| 1049 | 0.16%                 | 0.5                  | 0.04%              | 0.71              | 0.00%          | 1             | 0.23%          | 0.4           | 0.09%             | 0.6              | 0.73%                 | 0.16                 | 2.23%                      | 0.008                     | 0.05%                  | 0.7                   |
| 1050 | 0.61%                 | 0.15                 | 0.02%              | 0.8               | 0.24%          | 0.4           | 0.00%          | 0.9           | 0.11%             | 0.58             | 0.50%                 | 0.26                 | 0.34%                      | 0.3                       | 0.36%                  | 0.3                   |
| 1051 | 0.13%                 | 0.5                  | 0.02%              | 0.77              | 0.34%          | 0.2           | 0.24%          | 0.3           | 0.00%             | 0.94             | 0.00%                 | 0.91                 | 0.42%                      | 0.2                       | 0.09%                  | 0.6                   |
| 1052 | 0.06%                 | 0.6                  | 0.00%              | 0.92              | 0.09%          | 0.5           | 0.05%          | 0.6           | 0.16%             | 0.4              | 0.17%                 | 0.4                  | 0.02%                      | 0.7                       | 0.13%                  | 0.4                   |
| 1053 | 0.15%                 | 0.4                  | 0.03%              | 0.73              | 0.14%          | 0.4           | 0.08%          | 0.6           | 0.04%             | 0.7              | 0.05%                 | 0.68                 | 1.04%                      | 0.04                      | 0.13%                  | 0.5                   |
| 1054 | 0.09%                 | 0.5                  | 0.00%              | 1                 | 0.01%          | 0.9           | 0.05%          | 0.6           | 0.03%             | 0.75             | 0.08%                 | 0.6                  | 0.26%                      | 0.3                       | 0.21%                  | 0.3                   |
| 1055 | 0.09%                 | 0.6                  | 0.00%              | 0.93              | 0.67%          | 0.08          | 0.01%          | 0.8           | 0.01%             | 0.85             | 0.17%                 | 0.42                 | 0.04%                      | 0.7                       | 0.01%                  | 0.8                   |
| 1056 | 0.52%                 | 0.2                  | 0.01%              | 0.86              | 0.01%          | 0.9           | 0.22%          | 0.4           | 0.05%             | 0.69             | 0.37%                 | 0.31                 | 0.86%                      | 0.1                       | 0.02%                  | 0.8                   |
| 1057 | 0.30%                 | 0.3                  | 0.37%              | 0.27              | 1.26%          | 0.04          | 1.20%          | 0.04          | 0.58%             | 0.22             | 0.00%                 | 0.97                 | 1.38%                      | 0.03                      | 0.23%                  | 0.4                   |



|      | A   | B     | C          | D             | E             | F                      | G                | H                | I                      | J                     | K                  | L                 | M              | N             | O                         | P                        |
|------|-----|-------|------------|---------------|---------------|------------------------|------------------|------------------|------------------------|-----------------------|--------------------|-------------------|----------------|---------------|---------------------------|--------------------------|
| 1    | Chr | Gene  | SNP ID     | Position (bp) | Position (cM) | Minor allele frequency | Hardy-Weinberg P | Reference allele | H2_Prepulse inhibition | P_Prepulse inhibition | H2_P50 suppression | P_P50 suppression | H2_Antisaccade | P_Antisaccade | H2_Continuous performance | P_Continuous performance |
| 1058 | 11  | GRM5  | rs2169662  | 88093542      | 112.22        | 0.01                   | 1.000            | T                | 0.08%                  | 0.65                  | 0.03%              | 0.8               | 0.01%          | 0.87          | 0.37%                     | 0.31                     |
| 1059 | 11  | GRM5  | rs1532548  | 88096475      | 112.22        | 0.13                   | 0.340            | A                | 0.33%                  | 0.33                  | 0.56%              | 0.2               | 0.20%          | 0.43          | 0.29%                     | 0.32                     |
| 1060 | 11  | GRM5  | rs1499177  | 88097077      | 112.22        | 0.34                   | 0.071            | A                | 0.04%                  | 0.74                  | 0.07%              | 0.7               | 0.00%          | 0.94          | 0.05%                     | 0.7                      |
| 1061 | 11  | GRM5  | rs904493   | 88104997      | 112.22        | 0.25                   | 0.430            | C                | 0.01%                  | 0.89                  | 0.19%              | 0.5               | 0.05%          | 0.68          | 0.05%                     | 0.7                      |
| 1062 | 11  | GRM5  | rs1000061  | 88115425      | 112.23        | 0.36                   | 1.000            | A                | 0.01%                  | 0.89                  | 0.23%              | 0.5               | 0.04%          | 0.73          | 0.00%                     | 0.93                     |
| 1063 | 11  | GRM5  | rs10501680 | 88117162      | 112.23        | 0.09                   | 0.368            | A                | 0.15%                  | 0.51                  | 0.45%              | 0.3               | 0.33%          | 0.29          | 0.00%                     | 0.97                     |
| 1064 | 11  | GRM5  | rs1903851  | 88120139      | 112.23        | 0.11                   | 0.702            | T                | 0.29%                  | 0.37                  | 0.09%              | 0.6               | 0.20%          | 0.42          | 0.00%                     | 0.99                     |
| 1065 | 11  | GRM5  | rs1903841  | 88173280      | 112.25        | 0.34                   | 0.748            | C                | 0.17%                  | 0.48                  | 0.33%              | 0.4               | 0.33%          | 0.3           | 0.02%                     | 0.81                     |
| 1066 | 11  | GRM5  | rs645327   | 88228434      | 112.26        | 0.29                   | 1.000            | T                | 0.05%                  | 0.72                  | 0.03%              | 0.8               | 0.09%          | 0.6           | 0.00%                     | 0.93                     |
| 1067 | 11  | GRM5  | rs547644   | 88277389      | 112.28        | 0.02                   | 1.000            | G                | 0.06%                  | 0.67                  | 0.37%              | 0.4               | 0.17%          | 0.47          | 0.00%                     | 0.92                     |
| 1068 | 11  | GRM5  | rs167569   | 88281729      | 112.28        | 0.03                   | 1.000            | G                | 0.09%                  | 0.62                  | 0.11%              | 0.6               | 0.33%          | 0.32          | 0.00%                     | 0.91                     |
| 1069 | 11  | GRM5  | rs10830200 | 88385087      | 112.30        | 0.49                   | 1.000            | C                | 0.59%                  | 0.18                  | 0.00%              | 1                 | 0.02%          | 0.79          | 0.01%                     | 0.85                     |
| 1070 | 11  | GRM5  | rs7126679  | 88393493      | 112.30        | 0.43                   | 0.184            | C                | 0.52%                  | 0.2                   | 0.02%              | 0.8               | 0.00%          | 0.94          | 0.15%                     | 0.47                     |
| 1071 | 11  | NCAM1 | rs7944570  | 112350798     | 132.52        | 0.18                   | 0.212            | C                | 1.34%                  | 0.04                  | 0.01%              | 0.9               | 0.58%          | 0.16          | 0.07%                     | 0.63                     |
| 1072 | 11  | NCAM1 | rs12575544 | 112424195     | 132.55        | 0.23                   | 1.000            | G                | 0.01%                  | 0.85                  | 0.06%              | 0.7               | 0.45%          | 0.22          | 0.06%                     | 0.64                     |
| 1073 | 11  | NCAM1 | rs2509377  | 112431469     | 132.55        | 0.46                   | 0.771            | G                | 2.11%                  | 0.015                 | 0.11%              | 0.6               | 0.13%          | 0.52          | 0.34%                     | 0.3                      |
| 1074 | 11  | NCAM1 | rs7933413  | 112464115     | 132.57        | 0.20                   | 1.000            | A                | 0.00%                  | 0.93                  | 0.01%              | 0.9               | 0.00%          | 0.91          | 0.15%                     | 0.48                     |
| 1075 | 11  | NCAM1 | rs10502168 | 112500642     | 132.58        | 0.09                   | 0.675            | C                | 0.00%                  | 1                     | 0.56%              | 0.2               | 0.05%          | 0.68          | 0.50%                     | 0.21                     |
| 1076 | 11  | NCAM1 | rs1245119  | 112506871     | 132.59        | 0.35                   | 0.271            | C                | 2.47%                  | 0.0061                | 0.28%              | 0.4               | 0.28%          | 0.33          | 0.13%                     | 0.51                     |
| 1077 | 11  | NCAM1 | rs4937993  | 112509872     | 132.59        | 0.49                   | 1.000            | A                | 2.01%                  | 0.0147                | 0.06%              | 0.7               | 0.11%          | 0.54          | 0.03%                     | 0.74                     |
| 1078 | 11  | NCAM1 | rs1261878  | 112513530     | 132.59        | 0.23                   | 0.232            | C                | 3.39%                  | 0.00094               | 0.35%              | 0.3               | 0.12%          | 0.52          | 0.03%                     | 0.76                     |
| 1079 | 11  | NCAM1 | rs10502169 | 112523618     | 132.59        | 0.10                   | 1.000            | A                | 0.00%                  | 0.97                  | 0.00%              | 1                 | 0.11%          | 0.54          | 0.60%                     | 0.16                     |
| 1080 | 11  | NCAM1 | rs10502170 | 112545328     | 132.60        | 0.14                   | 0.541            | A                | 0.06%                  | 0.68                  | 0.16%              | 0.5               | 0.31%          | 0.31          | 0.24%                     | 0.38                     |
| 1081 | 11  | NCAM1 | rs2043602  | 112548936     | 132.60        | 0.37                   | 0.355            | A                | 1.81%                  | 0.02                  | 0.03%              | 0.8               | 0.46%          | 0.22          | 0.00%                     | 0.97                     |
| 1082 | 11  | NCAM1 | rs2196456  | 112561921     | 132.61        | 0.22                   | 0.540            | T                | 2.62%                  | 0.0036                | 0.29%              | 0.4               | 0.11%          | 0.55          | 0.12%                     | 0.52                     |
| 1083 | 11  | NCAM1 | rs1943620  | 112570503     | 132.61        | 0.38                   | 0.648            | G                | 0.24%                  | 0.4                   | 0.02%              | 0.8               | 0.29%          | 0.33          | 0.02%                     | 0.79                     |
| 1084 | 11  | NCAM1 | rs1836796  | 112578570     | 132.62        | 0.41                   | 0.882            | C                | 0.08%                  | 0.62                  | 0.11%              | 0.6               | 0.21%          | 0.41          | 0.41%                     | 0.24                     |
| 1085 | 11  | NCAM1 | rs1821693  | 112582751     | 132.62        | 0.46                   | 0.885            | T                | 0.31%                  | 0.35                  | 0.00%              | 1                 | 0.32%          | 0.32          | 0.05%                     | 0.7                      |
| 1086 | 11  | NCAM1 | rs2850303  | 112596440     | 132.62        | 0.44                   | 1.000            | T                | 0.01%                  | 0.85                  | 0.12%              | 0.6               | 0.09%          | 0.59          | 0.01%                     | 0.85                     |
| 1087 | 11  | NCAM1 | rs646558   | 112611117     | 132.62        | 0.24                   | 0.838            | G                | 0.00%                  | 0.93                  | 0.11%              | 0.6               | 0.06%          | 0.68          | 0.22%                     | 0.41                     |
| 1088 | 11  | NCAM1 | rs2303377  | 112616711     | 132.62        | 0.40                   | 0.361            | T                | 0.03%                  | 0.75                  | 0.12%              | 0.6               | 0.16%          | 0.48          | 0.18%                     | 0.44                     |
| 1089 | 11  | NCAM1 | rs620291   | 112619068     | 132.62        | 0.15                   | 0.782            | C                | 0.15%                  | 0.49                  | 0.92%              | 0.13              | 0.25%          | 0.35          | 0.11%                     | 0.53                     |
| 1090 | 11  | NCAM1 | rs605843   | 112630444     | 136.67        | 0.26                   | 0.848            | A                | 0.00%                  | 0.91                  | 0.03%              | 0.8               | 0.35%          | 0.29          | 0.09%                     | 0.57                     |

|      | Q                     | R                    | S                  | T                 | U              | V             | W              | X             | Y                 | Z                | AA                    | AB                   | AC                         | AD                        | AE                     | AF                    |
|------|-----------------------|----------------------|--------------------|-------------------|----------------|---------------|----------------|---------------|-------------------|------------------|-----------------------|----------------------|----------------------------|---------------------------|------------------------|-----------------------|
| 1    | H2_Letter-Number Span | P_Letter-Number Span | H2_Verbal learning | P_Verbal learning | H2_Abstraction | P_Abstraction | H2_Face memory | P_Face memory | H2_Spatial memory | P_Spatial memory | H2_Spatial processing | P_Spatial processing | H2_Sensori-motor dexterity | P_Sensori-motor dexterity | H2_Emotion recognition | P_Emotion recognition |
| 1058 | 0.01%                 | 0.9                  | 0.04%              | 0.73              | 0.09%          | 0.6           | 0.27%          | 0.4           | 0.66%             | 0.22             | 0.00%                 | 0.97                 | 0.09%                      | 0.6                       | 0.75%                  | 0.2                   |
| 1059 | 0.14%                 | 0.5                  | 0.32%              | 0.28              | 0.02%          | 0.8           | 0.31%          | 0.3           | 0.39%             | 0.26             | 0.30%                 | 0.35                 | 0.12%                      | 0.5                       | 0.25%                  | 0.4                   |
| 1060 | 0.33%                 | 0.3                  | 0.01%              | 0.89              | 0.16%          | 0.5           | 0.07%          | 0.6           | 0.02%             | 0.83             | 0.36%                 | 0.32                 | 0.95%                      | 0.08                      | 0.01%                  | 0.9                   |
| 1061 | 0.12%                 | 0.5                  | 0.07%              | 0.63              | 0.12%          | 0.5           | 0.43%          | 0.2           | 0.00%             | 0.92             | 0.97%                 | 0.102                | 0.27%                      | 0.4                       | 0.04%                  | 0.7                   |
| 1062 | 0.00%                 | 1                    | 0.03%              | 0.75              | 0.00%          | 0.9           | 0.48%          | 0.2           | 0.23%             | 0.4              | 0.76%                 | 0.147                | 0.01%                      | 0.9                       | 0.05%                  | 0.7                   |
| 1063 | 0.01%                 | 0.9                  | 0.04%              | 0.71              | 0.05%          | 0.7           | 0.10%          | 0.6           | 0.00%             | 0.98             | 0.01%                 | 0.87                 | 0.31%                      | 0.3                       | 0.00%                  | 0.9                   |
| 1064 | 0.01%                 | 0.9                  | 0.14%              | 0.47              | 0.13%          | 0.5           | 0.03%          | 0.8           | 0.12%             | 0.55             | 0.00%                 | 0.97                 | 0.41%                      | 0.3                       | 0.04%                  | 0.7                   |
| 1065 | 0.85%                 | 0.08                 | 0.02%              | 0.78              | 0.00%          | 1             | 0.03%          | 0.7           | 0.10%             | 0.55             | 0.00%                 | 0.94                 | 1.11%                      | 0.05                      | 0.03%                  | 0.7                   |
| 1066 | 0.00%                 | 1                    | 0.02%              | 0.8               | 0.06%          | 0.7           | 0.21%          | 0.4           | 0.15%             | 0.51             | 0.36%                 | 0.32                 | 0.17%                      | 0.5                       | 0.05%                  | 0.7                   |
| 1067 | 0.24%                 | 0.3                  | 0.37%              | 0.24              | 0.13%          | 0.5           | 0.75%          | 0.13          | 1.03%             | 0.082            | 0.05%                 | 0.7                  | 0.45%                      | 0.3                       | 0.01%                  | 0.9                   |
| 1068 | 0.40%                 | 0.2                  | 0.56%              | 0.15              | 0.18%          | 0.5           | 1.19%          | 0.06          | 0.55%             | 0.2              | 0.22%                 | 0.44                 | 0.54%                      | 0.2                       | 0.02%                  | 0.8                   |
| 1069 | 0.99%                 | 0.06                 | 0.01%              | 0.83              | 0.06%          | 0.7           | 0.88%          | 0.08          | 0.06%             | 0.65             | 0.12%                 | 0.55                 | 0.43%                      | 0.2                       | 0.06%                  | 0.7                   |
| 1070 | 0.45%                 | 0.2                  | 0.00%              | 0.95              | 0.02%          | 0.8           | 0.97%          | 0.06          | 0.08%             | 0.61             | 0.42%                 | 0.26                 | 0.15%                      | 0.5                       | 0.02%                  | 0.8                   |
| 1071 | 0.17%                 | 0.4                  | 0.00%              | 0.98              | 0.14%          | 0.5           | 0.07%          | 0.6           | 0.06%             | 0.66             | 0.57%                 | 0.18                 | 0.08%                      | 0.6                       | 0.01%                  | 0.8                   |
| 1072 | 0.30%                 | 0.3                  | 0.72%              | 0.104             | 0.59%          | 0.15          | 0.02%          | 0.8           | 0.04%             | 0.73             | 0.12%                 | 0.56                 | 0.92%                      | 0.08                      | 0.00%                  | 0.9                   |
| 1073 | 0.12%                 | 0.5                  | 0.61%              | 0.147             | 0.29%          | 0.3           | 0.02%          | 0.8           | 0.09%             | 0.6              | 0.60%                 | 0.2                  | 0.56%                      | 0.2                       | 0.04%                  | 0.7                   |
| 1074 | 0.29%                 | 0.3                  | 0.67%              | 0.116             | 0.95%          | 0.07          | 0.01%          | 0.9           | 0.03%             | 0.74             | 0.03%                 | 0.78                 | 0.31%                      | 0.3                       | 0.01%                  | 0.8                   |
| 1075 | 0.11%                 | 0.5                  | 0.56%              | 0.16              | 0.12%          | 0.5           | 0.00%          | 0.9           | 0.17%             | 0.46             | 0.00%                 | 0.91                 | 0.07%                      | 0.6                       | 0.33%                  | 0.3                   |
| 1076 | 0.29%                 | 0.3                  | 0.25%              | 0.34              | 0.09%          | 0.6           | 0.23%          | 0.4           | 0.03%             | 0.76             | 0.00%                 | 0.96                 | 0.58%                      | 0.2                       | 0.34%                  | 0.3                   |
| 1077 | 0.33%                 | 0.3                  | 0.20%              | 0.39              | 0.46%          | 0.2           | 0.01%          | 0.8           | 0.40%             | 0.26             | 0.03%                 | 0.76                 | 0.95%                      | 0.08                      | 0.43%                  | 0.2                   |
| 1078 | 0.52%                 | 0.2                  | 0.01%              | 0.85              | 0.00%          | 0.9           | 0.07%          | 0.6           | 0.00%             | 0.97             | 0.06%                 | 0.68                 | 0.07%                      | 0.6                       | 0.05%                  | 0.7                   |
| 1079 | 0.03%                 | 0.7                  | 0.34%              | 0.27              | 0.29%          | 0.3           | 0.03%          | 0.7           | 0.08%             | 0.6              | 0.18%                 | 0.46                 | 0.00%                      | 0.9                       | 0.22%                  | 0.4                   |
| 1080 | 0.29%                 | 0.3                  | 0.02%              | 0.8               | 0.13%          | 0.5           | 0.00%          | 1             | 0.17%             | 0.46             | 0.54%                 | 0.2                  | 0.00%                      | 1                         | 1.11%                  | 0.05                  |
| 1081 | 0.10%                 | 0.6                  | 0.05%              | 0.68              | 0.05%          | 0.7           | 0.11%          | 0.5           | 0.08%             | 0.61             | 0.03%                 | 0.77                 | 0.17%                      | 0.5                       | 0.59%                  | 0.2                   |
| 1082 | 0.49%                 | 0.2                  | 0.01%              | 0.88              | 0.00%          | 1             | 0.08%          | 0.6           | 0.00%             | 0.97             | 0.06%                 | 0.67                 | 0.09%                      | 0.6                       | 0.01%                  | 0.9                   |
| 1083 | 0.11%                 | 0.5                  | 0.10%              | 0.54              | 0.78%          | 0.1           | 0.11%          | 0.5           | 0.84%             | 0.096            | 0.18%                 | 0.45                 | 0.26%                      | 0.3                       | 0.39%                  | 0.3                   |
| 1084 | 0.72%                 | 0.11                 | 0.55%              | 0.15              | 0.77%          | 0.11          | 0.40%          | 0.2           | 0.23%             | 0.39             | 0.08%                 | 0.63                 | 0.59%                      | 0.2                       | 0.16%                  | 0.5                   |
| 1085 | 0.31%                 | 0.3                  | 0.28%              | 0.32              | 1.66%          | 0.02          | 0.12%          | 0.5           | 0.91%             | 0.094            | 0.29%                 | 0.37                 | 0.57%                      | 0.2                       | 0.13%                  | 0.5                   |
| 1086 | 0.44%                 | 0.2                  | 0.55%              | 0.16              | 0.19%          | 0.4           | 0.16%          | 0.5           | 0.59%             | 0.17             | 0.13%                 | 0.54                 | 0.46%                      | 0.2                       | 0.04%                  | 0.7                   |
| 1087 | 0.01%                 | 0.8                  | 0.01%              | 0.89              | 0.98%          | 0.07          | 0.08%          | 0.6           | 0.74%             | 0.143            | 0.13%                 | 0.55                 | 0.08%                      | 0.6                       | 0.08%                  | 0.6                   |
| 1088 | 0.35%                 | 0.3                  | 0.68%              | 0.121             | 0.68%          | 0.13          | 0.00%          | 0.9           | 0.36%             | 0.28             | 0.47%                 | 0.23                 | 0.06%                      | 0.6                       | 0.02%                  | 0.8                   |
| 1089 | 0.10%                 | 0.5                  | 0.33%              | 0.27              | 0.20%          | 0.4           | 0.02%          | 0.8           | 0.02%             | 0.78             | 0.30%                 | 0.32                 | 0.00%                      | 0.9                       | 0.20%                  | 0.4                   |
| 1090 | 0.01%                 | 0.8                  | 0.00%              | 0.91              | 0.01%          | 0.9           | 0.85%          | 0.08          | 0.58%             | 0.17             | 0.05%                 | 0.71                 | 0.45%                      | 0.2                       | 0.70%                  | 0.12                  |

|      | A   | B     | C          | D             | E             | F                      | G                | H                | I                      | J                     | K                  | L                 | M              | N             | O                         | P                        |
|------|-----|-------|------------|---------------|---------------|------------------------|------------------|------------------|------------------------|-----------------------|--------------------|-------------------|----------------|---------------|---------------------------|--------------------------|
| 1    | Chr | Gene  | SNP ID     | Position (bp) | Position (cM) | Minor allele frequency | Hardy-Weinberg P | Reference allele | H2_Prepulse inhibition | P_Prepulse inhibition | H2_P50 suppression | P_P50 suppression | H2_Antisaccade | P_Antisaccade | H2_Continuous performance | P_Continuous performance |
| 1091 | 11  | NCAM1 | rs7951404  | 112634337     | 136.68        | 0.07                   | 1.000            | G                | 0.63%                  | 0.2                   | 0.04%              | 0.8               | 0.00%          | 0.91          | 0.02%                     | 0.79                     |
| 1092 | 11  | NCAM1 | rs668204   | 112654852     | 136.71        | 0.10                   | 0.689            | G                | 0.52%                  | 0.23                  | 0.00%              | 1                 | 0.57%          | 0.19          | 0.00%                     | 0.91                     |
| 1093 | 11  | DRD2  | rs6279     | 112786283     | 136.86        | 0.31                   | 0.029            | G                | 0.00%                  | 0.96                  | 0.03%              | 0.8               | 0.47%          | 0.21          | 0.47%                     | 0.21                     |
| 1094 | 11  | DRD2  | rs1076563  | 112801119     | 136.88        | 0.44                   | 0.138            | G                | 0.00%                  | 0.94                  | 0.00%              | 0.9               | 0.75%          | 0.116         | 0.43%                     | 0.23                     |
| 1095 | 11  | DRD2  | rs7125415  | 112815891     | 136.90        | 0.07                   | 0.110            | C                | 0.00%                  | 0.91                  | 0.25%              | 0.4               | 0.04%          | 0.71          | 1.74%                     | 0.0114                   |
| 1096 | 11  | DRD2  | rs4648318  | 112818599     |               | 0.30                   | 0.000            |                  |                        |                       |                    |                   |                |               |                           |                          |
| 1097 | 11  | DRD2  | rs4274224  | 112824662     | 136.91        | 0.45                   | 0.664            | A                | 0.00%                  | 0.94                  | 0.57%              | 0.2               | 1.86%          | 0.018         | 0.11%                     | 0.56                     |
| 1098 | 11  | DRD2  | rs7131056  | 112834984     | 136.92        | 0.44                   | 0.237            | C                | 0.04%                  | 0.74                  | 0.66%              | 0.2               | 0.09%          | 0.62          | 0.67%                     | 0.147                    |
| 1099 | 11  | DRD2  | rs4350392  | 112840927     | 136.93        | 0.15                   | 0.161            | C                | 0.22%                  | 0.41                  | 0.04%              | 0.7               | 1.63%          | 0.018         | 0.07%                     | 0.63                     |
| 1100 | 11  | DRD2  | rs12364283 | 112852165     | 136.94        | 0.08                   | 0.128            | A                | 0.15%                  | 0.47                  | 0.69%              | 0.14              | 1.70%          | 0.0096        | 0.12%                     | 0.51                     |
| 1101 | 11  | GRIK4 | rs6589829  | 120036183     | 154.30        | 0.40                   | 0.095            | T                | 0.09%                  | 0.6                   | 0.25%              | 0.4               | 0.23%          | 0.36          | 0.11%                     | 0.52                     |
| 1102 | 11  | GRIK4 | rs7928347  | 120041103     | 154.31        | 0.24                   | 0.226            | C                | 0.23%                  | 0.43                  | 1.13%              | 0.08              | 0.00%          | 0.91          | 0.28%                     | 0.33                     |
| 1103 | 11  | GRIK4 | rs10502240 | 120053122     | 154.34        | 0.15                   | 0.781            | C                | 0.77%                  | 0.135                 | 0.01%              | 0.9               | 0.71%          | 0.136         | 0.14%                     | 0.5                      |
| 1104 | 11  | GRIK4 | rs4445646  | 120061551     | 154.36        | 0.41                   | 0.293            | T                | 1.04%                  | 0.07                  | 0.00%              | 0.9               | 0.07%          | 0.63          | 0.11%                     | 0.53                     |
| 1105 | 11  | GRIK4 | rs7126415  | 120071745     | 154.39        | 0.49                   | 0.471            | C                | 0.20%                  | 0.42                  | 0.00%              | 0.9               | 0.74%          | 0.119         | 0.69%                     | 0.121                    |
| 1106 | 11  | GRIK4 | rs3133855  | 120090061     | 154.44        | 0.35                   | 0.632            | G                | 0.15%                  | 0.49                  | 0.13%              | 0.6               | 0.08%          | 0.62          | 0.19%                     | 0.42                     |
| 1107 | 11  | GRIK4 | rs1939664  | 120090510     | 154.44        | 0.45                   | 0.245            | A                | 0.18%                  | 0.45                  | 0.13%              | 0.5               | 0.28%          | 0.34          | 0.14%                     | 0.49                     |
| 1108 | 11  | GRIK4 | rs949298   | 120113295     | 154.50        | 0.25                   | 0.254            | G                | 0.05%                  | 0.7                   | 0.01%              | 0.9               | 0.01%          | 0.89          | 1.09%                     | 0.055                    |
| 1109 | 11  | GRIK4 | rs1945010  | 120122714     | 154.52        | 0.37                   | 1.000            | C                | 0.75%                  | 0.133                 | 0.00%              | 1                 | 0.03%          | 0.75          | 0.20%                     | 0.41                     |
| 1110 | 11  | GRIK4 | rs2156762  | 120129549     | 154.54        | 0.32                   | 0.615            | T                | 0.06%                  | 0.69                  | 0.04%              | 0.8               | 0.16%          | 0.48          | 0.52%                     | 0.18                     |
| 1111 | 11  | GRIK4 | rs3133864  | 120133222     | 154.55        | 0.14                   | 0.379            | G                | 0.00%                  | 0.98                  | 1.76%              | 0.04              | 0.13%          | 0.51          | 0.28%                     | 0.33                     |
| 1112 | 11  | GRIK4 | rs10502242 | 120146214     | 154.58        | 0.02                   | 1.000            | A                | 0.19%                  | 0.44                  | 0.26%              | 0.3               | 1.13%          | 0.037         | 0.03%                     | 0.73                     |
| 1113 | 11  | GRIK4 | rs7948804  | 120148017     | 154.59        | 0.15                   | 0.140            | T                | 0.09%                  | 0.58                  | 2.21%              | 0.007             | 0.01%          | 0.87          | 0.22%                     | 0.37                     |
| 1114 | 11  | GRIK4 | rs948028   | 120149657     | 154.59        | 0.21                   | 0.066            | A                | 0.02%                  | 0.82                  | 2.44%              | 0.004             | 0.04%          | 0.71          | 0.81%                     | 0.08                     |
| 1115 | 11  | GRIK4 | rs2852217  | 120152436     | 154.60        | 0.23                   | 0.325            | T                | 0.00%                  | 0.95                  | 0.11%              | 0.6               | 0.00%          | 0.99          | 0.07%                     | 0.63                     |
| 1116 | 11  | GRIK4 | rs1815771  | 120161689     | 154.62        | 0.07                   | 0.065            | G                | 0.77%                  | 0.115                 | 0.95%              | 0.2               | 0.20%          | 0.41          | 0.00%                     | 0.9                      |
| 1117 | 11  | GRIK4 | rs879602   | 120161782     | 154.62        | 0.12                   | 1.000            | A                | 0.05%                  | 0.71                  | 1.57%              | 0.05              | 0.25%          | 0.39          | 0.01%                     | 0.9                      |
| 1118 | 11  | GRIK4 | rs3133860  | 120166388     | 154.64        | 0.15                   | 0.158            | T                | 0.00%                  | 0.98                  | 0.10%              | 0.6               | 0.18%          | 0.42          | 0.19%                     | 0.41                     |
| 1119 | 11  | GRIK4 | rs1954787  | 120168573     | 154.64        | 0.48                   | 1.000            | C                | 0.01%                  | 0.86                  | 0.07%              | 0.7               | 0.05%          | 0.7           | 0.11%                     | 0.55                     |
| 1120 | 11  | GRIK4 | rs1939670  | 120184769     | 154.68        | 0.12                   | 0.007            | A                | 0.01%                  | 0.89                  | 0.08%              | 0.6               | 0.35%          | 0.25          | 0.02%                     | 0.77                     |
| 1121 | 11  | GRIK4 | rs4935752  | 120194329     | 154.71        | 0.33                   | 0.871            | A                | 0.26%                  | 0.37                  | 0.03%              | 0.8               | 0.03%          | 0.75          | 0.28%                     | 0.32                     |
| 1122 | 11  | GRIK4 | rs6589846  | 120205357     | 154.71        | 0.41                   | 0.103            | T                | 0.39%                  | 0.28                  | 0.17%              | 0.5               | 0.52%          | 0.2           | 0.17%                     | 0.45                     |
| 1123 | 11  | GRIK4 | rs7121233  | 120222363     | 154.71        | 0.35                   | 0.751            | T                | 0.19%                  | 0.45                  | 0.93%              | 0.12              | 0.01%          | 0.88          | 0.02%                     | 0.79                     |

|      | Q                     | R                    | S                  | T                 | U              | V             | W              | X             | Y                 | Z                | AA                    | AB                   | AC                         | AD                        | AE                     | AF                    |
|------|-----------------------|----------------------|--------------------|-------------------|----------------|---------------|----------------|---------------|-------------------|------------------|-----------------------|----------------------|----------------------------|---------------------------|------------------------|-----------------------|
| 1    | H2_Letter-Number Span | P_Letter-Number Span | H2_Verbal learning | P_Verbal learning | H2_Abstraction | P_Abstraction | H2_Face memory | P_Face memory | H2_Spatial memory | P_Spatial memory | H2_Spatial processing | P_Spatial processing | H2_Sensori-motor dexterity | P_Sensori-motor dexterity | H2_Emotion recognition | P_Emotion recognition |
| 1091 | 0.01%                 | 0.9                  | 0.18%              | 0.44              | 0.19%          | 0.4           | 0.54%          | 0.2           | 0.52%             | 0.19             | 0.14%                 | 0.51                 | 0.04%                      | 0.7                       | 1.45%                  | 0.03                  |
| 1092 | 0.16%                 | 0.5                  | 0.17%              | 0.46              | 0.33%          | 0.3           | 0.09%          | 0.6           | 0.00%             | 0.91             | 0.04%                 | 0.75                 | 0.24%                      | 0.4                       | 0.14%                  | 0.5                   |
| 1093 | 0.05%                 | 0.7                  | 0.02%              | 0.78              | 0.01%          | 0.9           | 0.18%          | 0.4           | 0.03%             | 0.74             | 0.00%                 | 0.93                 | 1.22%                      | 0.04                      | 0.08%                  | 0.6                   |
| 1094 | 0.05%                 | 0.7                  | 0.29%              | 0.3               | 0.13%          | 0.5           | 0.03%          | 0.7           | 0.07%             | 0.63             | 0.07%                 | 0.65                 | 0.55%                      | 0.2                       | 0.04%                  | 0.7                   |
| 1095 | 0.04%                 | 0.7                  | 0.00%              | 0.92              | 0.08%          | 0.6           | 1.08%          | 0.04          | 0.37%             | 0.25             | 1.47%                 | 0.032                | 0.09%                      | 0.6                       | 0.41%                  | 0.2                   |
| 1096 |                       |                      |                    |                   |                |               |                |               |                   |                  |                       |                      |                            |                           |                        |                       |
| 1097 | 0.04%                 | 0.7                  | 0.34%              | 0.28              | 0.92%          | 0.08          | 0.40%          | 0.2           | 0.14%             | 0.51             | 0.04%                 | 0.72                 | 0.04%                      | 0.7                       | 0.10%                  | 0.6                   |
| 1098 | 0.67%                 | 0.13                 | 0.39%              | 0.25              | 0.13%          | 0.5           | 0.83%          | 0.1           | 0.16%             | 0.49             | 1.36%                 | 0.052                | 0.02%                      | 0.8                       | 0.06%                  | 0.7                   |
| 1099 | 0.20%                 | 0.4                  | 0.06%              | 0.63              | 0.66%          | 0.13          | 0.88%          | 0.08          | 0.04%             | 0.74             | 1.00%                 | 0.09                 | 0.00%                      | 0.9                       | 0.10%                  | 0.6                   |
| 1100 | 0.27%                 | 0.3                  | 0.05%              | 0.63              | 0.00%          | 0.9           | 0.16%          | 0.4           | 0.03%             | 0.75             | 0.28%                 | 0.35                 | 0.00%                      | 0.9                       | 0.09%                  | 0.6                   |
| 1101 | 0.27%                 | 0.3                  | 0.02%              | 0.79              | 0.01%          | 0.9           | 0.14%          | 0.5           | 0.00%             | 0.97             | 0.00%                 | 0.91                 | 0.06%                      | 0.6                       | 0.01%                  | 0.9                   |
| 1102 | 1.80%                 | 0.011                | 0.18%              | 0.43              | 0.36%          | 0.3           | 0.05%          | 0.7           | 0.00%             | 0.91             | 0.13%                 | 0.53                 | 0.32%                      | 0.3                       | 0.10%                  | 0.6                   |
| 1103 | 0.50%                 | 0.2                  | 0.89%              | 0.079             | 0.64%          | 0.14          | 1.02%          | 0.06          | 0.75%             | 0.123            | 0.68%                 | 0.15                 | 0.65%                      | 0.14                      | 1.11%                  | 0.06                  |
| 1104 | 0.05%                 | 0.7                  | 0.00%              | 0.94              | 0.02%          | 0.8           | 0.71%          | 0.1           | 0.03%             | 0.76             | 0.20%                 | 0.43                 | 0.01%                      | 0.9                       | 0.00%                  | 0.9                   |
| 1105 | 0.01%                 | 0.9                  | 0.01%              | 0.87              | 0.07%          | 0.6           | 1.31%          | 0.03          | 0.16%             | 0.45             | 0.11%                 | 0.56                 | 0.68%                      | 0.12                      | 0.39%                  | 0.2                   |
| 1106 | 0.00%                 | 1                    | 0.04%              | 0.7               | 0.00%          | 0.9           | 0.79%          | 0.1           | 0.11%             | 0.56             | 0.10%                 | 0.57                 | 0.13%                      | 0.5                       | 0.63%                  | 0.2                   |
| 1107 | 0.00%                 | 0.9                  | 0.11%              | 0.53              | 0.04%          | 0.7           | 0.73%          | 0.1           | 0.04%             | 0.71             | 0.10%                 | 0.56                 | 0.31%                      | 0.3                       | 0.34%                  | 0.3                   |
| 1108 | 0.04%                 | 0.7                  | 0.01%              | 0.88              | 1.10%          | 0.05          | 0.39%          | 0.2           | 0.44%             | 0.23             | 0.52%                 | 0.21                 | 0.10%                      | 0.6                       | 0.30%                  | 0.3                   |
| 1109 | 0.18%                 | 0.4                  | 0.10%              | 0.55              | 1.54%          | 0.02          | 0.51%          | 0.2           | 0.41%             | 0.25             | 0.84%                 | 0.113                | 0.63%                      | 0.15                      | 0.84%                  | 0.09                  |
| 1110 | 0.79%                 | 0.09                 | 0.34%              | 0.28              | 0.17%          | 0.4           | 0.01%          | 0.9           | 0.01%             | 0.84             | 0.00%                 | 0.92                 | 0.02%                      | 0.8                       | 0.29%                  | 0.3                   |
| 1111 | 0.06%                 | 0.6                  | 0.30%              | 0.3               | 0.00%          | 0.9           | 0.05%          | 0.7           | 0.02%             | 0.77             | 0.24%                 | 0.37                 | 0.01%                      | 0.8                       | 0.57%                  | 0.2                   |
| 1112 | 0.09%                 | 0.6                  | 0.47%              | 0.18              | 0.00%          | 1             | 0.00%          | 0.9           | 0.02%             | 0.78             | 0.62%                 | 0.17                 | 0.06%                      | 0.6                       | 0.28%                  | 0.3                   |
| 1113 | 0.36%                 | 0.2                  | 0.13%              | 0.48              | 0.44%          | 0.2           | 0.00%          | 0.9           | 0.01%             | 0.88             | 1.15%                 | 0.053                | 0.14%                      | 0.5                       | 0.07%                  | 0.6                   |
| 1114 | 0.31%                 | 0.3                  | 0.33%              | 0.26              | 0.17%          | 0.4           | 0.02%          | 0.8           | 0.10%             | 0.56             | 0.85%                 | 0.098                | 0.17%                      | 0.4                       | 0.01%                  | 0.9                   |
| 1115 | 0.45%                 | 0.2                  | 0.13%              | 0.49              | 1.46%          | 0.02          | 0.56%          | 0.2           | 0.21%             | 0.39             | 1.08%                 | 0.067                | 0.22%                      | 0.4                       | 0.48%                  | 0.2                   |
| 1116 | 0.01%                 | 0.8                  | 0.01%              | 0.82              | 1.33%          | 0.04          | 0.10%          | 0.6           | 0.66%             | 0.133            | 0.51%                 | 0.21                 | 0.07%                      | 0.6                       | 0.00%                  | 1                     |
| 1117 | 0.02%                 | 0.8                  | 0.12%              | 0.54              | 0.64%          | 0.13          | 0.04%          | 0.7           | 0.05%             | 0.71             | 0.03%                 | 0.76                 | 0.19%                      | 0.4                       | 0.02%                  | 0.8                   |
| 1118 | 0.07%                 | 0.6                  | 0.08%              | 0.58              | 0.05%          | 0.7           | 0.04%          | 0.7           | 0.26%             | 0.35             | 0.53%                 | 0.19                 | 0.15%                      | 0.5                       | 0.76%                  | 0.1                   |
| 1119 | 0.09%                 | 0.6                  | 0.09%              | 0.58              | 1.48%          | 0.03          | 0.24%          | 0.4           | 0.39%             | 0.27             | 0.12%                 | 0.54                 | 0.36%                      | 0.3                       | 0.63%                  | 0.2                   |
| 1120 | 0.02%                 | 0.8                  | 0.04%              | 0.69              | 0.06%          | 0.6           | 0.03%          | 0.7           | 0.18%             | 0.41             | 0.06%                 | 0.67                 | 0.24%                      | 0.3                       | 0.01%                  | 0.9                   |
| 1121 | 0.23%                 | 0.3                  | 0.00%              | 0.95              | 0.14%          | 0.5           | 0.22%          | 0.4           | 0.62%             | 0.148            | 0.52%                 | 0.2                  | 0.31%                      | 0.3                       | 0.08%                  | 0.6                   |
| 1122 | 0.05%                 | 0.7                  | 0.22%              | 0.37              | 0.51%          | 0.2           | 0.27%          | 0.3           | 0.10%             | 0.57             | 1.04%                 | 0.073                | 0.60%                      | 0.2                       | 0.00%                  | 1                     |
| 1123 | 0.11%                 | 0.5                  | 0.03%              | 0.74              | 0.04%          | 0.7           | 0.84%          | 0.08          | 0.77%             | 0.11             | 0.67%                 | 0.143                | 0.25%                      | 0.4                       | 0.99%                  | 0.07                  |

|      | A   | B      | C          | D             | E             | F                      | G                | H                | I                      | J                     | K                  | L                 | M              | N             | O                         | P                        |
|------|-----|--------|------------|---------------|---------------|------------------------|------------------|------------------|------------------------|-----------------------|--------------------|-------------------|----------------|---------------|---------------------------|--------------------------|
| 1    | Chr | Gene   | SNP ID     | Position (bp) | Position (cM) | Minor allele frequency | Hardy-Weinberg P | Reference allele | H2_Prepulse inhibition | P_Prepulse inhibition | H2_P50 suppression | P_P50 suppression | H2_Antisaccade | P_Antisaccade | H2_Continuous performance | P_Continuous performance |
| 1124 | 11  | GRIK4  | rs11218030 | 120225204     | 154.71        | 0.19                   | 0.489            | A                | 0.01%                  | 0.88                  | 0.04%              | 0.8               | 0.72%          | 0.143         | 0.01%                     | 0.84                     |
| 1125 | 11  | GRIK4  | rs4331110  | 120235879     | 154.71        | 0.43                   | 0.371            | G                | 0.00%                  | 1                     | 0.28%              | 0.4               | 0.00%          | 0.91          | 0.07%                     | 0.63                     |
| 1126 | 11  | GRIK4  | rs4344499  | 120239629     | 154.71        | 0.27                   | 0.711            | T                | 0.01%                  | 0.84                  | 0.23%              | 0.5               | 0.05%          | 0.7           | 0.21%                     | 0.42                     |
| 1127 | 11  | GRIK4  | rs3802912  | 120243607     | 154.71        | 0.35                   | 0.153            | C                | 0.18%                  | 0.47                  | 0.07%              | 0.7               | 0.00%          | 0.95          | 0.63%                     | 0.15                     |
| 1128 | 11  | GRIK4  | rs12577602 | 120260428     | 154.71        | 0.18                   | 0.616            | G                | 0.06%                  | 0.69                  | 0.00%              | 1                 | 0.00%          | 0.99          | 0.03%                     | 0.77                     |
| 1129 | 11  | GRIK4  | rs7111184  | 120276273     | 154.71        | 0.36                   | 0.755            | T                | 0.91%                  | 0.124                 | 0.03%              | 0.8               | 0.34%          | 0.32          | 0.02%                     | 0.81                     |
| 1130 | 11  | GRIK4  | rs2156635  | 120276878     | 154.71        | 0.47                   | 0.558            | G                | 0.07%                  | 0.64                  | 0.16%              | 0.5               | 0.02%          | 0.8           | 0.08%                     | 0.59                     |
| 1131 | 11  | GRIK4  | rs2156634  | 120281211     | 154.72        | 0.14                   | 0.772            | T                | 0.00%                  | 0.92                  | 0.11%              | 0.6               | 0.03%          | 0.76          | 0.08%                     | 0.61                     |
| 1132 | 11  | GRIK4  | rs2156633  | 120292102     | 154.72        | 0.31                   | 0.865            | A                | 0.13%                  | 0.57                  | 0.01%              | 0.9               | 0.48%          | 0.25          | 0.19%                     | 0.46                     |
| 1133 | 11  | GRIK4  | rs949295   | 120295062     | 154.72        | 0.48                   | 0.192            | G                | 0.03%                  | 0.77                  | 0.10%              | 0.6               | 0.16%          | 0.5           | 0.03%                     | 0.75                     |
| 1134 | 11  | GRIK4  | rs10502243 | 120300651     | 154.72        | 0.16                   | 0.103            | G                | 0.00%                  | 0.96                  | 0.48%              | 0.3               | 0.31%          | 0.3           | 0.00%                     | 0.92                     |
| 1135 | 11  | GRIK4  | rs949054   | 120301098     | 154.72        | 0.20                   | 0.656            | A                | 0.91%                  | 0.109                 | 0.14%              | 0.6               | 0.25%          | 0.37          | 0.00%                     | 0.96                     |
| 1136 | 11  | GRIK4  | rs10892647 | 120309501     | 154.72        | 0.31                   | 0.069            | A                | 0.84%                  | 0.12                  | 0.01%              | 0.9               | 1.01%          | 0.071         | 1.13%                     | 0.053                    |
| 1137 | 11  | GRIK4  | rs602104   | 120314593     | 154.72        | 0.21                   | 0.194            | T                | 0.02%                  | 0.81                  | 0.12%              | 0.6               | 0.42%          | 0.25          | 0.02%                     | 0.82                     |
| 1138 | 11  | GRIK4  | rs2298724  | 120328931     | 154.72        | 0.31                   | 0.602            | T                | 0.29%                  | 0.35                  | 0.42%              | 0.3               | 0.16%          | 0.47          | 0.35%                     | 0.28                     |
| 1139 | 11  | GRIK4  | rs734167   | 120334569     | 154.72        | 0.19                   | 0.240            | C                | 1.67%                  | 0.032                 | 0.00%              | 1                 | 1.80%          | 0.025         | 0.07%                     | 0.63                     |
| 1140 | 11  | GRIK4  | rs4936570  | 120339783     | 154.72        | 0.24                   | 0.336            | C                | 0.43%                  | 0.28                  | 0.26%              | 0.4               | 5.36%          | 8.30E-05      | 0.56%                     | 0.18                     |
| 1141 | 11  | FEZ1   | rs6590145  | 124823126     | 162.72        | 0.15                   | 0.422            | G                | 0.15%                  | 0.49                  | 0.01%              | 0.9               | 0.00%          | 0.96          | 0.55%                     | 0.17                     |
| 1142 | 11  | FEZ1   | rs11220083 | 124833570     |               | 0.00                   | 1.000            |                  |                        |                       |                    |                   |                |               |                           |                          |
| 1143 | 11  | FEZ1   | rs12223186 | 124836849     | 162.72        | 0.39                   | 0.450            | A                | 0.07%                  | 0.66                  | 0.00%              | 1                 | 0.25%          | 0.37          | 0.37%                     | 0.27                     |
| 1144 | 11  | FEZ1   | rs2849222  | 124858699     | 162.72        | 0.25                   | 1.000            | A                | 0.10%                  | 0.58                  | 0.62%              | 0.09              | 0.06%          | 0.64          | 0.09%                     | 0.58                     |
| 1145 | 12  | GRIN2B | rs1805502  | 13605448      | 31.43         | 0.16                   | 0.094            | A                | 0.03%                  | 0.77                  | 0.00%              | 1                 | 0.32%          | 0.32          | 0.07%                     | 0.64                     |
| 1146 | 12  | GRIN2B | rs890      | 13606575      | 31.43         | 0.50                   | 0.562            | T                | 0.65%                  | 0.17                  | 0.64%              | 0.2               | 0.33%          | 0.31          | 0.78%                     | 0.109                    |
| 1147 | 12  | GRIN2B | rs1805247  | 13607242      | 31.43         | 0.08                   | 0.133            | A                | 0.26%                  | 0.4                   | 0.43%              | 0.3               | 0.18%          | 0.47          | 0.27%                     | 0.36                     |
| 1148 | 12  | GRIN2B | rs4764011  | 13611689      | 31.43         | 0.46                   | 0.771            | A                | 0.19%                  | 0.44                  | 0.08%              | 0.6               | 0.03%          | 0.77          | 0.64%                     | 0.144                    |
| 1149 | 12  | GRIN2B | rs2268092  | 13612439      | 31.43         | 0.07                   | 0.065            | A                | 0.16%                  | 0.49                  | 0.00%              | 0.9               | 0.28%          | 0.33          | 0.18%                     | 0.43                     |
| 1150 | 12  | GRIN2B | rs1806209  | 13612543      | 31.43         | 0.09                   | 0.024            | C                | 0.01%                  | 0.84                  | 0.11%              | 0.6               | 0.56%          | 0.17          | 0.03%                     | 0.76                     |
| 1151 | 12  | GRIN2B | rs1806194  | 13614394      | 31.43         | 0.41                   | 0.293            | T                | 0.14%                  | 0.52                  | 0.12%              | 0.6               | 0.23%          | 0.4           | 0.23%                     | 0.39                     |
| 1152 | 12  | GRIN2B | rs2193147  | 13624088      | 31.43         | 0.37                   | 0.063            | C                | 0.07%                  | 0.66                  | 0.06%              | 0.7               | 0.10%          | 0.58          | 0.04%                     | 0.7                      |
| 1153 | 12  | GRIN2B | rs1805470  | 13627299      | 31.43         | 0.16                   | 0.094            | T                | 0.28%                  | 0.38                  | 0.10%              | 0.6               | 0.07%          | 0.65          | 0.08%                     | 0.6                      |
| 1154 | 12  | GRIN2B | rs7970177  | 13630255      | 31.43         | 0.06                   | 1.000            | C                | 0.47%                  | 0.27                  | 0.19%              | 0.5               | 0.03%          | 0.78          | 0.03%                     | 0.77                     |
| 1155 | 12  | GRIN2B | rs1805490  | 13632338      | 31.43         | 0.25                   | 0.325            | G                | 0.68%                  | 0.148                 | 0.02%              | 0.8               | 0.62%          | 0.149         | 0.20%                     | 0.41                     |
| 1156 | 12  | GRIN2B | rs2268097  | 13644099      | 31.43         | 0.40                   | 0.765            | A                | 0.31%                  | 0.35                  | 0.21%              | 0.5               | 0.01%          | 0.83          | 0.00%                     | 0.98                     |

|      | Q                     | R                    | S                  | T                 | U              | V             | W              | X             | Y                 | Z                | AA                    | AB                   | AC                         | AD                        | AE                     | AF                    |
|------|-----------------------|----------------------|--------------------|-------------------|----------------|---------------|----------------|---------------|-------------------|------------------|-----------------------|----------------------|----------------------------|---------------------------|------------------------|-----------------------|
| 1    | H2_Letter-Number Span | P_Letter-Number Span | H2_Verbal learning | P_Verbal learning | H2_Abstraction | P_Abstraction | H2_Face memory | P_Face memory | H2_Spatial memory | P_Spatial memory | H2_Spatial processing | P_Spatial processing | H2_Sensori-motor dexterity | P_Sensori-motor dexterity | H2_Emotion recognition | P_Emotion recognition |
| 1124 | 0.08%                 | 0.6                  | 0.01%              | 0.88              | 0.03%          | 0.7           | 0.43%          | 0.2           | 0.36%             | 0.29             | 0.14%                 | 0.53                 | 1.17%                      | 0.05                      | 0.37%                  | 0.3                   |
| 1125 | 0.31%                 | 0.3                  | 0.01%              | 0.87              | 0.09%          | 0.6           | 0.02%          | 0.8           | 0.81%             | 0.105            | 0.20%                 | 0.44                 | 1.71%                      | 0.02                      | 0.71%                  | 0.13                  |
| 1126 | 0.11%                 | 0.5                  | 0.31%              | 0.3               | 0.03%          | 0.8           | 0.05%          | 0.7           | 0.05%             | 0.69             | 0.07%                 | 0.66                 | 0.13%                      | 0.5                       | 0.10%                  | 0.6                   |
| 1127 | 0.04%                 | 0.7                  | 0.04%              | 0.7               | 0.99%          | 0.07          | 0.42%          | 0.2           | 0.98%             | 0.081            | 0.03%                 | 0.78                 | 0.90%                      | 0.09                      | 0.61%                  | 0.2                   |
| 1128 | 0.03%                 | 0.7                  | 0.01%              | 0.88              | 0.06%          | 0.6           | 0.01%          | 0.9           | 0.00%             | 0.94             | 0.14%                 | 0.53                 | 0.00%                      | 1                         | 0.55%                  | 0.2                   |
| 1129 | 0.05%                 | 0.7                  | 0.12%              | 0.53              | 0.01%          | 0.8           | 0.18%          | 0.5           | 0.38%             | 0.3              | 0.16%                 | 0.51                 | 0.05%                      | 0.7                       | 0.21%                  | 0.4                   |
| 1130 | 0.29%                 | 0.3                  | 0.20%              | 0.39              | 0.02%          | 0.8           | 0.01%          | 0.9           | 0.14%             | 0.48             | 1.39%                 | 0.036                | 0.02%                      | 0.8                       | 0.04%                  | 0.7                   |
| 1131 | 0.03%                 | 0.8                  | 1.06%              | 0.057             | 0.39%          | 0.3           | 0.03%          | 0.8           | 0.27%             | 0.35             | 0.20%                 | 0.44                 | 0.62%                      | 0.15                      | 0.24%                  | 0.4                   |
| 1132 | 0.37%                 | 0.3                  | 0.04%              | 0.72              | 0.16%          | 0.5           | 0.06%          | 0.6           | 0.11%             | 0.57             | 2.23%                 | 0.0119               | 1.11%                      | 0.06                      | 0.67%                  | 0.15                  |
| 1133 | 0.35%                 | 0.3                  | 0.02%              | 0.82              | 0.03%          | 0.8           | 0.00%          | 0.9           | 0.04%             | 0.73             | 0.23%                 | 0.42                 | 0.42%                      | 0.2                       | 0.39%                  | 0.3                   |
| 1134 | 0.08%                 | 0.6                  | 0.86%              | 0.075             | 0.91%          | 0.08          | 0.35%          | 0.3           | 0.02%             | 0.82             | 0.12%                 | 0.54                 | 0.22%                      | 0.4                       | 0.05%                  | 0.7                   |
| 1135 | 0.10%                 | 0.5                  | 0.43%              | 0.22              | 0.40%          | 0.3           | 0.09%          | 0.6           | 0.23%             | 0.39             | 0.09%                 | 0.61                 | 0.68%                      | 0.15                      | 1.34%                  | 0.04                  |
| 1136 | 0.02%                 | 0.8                  | 0.92%              | 0.07              | 0.34%          | 0.3           | 0.40%          | 0.2           | 0.04%             | 0.7              | 0.16%                 | 0.49                 | 0.28%                      | 0.3                       | 0.08%                  | 0.6                   |
| 1137 | 0.61%                 | 0.14                 | 0.80%              | 0.098             | 0.34%          | 0.3           | 0.02%          | 0.8           | 0.01%             | 0.85             | 1.17%                 | 0.078                | 0.33%                      | 0.3                       | 0.00%                  | 0.9                   |
| 1138 | 0.71%                 | 0.12                 | 2.57%              | 0.0025            | 0.43%          | 0.2           | 0.21%          | 0.4           | 1.62%             | 0.022            | 0.01%                 | 0.83                 | 0.16%                      | 0.5                       | 0.28%                  | 0.3                   |
| 1139 | 0.04%                 | 0.7                  | 0.04%              | 0.71              | 0.04%          | 0.7           | 0.00%          | 1             | 0.04%             | 0.71             | 0.54%                 | 0.21                 | 0.01%                      | 0.8                       | 0.02%                  | 0.8                   |
| 1140 | 0.72%                 | 0.11                 | 0.56%              | 0.17              | 0.01%          | 0.9           | 0.08%          | 0.6           | 0.01%             | 0.83             | 0.17%                 | 0.48                 | 0.14%                      | 0.5                       | 0.03%                  | 0.7                   |
| 1141 | 0.15%                 | 0.5                  | 0.13%              | 0.49              | 0.13%          | 0.4           | 0.04%          | 0.6           | 0.03%             | 0.75             | 0.06%                 | 0.67                 | 0.13%                      | 0.5                       | 0.16%                  | 0.4                   |
| 1142 |                       |                      |                    |                   |                |               |                |               |                   |                  |                       |                      |                            |                           |                        |                       |
| 1143 | 0.08%                 | 0.6                  | 0.01%              | 0.86              | 1.00%          | 0.05          | 0.31%          | 0.3           | 0.15%             | 0.49             | 0.65%                 | 0.16                 | 0.18%                      | 0.4                       | 1.47%                  | 0.03                  |
| 1144 | 0.11%                 | 0.5                  | 0.19%              | 0.39              | 0.00%          | 1             | 0.78%          | 0.09          | 0.25%             | 0.35             | 0.76%                 | 0.112                | 0.00%                      | 0.9                       | 0.33%                  | 0.2                   |
| 1145 | 0.04%                 | 0.7                  | 0.01%              | 0.83              | 0.02%          | 0.8           | 0.00%          | 1             | 0.02%             | 0.79             | 1.61%                 | 0.032                | 0.05%                      | 0.7                       | 0.06%                  | 0.7                   |
| 1146 | 0.10%                 | 0.6                  | 0.02%              | 0.77              | 0.02%          | 0.8           | 0.13%          | 0.5           | 0.46%             | 0.22             | 1.34%                 | 0.043                | 0.12%                      | 0.5                       | 1.21%                  | 0.04                  |
| 1147 | 0.05%                 | 0.7                  | 0.00%              | 0.95              | 0.43%          | 0.2           | 0.18%          | 0.4           | 0.03%             | 0.78             | 0.56%                 | 0.22                 | 0.08%                      | 0.6                       | 0.00%                  | 1                     |
| 1148 | 0.04%                 | 0.7                  | 0.01%              | 0.85              | 0.08%          | 0.6           | 0.36%          | 0.2           | 0.43%             | 0.24             | 0.77%                 | 0.138                | 0.01%                      | 0.9                       | 0.41%                  | 0.2                   |
| 1149 | 0.19%                 | 0.4                  | 0.08%              | 0.58              | 0.00%          | 1             | 0.01%          | 0.9           | 0.01%             | 0.84             | 0.11%                 | 0.57                 | 0.63%                      | 0.14                      | 0.02%                  | 0.8                   |
| 1150 | 0.04%                 | 0.7                  | 0.00%              | 0.95              | 0.24%          | 0.4           | 0.07%          | 0.6           | 0.01%             | 0.86             | 0.00%                 | 0.97                 | 0.11%                      | 0.5                       | 0.13%                  | 0.5                   |
| 1151 | 0.11%                 | 0.5                  | 0.00%              | 0.94              | 0.37%          | 0.3           | 0.14%          | 0.5           | 0.50%             | 0.21             | 1.25%                 | 0.055                | 0.19%                      | 0.4                       | 0.16%                  | 0.5                   |
| 1152 | 0.11%                 | 0.5                  | 0.01%              | 0.85              | 0.42%          | 0.2           | 0.01%          | 0.8           | 0.31%             | 0.31             | 1.20%                 | 0.053                | 0.36%                      | 0.3                       | 0.35%                  | 0.3                   |
| 1153 | 0.02%                 | 0.8                  | 0.03%              | 0.76              | 0.00%          | 0.9           | 0.20%          | 0.4           | 0.54%             | 0.18             | 0.18%                 | 0.45                 | 0.70%                      | 0.11                      | 0.81%                  | 0.09                  |
| 1154 | 0.05%                 | 0.7                  | 0.11%              | 0.54              | 0.02%          | 0.8           | 0.05%          | 0.7           | 0.30%             | 0.34             | 0.15%                 | 0.51                 | 0.09%                      | 0.6                       | 0.32%                  | 0.3                   |
| 1155 | 0.01%                 | 0.8                  | 0.00%              | 0.91              | 0.11%          | 0.6           | 0.00%          | 0.9           | 0.25%             | 0.37             | 0.14%                 | 0.51                 | 0.16%                      | 0.5                       | 0.00%                  | 1                     |
| 1156 | 0.13%                 | 0.5                  | 0.01%              | 0.85              | 0.20%          | 0.4           | 0.01%          | 0.9           | 0.22%             | 0.4              | 0.04%                 | 0.72                 | 1.18%                      | 0.05                      | 0.05%                  | 0.7                   |

|      | A   | B      | C          | D             | E             | F                      | G                | H                | I                      | J                     | K                  | L                 | M              | N             | O                         | P                        |
|------|-----|--------|------------|---------------|---------------|------------------------|------------------|------------------|------------------------|-----------------------|--------------------|-------------------|----------------|---------------|---------------------------|--------------------------|
| 1    | Chr | Gene   | SNP ID     | Position (bp) | Position (cM) | Minor allele frequency | Hardy-Weinberg P | Reference allele | H2_Prepulse inhibition | P_Prepulse inhibition | H2_P50 suppression | P_P50 suppression | H2_Antisaccade | P_Antisaccade | H2_Continuous performance | P_Continuous performance |
| 1157 | 12  | GRIN2B | rs1805513  | 13644916      | 31.43         | 0.08                   | 0.321            | T                | 0.05%                  | 0.69                  | 0.09%              | 0.6               | 0.04%          | 0.72          | 0.78%                     | 0.119                    |
| 1158 | 12  | GRIN2B | rs11611022 | 13673187      | 31.43         | 0.08                   | 0.298            | A                | 0.89%                  | 0.099                 | 0.02%              | 0.8               | 0.04%          | 0.73          | 0.02%                     | 0.78                     |
| 1159 | 12  | GRIN2B | rs1805543  | 13675580      | 31.43         | 0.32                   | 0.319            | A                | 0.54%                  | 0.21                  | 0.15%              | 0.5               | 0.02%          | 0.81          | 0.34%                     | 0.29                     |
| 1160 | 12  | GRIN2B | rs1805545  | 13679765      | 31.43         | 0.31                   | 1.000            | T                | 0.07%                  | 0.64                  | 0.16%              | 0.5               | 0.08%          | 0.61          | 0.01%                     | 0.87                     |
| 1161 | 12  | GRIN2B | rs1805552  | 13682595      | 31.43         | 0.21                   | 0.370            | C                | 0.85%                  | 0.102                 | 0.07%              | 0.7               | 0.56%          | 0.17          | 0.46%                     | 0.21                     |
| 1162 | 12  | GRIN2B | rs2268102  | 13713506      | 31.43         | 0.43                   | 0.180            | C                | 0.28%                  | 0.35                  | 0.02%              | 0.8               | 0.02%          | 0.8           | 0.11%                     | 0.54                     |
| 1163 | 12  | GRIN2B | rs2284406  | 13716683      | 31.43         | 0.35                   | 0.430            | T                | 0.35%                  | 0.29                  | 0.00%              | 1                 | 0.11%          | 0.55          | 1.35%                     | 0.029                    |
| 1164 | 12  | GRIN2B | rs2192972  | 13723783      | 31.43         | 0.14                   | 1.000            | A                | 1.55%                  | 0.032                 | 0.07%              | 0.7               | 0.06%          | 0.65          | 0.25%                     | 0.36                     |
| 1165 | 12  | GRIN2B | rs1158541  | 13737940      | 31.45         | 0.32                   | 0.737            | A                | 0.20%                  | 0.44                  | 0.81%              | 0.2               | 0.23%          | 0.39          | 0.11%                     | 0.55                     |
| 1166 | 12  | GRIN2B | rs2192975  | 13740061      | 31.45         | 0.34                   | 0.428            | G                | 0.23%                  | 0.39                  | 0.28%              | 0.4               | 0.00%          | 0.95          | 0.08%                     | 0.62                     |
| 1167 | 12  | GRIN2B | rs10492134 | 13750149      | 31.47         | 0.30                   | 0.723            | C                | 0.07%                  | 0.64                  | 0.44%              | 0.3               | 0.51%          | 0.2           | 0.05%                     | 0.69                     |
| 1168 | 12  | GRIN2B | rs2300253  | 13753218      | 31.47         | 0.43                   | 1.000            | C                | 0.47%                  | 0.25                  | 0.00%              | 0.9               | 0.22%          | 0.41          | 0.49%                     | 0.2                      |
| 1169 | 12  | GRIN2B | rs2284411  | 13757439      | 31.48         | 0.36                   | 1.000            | C                | 0.21%                  | 0.46                  | 0.02%              | 0.8               | 0.03%          | 0.75          | 0.05%                     | 0.7                      |
| 1170 | 12  | GRIN2B | rs741327   | 13768808      | 31.49         | 0.26                   | 0.574            | G                | 0.04%                  | 0.75                  | 0.07%              | 0.6               | 0.03%          | 0.75          | 0.21%                     | 0.39                     |
| 1171 | 12  | GRIN2B | rs2268120  | 13769155      | 31.49         | 0.09                   | 0.381            | A                | 0.69%                  | 0.123                 | 0.56%              | 0.2               | 0.73%          | 0.107         | 0.37%                     | 0.25                     |
| 1172 | 12  | GRIN2B | rs10845837 | 13771435      | 31.49         | 0.30                   | 0.056            | G                | 0.40%                  | 0.27                  | 0.41%              | 0.3               | 0.07%          | 0.63          | 0.27%                     | 0.34                     |
| 1173 | 12  | GRIN2B | rs2216128  | 13774281      | 31.50         | 0.22                   | 0.092            | T                | 0.28%                  | 0.37                  | 0.02%              | 0.8               | 0.39%          | 0.28          | 0.04%                     | 0.72                     |
| 1174 | 12  | GRIN2B | rs2268122  | 13788728      | 31.52         | 0.13                   | 0.210            | G                | 0.23%                  | 0.42                  | 0.39%              | 0.3               | 0.00%          | 0.91          | 0.53%                     | 0.18                     |
| 1175 | 12  | GRIN2B | rs10492137 | 13817153      | 31.55         | 0.26                   | 0.847            | A                | 0.00%                  | 0.99                  | 0.06%              | 0.7               | 1.00%          | 0.077         | 0.07%                     | 0.63                     |
| 1176 | 12  | GRIN2B | rs10845840 | 13822124      | 31.56         | 0.42                   | 0.102            | C                | 0.11%                  | 0.58                  | 1.09%              | 0.09              | 0.03%          | 0.76          | 0.00%                     | 0.97                     |
| 1177 | 12  | GRIN2B | rs2268127  | 13832115      | 31.57         | 0.27                   | 0.371            | T                | 0.43%                  | 0.26                  | 0.01%              | 0.9               | 0.01%          | 0.87          | 0.13%                     | 0.51                     |
| 1178 | 12  | GRIN2B | rs2284418  | 13834895      | 31.57         | 0.19                   | 0.099            | T                | 0.04%                  | 0.72                  | 0.03%              | 0.8               | 0.26%          | 0.37          | 0.02%                     | 0.81                     |
| 1179 | 12  | GRIN2B | rs220557   | 13839047      | 31.58         | 0.35                   | 0.084            | A                | 0.80%                  | 0.116                 | 0.10%              | 0.6               | 0.09%          | 0.58          | 0.01%                     | 0.89                     |
| 1180 | 12  | GRIN2B | rs220558   | 13839332      | 31.58         | 0.36                   | 0.044            | G                | 0.74%                  | 0.136                 | 0.18%              | 0.5               | 0.04%          | 0.72          | 0.20%                     | 0.42                     |
| 1181 | 12  | GRIN2B | rs2300266  | 13843034      | 31.59         | 0.12                   | 1.000            | T                | 0.03%                  | 0.79                  | 0.06%              | 0.7               | 0.15%          | 0.48          | 0.04%                     | 0.72                     |
| 1182 | 12  | GRIN2B | rs2300267  | 13843198      | 31.59         | 0.42                   | 0.188            | C                | 0.86%                  | 0.105                 | 0.01%              | 0.9               | 0.29%          | 0.34          | 0.02%                     | 0.8                      |
| 1183 | 12  | GRIN2B | rs220567   | 13845670      | 31.59         | 0.41                   | 0.548            | G                | 0.05%                  | 0.69                  | 0.67%              | 0.2               | 0.02%          | 0.8           | 0.19%                     | 0.42                     |
| 1184 | 12  | GRIN2B | rs220599   | 13866565      | 31.61         | 0.34                   | 0.026            | G                | 0.61%                  | 0.17                  | 0.23%              | 0.4               | 0.03%          | 0.74          | 0.08%                     | 0.61                     |
| 1185 | 12  | GRIN2B | rs2160733  | 13872994      | 31.62         | 0.18                   | 0.609            | A                | 0.18%                  | 0.48                  | 0.07%              | 0.7               | 0.01%          | 0.89          | 0.35%                     | 0.3                      |
| 1186 | 12  | GRIN2B | rs2284425  | 13880286      | 31.63         | 0.28                   | 0.379            | G                | 0.34%                  | 0.31                  | 0.01%              | 0.9               | 0.66%          | 0.15          | 0.45%                     | 0.21                     |
| 1187 | 12  | GRIN2B | rs2300273  | 13881701      | 31.63         | 0.45                   | 0.040            | C                | 0.24%                  | 0.41                  | 0.15%              | 0.5               | 0.46%          | 0.23          | 0.00%                     | 0.97                     |
| 1188 | 12  | GRIN2B | rs2193509  | 13887540      | 31.64         | 0.38                   | 0.225            | C                | 0.11%                  | 0.55                  | 0.08%              | 0.6               | 0.07%          | 0.63          | 0.07%                     | 0.62                     |
| 1189 | 12  | GRIN2B | rs1120905  | 13895444      | 31.65         | 0.35                   | 0.267            | T                | 0.45%                  | 0.23                  | 0.01%              | 0.9               | 0.04%          | 0.72          | 0.12%                     | 0.52                     |

|      | Q                     | R                    | S                  | T                 | U              | V             | W              | X             | Y                 | Z                | AA                    | AB                   | AC                         | AD                        | AE                     | AF                    |
|------|-----------------------|----------------------|--------------------|-------------------|----------------|---------------|----------------|---------------|-------------------|------------------|-----------------------|----------------------|----------------------------|---------------------------|------------------------|-----------------------|
| 1    | H2_Letter-Number Span | P_Letter-Number Span | H2_Verbal learning | P_Verbal learning | H2_Abstraction | P_Abstraction | H2_Face memory | P_Face memory | H2_Spatial memory | P_Spatial memory | H2_Spatial processing | P_Spatial processing | H2_Sensori-motor dexterity | P_Sensori-motor dexterity | H2_Emotion recognition | P_Emotion recognition |
| 1157 | 0.04%                 | 0.7                  | 0.46%              | 0.2               | 0.39%          | 0.2           | 0.18%          | 0.4           | 0.23%             | 0.4              | 0.00%                 | 0.98                 | 0.11%                      | 0.5                       | 1.03%                  | 0.05                  |
| 1158 | 0.04%                 | 0.7                  | 0.01%              | 0.85              | 0.03%          | 0.7           | 0.00%          | 1             | 0.43%             | 0.24             | 0.28%                 | 0.37                 | 0.74%                      | 0.11                      | 0.38%                  | 0.3                   |
| 1159 | 0.00%                 | 1                    | 0.42%              | 0.23              | 0.00%          | 0.9           | 0.02%          | 0.8           | 0.00%             | 0.94             | 0.71%                 | 0.141                | 0.04%                      | 0.7                       | 0.07%                  | 0.6                   |
| 1160 | 0.01%                 | 0.8                  | 0.01%              | 0.87              | 0.01%          | 0.8           | 0.01%          | 0.8           | 0.23%             | 0.38             | 0.02%                 | 0.8                  | 0.16%                      | 0.5                       | 0.05%                  | 0.7                   |
| 1161 | 0.14%                 | 0.5                  | 0.00%              | 0.9               | 0.23%          | 0.4           | 0.07%          | 0.6           | 0.18%             | 0.44             | 0.03%                 | 0.78                 | 1.38%                      | 0.03                      | 0.01%                  | 0.8                   |
| 1162 | 0.00%                 | 1                    | 0.28%              | 0.31              | 0.14%          | 0.5           | 0.31%          | 0.3           | 0.13%             | 0.5              | 0.06%                 | 0.66                 | 0.44%                      | 0.2                       | 0.28%                  | 0.3                   |
| 1163 | 0.00%                 | 1                    | 0.11%              | 0.51              | 0.02%          | 0.8           | 0.33%          | 0.3           | 0.02%             | 0.79             | 0.14%                 | 0.51                 | 0.26%                      | 0.3                       | 0.11%                  | 0.5                   |
| 1164 | 0.03%                 | 0.7                  | 0.03%              | 0.76              | 0.01%          | 0.9           | 0.01%          | 0.8           | 0.00%             | 0.97             | 0.05%                 | 0.7                  | 0.40%                      | 0.2                       | 0.03%                  | 0.7                   |
| 1165 | 0.04%                 | 0.7                  | 0.02%              | 0.8               | 0.02%          | 0.8           | 0.00%          | 1             | 0.01%             | 0.86             | 0.47%                 | 0.25                 | 0.30%                      | 0.3                       | 0.00%                  | 1                     |
| 1166 | 0.00%                 | 0.9                  | 0.96%              | 0.062             | 1.18%          | 0.05          | 0.53%          | 0.2           | 0.00%             | 0.99             | 0.74%                 | 0.147                | 0.38%                      | 0.3                       | 0.60%                  | 0.2                   |
| 1167 | 0.02%                 | 0.8                  | 0.36%              | 0.26              | 0.76%          | 0.11          | 0.95%          | 0.07          | 0.46%             | 0.22             | 0.74%                 | 0.131                | 0.14%                      | 0.5                       | 0.86%                  | 0.09                  |
| 1168 | 0.01%                 | 0.9                  | 0.29%              | 0.3               | 0.29%          | 0.3           | 0.35%          | 0.3           | 0.08%             | 0.61             | 0.01%                 | 0.87                 | 0.57%                      | 0.2                       | 0.04%                  | 0.7                   |
| 1169 | 0.12%                 | 0.5                  | 0.10%              | 0.55              | 0.35%          | 0.3           | 0.05%          | 0.7           | 0.00%             | 0.95             | 0.00%                 | 0.93                 | 0.31%                      | 0.3                       | 0.14%                  | 0.5                   |
| 1170 | 0.00%                 | 1                    | 0.00%              | 0.99              | 0.05%          | 0.7           | 0.01%          | 0.8           | 0.15%             | 0.47             | 0.17%                 | 0.45                 | 0.00%                      | 1                         | 0.48%                  | 0.2                   |
| 1171 | 0.42%                 | 0.2                  | 0.18%              | 0.42              | 1.09%          | 0.05          | 0.00%          | 1             | 0.05%             | 0.68             | 0.00%                 | 0.96                 | 0.71%                      | 0.11                      | 0.03%                  | 0.7                   |
| 1172 | 0.09%                 | 0.6                  | 0.04%              | 0.72              | 0.10%          | 0.6           | 0.09%          | 0.6           | 0.13%             | 0.52             | 0.50%                 | 0.22                 | 0.11%                      | 0.6                       | 0.12%                  | 0.5                   |
| 1173 | 0.21%                 | 0.4                  | 0.04%              | 0.7               | 0.77%          | 0.11          | 0.18%          | 0.4           | 0.29%             | 0.33             | 0.03%                 | 0.77                 | 0.20%                      | 0.4                       | 0.99%                  | 0.07                  |
| 1174 | 0.00%                 | 1                    | 0.48%              | 0.19              | 0.08%          | 0.6           | 0.53%          | 0.2           | 0.00%             | 0.92             | 0.15%                 | 0.47                 | 0.21%                      | 0.4                       | 0.74%                  | 0.11                  |
| 1175 | 0.38%                 | 0.2                  | 0.16%              | 0.45              | 0.53%          | 0.2           | 1.03%          | 0.06          | 0.01%             | 0.86             | 0.57%                 | 0.19                 | 0.26%                      | 0.4                       | 3.70%                  | 0.0004                |
| 1176 | 0.00%                 | 0.9                  | 0.27%              | 0.32              | 0.04%          | 0.7           | 0.45%          | 0.2           | 0.10%             | 0.57             | 0.20%                 | 0.42                 | 0.02%                      | 0.8                       | 2.66%                  | 0.003                 |
| 1177 | 0.00%                 | 0.9                  | 0.56%              | 0.17              | 0.21%          | 0.4           | 0.10%          | 0.6           | 0.96%             | 0.082            | 0.00%                 | 0.97                 | 0.11%                      | 0.5                       | 0.67%                  | 0.14                  |
| 1178 | 0.18%                 | 0.4                  | 0.08%              | 0.58              | 0.01%          | 0.9           | 0.01%          | 0.8           | 0.48%             | 0.2              | 0.10%                 | 0.58                 | 0.30%                      | 0.3                       | 0.20%                  | 0.4                   |
| 1179 | 0.02%                 | 0.8                  | 1.02%              | 0.054             | 0.03%          | 0.7           | 0.07%          | 0.6           | 0.79%             | 0.1              | 0.12%                 | 0.52                 | 0.00%                      | 1                         | 0.57%                  | 0.2                   |
| 1180 | 0.01%                 | 0.9                  | 1.02%              | 0.057             | 0.03%          | 0.8           | 0.00%          | 1             | 0.46%             | 0.22             | 0.24%                 | 0.39                 | 0.02%                      | 0.8                       | 0.49%                  | 0.2                   |
| 1181 | 0.02%                 | 0.8                  | 0.41%              | 0.23              | 0.01%          | 0.8           | 0.02%          | 0.8           | 0.05%             | 0.68             | 0.52%                 | 0.22                 | 0.62%                      | 0.2                       | 0.46%                  | 0.2                   |
| 1182 | 0.09%                 | 0.6                  | 1.11%              | 0.048             | 1.30%          | 0.04          | 0.18%          | 0.4           | 1.21%             | 0.045            | 0.00%                 | 0.95                 | 0.03%                      | 0.7                       | 0.10%                  | 0.6                   |
| 1183 | 0.02%                 | 0.8                  | 0.32%              | 0.27              | 0.18%          | 0.4           | 0.48%          | 0.2           | 0.63%             | 0.133            | 0.01%                 | 0.85                 | 0.17%                      | 0.4                       | 0.74%                  | 0.1                   |
| 1184 | 0.01%                 | 0.9                  | 1.26%              | 0.032             | 0.10%          | 0.6           | 0.03%          | 0.7           | 0.40%             | 0.24             | 0.31%                 | 0.31                 | 0.00%                      | 1                         | 0.28%                  | 0.3                   |
| 1185 | 0.27%                 | 0.3                  | 0.25%              | 0.37              | 0.28%          | 0.3           | 0.17%          | 0.5           | 0.04%             | 0.72             | 0.17%                 | 0.47                 | 0.03%                      | 0.8                       | 0.40%                  | 0.3                   |
| 1186 | 0.11%                 | 0.5                  | 0.01%              | 0.87              | 0.01%          | 0.9           | 0.20%          | 0.4           | 0.80%             | 0.104            | 0.39%                 | 0.26                 | 0.02%                      | 0.8                       | 0.00%                  | 0.9                   |
| 1187 | 0.06%                 | 0.6                  | 0.31%              | 0.29              | 0.20%          | 0.4           | 0.00%          | 0.9           | 1.38%             | 0.032            | 0.02%                 | 0.81                 | 0.27%                      | 0.3                       | 0.90%                  | 0.08                  |
| 1188 | 0.26%                 | 0.3                  | 1.36%              | 0.025             | 0.01%          | 0.9           | 0.11%          | 0.5           | 0.45%             | 0.21             | 0.02%                 | 0.8                  | 0.10%                      | 0.5                       | 0.98%                  | 0.06                  |
| 1189 | 0.26%                 | 0.3                  | 2.18%              | 0.0043            | 0.14%          | 0.5           | 0.17%          | 0.4           | 1.13%             | 0.045            | 0.01%                 | 0.88                 | 0.02%                      | 0.8                       | 1.08%                  | 0.05                  |



|      | A   | B       | C          | D             | E             | F                      | G                | H                | I                      | J                     | K                  | L                 | M              | N             | O                         | P                        |
|------|-----|---------|------------|---------------|---------------|------------------------|------------------|------------------|------------------------|-----------------------|--------------------|-------------------|----------------|---------------|---------------------------|--------------------------|
| 1    | Chr | Gene    | SNP ID     | Position (bp) | Position (cM) | Minor allele frequency | Hardy-Weinberg P | Reference allele | H2_Prepulse inhibition | P_Prepulse inhibition | H2_P50 suppression | P_P50 suppression | H2_Antisaccade | P_Antisaccade | H2_Continuous performance | P_Continuous performance |
| 1190 | 12  | GRIN2B  | rs2193511  | 13896054      | 31.65         | 0.36                   | 0.200            | G                | 0.42%                  | 0.28                  | 0.02%              | 0.8               | 0.25%          | 0.38          | 0.02%                     | 0.78                     |
| 1191 | 12  | GRIN2B  | rs2284428  | 13901181      | 31.66         | 0.14                   | 1.000            | A                | 0.03%                  | 0.78                  | 0.00%              | 0.9               | 0.39%          | 0.28          | 0.05%                     | 0.7                      |
| 1192 | 12  | GRIN2B  | rs10772713 | 13903800      | 31.66         | 0.38                   | 0.218            | G                | 0.19%                  | 0.46                  | 0.14%              | 0.6               | 0.52%          | 0.21          | 0.02%                     | 0.81                     |
| 1193 | 12  | GRIN2B  | rs2300279  | 13907309      | 31.67         | 0.30                   | 0.288            | A                | 0.17%                  | 0.5                   | 0.18%              | 0.5               | 0.16%          | 0.48          | 0.39%                     | 0.28                     |
| 1194 | 12  | GRIN2B  | rs7301328  | 13910044      | 31.67         | 0.44                   | 0.303            | G                | 0.20%                  | 0.42                  | 0.00%              | 0.9               | 0.07%          | 0.62          | 0.12%                     | 0.52                     |
| 1195 | 12  | GRIN2B  | rs10845852 | 13918404      | 31.68         | 0.17                   | 0.790            | C                | 0.13%                  | 0.55                  | 0.10%              | 0.6               | 0.95%          | 0.087         | 0.00%                     | 0.99                     |
| 1196 | 12  | GRIN2B  | rs10772715 | 13929270      | 31.69         | 0.41                   | 0.007            | G                | 0.03%                  | 0.77                  | 0.06%              | 0.7               | 0.00%          | 0.92          | 0.10%                     | 0.58                     |
| 1197 | 12  | GRIN2B  | rs10492141 | 13936517      | 31.70         | 0.31                   | 0.056            | T                | 0.39%                  | 0.29                  | 0.02%              | 0.8               | 0.09%          | 0.58          | 0.16%                     | 0.47                     |
| 1198 | 12  | GRIN2B  | rs11055673 | 13945279      | 31.72         | 0.17                   | 0.301            | G                | 0.11%                  | 0.56                  | 0.26%              | 0.4               | 0.04%          | 0.7           | 0.22%                     | 0.4                      |
| 1199 | 12  | GRIN2B  | rs4764038  | 13953904      | 31.73         | 0.23                   | 0.843            | G                | 0.01%                  | 0.86                  | 0.00%              | 1                 | 0.85%          | 0.084         | 0.04%                     | 0.69                     |
| 1200 | 12  | GRIN2B  | rs2216344  | 13961423      | 31.74         | 0.47                   | 0.243            | G                | 0.07%                  | 0.64                  | 0.83%              | 0.14              | 0.55%          | 0.18          | 0.01%                     | 0.83                     |
| 1201 | 12  | GRIN2B  | rs2160729  | 13963111      | 31.74         | 0.28                   | 1.000            | T                | 0.16%                  | 0.47                  | 0.03%              | 0.8               | 1.20%          | 0.045         | 0.02%                     | 0.81                     |
| 1202 | 12  | GRIN2B  | rs219891   | 13977415      | 31.76         | 0.13                   | 1.000            | C                | 1.04%                  | 0.083                 | 0.03%              | 0.8               | 0.13%          | 0.5           | 0.00%                     | 0.98                     |
| 1203 | 12  | GRIN2B  | rs219904   | 13984155      | 31.76         | 0.46                   | 0.770            | C                | 0.24%                  | 0.37                  | 0.00%              | 0.9               | 0.25%          | 0.35          | 0.12%                     | 0.51                     |
| 1204 | 12  | GRIN2B  | rs219912   | 13986655      | 31.77         | 0.41                   | 0.460            | G                | 0.41%                  | 0.25                  | 0.04%              | 0.7               | 0.58%          | 0.16          | 0.00%                     | 0.92                     |
| 1205 | 12  | GRIN2B  | rs219934   | 14004982      | 31.79         | 0.46                   | 0.883            | G                | 0.45%                  | 0.23                  | 0.02%              | 0.8               | 0.17%          | 0.44          | 0.16%                     | 0.45                     |
| 1206 | 12  | GRIN2B  | rs12829455 | 14005924      | 31.79         | 0.49                   | 0.385            | G                | 0.51%                  | 0.2                   | 0.01%              | 0.9               | 0.40%          | 0.23          | 0.03%                     | 0.74                     |
| 1207 | 12  | GRIN2B  | rs1895056  | 14029302      | 31.82         | 0.26                   | 0.849            | T                | 0.05%                  | 0.71                  | 1.01%              | 0.12              | 0.05%          | 0.69          | 0.01%                     | 0.86                     |
| 1208 | 12  | BLOC1S1 | rs4457792  | 54396053      | 73.66         | 0.07                   | 0.576            | G                | 0.44%                  | 0.25                  | 0.16%              | 0.5               | 0.02%          | 0.81          | 0.00%                     | 0.92                     |
| 1209 | 12  | BLOC1S1 | rs941022   | 54397591      | 73.66         | 0.49                   | 0.006            | G                | 0.32%                  | 0.31                  | 0.05%              | 0.7               | 0.10%          | 0.56          | 0.04%                     | 0.69                     |
| 1210 | 12  | BLOC1S1 | rs3138136  | 54403837      | 73.66         | 0.06                   | 1.000            | G                | 0.13%                  | 0.53                  | 0.04%              | 0.7               | 0.00%          | 0.9           | 0.15%                     | 0.47                     |
| 1211 | 12  | EEA1    | rs10507017 | 91689067      | 106.36        | 0.08                   | 1.000            | G                | 1.21%                  | 0.054                 | 0.88%              | 0.14              | 0.83%          | 0.099         | 0.04%                     | 0.71                     |
| 1212 | 12  | EEA1    | rs10507018 | 91699244      | 106.37        | 0.13                   | 0.765            | A                | 0.00%                  | 0.93                  | 0.02%              | 0.8               | 0.12%          | 0.53          | 0.01%                     | 0.89                     |
| 1213 | 12  | EEA1    | rs11106700 | 91713188      | 106.39        | 0.37                   | 0.647            | T                | 0.15%                  | 0.52                  | 0.07%              | 0.7               | 0.44%          | 0.23          | 0.03%                     | 0.77                     |
| 1214 | 12  | EEA1    | rs1995169  | 91769607      | 106.46        | 0.06                   | 0.439            | A                | 1.14%                  | 0.066                 | 0.03%              | 0.8               | 0.16%          | 0.48          | 0.51%                     | 0.19                     |
| 1215 | 12  | EEA1    | rs7965897  | 91783407      | 106.48        | 0.07                   | 0.209            | G                | 0.45%                  | 0.29                  | 0.65%              | 0.3               | 0.04%          | 0.73          | 0.29%                     | 0.31                     |
| 1216 | 12  | DAO     | rs2070587  | 107801872     | 131.20        | 0.24                   | 1.000            | T                | 0.00%                  | 0.96                  | 0.47%              | 0.3               | 0.01%          | 0.89          | 0.00%                     | 0.98                     |
| 1217 | 12  | DAO     | rs6539458  | 107804967     | 131.20        | 0.06                   | 0.450            | C                | 0.61%                  | 0.22                  | 0.16%              | 0.5               | 0.12%          | 0.54          | 0.00%                     | 0.99                     |
| 1218 | 12  | DAO     | rs11830725 | 107811857     | 131.21        | 0.10                   | 0.687            | T                | 0.18%                  | 0.52                  | 0.03%              | 0.8               | 0.06%          | 0.69          | 0.05%                     | 0.71                     |
| 1219 | 12  | DAO     | rs3918347  | 107817449     | 131.22        | 0.30                   | 0.860            | A                | 0.67%                  | 0.17                  | 1.21%              | 0.08              | 0.71%          | 0.144         | 0.02%                     | 0.83                     |
| 1220 | 13  | HTR2A   | rs7333412  | 46301361      | 48.87         | 0.27                   | 0.057            | A                | 0.02%                  | 0.82                  | 0.53%              | 0.2               | 0.09%          | 0.61          | 0.33%                     | 0.29                     |
| 1221 | 13  | HTR2A   | rs3125     | 46306852      | 48.92         | 0.14                   | 1.000            | G                | 0.32%                  | 0.32                  | 0.09%              | 0.6               | 0.01%          | 0.87          | 0.12%                     | 0.54                     |
| 1222 | 13  | HTR2A   | rs977003   | 46313002      | 48.93         | 0.46                   | 0.770            | T                | 0.35%                  | 0.32                  | 0.60%              | 0.2               | 0.02%          | 0.83          | 0.01%                     | 0.86                     |

|      | Q                     | R                    | S                  | T                 | U              | V             | W              | X             | Y                 | Z                | AA                    | AB                   | AC                         | AD                        | AE                     | AF                    |
|------|-----------------------|----------------------|--------------------|-------------------|----------------|---------------|----------------|---------------|-------------------|------------------|-----------------------|----------------------|----------------------------|---------------------------|------------------------|-----------------------|
| 1    | H2_Letter-Number Span | P_Letter-Number Span | H2_Verbal learning | P_Verbal learning | H2_Abstraction | P_Abstraction | H2_Face memory | P_Face memory | H2_Spatial memory | P_Spatial memory | H2_Spatial processing | P_Spatial processing | H2_Sensori-motor dexterity | P_Sensori-motor dexterity | H2_Emotion recognition | P_Emotion recognition |
| 1190 | 0.96%                 | 0.07                 | 1.50%              | 0.026             | 0.00%          | 0.9           | 0.07%          | 0.6           | 0.01%             | 0.84             | 0.06%                 | 0.69                 | 0.03%                      | 0.8                       | 0.06%                  | 0.7                   |
| 1191 | 0.12%                 | 0.5                  | 0.45%              | 0.22              | 0.90%          | 0.09          | 0.00%          | 1             | 0.05%             | 0.7              | 0.01%                 | 0.9                  | 0.06%                      | 0.7                       | 0.08%                  | 0.6                   |
| 1192 | 0.27%                 | 0.3                  | 1.75%              | 0.0144            | 0.00%          | 1             | 0.08%          | 0.6           | 0.00%             | 0.92             | 0.00%                 | 1                    | 0.72%                      | 0.13                      | 0.25%                  | 0.4                   |
| 1193 | 0.60%                 | 0.2                  | 1.60%              | 0.022             | 0.00%          | 0.9           | 0.10%          | 0.6           | 0.00%             | 0.92             | 0.34%                 | 0.33                 | 0.06%                      | 0.7                       | 0.26%                  | 0.4                   |
| 1194 | 0.00%                 | 0.9                  | 1.17%              | 0.039             | 0.18%          | 0.4           | 0.03%          | 0.7           | 0.53%             | 0.18             | 0.33%                 | 0.3                  | 0.01%                      | 0.9                       | 0.01%                  | 0.8                   |
| 1195 | 0.04%                 | 0.7                  | 1.40%              | 0.028             | 0.42%          | 0.2           | 0.27%          | 0.4           | 0.15%             | 0.5              | 0.07%                 | 0.65                 | 1.09%                      | 0.06                      | 0.16%                  | 0.5                   |
| 1196 | 0.19%                 | 0.4                  | 0.86%              | 0.082             | 0.09%          | 0.6           | 0.36%          | 0.3           | 0.00%             | 0.93             | 0.29%                 | 0.35                 | 0.12%                      | 0.5                       | 1.05%                  | 0.06                  |
| 1197 | 0.36%                 | 0.3                  | 1.94%              | 0.0087            | 0.09%          | 0.6           | 0.28%          | 0.3           | 0.24%             | 0.38             | 0.06%                 | 0.68                 | 0.03%                      | 0.8                       | 0.57%                  | 0.2                   |
| 1198 | 0.41%                 | 0.2                  | 2.26%              | 0.0037            | 0.03%          | 0.7           | 0.95%          | 0.06          | 0.03%             | 0.75             | 0.01%                 | 0.89                 | 0.02%                      | 0.8                       | 0.47%                  | 0.2                   |
| 1199 | 0.17%                 | 0.4                  | 1.29%              | 0.025             | 0.04%          | 0.7           | 0.53%          | 0.2           | 1.05%             | 0.052            | 0.00%                 | 0.99                 | 0.02%                      | 0.8                       | 1.17%                  | 0.04                  |
| 1200 | 0.54%                 | 0.2                  | 2.00%              | 0.0059            | 0.00%          | 1             | 0.21%          | 0.4           | 0.15%             | 0.46             | 0.12%                 | 0.53                 | 0.05%                      | 0.7                       | 0.03%                  | 0.7                   |
| 1201 | 0.36%                 | 0.2                  | 1.62%              | 0.0142            | 0.07%          | 0.6           | 0.20%          | 0.4           | 0.66%             | 0.131            | 0.03%                 | 0.78                 | 0.00%                      | 0.9                       | 0.64%                  | 0.13                  |
| 1202 | 0.01%                 | 0.9                  | 0.43%              | 0.2               | 0.73%          | 0.12          | 0.01%          | 0.8           | 0.04%             | 0.7              | 0.02%                 | 0.81                 | 0.00%                      | 1                         | 0.01%                  | 0.8                   |
| 1203 | 0.15%                 | 0.4                  | 1.88%              | 0.007             | 0.00%          | 0.9           | 0.00%          | 0.9           | 0.14%             | 0.48             | 0.60%                 | 0.149                | 0.09%                      | 0.6                       | 0.06%                  | 0.6                   |
| 1204 | 0.62%                 | 0.12                 | 0.63%              | 0.118             | 0.13%          | 0.5           | 0.05%          | 0.7           | 0.53%             | 0.18             | 0.57%                 | 0.17                 | 0.08%                      | 0.6                       | 0.36%                  | 0.3                   |
| 1205 | 0.23%                 | 0.4                  | 1.92%              | 0.0076            | 0.02%          | 0.8           | 0.10%          | 0.5           | 0.12%             | 0.52             | 0.48%                 | 0.21                 | 0.04%                      | 0.7                       | 0.03%                  | 0.7                   |
| 1206 | 0.71%                 | 0.1                  | 2.45%              | 0.002             | 0.06%          | 0.6           | 0.00%          | 1             | 0.37%             | 0.24             | 0.37%                 | 0.26                 | 0.01%                      | 0.9                       | 0.25%                  | 0.3                   |
| 1207 | 0.39%                 | 0.3                  | 0.01%              | 0.85              | 0.33%          | 0.3           | 0.10%          | 0.6           | 0.30%             | 0.33             | 0.47%                 | 0.24                 | 0.08%                      | 0.6                       | 0.00%                  | 0.9                   |
| 1208 | 0.21%                 | 0.4                  | 0.05%              | 0.67              | 1.54%          | 0.02          | 0.02%          | 0.8           | 0.01%             | 0.83             | 0.14%                 | 0.5                  | 0.05%                      | 0.7                       | 0.01%                  | 0.9                   |
| 1209 | 0.03%                 | 0.8                  | 0.24%              | 0.35              | 0.14%          | 0.5           | 0.00%          | 0.9           | 0.00%             | 0.96             | 0.00%                 | 0.98                 | 0.01%                      | 0.8                       | 0.00%                  | 1                     |
| 1210 | 0.14%                 | 0.5                  | 0.02%              | 0.81              | 0.49%          | 0.2           | 0.14%          | 0.5           | 0.00%             | 0.95             | 0.46%                 | 0.23                 | 0.03%                      | 0.7                       | 0.08%                  | 0.6                   |
| 1211 | 0.53%                 | 0.2                  | 0.18%              | 0.43              | 0.27%          | 0.3           | 0.01%          | 0.9           | 0.16%             | 0.48             | 0.38%                 | 0.3                  | 0.36%                      | 0.3                       | 0.53%                  | 0.2                   |
| 1212 | 0.88%                 | 0.07                 | 0.03%              | 0.75              | 0.36%          | 0.3           | 0.43%          | 0.2           | 0.17%             | 0.45             | 0.07%                 | 0.64                 | 0.33%                      | 0.3                       | 0.57%                  | 0.2                   |
| 1213 | 0.12%                 | 0.5                  | 0.00%              | 0.99              | 0.17%          | 0.5           | 0.30%          | 0.3           | 0.04%             | 0.7              | 0.29%                 | 0.34                 | 0.46%                      | 0.2                       | 0.00%                  | 1                     |
| 1214 | 0.26%                 | 0.3                  | 0.43%              | 0.23              | 1.07%          | 0.07          | 0.16%          | 0.5           | 0.00%             | 0.97             | 0.30%                 | 0.38                 | 0.17%                      | 0.5                       | 1.04%                  | 0.07                  |
| 1215 | 0.70%                 | 0.1                  | 0.08%              | 0.6               | 0.04%          | 0.7           | 0.31%          | 0.3           | 0.15%             | 0.48             | 0.08%                 | 0.61                 | 0.00%                      | 0.9                       | 0.05%                  | 0.7                   |
| 1216 | 0.23%                 | 0.4                  | 0.00%              | 0.93              | 0.64%          | 0.14          | 0.00%          | 1             | 0.36%             | 0.29             | 0.99%                 | 0.091                | 0.20%                      | 0.4                       | 0.94%                  | 0.08                  |
| 1217 | 0.78%                 | 0.1                  | 0.00%              | 0.98              | 0.90%          | 0.09          | 0.07%          | 0.6           | 0.00%             | 0.98             | 0.23%                 | 0.42                 | 1.68%                      | 0.02                      | 0.00%                  | 1                     |
| 1218 | 0.07%                 | 0.6                  | 0.38%              | 0.28              | 1.68%          | 0.02          | 0.13%          | 0.5           | 0.20%             | 0.45             | 0.56%                 | 0.22                 | 4.99%                      | 0.00011                   | 0.31%                  | 0.3                   |
| 1219 | 0.53%                 | 0.2                  | 0.50%              | 0.19              | 0.27%          | 0.4           | 0.10%          | 0.6           | 0.57%             | 0.19             | 0.02%                 | 0.82                 | 0.15%                      | 0.5                       | 0.91%                  | 0.09                  |
| 1220 | 0.00%                 | 0.9                  | 0.02%              | 0.77              | 0.04%          | 0.7           | 0.13%          | 0.5           | 0.05%             | 0.69             | 0.14%                 | 0.52                 | 0.03%                      | 0.7                       | 0.15%                  | 0.5                   |
| 1221 | 0.08%                 | 0.6                  | 0.02%              | 0.81              | 0.05%          | 0.7           | 0.00%          | 1             | 0.13%             | 0.52             | 0.01%                 | 0.85                 | 0.31%                      | 0.3                       | 0.05%                  | 0.7                   |
| 1222 | 0.05%                 | 0.7                  | 0.17%              | 0.46              | 0.01%          | 0.8           | 0.38%          | 0.3           | 0.00%             | 0.91             | 0.10%                 | 0.59                 | 0.27%                      | 0.4                       | 0.00%                  | 0.9                   |

|      | A   | B      | C          | D             | E             | F                      | G                | H                | I                      | J                     | K                  | L                 | M              | N             | O                         | P                        |
|------|-----|--------|------------|---------------|---------------|------------------------|------------------|------------------|------------------------|-----------------------|--------------------|-------------------|----------------|---------------|---------------------------|--------------------------|
| 1    | Chr | Gene   | SNP ID     | Position (bp) | Position (cM) | Minor allele frequency | Hardy-Weinberg P | Reference allele | H2_Prepulse inhibition | P_Prepulse inhibition | H2_P50 suppression | P_P50 suppression | H2_Antisaccade | P_Antisaccade | H2_Continuous performance | P_Continuous performance |
| 1223 | 13  | HTR2A  | rs1923886  | 46321292      | 48.94         | 0.45                   | 0.465            | T                | 1.05%                  | 0.075                 | 0.00%              | 1                 | 0.25%          | 0.37          | 0.04%                     | 0.72                     |
| 1224 | 13  | HTR2A  | rs2296972  | 46326472      | 48.94         | 0.33                   | 0.609            | G                | 0.72%                  | 0.16                  | 0.03%              | 0.8               | 0.37%          | 0.28          | 0.36%                     | 0.27                     |
| 1225 | 13  | HTR2A  | rs9316233  | 46331356      | 48.95         | 0.24                   | 0.436            | C                | 0.47%                  | 0.23                  | 1.08%              | 0.09              | 2.34%          | 0.0055        | 0.61%                     | 0.14                     |
| 1226 | 13  | HTR2A  | rs659734   | 46333284      | 48.95         | 0.10                   | 0.094            | T                | 0.80%                  | 0.13                  | 0.17%              | 0.5               | 0.49%          | 0.21          | 0.39%                     | 0.25                     |
| 1227 | 13  | HTR2A  | rs1928042  | 46335217      | 48.96         | 0.24                   | 1.000            | A                | 0.04%                  | 0.74                  | 0.13%              | 0.5               | 0.77%          | 0.095         | 0.04%                     | 0.7                      |
| 1228 | 13  | HTR2A  | rs582385   | 46343995      | 48.97         | 0.17                   | 1.000            | T                | 0.03%                  | 0.76                  | 0.24%              | 0.4               | 1.20%          | 0.034         | 0.05%                     | 0.66                     |
| 1229 | 13  | HTR2A  | rs985933   | 46353864      | 48.98         | 0.39                   | 1.000            | C                | 0.06%                  | 0.67                  | 0.69%              | 0.2               | 3.67%          | 0.00047       | 0.03%                     | 0.75                     |
| 1230 | 13  | HTR2A  | rs9534505  | 46358745      | 48.99         | 0.10                   | 1.000            | G                | 0.90%                  | 0.127                 | 1.17%              | 0.08              | 1.39%          | 0.034         | 0.29%                     | 0.33                     |
| 1231 | 13  | HTR2A  | rs2070036  | 46364951      | 49.00         | 0.02                   | 0.054            | T                | 0.04%                  | 0.74                  | 1.33%              | 0.11              | 4.32%          | 0.00046       | 0.06%                     | 0.69                     |
| 1232 | 13  | HTR2A  | rs6313     | 46367941      | 49.00         | 0.42                   | 1.000            | C                | 0.31%                  | 0.35                  | 0.31%              | 0.4               | 0.78%          | 0.126         | 0.01%                     | 0.86                     |
| 1233 | 13  | HTR2A  | rs1328685  | 46369891      | 49.00         | 0.14                   | 0.250            | A                | 0.31%                  | 0.34                  | 0.02%              | 0.8               | 0.68%          | 0.135         | 0.26%                     | 0.34                     |
| 1234 | 13  | HTR2A  | rs4142900  | 46371551      | 49.01         | 0.45                   | 1.000            | G                | 0.08%                  | 0.63                  | 0.14%              | 0.6               | 0.00%          | 0.93          | 0.21%                     | 0.41                     |
| 1235 | 13  | DAOA   | rs1341402  | 104913510     | 114.27        | 0.25                   | 0.260            | T                | 0.29%                  | 0.36                  | 0.37%              | 0.3               | 0.24%          | 0.4           | 0.06%                     | 0.67                     |
| 1236 | 13  | DAOA   | rs1341403  | 104914808     | 114.29        | 0.34                   | 0.246            | C                | 0.50%                  | 0.21                  | 0.26%              | 0.4               | 0.29%          | 0.32          | 0.11%                     | 0.55                     |
| 1237 | 13  | DAOA   | rs2391191  | 104917447     | 114.33        | 0.31                   | 0.126            | G                | 0.45%                  | 0.23                  | 0.23%              | 0.4               | 0.22%          | 0.39          | 0.00%                     | 0.93                     |
| 1238 | 13  | DAOA   | rs1539070  | 104922458     | 114.41        | 0.17                   | 0.458            | C                | 0.02%                  | 0.79                  | 0.00%              | 0.9               | 1.30%          | 0.045         | 1.25%                     | 0.042                    |
| 1239 | 13  | DAOA   | rs3916968  | 104925530     | 114.42        | 0.31                   | 0.501            | G                | 0.14%                  | 0.52                  | 0.00%              | 0.9               | 1.77%          | 0.017         | 1.38%                     | 0.029                    |
| 1240 | 13  | DAOA   | rs701567   | 104939996     | 114.43        | 0.50                   | 0.248            | A                | 0.20%                  | 0.44                  | 0.01%              | 0.9               | 0.15%          | 0.48          | 0.58%                     | 0.16                     |
| 1241 | 13  | DAOA   | rs778294   | 104940236     | 114.43        | 0.33                   | 1.000            | G                | 0.04%                  | 0.72                  | 0.58%              | 0.2               | 0.14%          | 0.52          | 0.40%                     | 0.26                     |
| 1242 | 14  | AKT1   | rs2498804  | 104304140     | 126.54        | 0.31                   | 0.500            | G                | 0.00%                  | 0.97                  | 0.56%              | 0.2               | 1.13%          | 0.054         | 0.28%                     | 0.33                     |
| 1243 | 14  | AKT1   | rs2494732  | 104310237     | 126.55        | 0.40                   | 0.357            | T                | 0.41%                  | 0.28                  | 0.42%              | 0.3               | 0.93%          | 0.101         | 0.85%                     | 0.099                    |
| 1244 | 14  | AKT1   | rs1130214  | 104330779     | 126.61        | 0.28                   | 0.468            | G                | 0.07%                  | 0.66                  | 0.71%              | 0.2               | 0.23%          | 0.41          | 1.98%                     | 0.0115                   |
| 1245 | 15  | CHRNA7 | rs3087454  | 30108259      | 21.81         | 0.36                   | 0.341            | T                | 1.46%                  | 0.036                 | 0.19%              | 0.5               | 0.24%          | 0.38          | 0.34%                     | 0.28                     |
| 1246 | 15  | CHRNA7 | rs6494165  | 30108578      | 21.81         | 0.05                   | 1.000            | T                | 0.63%                  | 0.16                  | 0.00%              | 0.9               | 0.00%          | 0.93          | 0.01%                     | 0.88                     |
| 1247 | 15  | CHRNA7 | rs3826029  | 30108777      | 21.82         | 0.22                   | 0.531            | G                | 3.61%                  | 0.00065               | 0.08%              | 0.6               | 0.06%          | 0.65          | 0.14%                     | 0.47                     |
| 1248 | 15  | CHRNA7 | rs885071   | 30111868      | 21.82         | 0.21                   | 0.399            | C                | 3.64%                  | 0.00057               | 0.29%              | 0.4               | 0.03%          | 0.74          | 0.17%                     | 0.44                     |
| 1249 | 15  | CHRNA7 | rs883473   | 30112968      | 21.82         | 0.35                   | 0.424            | C                | 1.54%                  | 0.029                 | 0.01%              | 0.9               | 0.26%          | 0.36          | 0.27%                     | 0.34                     |
| 1250 | 15  | CHRNA7 | rs8037484  | 30134166      | 21.84         | 0.30                   | 0.604            | G                | 1.35%                  | 0.037                 | 0.00%              | 0.9               | 0.01%          | 0.85          | 0.18%                     | 0.42                     |
| 1251 | 15  | CHRNA7 | rs4779970  | 30137170      | 21.85         | 0.07                   | 1.000            | T                | 0.52%                  | 0.23                  | 0.10%              | 0.6               | 0.00%          | 0.92          | 0.03%                     | 0.74                     |
| 1252 | 15  | CHRNA7 | rs982574   | 30161315      | 21.87         | 0.13                   | 1.000            | C                | 0.06%                  | 0.69                  | 0.28%              | 0.4               | 0.12%          | 0.56          | 0.09%                     | 0.6                      |
| 1253 | 15  | CHRNA7 | rs12914788 | 30163729      | 21.88         | 0.11                   | 1.000            | A                | 0.31%                  | 0.36                  | 0.12%              | 0.6               | 0.18%          | 0.48          | 0.01%                     | 0.84                     |
| 1254 | 15  | CHRNA7 | rs2133965  | 30171846      | 21.88         | 0.10                   | 1.000            | C                | 0.11%                  | 0.6                   | 0.23%              | 0.4               | 0.02%          | 0.79          | 0.01%                     | 0.83                     |
| 1255 | 15  | CHRNA7 | rs8035668  | 30178638      | 21.89         | 0.20                   | 1.000            | A                | 0.01%                  | 0.85                  | 0.00%              | 1                 | 0.19%          | 0.44          | 0.11%                     | 0.54                     |

|      | Q                     | R                    | S                  | T                 | U              | V             | W              | X             | Y                 | Z                | AA                    | AB                   | AC                         | AD                        | AE                     | AF                    |
|------|-----------------------|----------------------|--------------------|-------------------|----------------|---------------|----------------|---------------|-------------------|------------------|-----------------------|----------------------|----------------------------|---------------------------|------------------------|-----------------------|
| 1    | H2_Letter-Number Span | P_Letter-Number Span | H2_Verbal learning | P_Verbal learning | H2_Abstraction | P_Abstraction | H2_Face memory | P_Face memory | H2_Spatial memory | P_Spatial memory | H2_Spatial processing | P_Spatial processing | H2_Sensori-motor dexterity | P_Sensori-motor dexterity | H2_Emotion recognition | P_Emotion recognition |
| 1223 | 0.00%                 | 0.9                  | 0.01%              | 0.88              | 0.01%          | 0.8           | 0.25%          | 0.3           | 0.16%             | 0.47             | 0.18%                 | 0.47                 | 1.53%                      | 0.02                      | 0.18%                  | 0.4                   |
| 1224 | 0.30%                 | 0.3                  | 0.02%              | 0.8               | 0.10%          | 0.6           | 0.39%          | 0.2           | 0.17%             | 0.46             | 0.00%                 | 0.93                 | 0.07%                      | 0.6                       | 0.01%                  | 0.8                   |
| 1225 | 0.02%                 | 0.8                  | 0.04%              | 0.69              | 0.60%          | 0.13          | 1.29%          | 0.03          | 0.58%             | 0.16             | 2.60%                 | 0.0037               | 0.43%                      | 0.2                       | 0.16%                  | 0.4                   |
| 1226 | 0.08%                 | 0.6                  | 0.04%              | 0.69              | 0.40%          | 0.2           | 0.22%          | 0.4           | 0.02%             | 0.78             | 0.45%                 | 0.24                 | 0.01%                      | 0.8                       | 0.01%                  | 0.8                   |
| 1227 | 0.39%                 | 0.2                  | 0.33%              | 0.26              | 0.48%          | 0.2           | 1.78%          | 0.012         | 1.64%             | 0.019            | 0.05%                 | 0.69                 | 0.25%                      | 0.4                       | 0.43%                  | 0.2                   |
| 1228 | 0.55%                 | 0.14                 | 0.23%              | 0.34              | 0.26%          | 0.3           | 1.45%          | 0.02          | 0.45%             | 0.21             | 0.02%                 | 0.81                 | 0.13%                      | 0.5                       | 0.28%                  | 0.3                   |
| 1229 | 0.29%                 | 0.3                  | 0.12%              | 0.5               | 1.02%          | 0.05          | 1.30%          | 0.03          | 1.00%             | 0.062            | 1.25%                 | 0.046                | 0.33%                      | 0.3                       | 0.03%                  | 0.8                   |
| 1230 | 0.65%                 | 0.13                 | 0.33%              | 0.29              | 0.12%          | 0.5           | 0.00%          | 1             | 0.18%             | 0.44             | 0.00%                 | 0.93                 | 0.01%                      | 0.9                       | 0.16%                  | 0.5                   |
| 1231 | 0.10%                 | 0.6                  | 0.01%              | 0.85              | 0.00%          | 1             | 0.14%          | 0.5           | 0.73%             | 0.147            | 0.24%                 | 0.43                 | 0.28%                      | 0.4                       | 0.27%                  | 0.4                   |
| 1232 | 1.99%                 | 0.009                | 0.01%              | 0.87              | 0.15%          | 0.5           | 0.03%          | 0.8           | 0.18%             | 0.45             | 0.80%                 | 0.128                | 0.00%                      | 0.9                       | 0.03%                  | 0.7                   |
| 1233 | 0.03%                 | 0.7                  | 0.25%              | 0.33              | 0.58%          | 0.13          | 0.03%          | 0.8           | 0.28%             | 0.33             | 0.80%                 | 0.112                | 0.09%                      | 0.6                       | 0.00%                  | 1                     |
| 1234 | 2.29%                 | 0.005                | 0.04%              | 0.7               | 0.01%          | 0.8           | 0.00%          | 0.9           | 0.05%             | 0.7              | 0.11%                 | 0.57                 | 0.15%                      | 0.5                       | 0.04%                  | 0.7                   |
| 1235 | 0.27%                 | 0.3                  | 0.43%              | 0.22              | 0.08%          | 0.6           | 0.02%          | 0.8           | 0.02%             | 0.83             | 0.00%                 | 0.93                 | 0.00%                      | 1                         | 0.39%                  | 0.3                   |
| 1236 | 1.83%                 | 0.01                 | 1.11%              | 0.044             | 0.88%          | 0.07          | 1.16%          | 0.04          | 1.50%             | 0.025            | 0.21%                 | 0.42                 | 0.14%                      | 0.5                       | 0.22%                  | 0.4                   |
| 1237 | 1.80%                 | 0.01                 | 1.21%              | 0.034             | 1.34%          | 0.03          | 0.77%          | 0.09          | 0.95%             | 0.072            | 0.33%                 | 0.31                 | 0.28%                      | 0.3                       | 0.07%                  | 0.6                   |
| 1238 | 0.11%                 | 0.5                  | 0.13%              | 0.5               | 0.00%          | 1             | 0.00%          | 0.9           | 0.10%             | 0.56             | 0.04%                 | 0.72                 | 0.05%                      | 0.7                       | 0.33%                  | 0.3                   |
| 1239 | 0.39%                 | 0.2                  | 1.17%              | 0.039             | 1.52%          | 0.02          | 0.04%          | 0.7           | 0.96%             | 0.078            | 0.47%                 | 0.24                 | 0.02%                      | 0.8                       | 0.02%                  | 0.8                   |
| 1240 | 0.13%                 | 0.5                  | 0.36%              | 0.25              | 0.76%          | 0.1           | 0.09%          | 0.6           | 0.18%             | 0.43             | 0.98%                 | 0.085                | 0.00%                      | 1                         | 0.20%                  | 0.4                   |
| 1241 | 1.41%                 | 0.02                 | 0.06%              | 0.66              | 0.00%          | 0.9           | 0.37%          | 0.3           | 0.01%             | 0.89             | 0.00%                 | 0.92                 | 0.58%                      | 0.2                       | 0.75%                  | 0.11                  |
| 1242 | 0.00%                 | 0.9                  | 0.10%              | 0.55              | 0.06%          | 0.7           | 1.73%          | 0.014         | 0.06%             | 0.65             | 0.54%                 | 0.2                  | 1.28%                      | 0.04                      | 0.14%                  | 0.5                   |
| 1243 | 0.00%                 | 0.9                  | 0.00%              | 0.99              | 0.05%          | 0.7           | 2.31%          | 0.006         | 0.27%             | 0.37             | 0.01%                 | 0.87                 | 0.58%                      | 0.2                       | 1.04%                  | 0.07                  |
| 1244 | 0.05%                 | 0.7                  | 0.18%              | 0.43              | 0.10%          | 0.6           | 0.74%          | 0.11          | 0.72%             | 0.121            | 0.08%                 | 0.61                 | 0.04%                      | 0.7                       | 1.09%                  | 0.05                  |
| 1245 | 0.02%                 | 0.8                  | 0.08%              | 0.59              | 0.04%          | 0.7           | 0.22%          | 0.4           | 0.06%             | 0.66             | 0.02%                 | 0.79                 | 0.02%                      | 0.8                       | 0.22%                  | 0.4                   |
| 1246 | 0.15%                 | 0.5                  | 0.02%              | 0.77              | 0.12%          | 0.5           | 0.15%          | 0.5           | 0.17%             | 0.45             | 0.45%                 | 0.24                 | 0.12%                      | 0.5                       | 0.68%                  | 0.14                  |
| 1247 | 0.06%                 | 0.6                  | 0.13%              | 0.48              | 0.28%          | 0.3           | 0.38%          | 0.2           | 0.01%             | 0.89             | 0.04%                 | 0.73                 | 0.15%                      | 0.5                       | 0.39%                  | 0.2                   |
| 1248 | 0.03%                 | 0.8                  | 0.24%              | 0.34              | 0.15%          | 0.5           | 0.49%          | 0.2           | 0.13%             | 0.51             | 0.13%                 | 0.52                 | 0.17%                      | 0.4                       | 0.50%                  | 0.2                   |
| 1249 | 0.01%                 | 0.9                  | 0.10%              | 0.54              | 0.06%          | 0.6           | 0.18%          | 0.4           | 0.16%             | 0.47             | 0.09%                 | 0.61                 | 0.04%                      | 0.7                       | 0.33%                  | 0.3                   |
| 1250 | 0.12%                 | 0.5                  | 0.12%              | 0.49              | 0.17%          | 0.4           | 0.20%          | 0.4           | 0.07%             | 0.62             | 0.00%                 | 0.97                 | 0.00%                      | 0.9                       | 0.02%                  | 0.8                   |
| 1251 | 0.42%                 | 0.2                  | 0.03%              | 0.74              | 0.03%          | 0.8           | 0.36%          | 0.3           | 0.13%             | 0.52             | 0.77%                 | 0.136                | 0.86%                      | 0.09                      | 0.81%                  | 0.1                   |
| 1252 | 0.02%                 | 0.8                  | 0.05%              | 0.7               | 0.01%          | 0.9           | 0.31%          | 0.3           | 0.10%             | 0.59             | 0.01%                 | 0.91                 | 1.71%                      | 0.02                      | 0.00%                  | 0.9                   |
| 1253 | 0.07%                 | 0.6                  | 0.07%              | 0.63              | 0.11%          | 0.6           | 0.24%          | 0.4           | 0.34%             | 0.32             | 0.02%                 | 0.83                 | 0.37%                      | 0.3                       | 0.00%                  | 1                     |
| 1254 | 0.26%                 | 0.3                  | 0.04%              | 0.71              | 0.01%          | 0.9           | 0.34%          | 0.3           | 0.01%             | 0.88             | 0.14%                 | 0.52                 | 0.26%                      | 0.3                       | 0.03%                  | 0.7                   |
| 1255 | 0.86%                 | 0.09                 | 0.17%              | 0.45              | 0.65%          | 0.15          | 0.21%          | 0.4           | 0.01%             | 0.84             | 0.96%                 | 0.102                | 0.07%                      | 0.6                       | 0.13%                  | 0.5                   |

|      | A   | B      | C          | D             | E             | F                      | G                | H                | I                      | J                     | K                  | L                 | M              | N             | O                         | P                        |
|------|-----|--------|------------|---------------|---------------|------------------------|------------------|------------------|------------------------|-----------------------|--------------------|-------------------|----------------|---------------|---------------------------|--------------------------|
| 1    | Chr | Gene   | SNP ID     | Position (bp) | Position (cM) | Minor allele frequency | Hardy-Weinberg P | Reference allele | H2_Prepulse inhibition | P_Prepulse inhibition | H2_P50 suppression | P_P50 suppression | H2_Antisaccade | P_Antisaccade | H2_Continuous performance | P_Continuous performance |
| 1256 | 15  | CHRNA7 | rs9788657  | 30182318      | 21.90         | 0.20                   | 0.810            | C                | 0.00%                  | 0.96                  | 0.01%              | 0.9               | 0.16%          | 0.47          | 0.06%                     | 0.65                     |
| 1257 | 15  | CHRNA7 | rs8028396  | 30184013      | 21.90         | 0.35                   | 1.000            | G                | 0.11%                  | 0.57                  | 0.25%              | 0.4               | 0.50%          | 0.2           | 0.02%                     | 0.81                     |
| 1258 | 15  | CHRNA7 | rs10438342 | 30189338      | 21.90         | 0.36                   | 0.529            | G                | 0.61%                  | 0.18                  | 0.00%              | 0.9               | 0.49%          | 0.21          | 0.22%                     | 0.38                     |
| 1259 | 15  | CHRNA7 | rs11858834 | 30190213      | 21.90         | 0.22                   | 1.000            | A                | 0.80%                  | 0.123                 | 0.23%              | 0.4               | 0.40%          | 0.27          | 0.01%                     | 0.86                     |
| 1260 | 15  | CHRNA7 | rs12915695 | 30190637      | 21.90         | 0.15                   | 0.009            | G                | 0.00%                  | 0.89                  | 0.02%              | 0.8               | 0.24%          | 0.3           | 0.54%                     | 0.12                     |
| 1261 | 15  | CHRNA7 | rs16956223 | 30198075      | 21.91         | 0.15                   | 0.239            | G                | 0.00%                  | 0.93                  | 0.04%              | 0.7               | 0.09%          | 0.56          | 0.03%                     | 0.75                     |
| 1262 | 15  | CHRNA7 | rs7170028  | 30212293      | 21.93         | 0.47                   | 1.000            | C                | 0.11%                  | 0.57                  | 1.13%              | 0.09              | 0.28%          | 0.34          | 0.01%                     | 0.87                     |
| 1263 | 15  | CHRNA7 | rs1909884  | 30226590      | 21.94         | 0.39                   | 0.442            | C                | 0.91%                  | 0.084                 | 0.85%              | 0.12              | 0.10%          | 0.55          | 0.23%                     | 0.36                     |
| 1264 | 15  | CHRNA7 | rs2337980  | 30231488      | 21.95         | 0.41                   | 0.457            | C                | 0.01%                  | 0.87                  | 0.16%              | 0.5               | 0.02%          | 0.8           | 0.09%                     | 0.58                     |
| 1265 | 16  | GRIN2A | rs2267770  | 9773460       | 27.74         | 0.39                   | 0.450            | C                | 0.31%                  | 0.34                  | 0.02%              | 0.8               | 0.28%          | 0.35          | 0.23%                     | 0.39                     |
| 1266 | 16  | GRIN2A | rs10492827 | 9776259       | 27.74         | 0.20                   | 0.823            | A                | 0.31%                  | 0.34                  | 0.03%              | 0.8               | 0.12%          | 0.54          | 0.60%                     | 0.16                     |
| 1267 | 16  | GRIN2A | rs9933832  | 9856135       | 27.74         | 0.31                   | 0.303            | G                | 0.03%                  | 0.78                  | 1.87%              | 0.04              | 0.36%          | 0.31          | 0.52%                     | 0.21                     |
| 1268 | 16  | GRIN2A | rs2267795  | 9878376       | 27.74         | 0.30                   | 0.379            | A                | 0.42%                  | 0.29                  | 1.15%              | 0.1               | 1.15%          | 0.075         | 0.29%                     | 0.35                     |
| 1269 | 16  | GRIN2A | rs968301   | 9881867       | 27.74         | 0.33                   | 1.000            | C                | 0.34%                  | 0.33                  | 0.78%              | 0.2               | 0.01%          | 0.87          | 0.00%                     | 0.95                     |
| 1270 | 16  | GRIN2A | rs7189130  | 9886053       | 27.74         | 0.27                   | 0.348            | A                | 0.26%                  | 0.4                   | 0.20%              | 0.5               | 0.79%          | 0.128         | 0.50%                     | 0.21                     |
| 1271 | 16  | GRIN2A | rs9938172  | 9909920       | 27.74         | 0.37                   | 0.753            | C                | 0.00%                  | 0.98                  | 0.87%              | 0.15              | 0.15%          | 0.51          | 0.63%                     | 0.17                     |
| 1272 | 16  | GRIN2A | rs4782039  | 9914468       | 27.74         | 0.26                   | 0.584            | T                | 0.99%                  | 0.092                 | 0.12%              | 0.6               | 0.01%          | 0.85          | 0.20%                     | 0.42                     |
| 1273 | 16  | GRIN2A | rs2315510  | 9928092       | 27.74         | 0.09                   | 0.392            | G                | 0.74%                  | 0.131                 | 1.11%              | 0.09              | 0.01%          | 0.85          | 0.26%                     | 0.33                     |
| 1274 | 16  | GRIN2A | rs11074504 | 9941777       | 27.74         | 0.43                   | 0.657            | T                | 0.03%                  | 0.77                  | 0.07%              | 0.7               | 0.28%          | 0.35          | 0.28%                     | 0.33                     |
| 1275 | 16  | GRIN2A | rs10500369 | 9944975       | 27.74         | 0.21                   | 0.383            | G                | 1.64%                  | 0.034                 | 1.11%              | 0.09              | 0.00%          | 0.93          | 0.22%                     | 0.41                     |
| 1276 | 16  | GRIN2A | rs4782090  | 9955433       | 27.74         | 0.11                   | 0.699            | T                | 0.42%                  | 0.24                  | 0.02%              | 0.8               | 0.44%          | 0.21          | 0.23%                     | 0.36                     |
| 1277 | 16  | GRIN2A | rs884918   | 9967327       | 27.74         | 0.45                   | 0.765            | T                | 0.29%                  | 0.35                  | 0.67%              | 0.2               | 0.08%          | 0.62          | 0.01%                     | 0.82                     |
| 1278 | 16  | GRIN2A | rs3104703  | 9972637       | 27.74         | 0.46                   | 0.561            | T                | 1.00%                  | 0.084                 | 1.75%              | 0.02              | 0.06%          | 0.67          | 0.00%                     | 0.9                      |
| 1279 | 16  | GRIN2A | rs11641062 | 9990252       | 27.75         | 0.44                   | 1.000            | C                | 0.05%                  | 0.69                  | 0.00%              | 1                 | 1.46%          | 0.029         | 0.12%                     | 0.51                     |
| 1280 | 16  | GRIN2A | rs2243716  | 9995650       | 27.75         | 0.16                   | 0.177            | A                | 0.13%                  | 0.52                  | 1.06%              | 0.1               | 1.15%          | 0.049         | 0.03%                     | 0.74                     |
| 1281 | 16  | GRIN2A | rs3848328  | 10002888      | 27.77         | 0.31                   | 0.736            | G                | 0.00%                  | 0.96                  | 1.08%              | 0.09              | 0.00%          | 0.93          | 0.00%                     | 0.92                     |
| 1282 | 16  | GRIN2A | rs1237957  | 10004371      | 27.77         | 0.16                   | 0.380            | G                | 0.06%                  | 0.66                  | 0.05%              | 0.7               | 0.67%          | 0.129         | 0.06%                     | 0.66                     |
| 1283 | 16  | GRIN2A | rs844395   | 10010407      | 27.78         | 0.40                   | 1.000            | C                | 0.27%                  | 0.35                  | 0.65%              | 0.2               | 0.04%          | 0.73          | 0.36%                     | 0.24                     |
| 1284 | 16  | GRIN2A | rs1969060  | 10024638      | 27.80         | 0.22                   | 1.000            | T                | 0.21%                  | 0.42                  | 0.46%              | 0.3               | 0.15%          | 0.46          | 0.06%                     | 0.65                     |
| 1285 | 16  | GRIN2A | rs8052800  | 10040290      | 27.83         | 0.47                   | 0.382            | C                | 0.01%                  | 0.85                  | 0.01%              | 0.9               | 0.30%          | 0.33          | 0.09%                     | 0.58                     |
| 1286 | 16  | GRIN2A | rs7197547  | 10043745      | 27.83         | 0.48                   | 0.773            | T                | 0.00%                  | 0.96                  | 0.17%              | 0.5               | 0.19%          | 0.44          | 0.33%                     | 0.3                      |
| 1287 | 16  | GRIN2A | rs9302409  | 10072531      | 27.88         | 0.12                   | 0.487            | T                | 0.36%                  | 0.32                  | 0.11%              | 0.6               | 0.23%          | 0.4           | 0.17%                     | 0.44                     |
| 1288 | 16  | GRIN2A | rs6497676  | 10087724      | 27.90         | 0.38                   | 0.538            | A                | 0.89%                  | 0.119                 | 1.02%              | 0.11              | 0.62%          | 0.17          | 0.23%                     | 0.39                     |

|      | Q                     | R                    | S                  | T                 | U              | V             | W              | X             | Y                 | Z                | AA                    | AB                   | AC                         | AD                        | AE                     | AF                    |
|------|-----------------------|----------------------|--------------------|-------------------|----------------|---------------|----------------|---------------|-------------------|------------------|-----------------------|----------------------|----------------------------|---------------------------|------------------------|-----------------------|
| 1    | H2_Letter-Number Span | P_Letter-Number Span | H2_Verbal learning | P_Verbal learning | H2_Abstraction | P_Abstraction | H2_Face memory | P_Face memory | H2_Spatial memory | P_Spatial memory | H2_Spatial processing | P_Spatial processing | H2_Sensori-motor dexterity | P_Sensori-motor dexterity | H2_Emotion recognition | P_Emotion recognition |
| 1256 | 0.66%                 | 0.13                 | 0.26%              | 0.34              | 0.35%          | 0.3           | 0.19%          | 0.4           | 0.01%             | 0.89             | 0.72%                 | 0.16                 | 0.00%                      | 0.9                       | 0.08%                  | 0.6                   |
| 1257 | 0.03%                 | 0.7                  | 0.25%              | 0.34              | 0.71%          | 0.11          | 0.17%          | 0.4           | 0.00%             | 0.95             | 0.12%                 | 0.54                 | 0.17%                      | 0.4                       | 0.01%                  | 0.9                   |
| 1258 | 0.07%                 | 0.6                  | 0.40%              | 0.23              | 0.19%          | 0.4           | 0.55%          | 0.2           | 0.17%             | 0.44             | 0.08%                 | 0.61                 | 0.03%                      | 0.7                       | 0.29%                  | 0.3                   |
| 1259 | 0.16%                 | 0.4                  | 0.32%              | 0.28              | 0.01%          | 0.8           | 0.01%          | 0.9           | 0.01%             | 0.89             | 0.11%                 | 0.56                 | 0.01%                      | 0.9                       | 0.28%                  | 0.3                   |
| 1260 | 0.28%                 | 0.2                  | 0.27%              | 0.25              | 0.02%          | 0.7           | 0.07%          | 0.6           | 0.10%             | 0.5              | 0.00%                 | 0.93                 | 0.17%                      | 0.4                       | 0.36%                  | 0.2                   |
| 1261 | 0.52%                 | 0.2                  | 0.02%              | 0.78              | 0.04%          | 0.7           | 0.53%          | 0.2           | 0.62%             | 0.131            | 0.03%                 | 0.77                 | 0.34%                      | 0.3                       | 0.00%                  | 1                     |
| 1262 | 0.02%                 | 0.8                  | 0.88%              | 0.076             | 0.13%          | 0.5           | 0.08%          | 0.6           | 0.02%             | 0.79             | 1.12%                 | 0.063                | 0.63%                      | 0.15                      | 0.21%                  | 0.4                   |
| 1263 | 0.10%                 | 0.5                  | 0.25%              | 0.32              | 0.01%          | 0.8           | 0.22%          | 0.4           | 0.14%             | 0.48             | 0.42%                 | 0.24                 | 0.00%                      | 0.9                       | 0.02%                  | 0.8                   |
| 1264 | 0.01%                 | 0.8                  | 0.09%              | 0.57              | 0.00%          | 0.9           | 0.74%          | 0.1           | 0.82%             | 0.097            | 0.01%                 | 0.86                 | 0.40%                      | 0.2                       | 0.16%                  | 0.5                   |
| 1265 | 0.45%                 | 0.2                  | 0.01%              | 0.87              | 0.00%          | 1             | 0.24%          | 0.4           | 0.20%             | 0.42             | 0.11%                 | 0.56                 | 0.11%                      | 0.5                       | 0.08%                  | 0.6                   |
| 1266 | 0.00%                 | 0.9                  | 0.06%              | 0.64              | 0.00%          | 1             | 0.01%          | 0.9           | 0.68%             | 0.137            | 0.14%                 | 0.51                 | 0.01%                      | 0.8                       | 0.21%                  | 0.4                   |
| 1267 | 0.18%                 | 0.4                  | 0.03%              | 0.74              | 0.61%          | 0.2           | 0.10%          | 0.6           | 1.33%             | 0.047            | 1.50%                 | 0.038                | 0.67%                      | 0.14                      | 0.17%                  | 0.5                   |
| 1268 | 0.11%                 | 0.5                  | 0.02%              | 0.82              | 0.42%          | 0.3           | 0.00%          | 1             | 0.97%             | 0.092            | 1.12%                 | 0.078                | 0.03%                      | 0.7                       | 0.00%                  | 0.9                   |
| 1269 | 0.40%                 | 0.3                  | 0.00%              | 0.94              | 0.01%          | 0.9           | 0.12%          | 0.5           | 0.34%             | 0.31             | 0.26%                 | 0.39                 | 0.40%                      | 0.3                       | 0.01%                  | 0.8                   |
| 1270 | 0.29%                 | 0.3                  | 0.08%              | 0.61              | 0.81%          | 0.1           | 0.12%          | 0.5           | 0.67%             | 0.15             | 0.94%                 | 0.095                | 0.01%                      | 0.8                       | 0.03%                  | 0.8                   |
| 1271 | 0.10%                 | 0.6                  | 0.09%              | 0.59              | 0.71%          | 0.13          | 0.00%          | 1             | 0.00%             | 0.96             | 0.74%                 | 0.15                 | 0.20%                      | 0.4                       | 0.00%                  | 0.9                   |
| 1272 | 1.37%                 | 0.02                 | 0.22%              | 0.38              | 0.03%          | 0.8           | 0.22%          | 0.4           | 0.14%             | 0.5              | 1.34%                 | 0.042                | 0.26%                      | 0.3                       | 0.05%                  | 0.7                   |
| 1273 | 0.42%                 | 0.2                  | 0.00%              | 0.92              | 0.14%          | 0.5           | 0.05%          | 0.7           | 0.26%             | 0.32             | 0.00%                 | 0.99                 | 0.07%                      | 0.6                       | 0.42%                  | 0.2                   |
| 1274 | 0.00%                 | 0.9                  | 0.08%              | 0.59              | 0.37%          | 0.2           | 0.10%          | 0.5           | 0.09%             | 0.59             | 0.01%                 | 0.87                 | 0.17%                      | 0.5                       | 1.39%                  | 0.03                  |
| 1275 | 0.09%                 | 0.6                  | 0.18%              | 0.44              | 0.74%          | 0.11          | 0.15%          | 0.5           | 0.41%             | 0.25             | 0.76%                 | 0.128                | 0.10%                      | 0.6                       | 0.10%                  | 0.6                   |
| 1276 | 0.00%                 | 0.9                  | 0.05%              | 0.67              | 0.03%          | 0.7           | 0.01%          | 0.9           | 0.00%             | 0.93             | 0.91%                 | 0.092                | 0.61%                      | 0.2                       | 0.06%                  | 0.6                   |
| 1277 | 0.71%                 | 0.11                 | 0.10%              | 0.55              | 0.87%          | 0.09          | 0.17%          | 0.4           | 0.01%             | 0.88             | 0.25%                 | 0.38                 | 0.02%                      | 0.8                       | 1.22%                  | 0.05                  |
| 1278 | 0.07%                 | 0.6                  | 0.39%              | 0.24              | 0.17%          | 0.4           | 0.16%          | 0.5           | 0.00%             | 0.95             | 0.02%                 | 0.83                 | 0.09%                      | 0.6                       | 0.08%                  | 0.6                   |
| 1279 | 0.10%                 | 0.5                  | 0.00%              | 0.96              | 0.17%          | 0.4           | 0.27%          | 0.3           | 0.12%             | 0.53             | 0.81%                 | 0.104                | 0.04%                      | 0.7                       | 0.64%                  | 0.13                  |
| 1280 | 0.54%                 | 0.2                  | 0.06%              | 0.63              | 0.23%          | 0.4           | 0.04%          | 0.7           | 0.18%             | 0.43             | 0.20%                 | 0.43                 | 0.37%                      | 0.3                       | 0.32%                  | 0.3                   |
| 1281 | 0.51%                 | 0.2                  | 0.08%              | 0.57              | 0.03%          | 0.7           | 0.08%          | 0.6           | 0.68%             | 0.119            | 0.16%                 | 0.47                 | 0.11%                      | 0.5                       | 0.00%                  | 1                     |
| 1282 | 0.14%                 | 0.5                  | 0.36%              | 0.25              | 0.40%          | 0.2           | 0.36%          | 0.2           | 0.93%             | 0.071            | 0.60%                 | 0.17                 | 0.00%                      | 1                         | 0.34%                  | 0.3                   |
| 1283 | 0.07%                 | 0.6                  | 0.00%              | 0.9               | 0.53%          | 0.2           | 0.06%          | 0.6           | 0.07%             | 0.63             | 0.00%                 | 0.96                 | 0.29%                      | 0.3                       | 0.18%                  | 0.4                   |
| 1284 | 0.72%                 | 0.1                  | 0.64%              | 0.119             | 0.04%          | 0.7           | 0.35%          | 0.2           | 1.20%             | 0.039            | 1.20%                 | 0.051                | 0.00%                      | 0.9                       | 0.57%                  | 0.2                   |
| 1285 | 0.44%                 | 0.2                  | 0.30%              | 0.31              | 0.00%          | 0.9           | 0.37%          | 0.3           | 0.36%             | 0.28             | 0.97%                 | 0.086                | 0.03%                      | 0.7                       | 1.39%                  | 0.03                  |
| 1286 | 0.79%                 | 0.1                  | 0.19%              | 0.42              | 0.02%          | 0.8           | 0.18%          | 0.4           | 1.23%             | 0.043            | 0.57%                 | 0.19                 | 0.25%                      | 0.4                       | 0.43%                  | 0.2                   |
| 1287 | 0.09%                 | 0.6                  | 0.10%              | 0.56              | 0.10%          | 0.5           | 0.10%          | 0.5           | 0.53%             | 0.16             | 0.18%                 | 0.43                 | 0.21%                      | 0.4                       | 0.20%                  | 0.4                   |
| 1288 | 0.22%                 | 0.4                  | 0.03%              | 0.74              | 0.03%          | 0.8           | 0.29%          | 0.3           | 0.21%             | 0.41             | 0.06%                 | 0.68                 | 0.29%                      | 0.3                       | 0.48%                  | 0.2                   |

|      | A   | B        | C          | D             | E             | F                      | G                | H                | I                      | J                     | K                  | L                 | M              | N             | O                         | P                        |
|------|-----|----------|------------|---------------|---------------|------------------------|------------------|------------------|------------------------|-----------------------|--------------------|-------------------|----------------|---------------|---------------------------|--------------------------|
| 1    | Chr | Gene     | SNP ID     | Position (bp) | Position (cM) | Minor allele frequency | Hardy-Weinberg P | Reference allele | H2_Prepulse inhibition | P_Prepulse inhibition | H2_P50 suppression | P_P50 suppression | H2_Antisaccade | P_Antisaccade | H2_Continuous performance | P_Continuous performance |
| 1289 | 16  | GRIN2A   | rs1448239  | 10094936      | 27.91         | 0.15                   | 0.263            | C                | 0.05%                  | 0.71                  | 0.00%              | 0.9               | 0.01%          | 0.84          | 0.05%                     | 0.69                     |
| 1290 | 16  | GRIN2A   | rs2352748  | 10106606      | 27.93         | 0.28                   | 1.000            | G                | 0.00%                  | 0.92                  | 0.19%              | 0.5               | 0.00%          | 0.91          | 0.47%                     | 0.23                     |
| 1291 | 16  | GRIN2A   | rs4782262  | 10120001      | 27.95         | 0.11                   | 0.242            | T                | 0.13%                  | 0.53                  | 0.01%              | 0.9               | 0.62%          | 0.17          | 0.17%                     | 0.46                     |
| 1292 | 16  | GRIN2A   | rs1375071  | 10131081      | 27.97         | 0.33                   | 0.408            | T                | 0.04%                  | 0.72                  | 0.33%              | 0.4               | 0.05%          | 0.69          | 0.01%                     | 0.87                     |
| 1293 | 16  | GRIN2A   | rs1070487  | 10143493      | 27.99         | 0.37                   | 0.533            | G                | 0.30%                  | 0.32                  | 0.01%              | 0.9               | 0.02%          | 0.8           | 0.03%                     | 0.74                     |
| 1294 | 16  | GRIN2A   | rs1345424  | 10158160      | 28.01         | 0.28                   | 1.000            | T                | 0.93%                  | 0.105                 | 0.85%              | 0.2               | 0.45%          | 0.25          | 0.22%                     | 0.4                      |
| 1295 | 16  | GRIN2A   | rs4587976  | 10163636      | 28.02         | 0.39                   | 0.363            | G                | 0.03%                  | 0.78                  | 0.10%              | 0.6               | 0.03%          | 0.75          | 0.01%                     | 0.9                      |
| 1296 | 16  | GRIN2A   | rs1650420  | 10175831      | 28.04         | 0.38                   | 0.020            | G                | 0.04%                  | 0.73                  | 0.08%              | 0.6               | 0.09%          | 0.57          | 0.00%                     | 0.97                     |
| 1297 | 16  | GRIN2A   | rs1868291  | 10176699      | 28.04         | 0.09                   | 0.370            | A                | 0.02%                  | 0.81                  | 0.09%              | 0.6               | 0.03%          | 0.78          | 0.00%                     | 1                        |
| 1298 | 16  | GRIN2A   | rs1071504  | 10187517      | 28.08         | 0.31                   | 0.612            | T                | 0.07%                  | 0.64                  | 0.06%              | 0.7               | 0.01%          | 0.89          | 0.15%                     | 0.47                     |
| 1299 | 16  | NDE1     | rs4781678  | 15654613      | 39.22         | 0.43                   | 0.554            | A                | 0.44%                  | 0.25                  | 0.17%              | 0.5               | 0.00%          | 0.97          | 0.01%                     | 0.88                     |
| 1300 | 16  | NDE1     | rs2242549  | 15705711      | 39.24         | 0.42                   | 1.000            | A                | 0.72%                  | 0.15                  | 0.56%              | 0.2               | 0.13%          | 0.52          | 0.64%                     | 0.14                     |
| 1301 | 16  | NDE1     | rs881803   | 15709835      | 39.24         | 0.35                   | 0.872            | A                | 0.45%                  | 0.25                  | 0.66%              | 0.2               | 0.20%          | 0.42          | 0.53%                     | 0.18                     |
| 1302 | 16  | NDE1     | rs2075511  | 15725642      | 39.24         | 0.49                   | 1.000            | T                | 1.16%                  | 0.06                  | 0.45%              | 0.3               | 0.00%          | 0.99          | 0.74%                     | 0.115                    |
| 1303 | 17  | YWHAE    | rs8078073  | 1215433       | 2.20          | 0.23                   | 0.094            | T                | 0.01%                  | 0.86                  | 0.00%              | 1                 | 0.06%          | 0.65          | 0.57%                     | 0.17                     |
| 1304 | 17  | YWHAE    | rs10521111 | 1228614       | 2.20          | 0.11                   | 0.241            | T                | 1.30%                  | 0.052                 | 0.02%              | 0.8               | 0.02%          | 0.81          | 0.00%                     | 0.98                     |
| 1305 | 17  | YWHAE    | rs4790084  | 1229729       | 2.20          | 0.37                   | 0.753            | A                | 0.00%                  | 0.94                  | 0.02%              | 0.8               | 0.36%          | 0.26          | 0.07%                     | 0.61                     |
| 1306 | 17  | YWHAE    | rs9912147  | 1231072       | 2.20          | 0.48                   | 0.382            | C                | 0.89%                  | 0.09                  | 0.26%              | 0.4               | 0.63%          | 0.137         | 0.13%                     | 0.49                     |
| 1307 | 17  | PAFAH1B1 | rs8068673  | 2449136       | 6.16          | 0.31                   | 0.387            | T                | 0.23%                  | 0.41                  | 1.65%              | 0.04              | 0.02%          | 0.79          | 0.04%                     | 0.72                     |
| 1308 | 17  | PAFAH1B1 | rs1266475  | 2482070       | 6.17          | 0.36                   | 0.745            | T                | 0.13%                  | 0.54                  | 1.06%              | 0.1               | 0.01%          | 0.86          | 0.22%                     | 0.39                     |
| 1309 | 17  | PAFAH1B1 | rs8081803  | 2511759       | 6.21          | 0.23                   | 0.666            | T                | 0.62%                  | 0.17                  | 0.20%              | 0.5               | 0.09%          | 0.59          | 0.07%                     | 0.64                     |
| 1310 | 17  | PAFAH1B1 | rs2317297  | 2523841       | 6.26          | 0.11                   | 0.439            | T                | 0.21%                  | 0.41                  | 1.20%              | 0.06              | 0.05%          | 0.68          | 0.00%                     | 0.89                     |
| 1311 | 17  | DLG4     | rs11650232 | 7029647       | 17.77         | 0.44                   | 0.464            | A                | 0.08%                  | 0.64                  | 0.02%              | 0.8               | 0.18%          | 0.44          | 0.00%                     | 0.93                     |
| 1312 | 17  | DLG4     | rs314253   | 7032374       | 17.77         | 0.35                   | 1.000            | A                | 0.29%                  | 0.39                  | 0.10%              | 0.6               | 1.21%          | 0.07          | 0.41%                     | 0.27                     |
| 1313 | 17  | DLG4     | rs222853   | 7054704       | 17.77         | 0.05                   | 0.097            | C                | 0.02%                  | 0.8                   | 0.03%              | 0.8               | 0.34%          | 0.29          | 1.26%                     | 0.034                    |
| 1314 | 17  | DLG4     | rs507506   | 7059046       | 17.77         | 0.42                   | 0.370            | G                | 0.70%                  | 0.15                  | 0.29%              | 0.4               | 0.66%          | 0.149         | 0.19%                     | 0.42                     |
| 1315 | 17  | NDEL1    | rs1391768  | 8281591       | 20.02         | 0.41                   | 0.657            | T                | 0.03%                  | 0.79                  | 0.02%              | 0.8               | 0.31%          | 0.34          | 0.16%                     | 0.49                     |
| 1316 | 17  | SLC6A4   | rs2054847  | 25556139      | 56.10         | 0.41                   | 0.369            | C                | 0.91%                  | 0.093                 | 0.12%              | 0.6               | 0.00%          | 0.94          | 0.13%                     | 0.49                     |
| 1317 | 17  | SLC6A4   | rs140700   | 25567515      | 56.11         | 0.09                   | 0.624            | G                | 0.03%                  | 0.77                  | 0.11%              | 0.6               | 0.04%          | 0.74          | 0.01%                     | 0.86                     |
| 1318 | 17  | SLC6A4   | rs6355     | 25572936      | 56.11         | 0.01                   | 1.000            | G                | 0.12%                  | 0.51                  | 0.26%              | 0.4               | 0.68%          | 0.123         | 0.02%                     | 0.78                     |
| 1319 | 17  | SLC6A4   | rs2020933  | 25585881      | 56.12         | 0.07                   | 0.065            | T                | 0.03%                  | 0.78                  | 0.15%              | 0.5               | 0.00%          | 0.96          | 0.58%                     | 0.18                     |
| 1320 | 17  | SLC6A4   | rs4392119  | 25589489      | 56.12         | 0.03                   | 1.000            | C                | 0.03%                  | 0.79                  | 1.10%              | 0.14              | 1.34%          | 0.055         | 0.29%                     | 0.34                     |
| 1321 | 17  | PPP1R1B  | rs4795390  | 35035136      | 69.80         | 0.18                   | 0.046            | C                | 0.26%                  | 0.37                  | 0.37%              | 0.3               | 0.07%          | 0.64          | 0.08%                     | 0.6                      |

|      | Q                     | R                    | S                  | T                 | U              | V             | W              | X             | Y                 | Z                | AA                    | AB                   | AC                         | AD                        | AE                     | AF                    |
|------|-----------------------|----------------------|--------------------|-------------------|----------------|---------------|----------------|---------------|-------------------|------------------|-----------------------|----------------------|----------------------------|---------------------------|------------------------|-----------------------|
| 1    | H2_Letter-Number Span | P_Letter-Number Span | H2_Verbal learning | P_Verbal learning | H2_Abstraction | P_Abstraction | H2_Face memory | P_Face memory | H2_Spatial memory | P_Spatial memory | H2_Spatial processing | P_Spatial processing | H2_Sensori-motor dexterity | P_Sensori-motor dexterity | H2_Emotion recognition | P_Emotion recognition |
| 1289 | 0.00%                 | 1                    | 0.32%              | 0.3               | 0.06%          | 0.7           | 0.77%          | 0.11          | 0.02%             | 0.82             | 1.17%                 | 0.06                 | 0.17%                      | 0.5                       | 2.31%                  | 0.006                 |
| 1290 | 0.20%                 | 0.4                  | 0.00%              | 0.91              | 0.61%          | 0.2           | 0.04%          | 0.7           | 0.20%             | 0.43             | 0.61%                 | 0.18                 | 0.89%                      | 0.09                      | 0.50%                  | 0.2                   |
| 1291 | 0.00%                 | 1                    | 0.41%              | 0.24              | 0.06%          | 0.6           | 0.53%          | 0.2           | 0.08%             | 0.6              | 1.72%                 | 0.021                | 0.07%                      | 0.6                       | 2.92%                  | 0.002                 |
| 1292 | 0.06%                 | 0.6                  | 0.00%              | 1                 | 0.24%          | 0.4           | 0.04%          | 0.7           | 0.00%             | 0.95             | 0.00%                 | 0.99                 | 0.42%                      | 0.2                       | 0.19%                  | 0.4                   |
| 1293 | 0.17%                 | 0.4                  | 0.05%              | 0.64              | 0.30%          | 0.3           | 0.00%          | 1             | 0.06%             | 0.64             | 0.33%                 | 0.3                  | 0.15%                      | 0.5                       | 0.37%                  | 0.2                   |
| 1294 | 1.50%                 | 0.02                 | 0.39%              | 0.25              | 0.77%          | 0.1           | 0.00%          | 0.9           | 0.58%             | 0.17             | 0.07%                 | 0.64                 | 1.12%                      | 0.06                      | 0.10%                  | 0.6                   |
| 1295 | 0.21%                 | 0.4                  | 0.30%              | 0.3               | 0.37%          | 0.3           | 0.00%          | 1             | 0.19%             | 0.44             | 0.24%                 | 0.4                  | 0.78%                      | 0.11                      | 0.24%                  | 0.4                   |
| 1296 | 0.20%                 | 0.4                  | 0.00%              | 0.91              | 0.10%          | 0.6           | 0.13%          | 0.5           | 0.71%             | 0.112            | 0.26%                 | 0.35                 | 0.13%                      | 0.5                       | 0.01%                  | 0.9                   |
| 1297 | 0.62%                 | 0.2                  | 0.05%              | 0.7               | 0.71%          | 0.14          | 0.00%          | 0.9           | 0.91%             | 0.109            | 0.00%                 | 0.98                 | 0.60%                      | 0.2                       | 0.42%                  | 0.3                   |
| 1298 | 0.01%                 | 0.9                  | 0.00%              | 0.89              | 0.70%          | 0.12          | 0.08%          | 0.6           | 0.37%             | 0.27             | 0.07%                 | 0.64                 | 0.81%                      | 0.1                       | 0.02%                  | 0.8                   |
| 1299 | 0.00%                 | 0.9                  | 0.22%              | 0.37              | 0.00%          | 1             | 0.00%          | 0.9           | 0.03%             | 0.76             | 0.15%                 | 0.49                 | 0.01%                      | 0.8                       | 0.02%                  | 0.8                   |
| 1300 | 0.15%                 | 0.5                  | 0.84%              | 0.077             | 0.01%          | 0.9           | 0.33%          | 0.3           | 0.08%             | 0.6              | 1.69%                 | 0.023                | 0.06%                      | 0.7                       | 0.00%                  | 1                     |
| 1301 | 0.05%                 | 0.7                  | 0.65%              | 0.123             | 0.60%          | 0.2           | 0.01%          | 0.8           | 0.12%             | 0.54             | 0.95%                 | 0.088                | 0.59%                      | 0.2                       | 0.19%                  | 0.4                   |
| 1302 | 0.19%                 | 0.4                  | 0.21%              | 0.38              | 0.00%          | 0.9           | 0.14%          | 0.5           | 0.00%             | 0.95             | 1.32%                 | 0.047                | 0.25%                      | 0.4                       | 0.01%                  | 0.8                   |
| 1303 | 0.62%                 | 0.13                 | 0.63%              | 0.127             | 0.22%          | 0.4           | 0.37%          | 0.2           | 0.31%             | 0.3              | 0.20%                 | 0.43                 | 0.05%                      | 0.7                       | 0.00%                  | 0.9                   |
| 1304 | 0.21%                 | 0.4                  | 0.07%              | 0.61              | 0.04%          | 0.7           | 0.17%          | 0.4           | 0.31%             | 0.31             | 0.10%                 | 0.58                 | 0.70%                      | 0.11                      | 0.55%                  | 0.2                   |
| 1305 | 0.06%                 | 0.6                  | 0.16%              | 0.43              | 0.00%          | 0.9           | 0.33%          | 0.3           | 0.23%             | 0.36             | 0.02%                 | 0.77                 | 0.19%                      | 0.4                       | 0.96%                  | 0.07                  |
| 1306 | 0.13%                 | 0.5                  | 0.03%              | 0.73              | 0.01%          | 0.9           | 0.02%          | 0.8           | 0.00%             | 0.97             | 0.00%                 | 1                    | 0.56%                      | 0.2                       | 2.92%                  | 0.0012                |
| 1307 | 0.29%                 | 0.3                  | 0.04%              | 0.7               | 0.15%          | 0.5           | 0.08%          | 0.6           | 0.01%             | 0.86             | 0.13%                 | 0.52                 | 0.36%                      | 0.3                       | 0.26%                  | 0.4                   |
| 1308 | 0.18%                 | 0.4                  | 0.02%              | 0.78              | 0.19%          | 0.4           | 0.11%          | 0.5           | 0.03%             | 0.77             | 0.19%                 | 0.45                 | 0.00%                      | 0.9                       | 0.30%                  | 0.3                   |
| 1309 | 0.08%                 | 0.6                  | 0.03%              | 0.74              | 0.09%          | 0.6           | 0.07%          | 0.6           | 0.01%             | 0.85             | 0.07%                 | 0.64                 | 0.41%                      | 0.2                       | 0.20%                  | 0.4                   |
| 1310 | 0.02%                 | 0.8                  | 0.01%              | 0.81              | 0.68%          | 0.1           | 0.01%          | 0.9           | 0.13%             | 0.49             | 0.13%                 | 0.5                  | 0.28%                      | 0.3                       | 0.08%                  | 0.6                   |
| 1311 | 1.89%                 | 0.007                | 0.06%              | 0.64              | 0.05%          | 0.7           | 0.37%          | 0.3           | 1.56%             | 0.022            | 0.00%                 | 0.97                 | 0.58%                      | 0.2                       | 0.11%                  | 0.6                   |
| 1312 | 0.01%                 | 0.9                  | 0.01%              | 0.85              | 0.65%          | 0.14          | 1.40%          | 0.03          | 1.65%             | 0.032            | 0.27%                 | 0.4                  | 0.01%                      | 0.8                       | 0.07%                  | 0.6                   |
| 1313 | 0.26%                 | 0.4                  | 0.42%              | 0.2               | 0.12%          | 0.5           | 0.05%          | 0.7           | 0.19%             | 0.43             | 2.29%                 | 0.0093               | 0.47%                      | 0.2                       | 1.12%                  | 0.05                  |
| 1314 | 0.82%                 | 0.09                 | 0.17%              | 0.43              | 0.31%          | 0.3           | 0.04%          | 0.7           | 0.10%             | 0.56             | 0.10%                 | 0.58                 | 1.15%                      | 0.06                      | 0.62%                  | 0.15                  |
| 1315 | 0.46%                 | 0.2                  | 0.32%              | 0.31              | 0.08%          | 0.6           | 0.31%          | 0.3           | 0.11%             | 0.56             | 0.01%                 | 0.87                 | 0.10%                      | 0.6                       | 0.29%                  | 0.3                   |
| 1316 | 0.00%                 | 1                    | 0.12%              | 0.5               | 0.14%          | 0.5           | 0.60%          | 0.14          | 0.00%             | 0.9              | 0.02%                 | 0.81                 | 0.01%                      | 0.8                       | 0.20%                  | 0.4                   |
| 1317 | 1.43%                 | 0.02                 | 0.08%              | 0.59              | 0.09%          | 0.6           | 0.01%          | 0.9           | 0.10%             | 0.57             | 0.00%                 | 0.99                 | 0.49%                      | 0.2                       | 0.16%                  | 0.5                   |
| 1318 | 0.24%                 | 0.3                  | 0.12%              | 0.47              | 0.00%          | 1             | 0.07%          | 0.6           | 0.02%             | 0.81             | 0.56%                 | 0.21                 | 0.08%                      | 0.6                       | 0.00%                  | 1                     |
| 1319 | 0.48%                 | 0.2                  | 0.28%              | 0.33              | 0.00%          | 1             | 0.09%          | 0.6           | 0.05%             | 0.67             | 0.03%                 | 0.78                 | 0.23%                      | 0.4                       | 0.02%                  | 0.8                   |
| 1320 | 0.08%                 | 0.6                  | 0.17%              | 0.46              | 0.03%          | 0.8           | 0.00%          | 0.9           | 0.20%             | 0.45             | 0.00%                 | 0.97                 | 0.03%                      | 0.8                       | 0.34%                  | 0.3                   |
| 1321 | 0.00%                 | 0.9                  | 0.00%              | 0.9               | 0.80%          | 0.09          | 0.02%          | 0.8           | 0.12%             | 0.53             | 0.30%                 | 0.34                 | 0.49%                      | 0.2                       | 0.53%                  | 0.2                   |



|      | A   | B       | C          | D             | E             | F                      | G                | H                | I                      | J                     | K                  | L                 | M              | N             | O                         | P                        |
|------|-----|---------|------------|---------------|---------------|------------------------|------------------|------------------|------------------------|-----------------------|--------------------|-------------------|----------------|---------------|---------------------------|--------------------------|
| 1    | Chr | Gene    | SNP ID     | Position (bp) | Position (cM) | Minor allele frequency | Hardy-Weinberg P | Reference allele | H2_Prepulse inhibition | P_Prepulse inhibition | H2_P50 suppression | P_P50 suppression | H2_Antisaccade | P_Antisaccade | H2_Continuous performance | P_Continuous performance |
| 1322 | 17  | PPP1R1B | rs879606   | 35035375      | 69.80         | 0.19                   | 0.006            | G                | 0.23%                  | 0.39                  | 0.43%              | 0.3               | 0.00%          | 0.95          | 0.24%                     | 0.37                     |
| 1323 | 17  | PPP1R1B | rs3764352  | 35044465      | 69.80         | 0.29                   | 0.106            | A                | 0.00%                  | 0.95                  | 0.02%              | 0.8               | 0.00%          | 0.97          | 1.52%                     | 0.027                    |
| 1324 | 17  | CRHR1   | rs4792882  | 41225048      | 87.01         | 0.01                   | 1.000            | T                | 0.26%                  | 0.31                  | 0.05%              | 0.7               | 0.39%          | 0.25          | 0.01%                     | 0.87                     |
| 1325 | 17  | CRHR1   | rs4792887  | 41232791      | 87.01         | 0.09                   | 1.000            | C                | 0.12%                  | 0.56                  | 0.48%              | 0.2               | 2.75%          | 0.0038        | 0.48%                     | 0.22                     |
| 1326 | 17  | CRHR1   | rs81189    | 41250579      | 87.01         | 0.48                   | 0.062            | G                | 0.29%                  | 0.33                  | 0.24%              | 0.4               | 1.58%          | 0.018         | 1.57%                     | 0.017                    |
| 1327 | 17  | CRHR1   | rs242939   | 41251360      | 87.01         | 0.06                   | 0.537            | A                | 0.23%                  | 0.38                  | 0.00%              | 0.9               | 2.80%          | 0.00147       | 0.57%                     | 0.141                    |
| 1328 | 19  | MAG     | rs11669734 | 40486615      | 71.53         | 0.25                   | 0.127            | C                | 0.02%                  | 0.82                  | 0.22%              | 0.5               | 0.44%          | 0.24          | 1.77%                     | 0.018                    |
| 1329 | 19  | APOE    | rs405509   | 50100676      | 81.02         | 0.49                   | 0.061            | C                | 0.25%                  | 0.39                  | 0.08%              | 0.6               | 0.13%          | 0.53          | 0.03%                     | 0.77                     |
| 1330 | 20  | SLC32A1 | rs6092935  | 36783319      | 59.33         | 0.19                   | 0.351            | T                | 0.02%                  | 0.82                  | 0.73%              | 0.14              | 0.18%          | 0.43          | 0.08%                     | 0.6                      |
| 1331 | 20  | SLC32A1 | rs1322183  | 36791688      | 59.33         | 0.46                   | 0.380            | A                | 0.06%                  | 0.66                  | 0.25%              | 0.4               | 0.40%          | 0.23          | 0.40%                     | 0.23                     |
| 1332 | 20  | SLC32A1 | rs1321099  | 36792059      | 59.33         | 0.15                   | 0.120            | G                | 0.01%                  | 0.9                   | 1.20%              | 0.07              | 0.01%          | 0.83          | 0.01%                     | 0.85                     |
| 1333 | 20  | SLC32A1 | rs1406857  | 36795846      | 59.33         | 0.34                   | 1.000            | C                | 0.69%                  | 0.138                 | 0.49%              | 0.3               | 0.03%          | 0.73          | 0.08%                     | 0.59                     |
| 1334 | 20  | CHRNA4  | rs755204   | 61464609      | 108.26        | 0.09                   | 1.000            | C                | 0.35%                  | 0.35                  | 0.11%              | 0.6               | 1.55%          | 0.034         | 0.67%                     | 0.147                    |
| 1335 | 20  | CHRNA4  | rs755203   | 61464708      | 108.26        | 0.48                   | 0.029            | C                | 0.52%                  | 0.2                   | 0.09%              | 0.6               | 1.11%          | 0.054         | 0.03%                     | 0.76                     |
| 1336 | 22  | PRODH   | rs385440   | 17281090      | 12.36         | 0.05                   | 0.084            | G                | 0.53%                  | 0.18                  | 0.02%              | 0.8               | 0.02%          | 0.77          | 0.01%                     | 0.86                     |
| 1337 | 22  | PRODH   | rs9618419  | 17287405      | 12.41         | 0.14                   | 0.756            | G                | 0.01%                  | 0.89                  | 1.34%              | 0.06              | 0.10%          | 0.56          | 0.65%                     | 0.122                    |
| 1338 | 22  | PRODH   | rs5746640  | 17291157      | 12.44         | 0.41                   | 0.645            | G                | 0.01%                  | 0.89                  | 0.06%              | 0.7               | 0.52%          | 0.2           | 0.01%                     | 0.86                     |
| 1339 | 22  | PRODH   | rs2241305  | 17292429      | 12.45         | 0.12                   | 1.000            | T                | 1.06%                  | 0.099                 | 1.03%              | 0.12              | 1.60%          | 0.028         | 0.08%                     | 0.62                     |
| 1340 | 22  | PRODH   | rs2016108  | 17295963      | 12.48         | 0.30                   | 0.858            | C                | 0.97%                  | 0.088                 | 0.41%              | 0.3               | 0.17%          | 0.47          | 0.39%                     | 0.25                     |
| 1341 | 22  | PRODH   | rs367766   | 17297031      | 12.49         | 0.34                   | 0.748            | T                | 0.32%                  | 0.34                  | 0.03%              | 0.8               | 2.09%          | 0.0096        | 0.01%                     | 0.84                     |
| 1342 | 22  | PRODH   | rs759406   | 17297748      | 12.49         | 0.13                   | 0.744            | G                | 0.07%                  | 0.63                  | 1.53%              | 0.05              | 0.10%          | 0.55          | 0.03%                     | 0.74                     |
| 1343 | 22  | PRODH   | rs4819757  | 17300516      | 12.51         | 0.39                   | 0.879            | T                | 1.18%                  | 0.071                 | 0.09%              | 0.7               | 0.75%          | 0.138         | 0.00%                     | 0.96                     |
| 1344 | 22  | PRODH   | rs9604911  | 17304956      | 12.55         | 0.28                   | 0.583            | G                | 0.26%                  | 0.37                  | 0.15%              | 0.5               | 1.34%          | 0.037         | 1.10%                     | 0.052                    |
| 1345 | 22  | DGCR2   | rs2238754  | 17438146      | 13.05         | 0.08                   | 0.348            | C                | 0.20%                  | 0.44                  | 0.11%              | 0.6               | 1.20%          | 0.058         | 0.53%                     | 0.19                     |
| 1346 | 22  | DGCR2   | rs2854659  | 17463552      | 13.07         | 0.19                   | 1.000            | A                | 0.93%                  | 0.098                 | 1.09%              | 0.11              | 0.02%          | 0.82          | 0.04%                     | 0.73                     |
| 1347 | 22  | DGCR2   | rs10483100 | 17465202      | 13.07         | 0.18                   | 1.000            | T                | 0.08%                  | 0.63                  | 1.06%              | 0.13              | 0.66%          | 0.17          | 0.01%                     | 0.83                     |
| 1348 | 22  | DGCR2   | rs2800972  | 17473085      | 13.07         | 0.42                   | 0.371            | A                | 0.45%                  | 0.24                  | 0.00%              | 0.9               | 0.24%          | 0.39          | 0.42%                     | 0.24                     |
| 1349 | 22  | DGCR2   | rs807743   | 17483598      | 13.08         | 0.25                   | 1.000            | C                | 0.55%                  | 0.2                   | 0.09%              | 0.6               | 1.14%          | 0.064         | 0.04%                     | 0.73                     |
| 1350 | 22  | DGCR2   | rs807759   | 17493686      | 13.09         | 0.42                   | 0.231            | T                | 0.62%                  | 0.17                  | 0.15%              | 0.5               | 0.21%          | 0.42          | 0.57%                     | 0.17                     |
| 1351 | 22  | COMT    | rs737865   | 18310121      | 13.65         | 0.25                   | 1.000            | T                | 0.09%                  | 0.6                   | 0.01%              | 0.9               | 0.61%          | 0.17          | 0.03%                     | 0.75                     |
| 1352 | 22  | COMT    | rs5993883  | 18317638      | 13.65         | 0.49                   | 0.311            | T                | 0.10%                  | 0.59                  | 0.01%              | 0.9               | 1.19%          | 0.048         | 0.00%                     | 0.95                     |
| 1353 | 22  | COMT    | rs740603   | 18325177      | 13.66         | 0.47                   | 0.769            | A                | 0.33%                  | 0.33                  | 0.08%              | 0.7               | 0.62%          | 0.16          | 0.01%                     | 0.88                     |
| 1354 | 22  | COMT    | rs740601   | 18330763      | 13.66         | 0.44                   | 0.764            | A                | 0.49%                  | 0.23                  | 0.01%              | 0.9               | 1.80%          | 0.016         | 0.00%                     | 0.92                     |

|      | Q                     | R                    | S                  | T                 | U              | V             | W              | X             | Y                 | Z                | AA                    | AB                   | AC                         | AD                        | AE                     | AF                    |
|------|-----------------------|----------------------|--------------------|-------------------|----------------|---------------|----------------|---------------|-------------------|------------------|-----------------------|----------------------|----------------------------|---------------------------|------------------------|-----------------------|
| 1    | H2_Letter-Number Span | P_Letter-Number Span | H2_Verbal learning | P_Verbal learning | H2_Abstraction | P_Abstraction | H2_Face memory | P_Face memory | H2_Spatial memory | P_Spatial memory | H2_Spatial processing | P_Spatial processing | H2_Sensori-motor dexterity | P_Sensori-motor dexterity | H2_Emotion recognition | P_Emotion recognition |
| 1322 | 0.00%                 | 0.9                  | 0.01%              | 0.88              | 1.12%          | 0.05          | 0.00%          | 1             | 0.21%             | 0.41             | 0.30%                 | 0.34                 | 0.34%                      | 0.3                       | 0.55%                  | 0.2                   |
| 1323 | 0.13%                 | 0.5                  | 0.19%              | 0.42              | 0.28%          | 0.3           | 0.69%          | 0.12          | 0.23%             | 0.39             | 1.05%                 | 0.079                | 0.02%                      | 0.8                       | 1.27%                  | 0.04                  |
| 1324 | 0.17%                 | 0.4                  | 0.64%              | 0.089             | 0.01%          | 0.9           | 0.29%          | 0.3           | 1.10%             | 0.038            | 0.00%                 | 0.95                 | 0.16%                      | 0.4                       | 0.42%                  | 0.2                   |
| 1325 | 0.52%                 | 0.2                  | 0.00%              | 0.99              | 0.01%          | 0.9           | 0.02%          | 0.8           | 0.14%             | 0.51             | 0.14%                 | 0.53                 | 0.63%                      | 0.12                      | 0.03%                  | 0.7                   |
| 1326 | 1.16%                 | 0.02                 | 0.65%              | 0.114             | 0.08%          | 0.6           | 0.04%          | 0.7           | 0.84%             | 0.081            | 0.19%                 | 0.42                 | 0.26%                      | 0.3                       | 0.09%                  | 0.6                   |
| 1327 | 0.21%                 | 0.4                  | 0.20%              | 0.36              | 1.43%          | 0.014         | 0.07%          | 0.6           | 0.11%             | 0.52             | 0.20%                 | 0.4                  | 0.47%                      | 0.2                       | 0.03%                  | 0.8                   |
| 1328 | 1.58%                 | 0.02                 | 1.02%              | 0.062             | 0.40%          | 0.3           | 1.78%          | 0.02          | 0.33%             | 0.31             | 1.17%                 | 0.066                | 0.00%                      | 1                         | 0.78%                  | 0.12                  |
| 1329 | 0.21%                 | 0.4                  | 0.18%              | 0.43              | 0.02%          | 0.8           | 0.86%          | 0.09          | 0.54%             | 0.19             | 0.00%                 | 0.98                 | 0.25%                      | 0.4                       | 0.05%                  | 0.7                   |
| 1330 | 0.03%                 | 0.7                  | 0.19%              | 0.4               | 0.46%          | 0.2           | 0.63%          | 0.12          | 0.13%             | 0.5              | 0.24%                 | 0.39                 | 0.01%                      | 0.9                       | 0.07%                  | 0.6                   |
| 1331 | 0.00%                 | 1                    | 0.74%              | 0.087             | 2.18%          | 0.005         | 0.38%          | 0.2           | 0.00%             | 0.89             | 0.08%                 | 0.61                 | 0.07%                      | 0.6                       | 0.10%                  | 0.5                   |
| 1332 | 0.55%                 | 0.14                 | 1.68%              | 0.0118            | 0.09%          | 0.6           | 0.09%          | 0.6           | 0.00%             | 0.93             | 0.16%                 | 0.48                 | 0.68%                      | 0.12                      | 0.44%                  | 0.2                   |
| 1333 | 0.85%                 | 0.07                 | 0.00%              | 0.89              | 0.29%          | 0.3           | 0.08%          | 0.6           | 0.00%             | 0.91             | 0.00%                 | 0.97                 | 0.31%                      | 0.3                       | 0.00%                  | 1                     |
| 1334 | 0.00%                 | 1                    | 0.07%              | 0.65              | 0.66%          | 0.2           | 0.30%          | 0.3           | 0.08%             | 0.62             | 1.13%                 | 0.084                | 0.42%                      | 0.3                       | 0.49%                  | 0.2                   |
| 1335 | 0.00%                 | 0.9                  | 0.14%              | 0.47              | 0.50%          | 0.2           | 0.34%          | 0.3           | 0.00%             | 0.9              | 2.16%                 | 0.0093               | 4.50%                      | 0.00009                   | 0.35%                  | 0.3                   |
| 1336 | 0.08%                 | 0.6                  | 0.10%              | 0.5               | 0.06%          | 0.6           | 0.28%          | 0.3           | 0.30%             | 0.28             | 0.12%                 | 0.5                  | 0.04%                      | 0.7                       | 0.32%                  | 0.3                   |
| 1337 | 0.14%                 | 0.5                  | 0.07%              | 0.59              | 0.27%          | 0.3           | 0.27%          | 0.3           | 0.11%             | 0.53             | 0.15%                 | 0.48                 | 0.02%                      | 0.8                       | 0.01%                  | 0.8                   |
| 1338 | 0.25%                 | 0.3                  | 0.01%              | 0.83              | 0.03%          | 0.7           | 1.07%          | 0.05          | 0.77%             | 0.113            | 0.16%                 | 0.48                 | 0.25%                      | 0.4                       | 0.35%                  | 0.3                   |
| 1339 | 0.16%                 | 0.5                  | 0.43%              | 0.23              | 0.04%          | 0.7           | 0.03%          | 0.8           | 0.40%             | 0.27             | 0.06%                 | 0.67                 | 0.02%                      | 0.8                       | 0.03%                  | 0.8                   |
| 1340 | 0.43%                 | 0.2                  | 0.36%              | 0.25              | 0.24%          | 0.4           | 1.34%          | 0.03          | 0.08%             | 0.62             | 0.37%                 | 0.28                 | 0.02%                      | 0.8                       | 0.26%                  | 0.4                   |
| 1341 | 0.09%                 | 0.6                  | 0.04%              | 0.7               | 0.23%          | 0.4           | 0.54%          | 0.2           | 0.01%             | 0.87             | 0.12%                 | 0.54                 | 0.26%                      | 0.3                       | 0.40%                  | 0.2                   |
| 1342 | 0.01%                 | 0.8                  | 0.00%              | 0.99              | 0.04%          | 0.7           | 0.06%          | 0.6           | 0.28%             | 0.32             | 0.22%                 | 0.39                 | 0.49%                      | 0.2                       | 0.43%                  | 0.2                   |
| 1343 | 0.02%                 | 0.8                  | 0.00%              | 0.97              | 0.04%          | 0.7           | 0.36%          | 0.3           | 0.08%             | 0.61             | 0.10%                 | 0.59                 | 0.08%                      | 0.6                       | 0.23%                  | 0.4                   |
| 1344 | 0.25%                 | 0.3                  | 1.15%              | 0.038             | 0.06%          | 0.6           | 1.73%          | 0.012         | 0.04%             | 0.72             | 1.41%                 | 0.034                | 0.01%                      | 0.9                       | 0.61%                  | 0.15                  |
| 1345 | 0.24%                 | 0.4                  | 0.03%              | 0.74              | 0.26%          | 0.3           | 0.22%          | 0.4           | 0.26%             | 0.35             | 0.16%                 | 0.48                 | 0.02%                      | 0.8                       | 0.38%                  | 0.2                   |
| 1346 | 1.56%                 | 0.02                 | 0.38%              | 0.25              | 0.25%          | 0.4           | 0.00%          | 1             | 0.23%             | 0.41             | 0.06%                 | 0.67                 | 0.13%                      | 0.5                       | 0.00%                  | 0.9                   |
| 1347 | 0.38%                 | 0.3                  | 0.66%              | 0.142             | 0.08%          | 0.6           | 0.03%          | 0.7           | 0.02%             | 0.81             | 0.14%                 | 0.54                 | 0.05%                      | 0.7                       | 0.07%                  | 0.6                   |
| 1348 | 1.27%                 | 0.03                 | 1.44%              | 0.024             | 0.16%          | 0.5           | 0.06%          | 0.7           | 0.31%             | 0.33             | 0.15%                 | 0.51                 | 0.19%                      | 0.4                       | 0.00%                  | 1                     |
| 1349 | 1.24%                 | 0.04                 | 0.70%              | 0.118             | 0.00%          | 1             | 0.03%          | 0.7           | 0.03%             | 0.76             | 0.00%                 | 0.94                 | 0.07%                      | 0.6                       | 0.08%                  | 0.6                   |
| 1350 | 1.43%                 | 0.02                 | 1.46%              | 0.023             | 0.24%          | 0.4           | 0.12%          | 0.5           | 0.25%             | 0.38             | 0.50%                 | 0.23                 | 0.07%                      | 0.6                       | 0.06%                  | 0.7                   |
| 1351 | 1.30%                 | 0.03                 | 0.10%              | 0.56              | 0.07%          | 0.6           | 0.06%          | 0.6           | 0.95%             | 0.081            | 0.17%                 | 0.48                 | 0.40%                      | 0.3                       | 0.04%                  | 0.7                   |
| 1352 | 0.77%                 | 0.09                 | 0.09%              | 0.56              | 0.00%          | 0.9           | 0.00%          | 0.9           | 0.55%             | 0.18             | 0.00%                 | 0.92                 | 0.11%                      | 0.5                       | 0.01%                  | 0.9                   |
| 1353 | 1.24%                 | 0.04                 | 0.06%              | 0.65              | 0.01%          | 0.9           | 0.02%          | 0.8           | 0.09%             | 0.59             | 0.00%                 | 0.92                 | 0.00%                      | 1                         | 0.02%                  | 0.8                   |
| 1354 | 0.68%                 | 0.12                 | 0.00%              | 0.91              | 0.00%          | 0.9           | 0.40%          | 0.2           | 0.26%             | 0.35             | 0.78%                 | 0.122                | 0.02%                      | 0.8                       | 0.03%                  | 0.7                   |

|      | A   | B       | C          | D             | E             | F                      | G                | H                | I                      | J                     | K                  | L                 | M              | N             | O                         | P                        |
|------|-----|---------|------------|---------------|---------------|------------------------|------------------|------------------|------------------------|-----------------------|--------------------|-------------------|----------------|---------------|---------------------------|--------------------------|
| 1    | Chr | Gene    | SNP ID     | Position (bp) | Position (cM) | Minor allele frequency | Hardy-Weinberg P | Reference allele | H2_Prepulse inhibition | P_Prepulse inhibition | H2_P50 suppression | P_P50 suppression | H2_Antisaccade | P_Antisaccade | H2_Continuous performance | P_Continuous performance |
| 1355 | 22  | COMT    | rs4646316  | 18332132      | 13.66         | 0.29                   | 0.861            | C                | 0.04%                  | 0.74                  | 0.03%              | 0.8               | 0.97%          | 0.079         | 0.08%                     | 0.62                     |
| 1356 | 22  | COMT    | rs165774   | 18332561      | 13.66         | 0.29                   | 0.600            | G                | 0.09%                  | 0.61                  | 0.14%              | 0.6               | 0.85%          | 0.1           | 0.00%                     | 0.91                     |
| 1357 | 22  | COMT    | rs174696   | 18333176      | 13.66         | 0.25                   | 0.079            | T                | 0.05%                  | 0.69                  | 0.08%              | 0.6               | 0.09%          | 0.6           | 0.03%                     | 0.73                     |
| 1358 | 22  | COMT    | rs174697   | 18333832      | 13.66         | 0.07                   | 0.604            | G                | 3.64%                  | 0.0007                | 0.22%              | 0.4               | 0.00%          | 0.95          | 0.45%                     | 0.23                     |
| 1359 | 22  | ZDHHC8  | rs175174   | 18507554      | 13.78         | 0.40                   | 1.000            | A                | 0.01%                  | 0.88                  | 1.46%              | 0.06              | 0.09%          | 0.59          | 0.03%                     | 0.76                     |
| 1360 | 22  | ZDHHC8  | rs2286930  | 18508880      | 13.78         | 0.06                   | 1.000            | G                | 0.01%                  | 0.85                  | 0.18%              | 0.5               | 0.24%          | 0.38          | 0.06%                     | 0.67                     |
| 1361 | 22  | ADORA2A | rs2236624  | 23166024      | 23.69         | 0.24                   | 0.323            | C                | 0.81%                  | 0.111                 | 0.10%              | 0.6               | 0.77%          | 0.11          | 0.67%                     | 0.12                     |
| 1362 | 22  | ADRBK2  | rs576895   | 24261580      | 27.11         | 0.34                   | 0.342            | T                | 0.65%                  | 0.143                 | 0.10%              | 0.6               | 0.05%          | 0.66          | 0.01%                     | 0.89                     |
| 1363 | 22  | ADRBK2  | rs558934   | 24264721      | 27.11         | 0.33                   | 0.414            | G                | 0.76%                  | 0.132                 | 0.00%              | 1                 | 0.06%          | 0.67          | 0.00%                     | 0.97                     |
| 1364 | 22  | ADRBK2  | rs5761116  | 24280750      | 27.11         | 0.18                   | 0.816            | C                | 0.13%                  | 0.51                  | 0.01%              | 0.9               | 0.01%          | 0.89          | 0.22%                     | 0.38                     |
| 1365 | 22  | ADRBK2  | rs2283811  | 24305450      | 27.11         | 0.19                   | 0.500            | T                | 0.00%                  | 0.91                  | 0.00%              | 0.9               | 0.03%          | 0.73          | 0.43%                     | 0.21                     |
| 1366 | 22  | ADRBK2  | rs1008673  | 24324013      | 27.11         | 0.20                   | 0.005            | A                | 0.09%                  | 0.58                  | 0.01%              | 0.9               | 0.23%          | 0.36          | 0.05%                     | 0.68                     |
| 1367 | 22  | ADRBK2  | rs5761149  | 24376900      | 27.11         | 0.02                   | 1.000            | G                | 0.34%                  | 0.32                  | 0.02%              | 0.8               | 0.03%          | 0.76          | 0.12%                     | 0.51                     |
| 1368 | 22  | ADRBK2  | rs11913984 | 24389030      | 27.11         | 0.09                   | 1.000            | C                | 0.53%                  | 0.22                  | 0.05%              | 0.7               | 0.02%          | 0.81          | 0.08%                     | 0.58                     |
| 1369 | 22  | ADRBK2  | rs6004737  | 24395034      | 27.11         | 0.08                   | 1.000            | T                | 0.15%                  | 0.51                  | 0.03%              | 0.8               | 0.03%          | 0.75          | 0.83%                     | 0.082                    |
| 1370 | 22  | ADRBK2  | rs718163   | 24411873      | 27.11         | 0.41                   | 0.234            | G                | 0.01%                  | 0.87                  | 0.13%              | 0.5               | 0.05%          | 0.68          | 0.12%                     | 0.52                     |
| 1371 | 22  | ADRBK2  | rs5761159  | 24432308      | 27.11         | 0.41                   | 0.288            | G                | 0.01%                  | 0.86                  | 0.68%              | 0.2               | 0.01%          | 0.9           | 0.02%                     | 0.82                     |
| 1372 | 22  | ADRBK2  | rs9608416  | 24441018      | 27.11         | 0.44                   | 1.000            | A                | 0.01%                  | 0.86                  | 0.69%              | 0.2               | 0.00%          | 0.98          | 0.05%                     | 0.69                     |
| 1373 | 22  | ADRBK2  | rs6519621  | 24441816      | 27.11         | 0.09                   | 0.355            | T                | 0.11%                  | 0.58                  | 0.46%              | 0.2               | 0.00%          | 0.9           | 0.01%                     | 0.86                     |
| 1374 | 22  | CACNG2  | rs4820239  | 35288854      | 46.77         | 0.25                   | 0.553            | G                | 0.11%                  | 0.58                  | 0.14%              | 0.6               | 0.13%          | 0.53          | 0.00%                     | 0.93                     |
| 1375 | 22  | CACNG2  | rs2267341  | 35306921      | 46.94         | 0.35                   | 0.346            | T                | 0.30%                  | 0.35                  | 0.21%              | 0.5               | 0.05%          | 0.69          | 0.47%                     | 0.21                     |
| 1376 | 22  | CACNG2  | rs2283981  | 35316038      | 47.05         | 0.36                   | 1.000            | T                | 0.08%                  | 0.61                  | 0.00%              | 1                 | 0.01%          | 0.88          | 1.11%                     | 0.057                    |
| 1377 | 22  | CACNG2  | rs3788521  | 35322433      | 47.13         | 0.10                   | 0.227            | G                | 0.08%                  | 0.64                  | 0.01%              | 0.9               | 0.01%          | 0.85          | 0.30%                     | 0.32                     |
| 1378 | 22  | CACNG2  | rs738977   | 35338874      | 47.34         | 0.25                   | 0.127            | C                | 0.70%                  | 0.133                 | 0.57%              | 0.2               | 0.02%          | 0.77          | 0.49%                     | 0.18                     |
| 1379 | 22  | CACNG2  | rs738518   | 35449746      | 47.40         | 0.30                   | 0.492            | T                | 0.40%                  | 0.27                  | 0.09%              | 0.6               | 0.04%          | 0.72          | 0.00%                     | 0.97                     |
| 1380 | 22  | CACNG2  | rs736720   | 35532777      | 47.94         | 0.39                   | 0.758            | G                | 0.35%                  | 0.3                   | 0.44%              | 0.3               | 0.11%          | 0.56          | 0.03%                     | 0.75                     |
| 1381 | X   | HTR2C   | rs7881868  | 113753140     | 118.39        | 0.18                   | 0.385            | C                | 0.86%                  | 0.052                 | 0.00%              | 1                 | 0.08%          | 0.58          | 0.05%                     | 0.65                     |
| 1382 | X   | HTR2C   | rs2192372  | 113798029     | 118.50        | 0.36                   | 0.677            | G                | 0.01%                  | 0.83                  | 0.10%              | 0.5               | 0.07%          | 0.58          | 0.20%                     | 0.35                     |
| 1383 | X   | HTR2C   | rs5988087  | 113841112     | 118.60        | 0.18                   | 0.364            | C                | 0.79%                  | 0.061                 | 0.00%              | 1                 | 0.08%          | 0.58          | 0.05%                     | 0.66                     |
| 1384 | X   | HTR2C   | rs6318     | 113871991     | 118.67        | 0.19                   | 0.240            | G                | 0.84%                  | 0.055                 | 0.00%              | 0.9               | 0.07%          | 0.61          | 0.04%                     | 0.67                     |
| 1385 | X   | HTR2C   | rs2428707  | 113906615     | 118.75        | 0.19                   | 0.089            | G                | 0.91%                  | 0.047                 | 0.03%              | 0.7               | 0.05%          | 0.65          | 0.00%                     | 0.92                     |
| 1386 | X   | HTR2C   | rs2497504  | 113930668     | 118.80        | 0.19                   | 0.146            | G                | 0.87%                  | 0.052                 | 0.06%              | 0.6               | 0.06%          | 0.62          | 0.00%                     | 0.93                     |
| 1387 | X   | HTR2C   | rs4243981  | 113963054     | 118.88        | 0.19                   | 0.240            | C                | 1.03%                  | 0.034                 | 0.06%              | 0.6               | 0.04%          | 0.71          | 0.00%                     | 0.91                     |

|      | Q                     | R                    | S                  | T                 | U              | V             | W              | X             | Y                 | Z                | AA                    | AB                   | AC                         | AD                        | AE                     | AF                    |
|------|-----------------------|----------------------|--------------------|-------------------|----------------|---------------|----------------|---------------|-------------------|------------------|-----------------------|----------------------|----------------------------|---------------------------|------------------------|-----------------------|
| 1    | H2_Letter-Number Span | P_Letter-Number Span | H2_Verbal learning | P_Verbal learning | H2_Abstraction | P_Abstraction | H2_Face memory | P_Face memory | H2_Spatial memory | P_Spatial memory | H2_Spatial processing | P_Spatial processing | H2_Sensori-motor dexterity | P_Sensori-motor dexterity | H2_Emotion recognition | P_Emotion recognition |
| 1355 | 0.11%                 | 0.5                  | 2.42%              | 0.0036            | 0.50%          | 0.2           | 0.31%          | 0.3           | 0.34%             | 0.29             | 1.57%                 | 0.026                | 0.21%                      | 0.4                       | 0.20%                  | 0.4                   |
| 1356 | 0.47%                 | 0.2                  | 0.28%              | 0.32              | 1.29%          | 0.03          | 2.00%          | 0.008         | 0.00%             | 0.97             | 0.27%                 | 0.36                 | 0.32%                      | 0.3                       | 0.91%                  | 0.08                  |
| 1357 | 0.85%                 | 0.08                 | 0.01%              | 0.83              | 0.00%          | 1             | 0.00%          | 0.9           | 0.02%             | 0.78             | 0.34%                 | 0.3                  | 0.01%                      | 0.9                       | 0.03%                  | 0.7                   |
| 1358 | 0.83%                 | 0.07                 | 0.02%              | 0.78              | 0.73%          | 0.1           | 0.26%          | 0.3           | 0.06%             | 0.67             | 0.01%                 | 0.87                 | 0.00%                      | 1                         | 0.16%                  | 0.5                   |
| 1359 | 0.00%                 | 0.9                  | 0.03%              | 0.76              | 0.46%          | 0.2           | 0.47%          | 0.2           | 0.45%             | 0.25             | 0.03%                 | 0.79                 | 0.06%                      | 0.7                       | 0.00%                  | 1                     |
| 1360 | 0.09%                 | 0.6                  | 0.05%              | 0.67              | 0.00%          | 1             | 0.11%          | 0.5           | 0.00%             | 0.98             | 0.07%                 | 0.65                 | 0.09%                      | 0.6                       | 0.15%                  | 0.5                   |
| 1361 | 0.12%                 | 0.5                  | 0.02%              | 0.79              | 0.16%          | 0.5           | 0.10%          | 0.5           | 0.50%             | 0.2              | 0.15%                 | 0.5                  | 0.50%                      | 0.2                       | 0.00%                  | 1                     |
| 1362 | 0.03%                 | 0.7                  | 0.28%              | 0.3               | 0.73%          | 0.1           | 0.01%          | 0.9           | 0.22%             | 0.39             | 0.09%                 | 0.6                  | 1.45%                      | 0.02                      | 0.02%                  | 0.8                   |
| 1363 | 0.14%                 | 0.5                  | 0.00%              | 0.97              | 0.01%          | 0.9           | 0.00%          | 0.9           | 0.60%             | 0.16             | 0.01%                 | 0.84                 | 0.13%                      | 0.5                       | 0.59%                  | 0.2                   |
| 1364 | 0.07%                 | 0.6                  | 0.00%              | 0.96              | 0.02%          | 0.8           | 0.01%          | 0.8           | 0.06%             | 0.63             | 0.01%                 | 0.88                 | 0.27%                      | 0.3                       | 0.02%                  | 0.8                   |
| 1365 | 0.08%                 | 0.6                  | 0.01%              | 0.88              | 0.09%          | 0.6           | 0.06%          | 0.6           | 0.09%             | 0.57             | 0.08%                 | 0.61                 | 0.06%                      | 0.6                       | 0.02%                  | 0.8                   |
| 1366 | 0.46%                 | 0.2                  | 0.18%              | 0.4               | 0.71%          | 0.1           | 0.03%          | 0.7           | 0.64%             | 0.13             | 0.83%                 | 0.108                | 0.01%                      | 0.8                       | 1.36%                  | 0.02                  |
| 1367 | 0.01%                 | 0.9                  | 0.10%              | 0.53              | 0.00%          | 1             | 0.03%          | 0.8           | 0.07%             | 0.61             | 0.03%                 | 0.77                 | 0.03%                      | 0.8                       | 0.14%                  | 0.5                   |
| 1368 | 0.12%                 | 0.5                  | 0.02%              | 0.78              | 0.12%          | 0.5           | 0.05%          | 0.7           | 0.13%             | 0.5              | 0.07%                 | 0.64                 | 0.55%                      | 0.2                       | 0.39%                  | 0.2                   |
| 1369 | 0.04%                 | 0.7                  | 0.20%              | 0.37              | 0.02%          | 0.8           | 0.47%          | 0.2           | 0.35%             | 0.25             | 0.00%                 | 0.97                 | 0.01%                      | 0.8                       | 0.07%                  | 0.6                   |
| 1370 | 0.30%                 | 0.3                  | 0.06%              | 0.63              | 0.09%          | 0.5           | 0.07%          | 0.6           | 1.25%             | 0.035            | 0.21%                 | 0.42                 | 0.77%                      | 0.08                      | 0.22%                  | 0.4                   |
| 1371 | 0.45%                 | 0.2                  | 0.07%              | 0.62              | 0.27%          | 0.3           | 0.06%          | 0.6           | 0.36%             | 0.27             | 0.08%                 | 0.62                 | 0.71%                      | 0.1                       | 0.02%                  | 0.8                   |
| 1372 | 0.32%                 | 0.3                  | 0.20%              | 0.4               | 0.09%          | 0.6           | 0.13%          | 0.5           | 0.11%             | 0.55             | 0.04%                 | 0.75                 | 0.56%                      | 0.14                      | 0.00%                  | 0.9                   |
| 1373 | 0.09%                 | 0.6                  | 0.00%              | 0.93              | 0.10%          | 0.6           | 0.46%          | 0.2           | 0.10%             | 0.54             | 0.07%                 | 0.63                 | 0.00%                      | 0.9                       | 0.00%                  | 0.9                   |
| 1374 | 0.00%                 | 1                    | 0.00%              | 0.91              | 0.15%          | 0.5           | 0.01%          | 0.9           | 0.01%             | 0.87             | 0.15%                 | 0.51                 | 0.22%                      | 0.4                       | 0.43%                  | 0.2                   |
| 1375 | 0.01%                 | 0.9                  | 0.05%              | 0.67              | 0.01%          | 0.9           | 0.61%          | 0.14          | 0.50%             | 0.19             | 0.67%                 | 0.146                | 0.02%                      | 0.8                       | 0.23%                  | 0.4                   |
| 1376 | 0.03%                 | 0.7                  | 0.14%              | 0.48              | 0.19%          | 0.4           | 0.54%          | 0.2           | 0.41%             | 0.24             | 0.65%                 | 0.16                 | 0.53%                      | 0.2                       | 0.64%                  | 0.13                  |
| 1377 | 0.31%                 | 0.3                  | 0.53%              | 0.18              | 0.63%          | 0.14          | 0.12%          | 0.5           | 0.04%             | 0.72             | 0.12%                 | 0.55                 | 0.00%                      | 0.9                       | 0.00%                  | 1                     |
| 1378 | 0.15%                 | 0.4                  | 0.05%              | 0.65              | 0.02%          | 0.8           | 0.20%          | 0.4           | 0.36%             | 0.25             | 0.18%                 | 0.43                 | 0.05%                      | 0.7                       | 0.02%                  | 0.8                   |
| 1379 | 0.00%                 | 0.9                  | 0.28%              | 0.31              | 0.33%          | 0.3           | 0.87%          | 0.08          | 0.40%             | 0.25             | 0.77%                 | 0.126                | 0.01%                      | 0.8                       | 0.21%                  | 0.4                   |
| 1380 | 0.18%                 | 0.4                  | 0.07%              | 0.61              | 0.07%          | 0.6           | 0.01%          | 0.8           | 0.04%             | 0.71             | 0.96%                 | 0.093                | 0.00%                      | 1                         | 0.79%                  | 0.1                   |
| 1381 | 0.20%                 | 0.3                  | 0.00%              | 0.92              | 0.08%          | 0.5           | 0.79%          | 0.06          | 0.31%             | 0.27             | 0.15%                 | 0.45                 | 0.05%                      | 0.6                       | 0.00%                  | 0.9                   |
| 1382 | 0.02%                 | 0.8                  | 0.21%              | 0.34              | 0.12%          | 0.4           | 0.50%          | 0.13          | 0.06%             | 0.62             | 0.06%                 | 0.64                 | 0.16%                      | 0.4                       | 0.13%                  | 0.5                   |
| 1383 | 0.17%                 | 0.3                  | 0.08%              | 0.58              | 0.03%          | 0.7           | 0.57%          | 0.11          | 0.33%             | 0.26             | 0.23%                 | 0.35                 | 0.06%                      | 0.6                       | 0.01%                  | 0.9                   |
| 1384 | 0.19%                 | 0.3                  | 0.03%              | 0.73              | 0.02%          | 0.8           | 0.66%          | 0.09          | 0.23%             | 0.35             | 0.21%                 | 0.38                 | 0.07%                      | 0.6                       | 0.00%                  | 0.9                   |
| 1385 | 0.15%                 | 0.4                  | 0.12%              | 0.49              | 0.23%          | 0.3           | 1.09%          | 0.03          | 0.32%             | 0.27             | 0.01%                 | 0.87                 | 0.18%                      | 0.4                       | 0.06%                  | 0.6                   |
| 1386 | 0.14%                 | 0.4                  | 0.20%              | 0.37              | 0.29%          | 0.2           | 0.93%          | 0.04          | 0.43%             | 0.19             | 0.02%                 | 0.79                 | 0.22%                      | 0.3                       | 0.04%                  | 0.7                   |
| 1387 | 0.14%                 | 0.4                  | 0.22%              | 0.34              | 0.33%          | 0.2           | 0.98%          | 0.04          | 0.47%             | 0.18             | 0.00%                 | 0.93                 | 0.15%                      | 0.4                       | 0.10%                  | 0.5                   |
