# Supplementary material for: Prevalence of Autism Spectrum Disorders in a Total Population Sample
Source: Atypon-hosted journal article supplement (doi:10.1176/appi.ajp.2011.10101532), 2011-05-10
Supplement: ajp_168_09_904_03.pdf [file ajp_168_09_904_03.pdf]

| SNP        | Gene   | Endophenotype            | Extreme Z*s | Cumulative P Value | Predictive Value |
|------------|--------|--------------------------|-------------|--------------------|------------------|
| rs533337   | GRIK3  | Prepulse inhibition      | 35          | 0.045              | 55%              |
| rs1587526  | GRIK3  | Prepulse inhibition      | 29          | 0.037              | 59%              |
| rs1027599  | GRIK3  | Prepulse inhibition      | 27          | 0.031              | 60%              |
| rs3767078  | GRIK3  | Verbal learning          | 0           | 0.001              | 93%              |
| rs3767078  | GRIK3  | Spatial processing       | 1           | 0.002              | 90%              |
| rs3767087  | GRIK3  | Senosori-motor dexterity | 0           | 0.001              | 93%              |
| rs10489412 | GRIK3  | Spatial memory           | 15          | 0.015              | 70%              |
| rs10489412 | GRIK3  | Emotion recognition      | 0           | 0.001              | 93%              |
| rs697923   | GRIK3  | Emotion recognition      | 29          | 0.037              | 59%              |
| rs575605   | GRIK3  | Prepulse inhibition      | 14          | 0.015              | 71%              |
| rs12746787 | GRIK3  | Facial memory            | 0           | 0.001              | 93%              |
| rs12746787 | GRIK3  | Spatial processing       | 0           | 0.001              | 93%              |
| rs12746787 | GRIK3  | Senosori-motor dexterity | 0           | 0.001              | 93%              |
| rs951121   | NOS1AP | Continuous performance   | 33          | 0.042              | 56%              |
| rs1538018  | NOS1AP | Prepulse inhibition      | 32          | 0.042              | 56%              |
| rs4657165  | NOS1AP | Verbal learning          | 27          | 0.031              | 60%              |
| rs3751286  | NOS1AP | Senosori-motor dexterity | 13          | 0.015              | 70%              |
| rs3751286  | NOS1AP | Emotion recognition      | 13          | 0.015              | 70%              |
| rs4326657  | ASPM   | Prepulse inhibition      | 0           | 0.001              | 93%              |
| rs4326657  | ASPM   | Abstraction              | 40          | 0.050              | 53%              |
| rs4326657  | ASPM   | Facial memory            | 0           | 0.001              | 93%              |
| rs2082552  | DISC1  | Spatial processing       | 40          | 0.050              | 53%              |
| rs884158   | DISC1  | P50 suppression          | 10          | 0.013              | 73%              |
| rs967244   | DISC1  | Letter-Number Span       | 39          | 0.050              | 53%              |
| rs3081     | DISC1  | Antisaccade              | 0           | 0.001              | 93%              |
| rs967433   | DISC1  | Continuous performance   | 13          | 0.015              | 70%              |
| rs967433   | DISC1  | Emotion recognition      | 40          | 0.050              | 53%              |
| rs821585   | DISC1  | Facial memory            | 0           | 0.001              | 93%              |
| rs821585   | DISC1  | Spatial processing       | 0           | 0.001              | 93%              |
| rs821585   | DISC1  | Senosori-motor dexterity | 3           | 0.005              | 84%              |
| rs821597   | DISC1  | P50 suppression          | 0           | 0.001              | 93%              |
| rs821662   | DISC1  | P50 suppression          | 25          | 0.029              | 61%              |
| rs843979   | DISC1  | P50 suppression          | 24          | 0.024              | 62%              |
| rs1864551  | CTNNA2 | Continuous performance   | 0           | 0.001              | 93%              |
| rs1367399  | CTNNA2 | Continuous performance   | 19          | 0.021              | 66%              |
| rs880813   | CTNNA2 | Continuous performance   | 8           | 0.011              | 74%              |
| rs1971766  | CTNNA2 | Continuous performance   | 8           | 0.011              | 74%              |
| rs4852514  | CTNNA2 | Spatial processing       | 18          | 0.018              | 67%              |
| rs540905   | CTNNA2 | Prepulse inhibition      | 26          | 0.030              | 60%              |
| rs7605424  | CTNNA2 | Continuous performance   | 12          | 0.015              | 70%              |
| rs2902109  | CTNNA2 | Continuous performance   | 40          | 0.050              | 53%              |
| rs3849389  | CTNNA2 | Spatial processing       | 21          | 0.022              | 65%              |
| rs1816531  | ERBB4  | Letter-Number Span       | 37          | 0.048              | 54%              |
| rs4278873  | ERBB4  | Continuous performance   | 18          | 0.018              | 67%              |
| rs4278873  | ERBB4  | Spatial processing       | 13          | 0.015              | 70%              |

| SNP        | Gene   | Endophenotype            | Extreme Z's | Cumulative P Value | Predictive Value |
|------------|--------|--------------------------|-------------|--------------------|------------------|
| rs10497946 | ERBB4  | Abstraction              | 0           | 0.001              | 93%              |
| rs6435644  | ERBB4  | Prepulse inhibition      | 0           | 0.001              | 93%              |
| rs6435644  | ERBB4  | Antisaccade              | 4           | 0.007              | 81%              |
| rs6435644  | ERBB4  | Abstraction              | 20          | 0.021              | 65%              |
| rs6435647  | ERBB4  | Spatial memory           | 39          | 0.050              | 53%              |
| rs1818750  | ERBB4  | Emotion recognition      | 28          | 0.035              | 59%              |
| rs4673633  | ERBB4  | Abstraction              | 10          | 0.013              | 73%              |
| rs7600260  | ERBB4  | Facial memory            | 6           | 0.009              | 76%              |
| rs7600260  | ERBB4  | Spatial memory           | 0           | 0.001              | 93%              |
| rs11887994 | ERBB4  | Facial memory            | 8           | 0.011              | 74%              |
| rs11887994 | ERBB4  | Spatial processing       | 38          | 0.050              | 53%              |
| rs10497953 | ERBB4  | Spatial processing       | 6           | 0.009              | 76%              |
| rs10497956 | ERBB4  | Abstraction              | 4           | 0.007              | 81%              |
| rs987320   | ERBB4  | Continuous performance   | 5           | 0.009              | 79%              |
| rs6737841  | ERBB4  | Antisaccade              | 19          | 0.021              | 66%              |
| rs6737841  | ERBB4  | Spatial processing       | 2           | 0.003              | 86%              |
| rs6737841  | ERBB4  | Senosori-motor dexterity | 8           | 0.011              | 74%              |
| rs1505366  | ERBB4  | Senosori-motor dexterity | 9           | 0.013              | 73%              |
| rs10497972 | ERBB4  | Spatial processing       | 21          | 0.022              | 65%              |
| rs1394795  | ERBB4  | Continuous performance   | 29          | 0.037              | 59%              |
| rs972489   | ERBB4  | Antisaccade              | 13          | 0.015              | 70%              |
| rs7564771  | ERBB4  | Antisaccade              | 0           | 0.001              | 93%              |
| rs9876005  | SLC6A1 | Antisaccade              | 1           | 0.002              | 90%              |
| rs968824   | GSK3B  | Spatial processing       | 27          | 0.031              | 60%              |
| rs13109229 | GRID2  | Letter-Number Span       | 15          | 0.015              | 70%              |
| rs6811045  | GRID2  | Prepulse inhibition      | 1           | 0.002              | 90%              |
| rs6811045  | GRID2  | Antisaccade              | 14          | 0.015              | 71%              |
| rs6811045  | GRID2  | Spatial processing       | 3           | 0.005              | 84%              |
| rs6811045  | GRID2  | Emotion recognition      | 3           | 0.005              | 84%              |
| rs13435785 | GRID2  | Facial memory            | 17          | 0.018              | 67%              |
| rs13435785 | GRID2  | Emotion recognition      | 0           | 0.001              | 93%              |
| rs1479332  | GRID2  | Emotion recognition      | 3           | 0.005              | 84%              |
| rs729545   | GRID2  | Continuous performance   | 10          | 0.013              | 73%              |
| rs1912718  | GRID2  | P50 suppression          | 32          | 0.042              | 56%              |
| rs1912718  | GRID2  | Spatial processing       | 13          | 0.015              | 70%              |
| rs1155646  | GRID2  | P50 suppression          | 4           | 0.007              | 81%              |
| rs1875705  | GRID2  | P50 suppression          | 12          | 0.015              | 70%              |
| rs1875705  | GRID2  | Spatial processing       | 29          | 0.037              | 59%              |
| rs4524351  | GRID2  | P50 suppression          | 24          | 0.024              | 62%              |
| rs4524351  | GRID2  | Spatial processing       | 38          | 0.050              | 53%              |
| rs2870699  | GRID2  | Prepulse inhibition      | 26          | 0.030              | 60%              |
| rs1948016  | GRID2  | Prepulse inhibition      | 35          | 0.045              | 55%              |
| rs1948017  | GRID2  | Emotion recognition      | 35          | 0.045              | 55%              |
| rs1905733  | GRID2  | Emotion recognition      | 0           | 0.001              | 93%              |
| rs10516921 | GRID2  | P50 suppression          | 13          | 0.015              | 70%              |

| SNP        | Gene   | Endophenotype            | Extreme Z's | Cumulative P Value | Predictive Value |
|------------|--------|--------------------------|-------------|--------------------|------------------|
| rs10516921 | GRID2  | Antisaccade              | 2           | 0.003              | 86%              |
| rs1485015  | GRID2  | Prepulse inhibition      | 18          | 0.018              | 67%              |
| rs4557232  | GRID2  | Senosori-motor dexterity | 13          | 0.015              | 70%              |
| rs9307127  | GRID2  | Prepulse inhibition      | 14          | 0.015              | 71%              |
| rs9307127  | GRID2  | Verbal learning          | 14          | 0.015              | 71%              |
| rs2196320  | GRID2  | Prepulse inhibition      | 5           | 0.009              | 79%              |
| rs1435477  | GRID2  | P50 suppression          | 5           | 0.009              | 79%              |
| rs11946557 | GRID2  | P50 suppression          | 9           | 0.013              | 73%              |
| rs11946557 | GRID2  | Antisaccade              | 20          | 0.021              | 65%              |
| rs6350     | SLC6A3 | Facial memory            | 26          | 0.030              | 60%              |
| rs1423691  | HTR1A  | Verbal learning          | 10          | 0.013              | 73%              |
| rs6865878  | HTR4   | Continuous performance   | 1           | 0.002              | 90%              |
| rs6865878  | HTR4   | Abstraction              | 14          | 0.015              | 71%              |
| rs6865878  | HTR4   | Spatial memory           | 0           | 0.001              | 93%              |
| rs6865878  | HTR4   | Senosori-motor dexterity | 31          | 0.041              | 57%              |
| rs7711800  | HTR4   | Verbal learning          | 32          | 0.042              | 56%              |
| rs2068190  | HTR4   | Facial memory            | 36          | 0.046              | 54%              |
| rs2304042  | CAMK2A | Letter-Number Span       | 10          | 0.013              | 73%              |
| rs1432832  | CAMK2A | Prepulse inhibition      | 9           | 0.013              | 73%              |
| rs2910298  | GABRB2 | Abstraction              | 35          | 0.045              | 55%              |
| rs2962402  | GABRB2 | Antisaccade              | 22          | 0.023              | 64%              |
| rs2962402  | GABRB2 | Senosori-motor dexterity | 0           | 0.001              | 93%              |
| rs29234    | MOG    | Senosori-motor dexterity | 27          | 0.031              | 60%              |
| rs2229901  | GRM4   | Spatial processing       | 2           | 0.003              | 86%              |
| rs2229901  | GRM4   | Emotion recognition      | 1           | 0.002              | 90%              |
| rs2451383  | GRM4   | Spatial memory           | 15          | 0.015              | 70%              |
| rs2451383  | GRM4   | Spatial processing       | 9           | 0.013              | 73%              |
| rs2451383  | GRM4   | Emotion recognition      | 33          | 0.042              | 56%              |
| rs9469690  | GRM4   | Emotion recognition      | 11          | 0.014              | 71%              |
| rs1565364  | GRM4   | Spatial processing       | 35          | 0.045              | 55%              |
| rs733457   | GRM4   | Abstraction              | 15          | 0.015              | 70%              |
| rs747373   | GRM4   | Abstraction              | 39          | 0.050              | 53%              |
| rs8192624  | TAAR6  | Continuous performance   | 7           | 0.011              | 74%              |
| rs362956   | GRM1   | Antisaccade              | 0           | 0.001              | 93%              |
| rs362956   | GRM1   | Facial memory            | 37          | 0.048              | 54%              |
| rs362956   | GRM1   | Spatial memory           | 2           | 0.003              | 86%              |
| rs61914    | GRM1   | Spatial memory           | 29          | 0.037              | 59%              |
| rs61914    | GRM1   | Emotion recognition      | 36          | 0.046              | 54%              |
| rs362895   | GRM1   | Abstraction              | 7           | 0.011              | 74%              |
| rs362895   | GRM1   | Spatial processing       | 12          | 0.015              | 70%              |
| rs362848   | GRM1   | Spatial memory           | 24          | 0.024              | 62%              |
| rs9403775  | GRM1   | Verbal learning          | 38          | 0.050              | 53%              |
| rs362925   | GRM1   | Senosori-motor dexterity | 0           | 0.001              | 93%              |
| rs362854   | GRM1   | Facial memory            | 38          | 0.050              | 53%              |
| rs362854   | GRM1   | Spatial memory           | 1           | 0.002              | 90%              |

| SNP        | Gene    | Endophenotype            | Extreme Z's | Cumulative P Value | Predictive Value |
|------------|---------|--------------------------|-------------|--------------------|------------------|
| rs362854   | GRM1    | Spatial processing       | 4           | 0.007              | 81%              |
| rs362854   | GRM1    | Senosori-motor dexterity | 23          | 0.024              | 63%              |
| rs362854   | GRM1    | Emotion recognition      | 32          | 0.042              | 56%              |
| rs362936   | GRM1    | Facial memory            | 0           | 0.001              | 93%              |
| rs3804295  | GRM1    | Spatial memory           | 19          | 0.021              | 66%              |
| rs2941     | GRM1    | Prepulse inhibition      | 2           | 0.003              | 86%              |
| rs2941     | GRM1    | Verbal learning          | 1           | 0.002              | 90%              |
| rs2941     | GRM1    | Facial memory            | 0           | 0.001              | 93%              |
| rs2941     | GRM1    | Senosori-motor dexterity | 0           | 0.001              | 93%              |
| rs7770466  | GRM1    | Verbal learning          | 27          | 0.031              | 60%              |
| rs1709182  | ESR1    | Abstraction              | 36          | 0.046              | 54%              |
| rs9340835  | ESR1    | Abstraction              | 23          | 0.024              | 63%              |
| rs9340949  | ESR1    | P50 suppression          | 0           | 0.001              | 93%              |
| rs9340949  | ESR1    | Antisaccade              | 0           | 0.001              | 93%              |
| rs9340949  | ESR1    | Verbal learning          | 14          | 0.015              | 71%              |
| rs2282888  | SP4     | Spatial processing       | 10          | 0.013              | 73%              |
| rs10233357 | SP4     | Letter-Number Span       | 0           | 0.001              | 93%              |
| rs3807643  | SP4     | Letter-Number Span       | 1           | 0.002              | 90%              |
| rs2282896  | SP4     | Letter-Number Span       | 0           | 0.001              | 93%              |
| rs3807641  | SP4     | Letter-Number Span       | 0           | 0.001              | 93%              |
| rs12668354 | SP4     | Spatial processing       | 8           | 0.011              | 74%              |
| rs10487055 | GRM3    | P50 suppression          | 1           | 0.002              | 90%              |
| rs10487055 | GRM3    | Senosori-motor dexterity | 4           | 0.007              | 81%              |
| rs2528858  | RELN    | Continuous performance   | 39          | 0.050              | 53%              |
| rs2075039  | RELN    | Antisaccade              | 4           | 0.007              | 81%              |
| rs10487160 | RELN    | Emotion recognition      | 26          | 0.030              | 60%              |
| rs2229860  | RELN    | Prepulse inhibition      | 0           | 0.001              | 93%              |
| rs2229860  | RELN    | Antisaccade              | 2           | 0.003              | 86%              |
| rs2229860  | RELN    | Facial memory            | 0           | 0.001              | 93%              |
| rs2229860  | RELN    | Spatial memory           | 0           | 0.001              | 93%              |
| rs123712   | RELN    | Spatial processing       | 14          | 0.015              | 71%              |
| rs123712   | RELN    | Emotion recognition      | 29          | 0.037              | 59%              |
| rs471360   | RELN    | Facial memory            | 10          | 0.013              | 73%              |
| rs694894   | RELN    | Senosori-motor dexterity | 13          | 0.015              | 70%              |
| rs1404431  | RELN    | Antisaccade              | 24          | 0.024              | 62%              |
| rs802787   | RELN    | Spatial memory           | 21          | 0.022              | 65%              |
| rs10487175 | RELN    | Spatial memory           | 13          | 0.015              | 70%              |
| rs17092104 | SLC18A1 | Antisaccade              | 16          | 0.015              | 69%              |
| rs10503779 | EBF2    | P50 suppression          | 21          | 0.022              | 65%              |
| rs4281084  | NRG1    | Spatial processing       | 0           | 0.001              | 93%              |
| rs7840792  | NRG1    | Continuous performance   | 14          | 0.015              | 71%              |
| rs10503888 | NRG1    | Abstraction              | 0           | 0.001              | 93%              |
| rs10110401 | NRG1    | Abstraction              | 39          | 0.050              | 53%              |
| rs10110401 | NRG1    | Emotion recognition      | 2           | 0.003              | 86%              |
| rs12549243 | NRG1    | Facial memory            | 38          | 0.050              | 53%              |

| SNP        | Gene   | Endophenotype            | Extreme Z's | Cumulative P Value | Predictive Value |
|------------|--------|--------------------------|-------------|--------------------|------------------|
| rs7822564  | NRG1   | Prepulse inhibition      | 17          | 0.018              | 67%              |
| rs901561   | NRG1   | Prepulse inhibition      | 8           | 0.011              | 74%              |
| rs10103930 | NRG1   | Abstraction              | 18          | 0.018              | 67%              |
| rs7842667  | NRG1   | Verbal learning          | 14          | 0.015              | 71%              |
| rs7844425  | NRG1   | Abstraction              | 23          | 0.024              | 63%              |
| rs7844425  | NRG1   | Senosori-motor dexterity | 3           | 0.005              | 84%              |
| rs10113593 | NRG1   | Continuous performance   | 21          | 0.022              | 65%              |
| rs7000590  | NRG1   | Verbal learning          | 10          | 0.013              | 73%              |
| rs4733130  | NRG1   | Verbal learning          | 15          | 0.015              | 70%              |
| rs4733130  | NRG1   | Abstraction              | 11          | 0.014              | 71%              |
| rs4733130  | NRG1   | Senosori-motor dexterity | 1           | 0.002              | 90%              |
| rs2439312  | NRG1   | Verbal learning          | 7           | 0.011              | 74%              |
| rs11776203 | NRG1   | Verbal learning          | 1           | 0.002              | 90%              |
| rs3924999  | NRG1   | Verbal learning          | 1           | 0.002              | 90%              |
| rs7844824  | CHRN3  | Continuous performance   | 36          | 0.046              | 54%              |
| rs1407877  | GRIN3A | Antisaccade              | 22          | 0.023              | 64%              |
| rs3739724  | GRIN3A | Prepulse inhibition      | 1           | 0.002              | 90%              |
| rs942141   | GRIN3A | Prepulse inhibition      | 1           | 0.002              | 90%              |
| rs1323413  | GRIN3A | Prepulse inhibition      | 18          | 0.018              | 67%              |
| rs1337697  | GRIN3A | Prepulse inhibition      | 17          | 0.018              | 67%              |
| rs2797853  | DBH    | Antisaccade              | 31          | 0.041              | 57%              |
| rs2073833  | DBH    | Prepulse inhibition      | 8           | 0.011              | 74%              |
| rs11146020 | GRIN1  | Senosori-motor dexterity | 0           | 0.001              | 93%              |
| rs2301364  | GRIN1  | Senosori-motor dexterity | 0           | 0.001              | 93%              |
| rs2616673  | GRID1  | Continuous performance   | 33          | 0.042              | 56%              |
| rs1880386  | GRID1  | Continuous performance   | 6           | 0.009              | 76%              |
| rs11599415 | GRID1  | Senosori-motor dexterity | 0           | 0.001              | 93%              |
| rs4393254  | GRID1  | Emotion recognition      | 3           | 0.005              | 84%              |
| rs11201945 | GRID1  | Continuous performance   | 39          | 0.050              | 53%              |
| rs3750625  | ADRA2A | Spatial memory           | 8           | 0.011              | 74%              |
| rs2070762  | TH     | Continuous performance   | 35          | 0.045              | 55%              |
| rs2273688  | SLC1A2 | Continuous performance   | 23          | 0.024              | 63%              |
| rs2273688  | SLC1A2 | Spatial memory           | 18          | 0.018              | 67%              |
| rs2025111  | SLC1A2 | Letter-Number Span       | 37          | 0.048              | 54%              |
| rs2025111  | SLC1A2 | Abstraction              | 9           | 0.013              | 73%              |
| rs2025111  | SLC1A2 | Spatial processing       | 17          | 0.018              | 67%              |
| rs1320443  | SLC1A2 | Spatial processing       | 9           | 0.013              | 73%              |
| rs1885345  | SLC1A2 | Continuous performance   | 15          | 0.015              | 70%              |
| rs911562   | SLC1A2 | Continuous performance   | 0           | 0.001              | 93%              |
| rs4593985  | SLC1A2 | Continuous performance   | 8           | 0.011              | 74%              |
| rs1923292  | SLC1A2 | Continuous performance   | 30          | 0.039              | 58%              |
| rs4963323  | CHRM1  | Senosori-motor dexterity | 35          | 0.045              | 55%              |
| rs10501669 | GRM5   | Letter-Number Span       | 3           | 0.005              | 84%              |
| rs308875   | GRM5   | Senosori-motor dexterity | 13          | 0.015              | 70%              |
| rs2133395  | GRM5   | Senosori-motor dexterity | 3           | 0.005              | 84%              |

| SNP        | Gene    | Endophenotype            | Extreme Z's | Cumulative P Value | Predictive Value |
|------------|---------|--------------------------|-------------|--------------------|------------------|
| rs1499043  | GRM5    | Antisaccade              | 0           | 0.001              | 93%              |
| rs1499043  | GRM5    | Continuous performance   | 18          | 0.018              | 67%              |
| rs1499043  | GRM5    | Spatial processing       | 14          | 0.015              | 71%              |
| rs1499043  | GRM5    | Senosori-motor dexterity | 3           | 0.005              | 84%              |
| rs547644   | GRM5    | Facial memory            | 0           | 0.001              | 93%              |
| rs167569   | GRM5    | Facial memory            | 0           | 0.001              | 93%              |
| rs1261878  | NCAM1   | Prepulse inhibition      | 14          | 0.015              | 71%              |
| rs7125415  | DRD2    | Continuous performance   | 5           | 0.009              | 79%              |
| rs4274224  | DRD2    | Antisaccade              | 40          | 0.050              | 53%              |
| rs10502242 | GRIK4   | Antisaccade              | 5           | 0.009              | 79%              |
| rs10502242 | GRIK4   | Verbal learning          | 22          | 0.023              | 64%              |
| rs7948804  | GRIK4   | P50 suppression          | 12          | 0.015              | 70%              |
| rs948028   | GRIK4   | P50 suppression          | 11          | 0.014              | 71%              |
| rs1815771  | GRIK4   | P50 suppression          | 40          | 0.050              | 53%              |
| rs10502243 | GRIK4   | Abstraction              | 25          | 0.029              | 61%              |
| rs2298724  | GRIK4   | Verbal learning          | 6           | 0.009              | 76%              |
| rs4936570  | GRIK4   | Antisaccade              | 3           | 0.005              | 84%              |
| rs890      | GRIN2B  | Spatial processing       | 0           | 0.001              | 93%              |
| rs1806194  | GRIN2B  | Spatial processing       | 34          | 0.043              | 55%              |
| rs2193147  | GRIN2B  | Spatial processing       | 33          | 0.042              | 56%              |
| rs10492137 | GRIN2B  | Emotion recognition      | 20          | 0.021              | 65%              |
| rs1120905  | GRIN2B  | Verbal learning          | 9           | 0.013              | 73%              |
| rs10772713 | GRIN2B  | Verbal learning          | 10          | 0.013              | 73%              |
| rs2300279  | GRIN2B  | Verbal learning          | 16          | 0.015              | 69%              |
| rs10492141 | GRIN2B  | Verbal learning          | 16          | 0.015              | 69%              |
| rs11055673 | GRIN2B  | Verbal learning          | 14          | 0.015              | 71%              |
| rs2160729  | GRIN2B  | Verbal learning          | 14          | 0.015              | 71%              |
| rs12829455 | GRIN2B  | Verbal learning          | 15          | 0.015              | 70%              |
| rs4457792  | BLOC1S1 | Abstraction              | 0           | 0.001              | 93%              |
| rs10507017 | EEA1    | P50 suppression          | 34          | 0.043              | 55%              |
| rs9316233  | HTR2A   | Spatial processing       | 9           | 0.013              | 73%              |
| rs985933   | HTR2A   | Antisaccade              | 18          | 0.018              | 67%              |
| rs2070036  | HTR2A   | Antisaccade              | 1           | 0.002              | 90%              |
| rs4142900  | HTR2A   | Letter-Number Span       | 12          | 0.015              | 70%              |
| rs2494732  | AKT1    | Facial memory            | 30          | 0.039              | 58%              |
| rs1130214  | AKT1    | Continuous performance   | 7           | 0.011              | 74%              |
| rs3826029  | CHRNA7  | Prepulse inhibition      | 8           | 0.011              | 74%              |
| rs885071   | CHRNA7  | Prepulse inhibition      | 10          | 0.013              | 73%              |
| rs1448239  | GRIN2A  | Emotion recognition      | 34          | 0.043              | 55%              |
| rs4782262  | GRIN2A  | Emotion recognition      | 21          | 0.022              | 65%              |
| rs1345424  | GRIN2A  | Letter-Number Span       | 18          | 0.018              | 67%              |
| rs9912147  | YWHAE   | Emotion recognition      | 8           | 0.011              | 74%              |
| rs222853   | DLG4    | Letter-Number Span       | 14          | 0.015              | 71%              |
| rs222853   | DLG4    | Continuous performance   | 0           | 0.001              | 93%              |
| rs222853   | DLG4    | Spatial processing       | 27          | 0.031              | 60%              |

| SNP       | Gene    | Endophenotype            | Extreme Z*s | Cumulative P Value | Predictive Value |
|-----------|---------|--------------------------|-------------|--------------------|------------------|
| rs507506  | DLG4    | Emotion recognition      | 20          | 0.021              | 65%              |
| rs6355    | SLC6A4  | Antisaccade              | 1           | 0.002              | 90%              |
| rs4392119 | SLC6A4  | P50 suppression          | 38          | 0.050              | 53%              |
| rs4392119 | SLC6A4  | Antisaccade              | 0           | 0.001              | 93%              |
| rs4792882 | CRHR1   | Antisaccade              | 5           | 0.009              | 79%              |
| rs4792882 | CRHR1   | Verbal learning          | 33          | 0.042              | 56%              |
| rs4792882 | CRHR1   | Abstraction              | 2           | 0.003              | 86%              |
| rs81189   | CRHR1   | Antisaccade              | 28          | 0.035              | 59%              |
| rs1321099 | SLC32A1 | Verbal learning          | 8           | 0.011              | 74%              |
| rs755203  | CHRNA4  | Senosori-motor dexterity | 1           | 0.002              | 90%              |
| rs367766  | PRODH   | Antisaccade              | 7           | 0.011              | 74%              |
| rs740603  | COMT    | Letter-Number Span       | 13          | 0.015              | 70%              |
| rs4646316 | COMT    | Verbal learning          | 12          | 0.015              | 70%              |
| rs4646316 | COMT    | Spatial processing       | 26          | 0.030              | 60%              |
| rs174697  | COMT    | Prepulse inhibition      | 1           | 0.002              | 90%              |
| rs7881868 | HTR2C   | Prepulse inhibition      | 20          | 0.021              | 65%              |
| rs5988087 | HTR2C   | Prepulse inhibition      | 35          | 0.045              | 55%              |
| rs6318    | HTR2C   | Prepulse inhibition      | 29          | 0.037              | 59%              |
| rs2428707 | HTR2C   | Prepulse inhibition      | 23          | 0.024              | 63%              |
| rs2497504 | HTR2C   | Prepulse inhibition      | 27          | 0.031              | 60%              |
| rs4243981 | HTR2C   | Prepulse inhibition      | 20          | 0.021              | 65%              |
| rs389292  | GABRA3  | Emotion recognition      | 12          | 0.015              | 70%              |

Key: No. More Extreme Z\*s = the (one-sided) number of Z\*s in the 10,000 bootstrap data sets in the training group that exceed the observed Z, which ranges from 0 (most significant) to 40 (least significant) among the 292 most significant findings by the bootstrap analysis
